# 1 **Integrated view and comparative analysis of baseline protein** 2 **expression in mouse and rat tissues**

3  
4  
5 Shengbo Wang<sup>1†</sup>, David García-Seisdedos<sup>1,2†</sup>, Ananth Prakash<sup>1,2†\*</sup>, Deepti Jaiswal Kundu<sup>1</sup>,  
6 Andrew Collins<sup>3</sup>, Nancy George<sup>1</sup>, Silvie Fexova<sup>1</sup>, Pablo Moreno<sup>1</sup>, Irene Papatheodorou<sup>1,2</sup>,  
7 Andrew R. Jones<sup>3</sup>, Juan Antonio Vizcaíno<sup>1,2\*</sup>

8  
9 <sup>1</sup> European Molecular Biology Laboratory - European Bioinformatics Institute (EMBL-EBI),  
10 Wellcome Genome Campus, Hinxton, Cambridge, CB10 1SD. United Kingdom.

11  
12 <sup>2</sup> Open Targets, Wellcome Genome Campus, Hinxton, Cambridge, CB10 1SD. United  
13 Kingdom.

14  
15 <sup>3</sup> Institute of Systems, Molecular and Integrative Biology, University of Liverpool, Liverpool  
16 L69 7ZB, United Kingdom.

17  
18 \*Corresponding authors.

19  
20 †All three authors have contributed equally and they wish to be considered as joint first  
21 authors.

22  
23 Dr. Ananth Prakash. European Molecular Biology Laboratory, European Bioinformatics  
24 Institute (EMBL-EBI), Wellcome Trust Genome Campus, Hinxton, Cambridge, CB10 1SD,  
25 UK. Phone: + 44 (0) 1223 492610. Email: [ananth@ebi.ac.uk](mailto:ananth@ebi.ac.uk)

26  
27 Dr. Juan Antonio Vizcaíno. European Molecular Biology Laboratory, European  
28 Bioinformatics Institute (EMBL-EBI), Wellcome Trust Genome Campus, Hinxton, Cambridge,  
29 CB10 1SD, UK. Phone: + 44 (0) 1223 492686. Email: [juan@ebi.ac.uk](mailto:juan@ebi.ac.uk).

30  
31

32

33 **Keywords**

34 Mass spectrometry, quantitative proteomics, comparative protein expression, public data

35 reuse, rat proteome, mouse proteome, PRIDE database

36 **Abstract**

37 The increasingly large amount of proteomics data in the public domain enables, among other  
38 applications, the combined analyses of datasets to create comparative protein expression  
39 maps covering different organisms and different biological conditions. Here we have  
40 reanalysed public proteomics datasets from mouse and rat tissues (14 and 9 datasets,  
41 respectively), to assess baseline protein abundance. Overall, the aggregated dataset contained  
42 23 individual datasets, including a total of 211 samples coming from 34 different tissues  
43 across 14 organs, comprising 9 mouse and 3 rat strains, respectively.

44

45 In all cases, we studied the distribution of canonical proteins between the different organs.  
46 The number of canonical proteins per dataset ranged from 273 (tendon) and 9,715 (liver) in  
47 mouse, and from 101 (tendon) and 6,130 (kidney) in rat. Then, we studied how protein  
48 abundances compared across different datasets and organs for both species. As a key point  
49 we carried out a comparative analysis of protein expression between mouse, rat and human  
50 tissues. We observed a high level of correlation of protein expression among orthologs  
51 between all three species in brain, kidney, heart and liver samples, whereas the correlation of  
52 protein expression was generally slightly lower between organs within the same species.  
53 Protein expression results have been integrated into the resource Expression Atlas for  
54 widespread dissemination.

55

56 **Author summary**

57

58 We have reanalysed 23 baseline mass spectrometry-based public proteomics datasets stored  
59 in the PRIDE database. Overall, the aggregated dataset contained 211 samples, coming from  
60 34 different tissues across 14 organs, comprising 9 mouse and 3 rat strains, respectively. We  
61 analysed the distribution of protein expression across organs in both species. We also studied  
62 how protein abundances compared across different datasets and organs for both species. Then  
63 we performed gene ontology and pathway enrichment analyses to identify enriched biological  
64 processes and pathways across organs. We also carried out a comparative analysis of baseline  
65 protein expression across mouse, rat and human tissues, observing a high level of expression  
66 correlation among orthologs in all three species, in brain, kidney, heart and liver samples. To  
67 disseminate these findings, we have integrated the protein expression results into the resource  
68 Expression Atlas.

## 69 1. Introduction

70

71 High-throughput mass spectrometry (MS)-based proteomics approaches have matured  
72 significantly in recent years, becoming an essential tool in biological research [1]. This has  
73 been the consequence of very significant technical improvements in MS instrumentation,  
74 chromatography, automation in sample preparation and computational analyses, among other  
75 areas. The most used MS-based experimental approach is Data Dependent Acquisition  
76 (DDA) bottom-up proteomics. Among the main quantitative proteomics DDA techniques,  
77 label-free intensity-based approaches remain very popular, although labelled-approaches,  
78 especially those techniques based on the isotopic labelling of peptides (MS<sup>2</sup> labelling), such  
79 as iTRAQ (Isobaric tag for relative and absolute quantitation) and TMT (Tandem Mass  
80 Tagging), are becoming increasingly used as well.

81

82 Following the steps initiated by genomics and transcriptomics, open data practices in the field  
83 have become embedded and commonplace in proteomics in recent years. In this context,  
84 datasets are now commonly available in the public domain to support the claims published in  
85 the corresponding manuscripts. The PRIDE database [2], located at the European  
86 Bioinformatics Institute (EBI), is currently the largest resource worldwide for public  
87 proteomics data deposition. PRIDE is also one of the founding members of the global  
88 ProteomeXchange consortium [3], involving five other resources, namely PeptideAtlas,  
89 MassIVE, iProX, jPOST and PanoramaPublic. ProteomeXchange has standardised data  
90 submission and dissemination of public proteomics data worldwide.

91

92 As a consequence, there is an unprecedented availability of data in the public domain, which  
93 is triggering multiple applications [4], including the joint reanalysis of datasets (so-called

94 meta-analysis studies) [5-7]. Indeed, public proteomics datasets can be systematically  
95 reanalysed and integrated e.g., to confirm the results reported in the original publications,  
96 potentially in a more robust manner since evidence can be strengthened if it is found  
97 consistently across different datasets. Potentially, new insights different to the aims of the  
98 original studies can also be obtained by reanalysing the datasets using different strategies, this  
99 includes repurposing of public datasets [8], including for instance approaches such as  
100 proteogenomics studies for genome annotation purposes [9-12].

101  
102 In this context of reuse of public proteomics data, PRIDE has started to work on developing  
103 data dissemination and integration pipelines into popular added-value resources at the EBI.  
104 This is perceived as a more sustainable approach in the medium-long term than setting up  
105 new independent bioinformatics resources. One of them is Expression Atlas [13], a resource  
106 that has enabled over the years easy access to gene expression data across species, tissues,  
107 cells, experimental conditions and diseases. Only recently, protein expression information  
108 coming from reanalysed datasets has been integrated in the ‘bulk’ section of Expression  
109 Atlas. As a result, proteomics expression data can be integrated with transcriptomics  
110 information, mostly coming from RNA-Seq experiments. So far, we have performed two  
111 meta-analysis studies involving the reanalysis and integration of: (i) 11 public quantitative  
112 datasets coming from cell lines and human tumour samples [13]; and (ii) 24 human baseline  
113 datasets coming from 31 different organs [14].

114  
115 The next logical step is to perform an analogous study of baseline protein expression in two  
116 of the main model organisms: *Mus musculus* and *Rattus norvegicus*. To date, there are only a  
117 small number of bioinformatics resources providing access to reanalysed MS-based  
118 quantitative proteomics datasets, and even fewer if one considers only mouse and rat data. In

119 this context, at the end of 2020, ProteomicsDB [15] released a first version of the mouse  
120 proteome, based on the reanalysis of five label-free datasets. To the best of our knowledge,  
121 there is no such public resource storing accurate MS-derived data for rat data yet. PaxDB is a  
122 resource [16] that provides protein expression information coming from many species  
123 (including mouse and rat) but the reported data relies on spectral counting, a technique that  
124 generally does not provide the same level of accuracy than intensity-based label-free  
125 approaches. Additionally, although antibody-based human protein expression information is  
126 provided *via* the Human Protein Atlas [17], their efforts are focused on human protein  
127 expression.

128

129 Here, we report the reanalysis and integration of 23 public mouse (14 datasets) and rat (9  
130 datasets) label-free datasets, and the incorporation of the results into the resource Expression  
131 Atlas as baseline studies. Additionally, we report a comparative analysis of protein  
132 expression across mouse, rat and human (in this case using the results reported at [14] using  
133 the same methodology).

134

## 135 2. Results

136

### 137 2.1. Baseline proteomics datasets

138 Overall, we quantified protein expression from 34 healthy tissues in 14 organs coming from  
139 23 datasets. The analyses covered a total of 1,173 MS runs from 211 samples that were  
140 annotated as healthy/control/non-treated samples, thus representing baseline protein  
141 expression. Non-control/disease samples associated with these datasets were also reanalysed  
142 but are not discussed here. Normalised protein abundances values (as ppb, parts per billion,  
143 see Methods for calculation) from both control/healthy/non-treated and disease/treated tissue  
144 samples are available to view as heatmaps in Expression Atlas. The protein abundances along  
145 with sample annotations, sample quality assessment summary and experimental parameter  
146 inputs for MaxQuant can be downloaded from Expression Atlas as text files. A summary of  
147 the data selection and reanalysis protocols is shown in Fig. 1. The total number of peptides  
148 and proteins identified in these datasets are shown in Table 1.

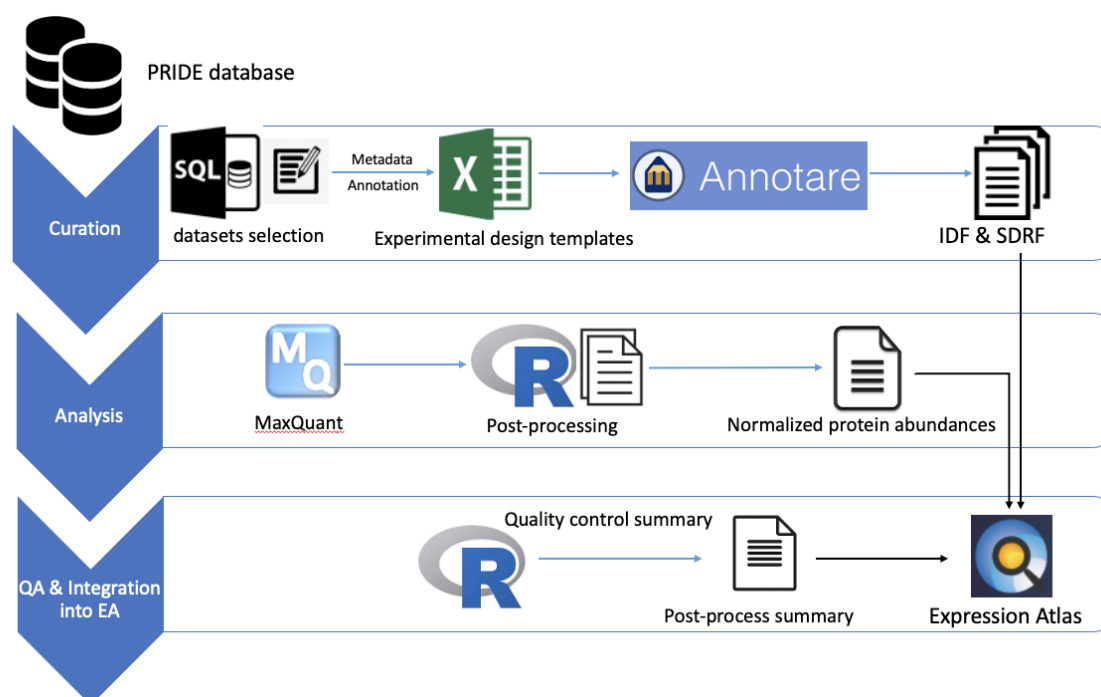

149

150 **Figure 1.** An overview of the study design and reanalysis pipeline. QA: Quality assessment.



| Expression Atlas accession numbers | PRIDE dataset identifiers | Tissues                                                     | Organs                                                      | Species             | Strains                         | Fractionation | Number of MS runs | Number of samples | Number of protein groups <sup>†</sup> | Number of peptides <sup>†</sup> | Number of unique peptides <sup>†</sup> | Number of unique genes mapped <sup>†</sup> |
|------------------------------------|---------------------------|-------------------------------------------------------------|-------------------------------------------------------------|---------------------|---------------------------------|---------------|-------------------|-------------------|---------------------------------------|---------------------------------|----------------------------------------|--------------------------------------------|
| E-PROT-7 <sup>§</sup>              | PXD000867 <sup>[18]</sup> | Liver                                                       | Liver                                                       | <i>Mus musculus</i> | C57BL/6J                        | Yes           | 24                | 4                 | 12,792                                | 246,738                         | 167,725                                | 9,715                                      |
| E-PROT-10 <sup>§</sup>             | PXD000288 <sup>[19]</sup> | Triceps muscles                                             | Triceps Muscles                                             | <i>Mus musculus</i> | C57BL/6                         | Yes           | 36                | 3                 | 10,870                                | 189,553                         | 126,670                                | 6,421                                      |
| E-PROT-16                          | PXD003155 <sup>[20]</sup> | Cerebellum, Liver                                           | Brain, Liver                                                | <i>Mus musculus</i> | C57BL/6                         | No            | 24                | 12                | 4,508                                 | 59,696                          | 45,728                                 | 3,797                                      |
| E-PROT-74                          | PXD004612 <sup>[21]</sup> | Achilles and Plantaris tendon                               | Tendon                                                      | <i>Mus musculus</i> | C57BL/6                         | No            | 8                 | 8                 | 457                                   | 6,643                           | 3,271                                  | 273                                        |
| E-PROT-75                          | PXD005230 <sup>[22]</sup> | Hippocampus, Cerebellum, Cortex                             | Brain                                                       | <i>Mus musculus</i> | C57BL/10J                       | Yes           | 72                | 36                | 7,663                                 | 63,479                          | 41,683                                 | 6,037                                      |
| E-PROT-76                          | PXD009909 <sup>[23]</sup> | Retina                                                      | Eye                                                         | <i>Mus musculus</i> | ND4 Swiss Webster               | Yes           | 12                | 1                 | 5,002                                 | 29,454                          | 24,961                                 | 3,686                                      |
| E-PROT-77                          | PXD012307 <sup>[24]</sup> | Lung                                                        | Lung                                                        | <i>Mus musculus</i> | C57BL/6                         | No            | 32                | 2                 | 6,809                                 | 106,391                         | 73,950                                 | 5,795                                      |
| E-PROT-78                          | PXD009639 <sup>[25]</sup> | Lens                                                        | Eye                                                         | <i>Mus musculus</i> | CD1                             | Yes           | 10                | 1                 | 4,519                                 | 20,779                          | 18,006                                 | 3,064                                      |
| E-PROT-79                          | PXD019394 <sup>[26]</sup> | Heart, Kidney, Liver, Lung, Brain, Spleen, Testis, Pancreas | Heart, Kidney, Liver, Lung, Brain, Spleen, Testis, Pancreas | <i>Mus musculus</i> | Swiss-Webster                   | Yes           | 96                | 8                 | 9,853                                 | 141,506                         | 105,701                                | 8,185                                      |
| E-PROT-81                          | PXD012636 <sup>[27]</sup> | Left atrium, Left ventricle, Right atrium, Right ventricle  | Heart                                                       | <i>Mus musculus</i> | C57BL/6                         | Yes           | 120               | 4                 | 7,772                                 | 146,966                         | 99,577                                 | 6,435                                      |
| E-PROT-82                          | PXD019431 <sup>[28]</sup> | Articular cartilage                                         | Articular cartilage                                         | <i>Mus musculus</i> | BALB\ c                         | No            | 72                | 6                 | 1,815                                 | 17,695                          | 15,191                                 | 1,518                                      |
| E-PROT-83                          | PXD022614 <sup>[29]</sup> | Brain                                                       | Brain                                                       | <i>Mus musculus</i> | C57BL/6J: Rj<br>C57BL/6JR ccHsd | Yes           | 120               | 6                 | 6,645                                 | 97,443                          | 69,884                                 | 5,673                                      |

|                        |                           |                                                                                                                                                                                                                                                                                                               |        |                          |                |     |     |    |       |         |        |       |
|------------------------|---------------------------|---------------------------------------------------------------------------------------------------------------------------------------------------------------------------------------------------------------------------------------------------------------------------------------------------------------|--------|--------------------------|----------------|-----|-----|----|-------|---------|--------|-------|
| E-PROT-84              | PXD004496 <sup>[30]</sup> | Hippocampus                                                                                                                                                                                                                                                                                                   | Brain  | <i>Mus musculus</i>      | C57BL/6J       | Yes | 204 | 17 | 4,192 | 37,363  | 30,100 | 3,424 |
| E-PROT-85              | PXD008736 <sup>[31]</sup> | Right atrium, Sinus node                                                                                                                                                                                                                                                                                      | Heart  | <i>Mus musculus</i>      | C57BL/6J       | Yes | 143 | 6  | 7,906 | 144,926 | 94,379 | 6,554 |
| E-PROT-86 <sup>§</sup> | PXD012677 <sup>[32]</sup> | Amygdala                                                                                                                                                                                                                                                                                                      | Brain  | <i>Rattus norvegicus</i> | Sprague Dawley | No  | 3   | 3  | 1,872 | 15,326  | 12,367 | 1,382 |
| E-PROT-87 <sup>§</sup> | PXD006692 <sup>[33]</sup> | Lung                                                                                                                                                                                                                                                                                                          | Lung   | <i>Rattus norvegicus</i> | Sprague Dawley | No  | 10  | 10 | 2,079 | 14,440  | 11,696 | 1,398 |
| E-PROT-88 <sup>§</sup> | PXD016793 <sup>[34]</sup> | Liver                                                                                                                                                                                                                                                                                                         | Liver  | <i>Rattus norvegicus</i> | Sprague Dawley | No  | 8   | 8  | 4,787 | 57,998  | 46,411 | 3,743 |
| E-PROT-89 <sup>§</sup> | PXD004364 <sup>[35]</sup> | Testis                                                                                                                                                                                                                                                                                                        | Testis | <i>Rattus norvegicus</i> | Sprague Dawley | No  | 3   | 3  | 2,351 | 15,880  | 13,674 | 1,601 |
| E-PROT-91              | PXD001839 <sup>[36]</sup> | Left ventricle                                                                                                                                                                                                                                                                                                | Heart  | <i>Rattus norvegicus</i> | F344/BN        | No  | 12  | 12 | 1,345 | 10,310  | 8,804  | 925   |
| E-PROT-92 <sup>§</sup> | PXD013543 <sup>[37]</sup> | Left ventricle                                                                                                                                                                                                                                                                                                | Heart  | <i>Rattus norvegicus</i> | Wistar         | No  | 8   | 8  | 1,858 | 17,303  | 13,622 | 1,340 |
| E-PROT-93              | PXD016958 <sup>[38]</sup> | First segment of proximal tubule, second segment of proximal tubule, third segment of proximal tubule, medullary thick ascending limb, cortical thick ascending limb, distal convoluted tubule, connecting tubule, cortical collecting duct, outer medullary collecting duct, inner medullary collecting duct | Kidney | <i>Rattus norvegicus</i> | Sprague Dawley | Yes | 132 | 32 | 7,846 | 103,886 | 83,662 | 6,130 |

|                        |                                 |                                            |                               |                          |        |     |                                      |                                   |       |        |        |       |
|------------------------|---------------------------------|--------------------------------------------|-------------------------------|--------------------------|--------|-----|--------------------------------------|-----------------------------------|-------|--------|--------|-------|
| E-PROT-94              | PXD003375 <sup>[39]</sup>       | Caudal and rostral segments of spinal cord | Spinal cord                   | <i>Rattus norvegicus</i> | Wistar | Yes | 21                                   | 18                                | 2,477 | 29,213 | 22,025 | 1,926 |
| E-PROT-95 <sup>§</sup> | PXD015928 <sup>[40]</sup>       | Tendon                                     | Tendon                        | <i>Rattus norvegicus</i> | Wistar | No  | 3                                    | 3                                 | 199   | 1,253  | 1,063  | 101   |
| <b>TOTAL</b>           | 23 datasets (Mouse: 14, Rat: 9) | 34 tissues (Mouse: 21, Rat: 18)            | 14 organs (Mouse: 12, Rat: 8) |                          |        |     | 1,173 MS runs (Mouse: 973, Rat: 200) | 211 samples (Mouse: 114, Rat: 97) |       |        |        |       |

151

152

153 **Table 1.** List of mouse and rat proteomics datasets that were reanalysed. <sup>§</sup>Only normal/untreated samples within this dataset are reported in this

154 study. However, results from both normal and disease samples are available in Expression Atlas. † Numbers after post-processing.

## 155 **2.2. Protein coverage across organs and datasets**

156 One of our main aims was to study protein expression across various organs. To enable a  
157 simpler comparison [14] we first grouped 34 different tissues into 14 distinct organs, as  
158 discussed in ‘Methods’. We defined ‘tissue’ as a distinct functional or structural region within  
159 an ‘organ’. We estimated the number of ‘canonical proteins’ identified across organs by first  
160 mapping all members of each protein group to their respective parent genes. We defined the  
161 parent gene as equivalent to the UniProt ‘canonical protein’ and we will denote the term  
162 ‘protein abundance’ to mean ‘canonical protein abundance’ from here on in the manuscript.

163

### 164 **2.2.1. Mouse proteome**

165 A total of 21,274 protein groups were identified from mouse datasets, among which 8,176  
166 protein groups (38.4%) were uniquely present in only one organ and 70 protein groups  
167 (0.3%) were ubiquitously observed (see the full list in Supplementary File 2). This does not  
168 imply that these proteins are unique to these organs. Merely, this is the outcome considering  
169 the selected datasets. Mouse protein groups were mapped to 12,570 genes (canonical  
170 proteins) (Supplementary File 3). We detected the largest number of canonical proteins in  
171 samples coming from liver (9,920, 78.9% of the total) and the lowest numbers in samples  
172 from tendon (273, 2.2%) and articular cartilage (1,519, 12.1%) (Fig. 2A). In the case of  
173 tendon and articular cartilage, both experiments did not include sample fractionation in their  
174 sample preparation methodology, which can also explain the lower number of detected  
175 proteins. The comparatively even lower number of proteins identified in tendon could be  
176 attributed to the smallest sample size (only one sample out of 114, 0.9%). Also, tendon is a  
177 relatively hypocellular tissue, which has a low protein turnover rate. Dataset PXD000867,  
178 containing mouse liver samples, had the highest number of canonical proteins detected

179 (9,715, 77.3%), while the smallest number of proteins was detected in dataset PXD004612  
180 (tendon, 273, 2.2%), as highlighted above (Fig. 2C).

181  
182 We studied the normalised protein abundance distribution in organs (Fig. 2B) and found that  
183 all organs, except tendon, had similar median abundances. However, one cannot attribute  
184 further biological meaning to these observations, since by definition the method of  
185 normalisation fixes each sample to have the same “total abundance”, which then gets shared  
186 out amongst all proteins. The normalised protein abundance distribution in datasets indicated  
187 a higher than median abundances detected in datasets PXD004612 (tendon) and PXD003164  
188 (testis) (Fig. 2D). A linear relationship was observed between the number of canonical  
189 proteins detected in datasets and organs, when compared to the relative amount of their  
190 spectral data (Fig. 2E). We found a significant number of proteins uniquely detected in one  
191 organ (Fig. 2F). However, the list of concrete canonical proteins that were detected in just  
192 one organ should be taken with caution since the list is subjected to inflated False Discovery  
193 Rate (FDR), due to the accumulation of false positives when analysing the datasets  
194 separately.

195 Some of the organs (liver, heart and brain) were represented across multiple mouse studies in  
196 the aggregated dataset. A pairwise comparison of protein abundances in these organs  
197 generally showed a good correlation in expression (heart:  $R^2$  values ranged from 0.54 to 0.83;  
198 brain:  $R^2$  from 0.28 to 0.72; and liver:  $R^2$  from 0.59 to 0.74) (Figure S1 in Supplementary File  
199 4).

200

201

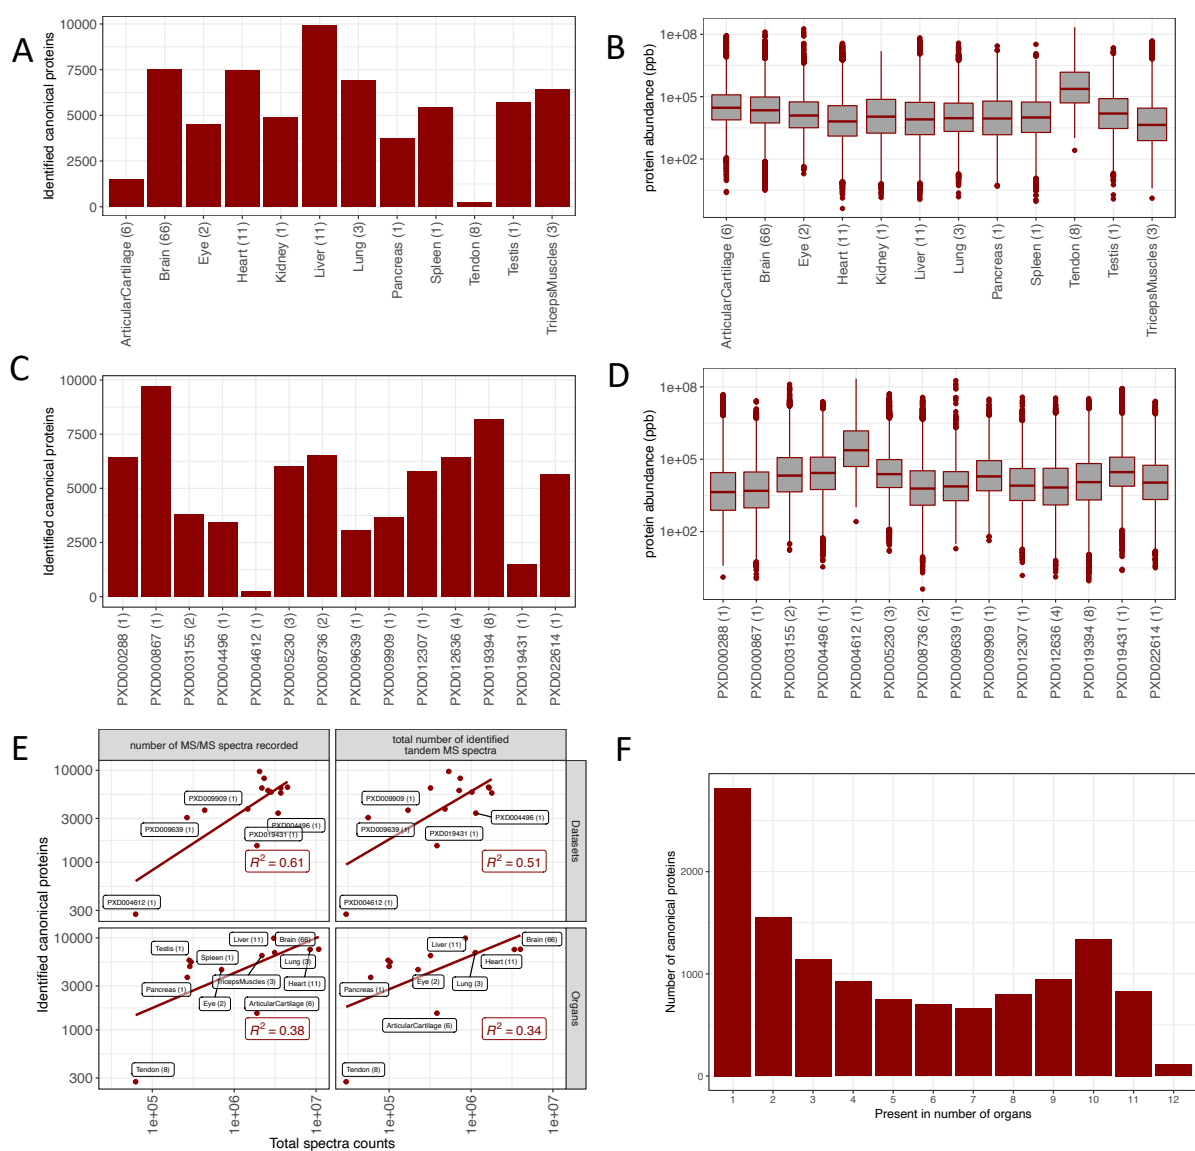

202

203 **Figure 2.** (A) Number of canonical proteins identified across different mouse organs. The  
 204 number within the parenthesis indicates the number of samples. (B) Range of normalised  
 205 iBAQ protein abundances across different organs. The number within the parenthesis  
 206 indicates the number of samples. (C) Canonical proteins identified across different datasets.  
 207 The number within the parenthesis indicate the number of unique tissues in the dataset. (D)  
 208 Range of normalised iBAQ protein abundances across different datasets. The number within  
 209 parenthesis indicate the number of unique tissues in the dataset. (E) Comparison of total  
 210 spectral data with the number of canonical proteins identified in each dataset and organ. (F)  
 211 Distribution of canonical proteins identified across organs.

212

### 213 **2.2.2. Rat proteome**

214 A total of 7,769 protein groups were identified across 8 different rat organs among which  
215 3,649 (46.9%) protein groups were unique to one specific organ while 13 (0.16%) protein  
216 groups were present among all organs (see full list in Supplementary File 2). The protein  
217 groups were mapped to 7,116 genes (canonical proteins) (Supplementary File 3). The highest  
218 number of canonical proteins (6,106, 85.1%) was found in rat kidney samples. The lowest  
219 number of canonical proteins (101, 1.4%) was found in samples from tendon, as shown in  
220 Fig. 3A. The largest number of canonical proteins identified in kidney is likely because of the  
221 relatively large number of samples (32 samples), when compared to other organs. However, it  
222 is interesting to note that large numbers of canonical proteins were detected in liver samples,  
223 which relatively had fewer number of samples, when compared to the total number of  
224 samples in heart and spinal cord.

225

226 Datasets PXD016958 and PXD016793 consisted entirely of kidney (where fractionation was  
227 performed) and liver (no fractionation) samples, respectively, and as mentioned above had  
228 the largest number of canonical proteins identified (Fig. 3C). The normalised protein  
229 abundances were similar among the various organs and datasets (Fig. 3B, D). We also  
230 observed a linear relation between the number of canonical proteins identified and the MS  
231 spectra identified (Fig. 3E). As seen in the mouse datasets, we also observed a large number  
232 of proteins uniquely detected in one organ (Fig. 3F). As highlighted above, the list of  
233 concrete canonical proteins that were detected in just one organ should be taken with caution  
234 since the list is subjected to inflated False Discovery Rate (FDR).

235 In the case of rat datasets, left ventricle heart samples were the only ones represented in more  
236 than one study (PXD001839 and PXD013543) in the aggregated dataset. A pairwise

237 comparison of protein abundances of heart between these two datasets was performed,  
 238 showing a strong correlation in protein expression ( $R^2 = 0.9$ ) (Figure S1D in Supplementary  
 239 File 4).  
 240

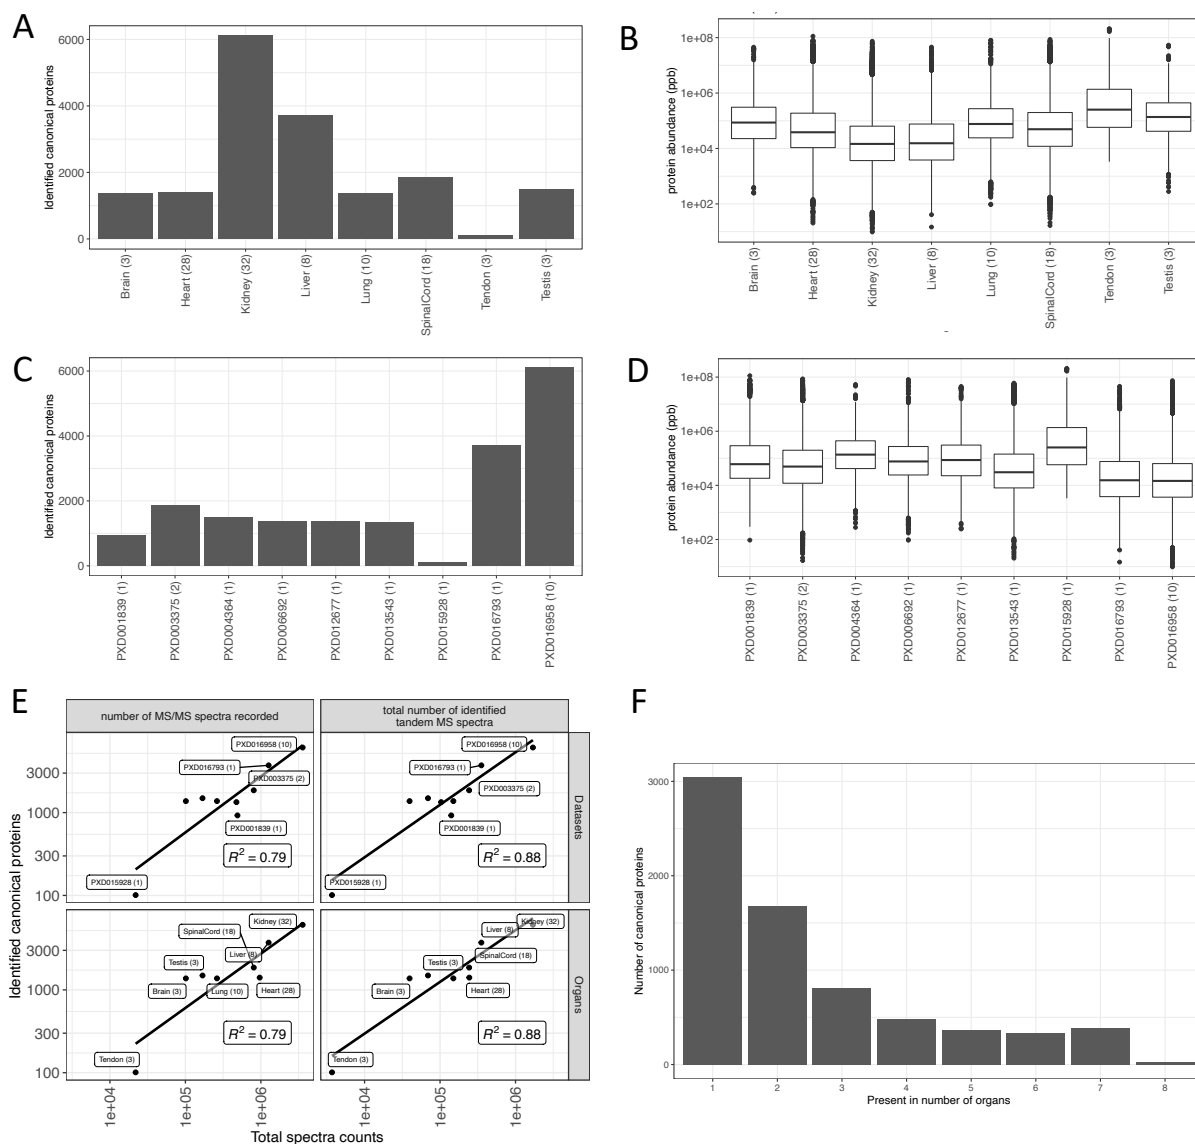

241  
 242 **Figure 3.** (A) Number of canonical proteins identified across different rat organs. The  
 243 number within the parenthesis indicates the number of samples. (B) Range of normalised  
 244 iBAQ protein abundances across different organs. The number within the parenthesis  
 245 indicates the number of samples. (C) Canonical proteins identified across different datasets.  
 246 The number within the parenthesis indicate the number of unique tissues in the dataset. (D)



247 Range of normalised iBAQ protein abundances across different datasets. The number within  
248 parenthesis indicate the number of unique tissues in the dataset. (E) Comparison of total  
249 spectral data with the number of canonical proteins identified in each dataset and organ. (F)  
250 Distribution of canonical proteins identified across organs.

251

### 252 **2.3. Protein abundance comparison across organs**

253 Next, we studied how protein abundances compared across different datasets and organs. The  
254 presence of batch effects between datasets makes this type of comparisons challenging. To  
255 aid comparison of protein abundances between datasets we transformed the normalised iBAQ  
256 intensities into ranked bins as explained in ‘Methods’, i.e., proteins included in bin 5 are  
257 highly abundant whereas proteins in bin 1 are expressed in the lowest abundances (among the  
258 detected proteins).

259

#### 260 **2.3.1. Mouse proteome**

261 We found that 1,086 (8.6%) proteins were found with their highest level of expression in at  
262 least 3 organs, with a median bin value greater than 4 (Supplementary File 3). On the other  
263 end of the scale, 138 (1.1%) canonical proteins were found with their lowest expression in at  
264 least 3 organs, with a median bin value of less than 2. The bin transformed abundances in all  
265 organs are provided in Supplementary File 3.

266

267 To compare protein expression across all organs, we calculated pairwise Pearson correlation  
268 coefficients across 117 samples (Fig. 4A). We observed some correlation in protein  
269 expression within brain (median  $R^2 = 0.31$ ) and a higher one in heart (median  $R^2 = 0.67$ )  
270 samples. We performed Principal Component Analysis (PCA) on all samples from mouse  
271 datasets for testing the effectiveness of the bin transformation method in reducing batch

272 effects. Fig. 4B shows the clustering of samples from various organs of mouse. We observed  
 273 samples from the same organ generally clustered together. For example, we observed that  
 274 brain samples all clustered together in one group, even though they come from different  
 275 datasets, indicating decent removal of batch effects (Fig. 4C). However, we also observed  
 276 that samples from other organs such as liver did not cluster according to their organ types but  
 277 clustered together within the dataset they were part of, indicating some residual batch effects,  
 278 which are hard to remove completely.  
 279

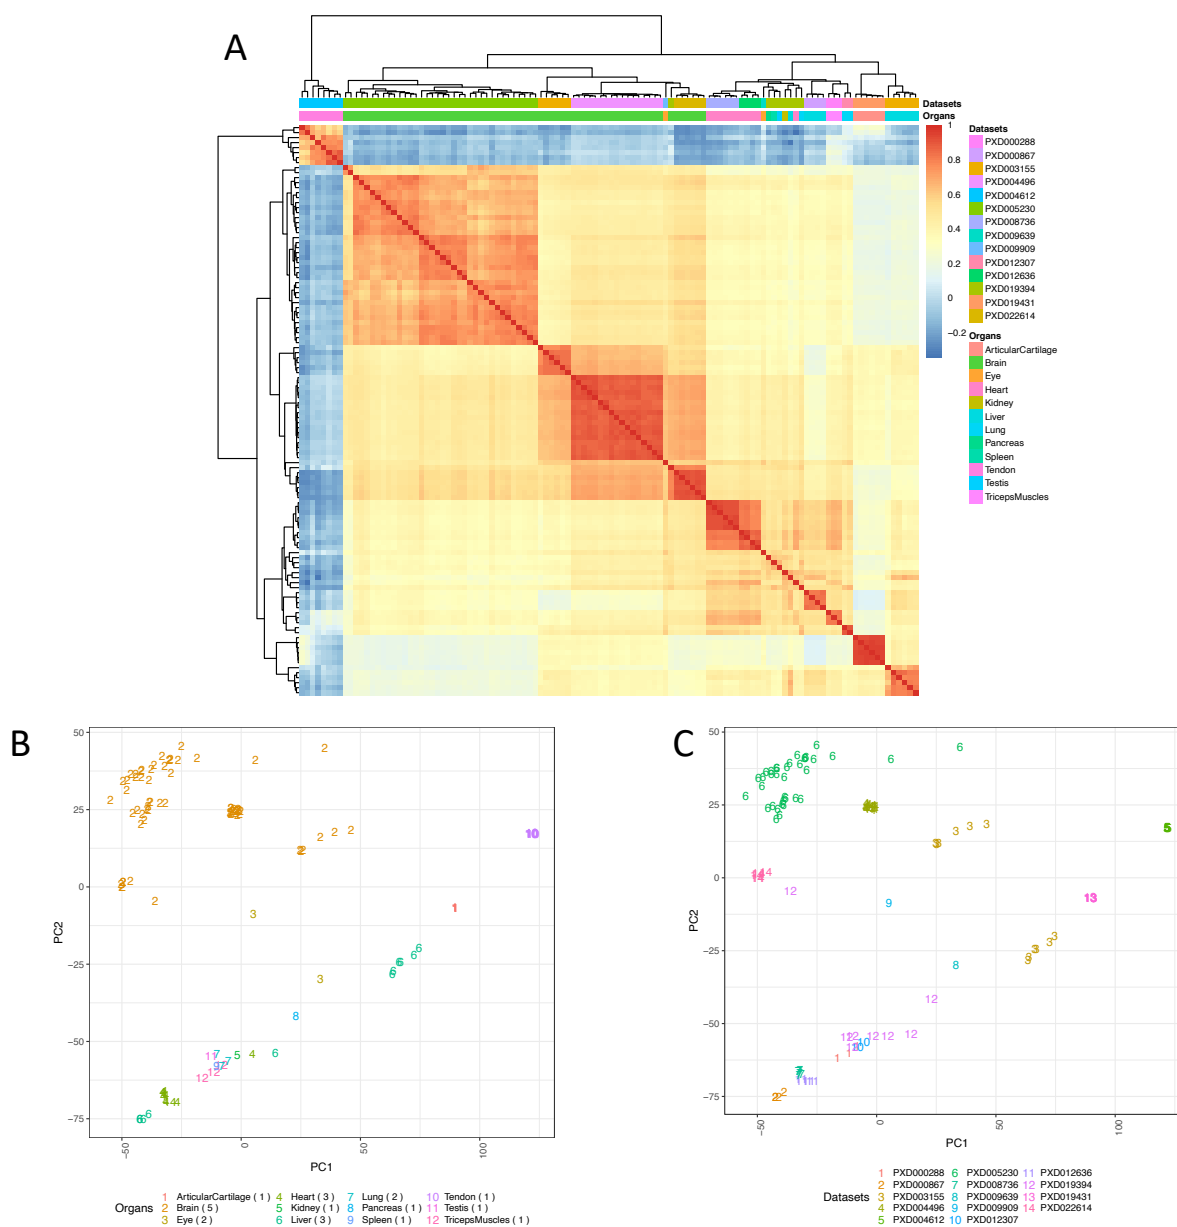

280

281 **Figure 4.** (A) Heatmap of pairwise Pearson correlation coefficients across all mouse samples.  
282 The colour represents the correlation coefficient and was calculated using the bin transformed  
283 iBAQ values. The samples were hierarchically clustered on columns and rows using  
284 Euclidean distances. (B) PCA of all samples, using the binned protein abundances as input,  
285 coloured by the organ types. (C) PCA of all samples coloured by their respective dataset  
286 identifiers. The numbers in parenthesis indicate the number of datasets for each organ.  
287 Binned values of canonical proteins quantified in at least 50% of the samples were used to  
288 perform the PCA.

289

290 In addition, we compared the protein abundances generated in this study with the data  
291 available in the resource PaxDB generated using spectral counting across different mouse  
292 organs. We observed generally a strong correlation of protein abundances calculated using  
293 iBAQ from this study (fraction of total (FOT) normalised ppb) and spectral counting methods  
294 (Figure S2 in Supplementary File 4). However, the expression of low abundant proteins  
295 seemed to be underestimated in PaxDB when compared with our results, as shown by a S-  
296 shaped curve in the scatterplot in organs such as brain, heart, liver and lung. The ‘dynamic  
297 exclusion’ [41] setting used by modern mass spectrometers prevents the instrument from  
298 fragmenting abundant peptides multiple times when they are repeatedly observed in scans  
299 nearby in time. This has the effect that spectral counting approaches will limit the dynamic  
300 range observed, as high abundant proteins will be under sampled. This is a limitation when  
301 using spectral counting methods, and these days spectral counting is not commonly used as a  
302 truly quantitative data type in proteomics.

303

304 **2.3.2. Rat proteome**

305 Next, we studied the distribution of protein abundances across organs in rat. On one hand,  
306 311 (4.3%) proteins were found with their highest expression in at least 3 organs with a  
307 median bin value greater than 4. On the other hand, 27 (0.37%) canonical proteins were  
308 found with their lowest expression in at least 3 organs, with a median bin value of less than 2.  
309 The bin transformed abundances in all organs are provided in Supplementary File 3.  
310 Overall, the samples from rat datasets showed a better correlation in protein expression (Fig.  
311 5A) than in the case of mouse. We observed generally a strong correlation of protein  
312 expression within samples from liver (median Pearson's correlation  $R^2 = 0.85$ ), lung (median  
313  $R^2 = 0.71$ ), spinal cord (median  $R^2 = 0.65$ ), heart (median  $R^2 = 0.71$ ) and brain (median  $R^2 =$   
314  $0.86$ ). We also observed the clustering in the PCA of samples coming from the same organ  
315 (Fig. 5B). Kidney, lung, spinal cord and heart samples all clustered together according to  
316 their organ type. Fig. 5C shows the samples based on the dataset they were part of. However,  
317 most organ samples were part of individual datasets except in the case of samples from heart,  
318 which came from two datasets (PXD001839 and PXD013543). Fig. 5C shows that the heart  
319 samples clustered into two nearby groups (bottom left two clusters on Fig. 5B and 5C),  
320 wherein each cluster included samples from a different dataset, indicating the presence of  
321 small batch effects.

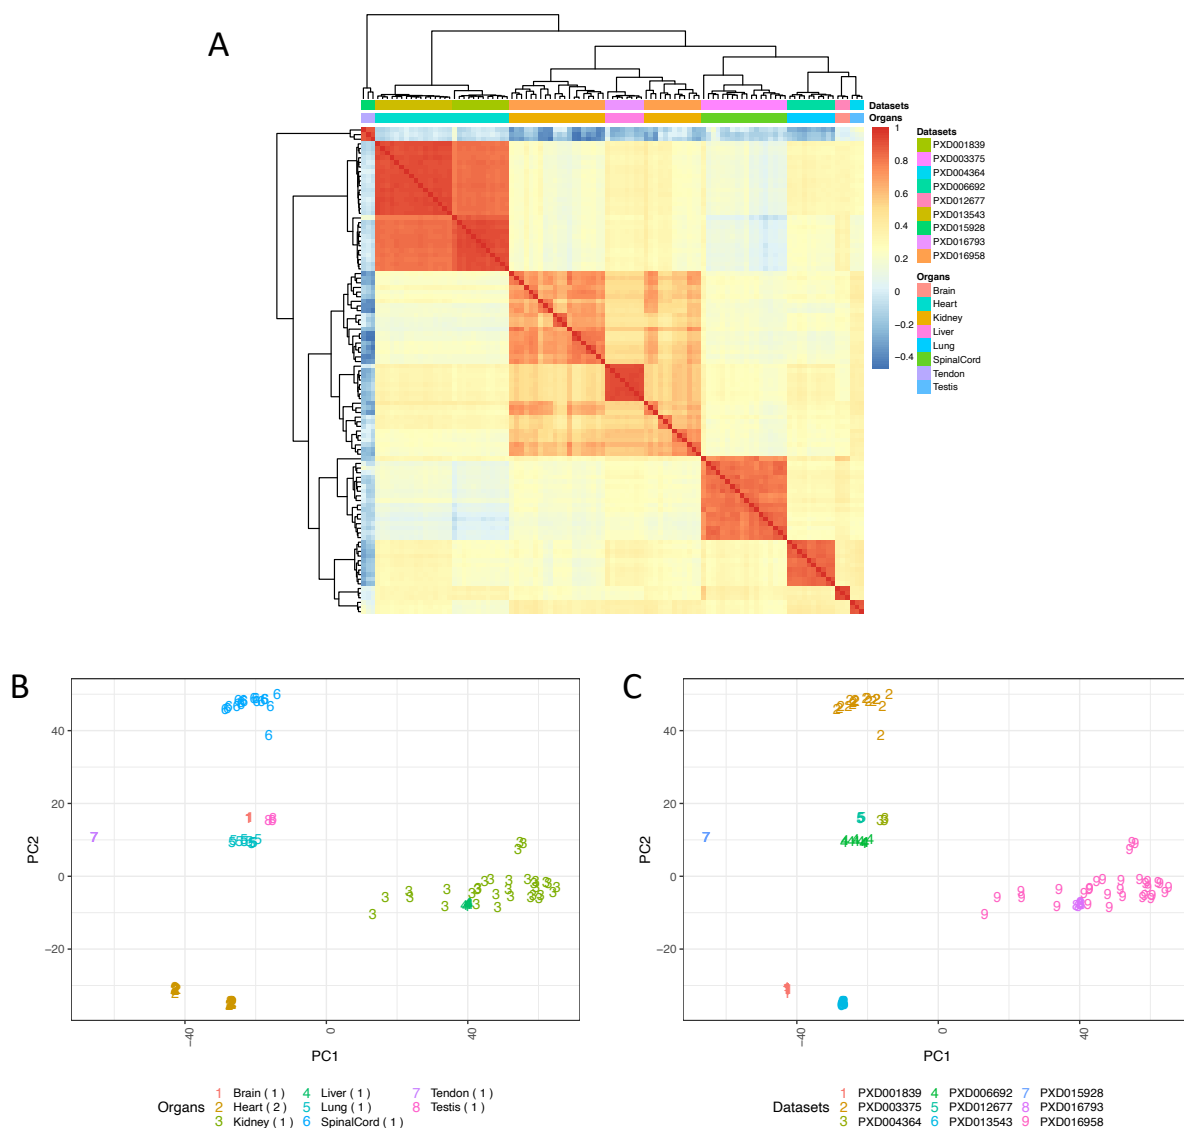

322

323 **Figure 5.** (A) Heatmap of pairwise Pearson correlation coefficients across all rat samples.

324 The colour represents the correlation coefficient and was calculated using the bin transformed

325 iBAQ values. The samples were hierarchically clustered on columns and rows using

326 Euclidean distances. (B) PCA of all samples coloured by the organ types. (C) PCA of all

327 samples coloured by their respective dataset identifiers. The numbers in parenthesis indicate

328 the number of datasets for each organ. Binned values of canonical proteins quantified in at

329 least 50% of the samples were used to perform the PCA.

330

331 **2.4. The organ elevated proteome and the over-representative biological processes**

332 Based on their expression, canonical proteins were classified into three different groups based  
 333 on their organ specificity: “mixed”, “group-enriched” and “organ-enriched” (see  
 334 Supplementary File 5). We considered over-expressed canonical proteins in each organ as  
 335 those which were in “group-enriched” and “organ-enriched”. The analysis showed that on  
 336 average, 20.8% and 26.0% of the total elevated canonical proteins were organ group-specific  
 337 in mouse and rat, respectively (Fig. 6). In addition, 4.3% and 14.2% were unique organ-  
 338 enriched in mouse and rat, respectively. The highest ratio of organ-enriched in mouse was  
 339 found in liver (13.6%), whereas in rat, it was found in kidney (39.8%).

340 We then performed a gene ontology (GO) enrichment analysis of those proteins that were  
 341 'organ-enriched' and group-enriched' using GO terms associated with biological processes.  
 342 We found 1,036 GO terms to be statistically significant in all organs, as seen in  
 343 Supplementary File 6. The most significant GO terms for each organ are shown in Table 2.

344

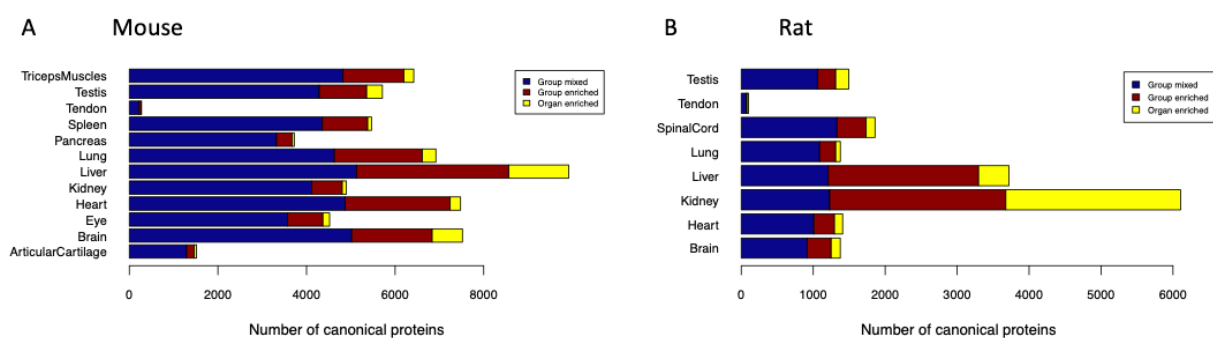

345

346 **Figure 6.** Organ specificity of canonical proteins in (A) mouse and (B) rat.

347

| Organ               | Species             | GO ID      | Description                                   | adjusted p-value       |
|---------------------|---------------------|------------|-----------------------------------------------|------------------------|
| Articular cartilage | <i>Mus musculus</i> | GO:0030198 | Extracellular matrix organization             | $8.94 \times 10^{-38}$ |
|                     |                     | GO:0043062 | Extracellular structure organization          | $8.94 \times 10^{-38}$ |
|                     |                     | GO:0045229 | External encapsulating structure organization | $8.94 \times 10^{-38}$ |
| Brain               | <i>Mus musculus</i> | GO:0050804 | Modulation of chemical synaptic transmission  | $7.03 \times 10^{-65}$ |
|                     |                     | GO:0099177 | Regulation of trans-synaptic signalling       | $7.03 \times 10^{-65}$ |
|                     |                     | GO:0050808 | Synapse organization                          | $1.41 \times 10^{-48}$ |

|                        |                          |                                        |                                                                                                      |                                                                            |
|------------------------|--------------------------|----------------------------------------|------------------------------------------------------------------------------------------------------|----------------------------------------------------------------------------|
| <b>Heart</b>           | <i>Mus musculus</i>      | GO:0060047<br>GO:0008016<br>GO:0060537 | Heart contraction<br>Regulation of heart contraction<br>Muscle tissue development                    | 7.10*10 <sup>-11</sup><br>4.43*10 <sup>-10</sup><br>6.16*10 <sup>-10</sup> |
| <b>Kidney</b>          | <i>Mus musculus</i>      | GO:0015711<br>GO:0044282<br>GO:0016054 | Organic anion transport<br>Small molecule catabolic process<br>Organic acid catabolic process        | 4.59*10 <sup>-19</sup><br>4.91*10 <sup>-15</sup><br>6.25*10 <sup>-15</sup> |
| <b>Eye</b>             | <i>Mus musculus</i>      | GO:0007601<br>GO:0001654<br>GO:0099504 | Visual perception<br>Eye development<br>Synaptic vesicle cycle                                       | 7.54*10 <sup>-50</sup><br>5.31*10 <sup>-31</sup><br>8.36*10 <sup>-18</sup> |
| <b>Liver</b>           | <i>Mus musculus</i>      | GO:0016569<br>GO:0016570<br>GO:0019369 | Covalent chromatin modification<br>Histone modification<br>Arachidonic acid metabolic process        | 6.26*10 <sup>-10</sup><br>1.71*10 <sup>-08</sup><br>1.71*10 <sup>-08</sup> |
| <b>Lung</b>            | <i>Mus musculus</i>      | GO:0120031<br>GO:0030031<br>GO:0044782 | Plasma membrane bounded cell projection assembly<br>Cell projection assembly<br>Cilium organization  | 3.61*10 <sup>-14</sup><br>3.61*10 <sup>-14</sup><br>9.83*10 <sup>-14</sup> |
| <b>Pancreas</b>        | <i>Mus musculus</i>      | GO:0007586<br>GO:0032328               | Digestion<br>Alanine transport                                                                       | 0.005<br>0.018                                                             |
| <b>Spleen</b>          | <i>Mus musculus</i>      | GO:0046649<br>GO:0050776<br>GO:0045087 | Lymphocyte activation<br>Regulation of immune response<br>Innate immune response                     | 4.12*10 <sup>-22</sup><br>2.00*10 <sup>-20</sup><br>2.23*10 <sup>-20</sup> |
| <b>Tendon</b>          | <i>Mus musculus</i>      | GO:0003012<br>GO:0050879<br>GO:0050881 | Muscle system process<br>Multicellular organismal movement<br>Musculoskeletal movement               | 1.46*10 <sup>-25</sup><br>3.14*10 <sup>-19</sup><br>1.46*10 <sup>-25</sup> |
| <b>Testis</b>          | <i>Mus musculus</i>      | GO:0048232<br>GO:0003341<br>GO:0044782 | Male gamete generation<br>Cilium movement<br>Cilium organization                                     | 8.75*10 <sup>-49</sup><br>3.04*10 <sup>-38</sup><br>6.78*10 <sup>-37</sup> |
| <b>Triceps muscles</b> | <i>Mus musculus</i>      | GO:0061061<br>GO:0055002<br>GO:0003009 | Muscle structure development<br>Striated muscle cell development<br>Skeletal muscle contraction      | 1.56*10 <sup>-14</sup><br>2.41*10 <sup>-14</sup><br>3.53*10 <sup>-14</sup> |
| <b>Brain</b>           | <i>Rattus norvegicus</i> | GO:0099537<br>GO:0007268<br>GO:0098916 | Trans-synaptic signalling<br>Chemical synaptic transmission<br>Anterograde trans-synaptic signalling | 1.79*10 <sup>-60</sup><br>1.79*10 <sup>-60</sup><br>1.79*10 <sup>-60</sup> |
| <b>Heart</b>           | <i>Rattus norvegicus</i> | GO:0061061<br>GO:0003012<br>GO:0055001 | Muscle structure development<br>Muscle system process<br>Muscle cell development                     | 2.94*10 <sup>-17</sup><br>6.30*10 <sup>-16</sup><br>4.00*10 <sup>-15</sup> |
| <b>Kidney</b>          | <i>Rattus norvegicus</i> | GO:0006396<br>GO:0045944<br>GO:0006260 | RNA processing<br>positive regulation of transcription by RNA polymerase II<br>DNA replication       | 6.19*10 <sup>-13</sup><br>7.29*10 <sup>-06</sup><br>1.74*10 <sup>-05</sup> |
| <b>Liver</b>           | <i>Rattus norvegicus</i> | GO:0008202<br>GO:0016054<br>GO:0032787 | Steroid metabolic process<br>Organic acid catabolic process<br>Monocarboxylic acid metabolic process | 2.74*10 <sup>-10</sup><br>1.61*10 <sup>-09</sup><br>1.64*10 <sup>-09</sup> |
| <b>Lung</b>            | <i>Rattus norvegicus</i> | GO:0031589<br>GO:0009617<br>GO:0030036 | Cell-substrate adhesion<br>Response to bacterium<br>Actin cytoskeleton organization                  | 7.62*10 <sup>-08</sup><br>7.62*10 <sup>-08</sup><br>1.40*10 <sup>-07</sup> |
| <b>Spinal cord</b>     | <i>Rattus norvegicus</i> | GO:0061564<br>GO:0099537<br>GO:0007268 | Axon development<br>Trans-synaptic signalling<br>Chemical synaptic transmission                      | 4.26*10 <sup>-18</sup><br>5.93*10 <sup>-16</sup><br>5.93*10 <sup>-16</sup> |
| <b>Tendon</b>          | <i>Rattus norvegicus</i> | GO:0030199<br>GO:0061448<br>GO:0001501 | Collagen fibril organization<br>Connective tissue development<br>Skeletal system development         | 1.23*10 <sup>-13</sup><br>2.31*10 <sup>-09</sup><br>3.39*10 <sup>-09</sup> |

|               |                          |                                        |                                                                             |                                                                            |
|---------------|--------------------------|----------------------------------------|-----------------------------------------------------------------------------|----------------------------------------------------------------------------|
| <b>Testis</b> | <i>Rattus norvegicus</i> | GO:0019953<br>GO:0051704<br>GO:0007018 | Sexual reproduction<br>Multi-organism process<br>Microtubule-based movement | $3.98 \times 10^{-24}$<br>$1.61 \times 10^{-18}$<br>$4.00 \times 10^{-12}$ |
|---------------|--------------------------|----------------------------------------|-----------------------------------------------------------------------------|----------------------------------------------------------------------------|

348

349 **Table 2.** Analysis of the top three GO terms for each organ in mouse and rat using the  
350 elevated organ-specific and group-specific canonical proteins as described in the ‘Methods’  
351 section.

352

### 353 **2.5. Protein abundances across orthologs in three species**

354 In a previous study, we analysed 25 label-free proteomics datasets from healthy human  
355 samples to assess baseline protein abundances in 14 organs following the same analytical  
356 methodology [14]. We compared the expression of canonical proteins identified in all three  
357 species (rat, mouse and human). Overall, 13,248 detected human genes (corresponding to the  
358 canonical proteins) were compared with 12,570 genes detected in mouse and 7,116 genes  
359 detected in rat. The number of orthologous mappings (i.e., “one-to-one” mappings, see  
360 ‘Methods’) between rat, mouse and human genes are listed in table 3. We only considered  
361 one-to-one mapped orthologues for the comparison of protein abundances.

362

| Species                  | Identified genes | Orthologs of human genes identified in [14] | Percentage of genes with different mapping against identified human genes |             |              |             |            |
|--------------------------|------------------|---------------------------------------------|---------------------------------------------------------------------------|-------------|--------------|-------------|------------|
|                          |                  |                                             | one-to-one                                                                | one-to-many | many-to-many | many-to-one | not mapped |
| <i>Mus musculus</i>      | 12,570           | 10,601                                      | 80.4%                                                                     | 1.9%        | 0.56%        | 1.46%       | 15.7%      |
| <i>Rattus norvegicus</i> | 7,116            | 6,058                                       | 82.0%                                                                     | 2.2%        | 0.70%        | 0.25%       | 14.9%      |

363

364 **Table 3.** Homologs identified in mouse and rat datasets when compared with the background  
365 list of genes (corresponding to canonical proteins) identified in human datasets  
366 (Supplementary File 2 in [14]).



367

368 Among human and mouse orthologues we observed relatively high levels of correlation of  
369 protein abundances in brain ( $R^2 = 0.61$ ), heart ( $R^2 = 0.65$ ) and liver ( $R^2 = 0.56$ ) (Fig. 7A).

370 Human and rat orthologs showed also relatively high levels of correlation in brain ( $R^2 =$   
371  $0.62$ ), kidney ( $R^2 = 0.53$ ) and liver ( $R^2 = 0.56$ ), but almost no correlation in lung ( $R^2 = 0.12$ )  
372 and testis ( $R^2 = 0.18$ ) (Fig. 7B). Between mouse and rat orthologs, the correlation of protein  
373 abundances was higher in liver ( $R^2 = 0.65$ ), kidney ( $R^2 = 0.54$ ) and brain ( $R^2 = 0.57$ ) samples,  
374 when compared to the samples coming from the rest of the organs (Fig. 7C). Fig. 7D shows  
375 an illustration of some example comparisons of individual orthologs using binned protein  
376 abundances.

377

378 For the same corresponding subsets, we also investigated the correlation of protein  
379 expression between various organs within each organism. We observed that in general the  
380 correlation of protein expression was slightly lower between organs within the same species,  
381 when compared to a higher correlation, which was observed among orthologs (Figure S3 in  
382 Supplementary File 4). The found lower correlation of protein expression between different  
383 organs was more apparent in mouse and rat.

384

385 Among the orthologs expressed in all organs in all three species, 747 (12.3%) orthologs were  
386 detected with a median bin expression value of more than 4, i.e., proteins that appear to have  
387 conserved high expression in all organs and all tissues. Additionally, 13 (0.2%) orthologs  
388 were found with a median bin expression value less than 2 in all organs, although, it is harder  
389 to detect consistently proteins with low abundances across all organs. A full list of the binned  
390 protein abundances of orthologs is available in Supplementary File 7. The illustration of all  
391 binned protein abundances across the three species is shown in Supplementary File 8.

392

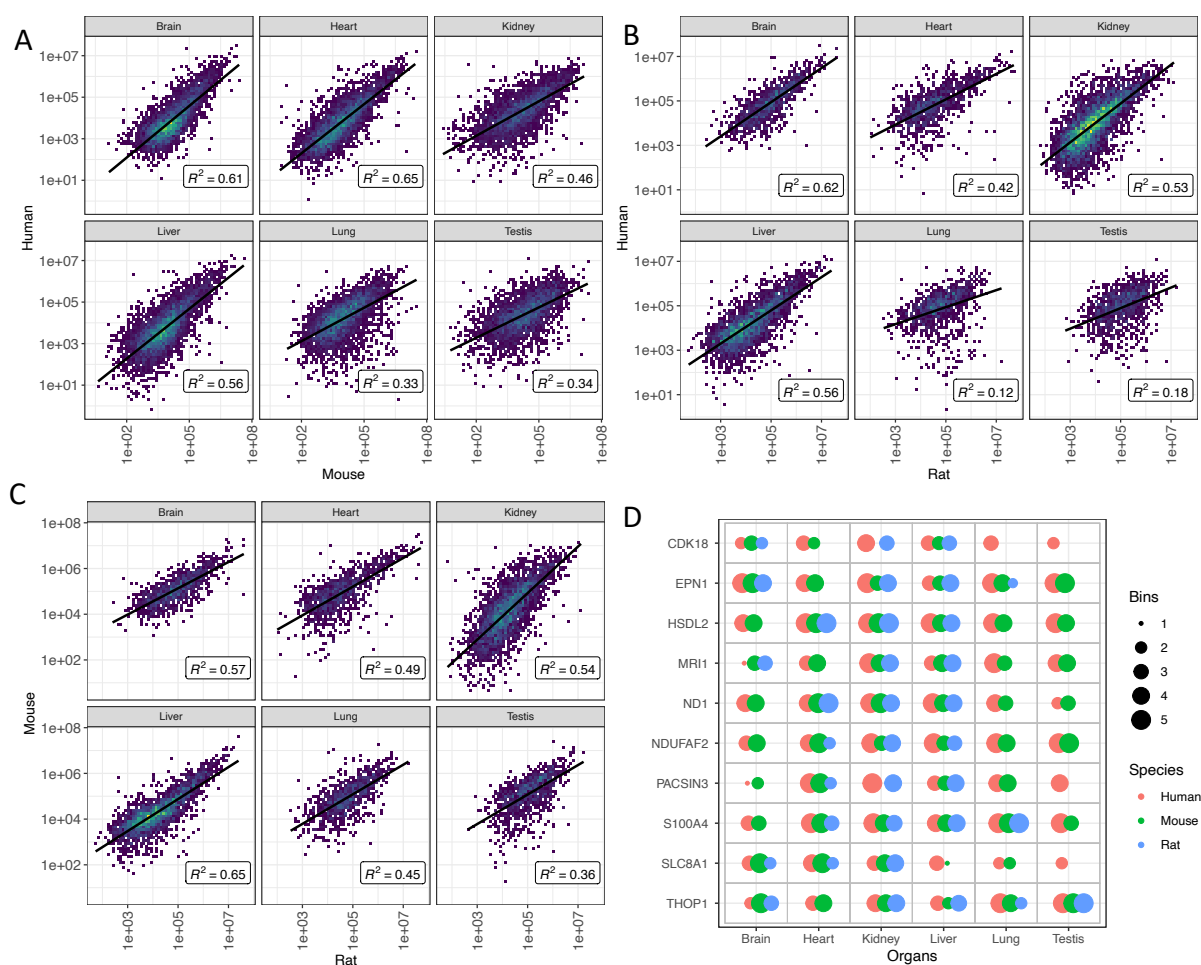

393

394 **Figure 7.** Comparison of protein abundances (in ppb) between one-to-one mapped orthologs  
 395 of mouse, rat and human in various organs. (A) Pairwise correlation using normalised protein  
 396 abundances of human and mouse orthologues. (B) Human and rat orthologues. (C) Mouse and  
 397 rat orthologues. (D) As an example, the comparisons of binned protein expression of ten  
 398 randomly sampled orthologs are shown. Data corresponding to all cases (as reported in panel  
 399 D) are available in Supplementary File 7 and the corresponding illustration of binned values  
 400 is available in Supplementary File 8. Orthologs in (D) are shown using their human gene  
 401 symbol.

402 Since each sample contains potentially thousands of protein values this creates a high level of  
 403 dimensionality within the data. To reduce this, we used the non-linear dimension reduction

404 algorithm, Uniform Manifold Approximation and Projection (UMAP) (see Section 4.7 in the  
405 ‘Methods’ section). The UMAP algorithm enables the reduction of multidimensional data to  
406 a two-dimensional space upon which the relationship between each sample can be visualised.  
407 Specifically, it enables the visualisation of the relationships of proteins across individual  
408 samples and organs. Should multiple samples be positioned near to each other, it allows for  
409 us to predict that these samples shared similar properties (in this case, similar protein  
410 abundance values). Consequently, by overlaying samples from various species UMAP  
411 representations can be used to visualise the relationship of various orthologs across similar  
412 organs.

413 Using the UMAP algorithm, we were able to visualise the relationships between individual  
414 organs regardless of the involved species (human, mouse, rat) and to identify similar genes  
415 (corresponding to canonical proteins) within those organs. The overall view of all samples  
416 labelled by their respective organ is shown as Figure 8A. We chose to use the biological  
417 system as the basis for the colouring scheme for each sample to reduce the overall complexity  
418 of the visualisation, due the high number of organs included. By using this labelling scheme,  
419 we could see that the clustering of each sample was deterministic. Each sample was  
420 positioned within a clear region for the corresponding organs, despite the original layout  
421 being unaware of this information. This indicates that not only do the samples within those  
422 organs share common protein abundance values, but furthermore, that samples that come  
423 from the same organs share similar protein expression (as three species are present).

424 Furthermore, in Figure 8B we show the representation of binned protein abundance values for  
425 three example genes (SH3GL2, MYOZ2 and PYROXD2), providing information on the  
426 abundance of them across different biological systems. These visualisations use the same  
427 layout than within Figure 8A. In the example of SH3GL2, it can be seen that Figure 8B

428 shows multiple values that have been scored as bin 5. By referring to Figure 8A, we can see  
429 that those points corresponding to highly abundant proteins, come from samples from the  
430 nervous system (in all three species). Furthermore, using the same method, it can be seen that  
431 MYOZ2 is highly abundant in the circulatory system, and that PYROXD2 is highly abundant  
432 in the urinary system. The UMAP coordinates and our binned protein abundance data that is  
433 used in these plots to allow for the generation of similar visualisations are provided in  
434 Supplementary File 9.

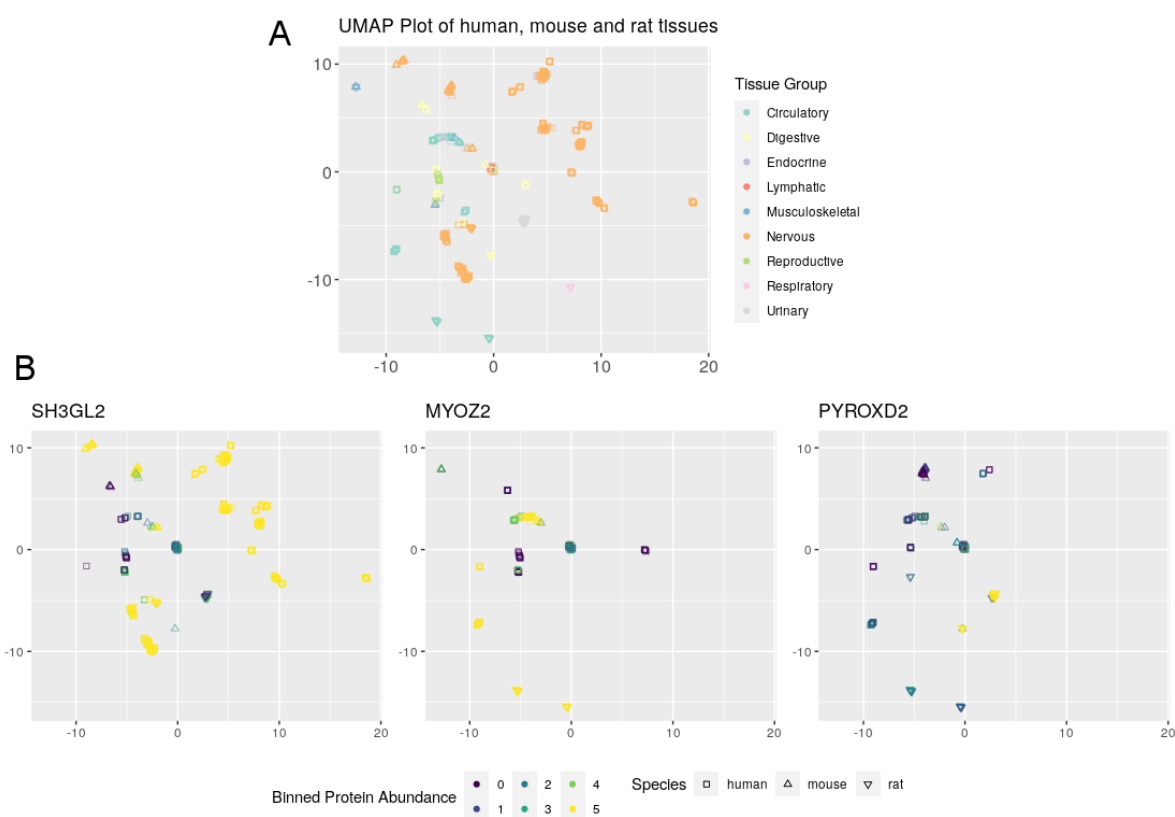

435  
436 **Figure 8:** Visualisations generated using the UMAP algorithm to show the relationships  
437 between human, mouse, and rat samples. (A) Shows the relationship of all samples,  
438 particularly showing strong relationship between biological systems. (B) Shows the protein  
439 abundance of 3 example gene orthologs (SH3GL2, MYOZ2 and PYROXD2), within each  
440 sample. Human baseline protein expression data was generated in [14].

441

## 442 2.6. Pathway enrichment analysis

443 Based on the ortholog protein expression analysis described above, we mapped canonical  
 444 proteins from mouse and rat to the corresponding ortholog human proteins, which were  
 445 subsequently subjected to pathway-enrichment analysis using Reactome (Fig. 9). After  
 446 filtering out the disease and statistically insignificant pathways, there were 2,990 pathways  
 447 found in all the organs of mouse and 2,162 pathways in all the organs of rat. In mouse  
 448 samples, the largest number of pathways (367) were found in articular cartilage, and the  
 449 lowest number of pathways was found in liver (44). We also observed that Neuronal System-  
 450 related pathways were predominantly present in the brain and eye, which is consistent with  
 451 expectations. In rat samples, brain included the largest number of pathways (387), while the  
 452 lowest number of pathways was found in tendon, with 117.

453

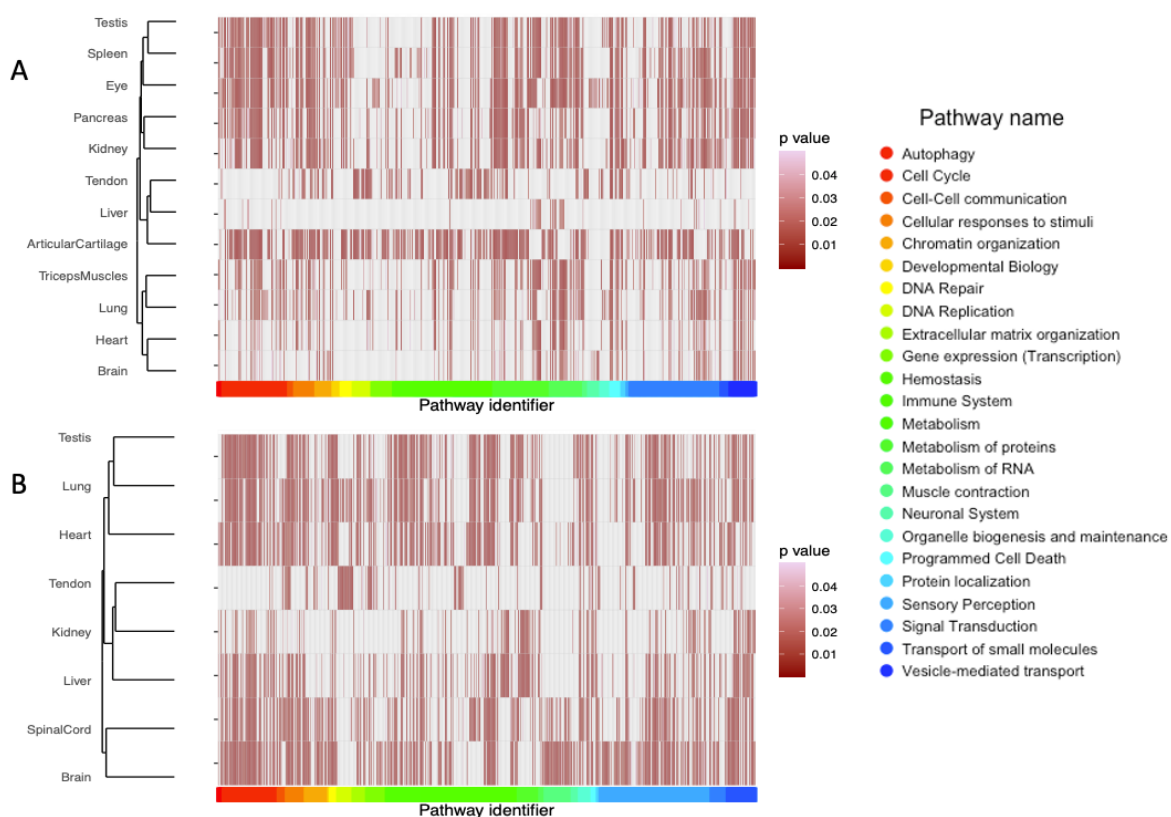

454

455 **Figure 9.** Pathway analysis performed using the canonical proteins, showing the statistically  
456 significant representative pathways (p-value < 0.05) in (A) mouse and (B) rat organs.

### 457 **3. Discussion**

458 We have previously reported two meta-analysis studies involving the reanalysis and  
459 integration in Expression Atlas of public quantitative datasets coming from cell lines and  
460 human tumour samples [13], and from human baseline tissues [14], respectively. In this  
461 study, we reanalysed mouse and rat baseline proteomics datasets representing protein  
462 expression across 34 healthy tissues and 14 organs. We have used the same methodology as  
463 in the study involving baseline human tissues, which enabled a comparison of protein  
464 expression levels across the three species. Our main overall aim was to provide a system-  
465 wide baseline protein expression catalogue across various tissues and organs of mouse and rat  
466 and to offer a reference for future related studies.

467  
468 We analysed each dataset separately using the same software (MaxQuant) and the same  
469 search protein sequence database. The disadvantage of this approach is that the FDR  
470 statistical thresholds are applied at a dataset level and not to all datasets together as a whole.  
471 However, as reported before [14], using a dataset per dataset analysis approach is in our view  
472 the only sustainable manner to reanalyse and integrate quantitative proteomics datasets, at  
473 least at present. The disadvantage of this approach is that the FDR statistical threshold are  
474 applied at a dataset level and not to all datasets together as a whole, with the potential  
475 accumulation of false positives across datasets. However, it is important to highlight that the  
476 number of commonly detected false positives is reduced in parallel with the increase in the  
477 number of common datasets where a given protein is detected. As also reported in previous  
478 studies, one of the major bottlenecks was the curation of dataset metadata, consisting of  
479 mapping files to samples and biological conditions. Very recently, the MAGE-TAB-  
480 Proteomics format has been developed and formalised to enable the reporting of the  
481 experimental design in proteomics experience, including the relationship between samples

482 and raw files, which is recorded in the SDRF-Proteomics section of the file [42]. Submission  
483 of the SDRF-Proteomics files to PRIDE is now supported. The more well-annotated datasets  
484 in the public domain, the easier these data reuse activities will become.

485  
486 The generated baseline protein expression data can be used with different purposes such as  
487 the generation of protein co-expression networks and/or the inference of protein complexes.  
488 For the latter application, expression data can be alone or for potentially refining predictions  
489 obtained using different methods such as the recently developed AlphaFold-based protein  
490 complexes predictions [43]. Mouse and rat are widely used species in the context of drug  
491 discovery, the latter especially, to undertake regulatory pre-clinical safety studies. Therefore,  
492 it is important to know quantitative protein expression distribution in these species in  
493 different tissues [44] to assist in the selection of species for such studies and also for the  
494 interpretation of the final results.

495  
496 In addition to the analyses reported, it would have also been possible to perform correlation  
497 studies between gene and protein expression information. However, we did not find any  
498 relevant public datasets in the context of this manuscript where the same samples were  
499 analysed by both techniques, which is the optimal way to perform these studies. Future  
500 directions in analogous studies will involve: (i) additional baseline protein expression studies  
501 of other species, including other model organisms or other species of economic importance;  
502 (ii) the inclusion of differential proteomics datasets (e.g. using TMT and/or iTRAQ); and (iii)  
503 include relevant proteomics expression data coming from the reanalysis of Data Independent  
504 Acquisition (DIA) datasets [45].

505



506 As mentioned above, we performed a comparative analysis of baseline protein expression  
507 across human, mouse and rat. It was possible to perform this analysis for six common organs  
508 (brain, heart, kidney, liver, lung and testis). Ortholog expression across species is useful to  
509 infer protein function across experimentally studied proteins. This is particularly useful as  
510 evolutionarily closely related species are likely to conserve protein function. We could not  
511 find in the literature an analogous comparative study performed at the protein level.  
512 However, expression from closely related orthologs across tissues or organs has been  
513 compared at the transcriptomics level, providing a complete picture of gene expression. In  
514 this context, many studies have compared gene-expression in mouse, rat and human  
515 orthologues and found that orthologues had generally a highly correlated expression tissue  
516 distribution profile in baseline conditions [46-50]. Gene expression levels among orthologs  
517 were found to be highly similar in muscle and heart tissues, liver and nervous system and less  
518 similar in epithelial cells, reproductive systems, bone and endocrine organs [48]. Studies have  
519 also shown that variability of gene expression between homologous tissues/organs in closely  
520 related species can be lower than the variability between unrelated tissues within the same  
521 organism [46, 47], in agreement with the results reported here at the protein level.  
522 Additionally, we showed an initial analysis of protein expression of orthologs across the three  
523 species using UMAP.  
524  
525 In conclusion we here present a meta-analysis study of public mouse and rat baseline  
526 proteomics datasets from PRIDE. We demonstrate its feasibility, perform a comparative  
527 analysis across the three species and show the main current challenges. Finally, the data is  
528 made available *via* Expression Atlas. Whereas there are several analogous studies performed  
529 at the gene expression level for mouse and rat tissues, to the best of our knowledge this is the  
530 first of this kind at protein expression level.

## 531 4. Materials and Methods

532

### 533 4.1. Datasets

534 As of May 2021, there were 2,060 mouse (*Mus musculus*) and 339 rat (*Rattus norvegicus*)  
535 MS proteomics datasets publicly available in the PRIDE database  
536 (<https://www.ebi.ac.uk/pride/>). Datasets were manually selected based on the selection  
537 criteria described previously [14]. Briefly, we selected datasets where baseline expression  
538 experiments were performed on (i) label-free samples from tissues not enriched for post-  
539 translational modifications; (ii) Thermo Fisher Scientific instruments such as LTQ Orbitrap,  
540 LTQ Orbitrap Elite, LTQ Orbitrap Velos, LTQ Orbitrap XL ETD, LTQ-Orbitrap XL ETD,  
541 Orbitrap Fusion and Q-Exactive, since they represent a large proportion of datasets in PRIDE  
542 and to avoid heterogeneity introduced by data from other vendor instruments; (iii) had  
543 suitable sample metadata available in the original publication or it was possible to obtain it by  
544 contacting the authors; and (iv) our previous experience in the team of some datasets  
545 deposited in PRIDE, which were discarded because they were not considered to be useful.  
546 Overall, 14 mouse and 9 rat datasets were selected from all mouse and rat datasets for further  
547 analysis. Table 1 lists the selected datasets. The 23 datasets contained a total of 211 samples  
548 from 34 different tissues across 14 organs (meaning groups of related tissues, more details  
549 below), comprising 9 different mouse and 3 rat strains, respectively.

550 The sample and experimental metadata were manually curated using the information  
551 provided in the respective publications or by contacting the original authors/submitters.  
552 Annotare [51] was used for annotating the metadata and stored using the Investigation  
553 Description Format (IDF) and Sample-Data Relationship Format (SDRF) file formats [42],  
554 which are required for integration in Expression Atlas. An overview of the experimental  
555 design including experimental factors, protocols, publication information and contact

556 information are present in the IDF file, and the SDRF includes sample metadata describing  
557 the relationship between the various sample characteristics and the data files contained in the  
558 dataset.

559

## 560 **4.2. Proteomics raw data processing**

561 All datasets were analysed with MaxQuant (version 1.6.3.4) [52, 53] on a Linux high-  
562 performance computing cluster for peptide/protein identification and protein quantification.  
563 Input parameters for each dataset, such as MS<sup>1</sup> and MS<sup>2</sup> tolerances, digesting enzymes, fixed  
564 and variable modifications, were set as described in their respective publications, with two  
565 missed cleavage sites. The FDR at the PSM (peptide spectrum match) and protein levels were  
566 set to 1%. The MaxQuant parameters were otherwise set to default values: the maximum  
567 number of modifications per peptide was 5, the minimum peptide length was 7, the maximum  
568 peptide mass was set to 4,600 Da, and for the matches between runs the minimum match time  
569 window was set to 0.7 seconds and the minimum retention time alignment window was set to  
570 20 seconds. The MaxQuant parameter files are available for downloading from Expression  
571 Atlas. The *Mus musculus* UniProt Reference proteome release-2021\_04 (including isoforms,  
572 63,656 sequences) and *Rattus norvegicus* UniProt Reference proteome release-2021\_04  
573 (including isoforms, 31,562 sequences) were used as the target sequence databases for mouse  
574 and rat datasets, respectively. The built-in contaminant database within MaxQuant was used  
575 and a decoy database was generated by MaxQuant by reversing the input database sequences  
576 after the respective enzymatic digestion. The datasets were run separately in multi-threaded  
577 mode.

578

## 579 **4.3. Post-processing**

580 The post-processing of results from MaxQuant is explained in detail in [14]. In brief, the  
581 protein groups labelled as potential contaminants, decoys and those with fewer than 2 PSMs  
582 were removed. Protein intensities in each sample were normalised by scaling the iBAQ  
583 intensity values to the total amount of signal in each MS run and converted to parts per  
584 billion (ppb).

$$585 \quad ppb\_iBAQ_i = \left( \frac{iBAQ_i}{\sum_{i=1}^n iBAQ_i} \right) \times 1,000,000,000$$

586 The ‘majority protein identifiers’ within each protein group were mapped to their Ensembl  
587 gene identifiers/annotations using the Bioconductor package ‘mygene’. For downstream  
588 analysis only protein groups whose isoforms mapped to a single unique Ensembl gene ID  
589 were considered. Protein groups that mapped to more than one Ensembl gene ID are provided  
590 in Supplementary File 1. The protein intensity values from different protein groups with the  
591 same Ensembl gene ID were aggregated as median values. The parent genes to which the  
592 different protein groups were mapped to are equivalent to ‘canonical proteins’ in UniProt  
593 ([https://www.uniprot.org/help/canonical\\_and\\_isoforms](https://www.uniprot.org/help/canonical_and_isoforms)) and therefore the term protein  
594 abundance is used to describe the protein abundance of the canonical protein throughout the  
595 manuscript.

596

#### 597 **4.4. Integration into Expression Atlas**

598 The calculated canonical protein abundances (mapped to genes), together with the validated  
599 SDRF files, summary files detailing the quality of post-processing and the input MaxQuant  
600 parameter files (mqpar.xml) were integrated into Expression Atlas  
601 (<https://www.ebi.ac.uk/gxa/home>) as proteomics baseline experiments (E-PROT identifiers  
602 are available in Table 1).

603

#### 604 **4.5. Protein abundance comparison across datasets**

605 To compare protein abundances, the normalised protein abundances (in ppb) from each group  
606 of tissues in a dataset were converted into ranked bins. In this study, ‘tissue’ is defined as a  
607 distinct functional or structural region within an ‘organ’. For example, hippocampus,  
608 cerebellum and cortex are defined as ‘tissues’ that are part of the brain (organ) and similarly  
609 sinus node, left atria, left ventricle, right atria, right ventricle are defined as ‘tissues’ in heart  
610 (organ). Protein abundances were transformed into bins by first grouping MS runs from each  
611 tissue within a dataset as a batch. The normalised protein abundances (ppb) for each MS run  
612 within a batch were sorted from lowest to highest abundance and ranked into 5 bins. Proteins  
613 whose ppb abundances are ranked in the lowest bin (bin 1) represent lowest abundance and  
614 correspondingly proteins within bin 5 are of highest abundance in their respective tissue.  
615 When merging tissues into organs, median bin values were used.

616 Proteins that were detected in at least 50% of the samples were selected for PCA (Principal  
617 Component Analysis) and was performed using R (The R Stats package) [54] using binned  
618 abundance values. For generating heatmaps, a Pearson correlation coefficient for all samples  
619 was calculated on pairwise complete observations of bin transformed values. Missing values  
620 were marked as NA (not available). For each organ a median  $R^2$  was calculated from all  
621 pairwise  $R^2$  values of their respective samples. Samples were hierarchically clustered on  
622 columns and rows using Euclidean distances. To compare the correlation in protein  
623 expression of shared organs between datasets, the FOT normalised protein abundances (ppb)  
624 were aggregated by calculating the median over samples. The regression line was computed  
625 using the ‘linear model’ (lm) method in R.

#### 626 **4.6 Comparison of protein abundances using iBAQ and spectral counting data available** 627 **in PaxDB**

628 To compare protein abundances generated from iBAQ in this study and spectral counting  
629 methods, protein abundance data from different mouse organs was obtained from PaxDB  
630 (<https://www.pax-db.org/>) [16]. FOT normalised iBAQ abundances, as described above, were  
631 compared with the spectral counting abundances for the matching mouse organs. Organs  
632 from mouse labelled as ‘integrated’ in PaxDB were selected. It was not possible to perform  
633 this comparison for rat organs since data in PaxDB for rat are available for either the ‘whole  
634 organism’ or for “cell types” only. Abundances were compared across mouse adipose tissue,  
635 brain, heart, kidney, liver, lung, pancreas and spleen. The Ensembl ENSG gene ids were  
636 mapped to ENSP protein ids in PaxDB using the ‘mygene’ bioconductor package in R.

#### 637 **4.7. UMAP analysis**

638 To generate the UMAP visualisations we used the binned protein abundance values generated  
639 in this study from rat and mouse, as well as the binned human protein abundance values from  
640 [14]. First, we reduced this data to only contain the orthologs found in all three species. For  
641 the purpose of only the initial visualisation layout, we filtered the data to include those  
642 proteins present in 90% of samples. Once the initial layout was generated, we then used the  
643 full protein abundance values to generate protein-specific visualisations. We use R v4.1.0  
644 with the package ‘umap’ (Uniform Manifold Approximation and Projection in R) [55]  
645 v0.2.7.0 to generate the UMAP visualisations.

#### 646 **4.8. Organ-specific expression profile analysis**

647 For comparison across organs, the tissues were aggregated into organs and their median bin  
648 values were considered. As described previously [14] the classification scheme done by  
649 Uhlén *et al.* [17] was modified to classify the proteins into one of the three categories: (1)  
650 “Organ-enriched”: present in one unique organ with bin values 2-fold higher than the mean

651 bin value across all organs; (2) “Group enriched”: present in at least 7 organs in mouse or in  
652 at least 4 organs in rat, with bin values 2-fold higher than the mean bin value across all  
653 organs; and (3) “Mixed”: the remaining canonical proteins that are not part of the above two  
654 categories.

655  
656 Enriched gene ontology (GO) terms analysis was carried out through over-representation test  
657 described previously [14], it was combined with “Organ-enriched” and “Group enriched”  
658 mapped gene lists for each organ. In addition, Reactome [56] pathway analysis was  
659 performed using mapped gene lists and running pathway-topology and over-representation  
660 analysis, as reported previously [14].

#### 661 **4.9. Comparison of protein expression across species**

662 The g:Orth Orthology search function in the g:Profiler suite of programs [57] was used for  
663 translating gene identifiers between organisms. Since a custom list of gene identifiers could  
664 not be used as the background search set, the mouse and rat genes were first mapped against  
665 the background Ensembl database. The resulting list of mouse and rat genes mapped to  
666 human orthologs were then filtered so that they only included parent gene identifiers of the  
667 protein groups from mouse and rat organs identified in this study and the parent genes of  
668 human organs described in our previous study (Supplementary File 2 in [14]), respectively.

669  
670 The orthologs were grouped into various categories denoting the resulting mapping between  
671 identifiers: “one-to-one”, “one-to-many”, “many-to-one”, “many-to-many”, and “no  
672 mappings” between gene identifiers. Only “one-to-one” mapped ortholog identifiers were  
673 used to compare protein intensities between mouse, rat and human organs. The normalised  
674 ppb protein abundances of the one-to-one mapped orthologues in 6 organs (brain, heart,

675 kidney, liver, lung and testis), that were studied across all three organisms were used to assess  
676 the pairwise correlation of protein abundances. The linear regression was calculated using the  
677 linear fit ‘lm’ method in R.

678

### 679 **Data availability**

680 Expression Atlas E-PROT identifiers and PRIDE original dataset identifiers are included in  
681 Table 1.

### 682 **Acknowledgements**

683 First of all, we would like to thank all data submitters who made their datasets available via  
684 PRIDE and ProteomeXchange. We would also like to thank Andrew Leach and the rest of the  
685 team involved in the Open Targets “Target Safety” project, for helpful discussions.

### 686 **Authors’ contributions**

687 SW, DGS, AP, DJK selected and curated the datasets. SW, AP, DGS performed analyses. AC  
688 and ARJ helped in the interpretation of results and designed approach for data normalisation.  
689 NG, SF, PM, and IP helped in the integration of the results into Expression Atlas. SW, AP,  
690 DGS, JAV wrote the manuscript. JAV, ARJ and IP obtained the funding for performing the  
691 study. All authors have read and approved the manuscript.

692

### 693 **Funding**

694 AP and DGS were funded by Open Targets (project OTAR-02-068),  
695 <https://www.opentargets.org/>. AP, IP, NG, PM, SF and JAV were funded by BBSRC  
696 BB/T019670/1, <https://bbsrc.ukri.org/>. AC and ARJ were funded by BBSRC BB/T019557/1,  
697 <https://bbsrc.ukri.org/>. AP, DGS, SW and JAV were funded by Wellcome Trust [grant



698 number 208391/Z/17/Z], <https://wellcome.org/>. DJK, IP and JAV were funded by EMBL  
699 core funding, <https://www.embl.org/>. The funders had no role in study design, data collection  
700 and analysis, decision to publish, or preparation of the manuscript.

701

## 702 **Supporting information**

703 **Supplementary file 1:** Protein groups from all datasets that are mapped to more than one  
704 Ensembl Gene ID.

705 **Supplementary file 2:** Median protein abundances (in ppb) for each protein group across  
706 various tissue samples in each organ.

707 **Supplementary file 3:** Median binned protein abundances across various tissue samples in  
708 each organ of mouse and rat.

709 **Supplementary file 4:** Supplementary figures (S1) illustrating correlation of protein  
710 abundances in organs represented in different datasets. (S2) Correlation of protein  
711 abundances generated using iBAQ and spectral counting methods in various mouse organs.  
712 (S3) Correlation of protein expression between organs within human, mouse and rat.

713 **Supplementary file 5:** Organ distribution of canonical proteins in mouse and rat.

714 **Supplementary file 6:** Gene Ontology enrichment analysis of ‘organ-enriched’ and ‘group-  
715 enriched’ proteins.

716 **Supplementary file 7:** Binned protein abundances of one-to-one mapped orthologs across all  
717 organs studied.

718 **Supplementary file 8:** Figure illustrating binned protein abundances of all one-to-one  
719 mapped orthologs across six common organs in mouse, rat and human.

720 **Supplementary file 9:** UMAP co-ordinates and source data of UMAP analysis.

721

722 **Abbreviations**

723 DDA: Data Dependent Acquisition

724 DIA: Data Independent Acquisition

725 FOT: Fraction of Total

726 GO: Gene Ontology

727 iBAQ: intensity-based absolute quantification

728 iTRAQ: Isobaric tag for relative and absolute quantitation

729 IDF: Investigation Description Format

730 MS: Mass Spectrometry

731 ppb: Parts per billion

732 PCA: Principal Component Analysis

733 SDRF: Sample and Data Relationship Format

734 TMT: Tandem Mass Tagging

735 UMAP: Uniform Manifold Approximation and Projection

## 736 References

737

- 738 1. Aebersold R, Mann M. Mass-spectrometric exploration of proteome structure and  
739 function. *Nature*. 2016;537(7620):347-55. Epub 2016/09/16. doi: 10.1038/nature19949.  
740 PubMed PMID: 27629641.
- 741 2. Perez-Riverol Y, Csordas A, Bai J, Bernal-Llinares M, Hewapathirana S, Kundu DJ,  
742 et al. The PRIDE database and related tools and resources in 2019: improving support for  
743 quantification data. *Nucleic Acids Res*. 2019;47(D1):D442-D50. Epub 2018/11/06. doi:  
744 10.1093/nar/gky1106. PubMed PMID: 30395289; PubMed Central PMCID:  
745 PMC6323896.
- 746 3. Vizcaino JA, Deutsch EW, Wang R, Csordas A, Reisinger F, Rios D, et al.  
747 ProteomeXchange provides globally coordinated proteomics data submission and  
748 dissemination. *Nat Biotechnol*. 2014;32(3):223-6. Epub 2014/04/15. doi: 10.1038/nbt.2839.  
749 PubMed PMID: 24727771; PubMed Central PMCID: PMC3986813.
- 750 4. Martens L, Vizcaino JA. A Golden Age for Working with Public Proteomics Data.  
751 *Trends Biochem Sci*. 2017;42(5):333-41. Epub 2017/01/26. doi: 10.1016/j.tibs.2017.01.001.  
752 PubMed PMID: 28118949; PubMed Central PMCID: PMC5414595.
- 753 5. Romanov N, Kuhn M, Aebersold R, Ori A, Beck M, Bork P. Disentangling Genetic  
754 and Environmental Effects on the Proteotypes of Individuals. *Cell*. 2019;177(5):1308-18 e10.  
755 Epub 2019/04/30. doi: 10.1016/j.cell.2019.03.015. PubMed PMID: 31031010; PubMed  
756 Central PMCID: PMC6988111.
- 757 6. Skinnider MA, Foster LJ. Meta-analysis defines principles for the design and analysis  
758 of co-fractionation mass spectrometry experiments. *Nat Methods*. 2021;18(7):806-15. Epub  
759 2021/07/03. doi: 10.1038/s41592-021-01194-4. PubMed PMID: 34211188.
- 760 7. Ochoa D, Jarnuczak AF, Vieitez C, Gehre M, Soucheray M, Mateus A, et al. The  
761 functional landscape of the human phosphoproteome. *Nat Biotechnol*. 2020;38(3):365-73.  
762 Epub 2019/12/11. doi: 10.1038/s41587-019-0344-3. PubMed PMID: 31819260; PubMed  
763 Central PMCID: PMC7100915.
- 764 8. Vaudel M, Verheggen K, Csordas A, Raeder H, Berven FS, Martens L, et al.  
765 Exploring the potential of public proteomics data. *Proteomics*. 2016;16(2):214-25. Epub  
766 2015/10/10. doi: 10.1002/pmic.201500295. PubMed PMID: 26449181; PubMed Central  
767 PMCID: PMC4738454.
- 768 9. Kumar D, Yadav AK, Jia X, Mulvenna J, Dash D. Integrated Transcriptomic-  
769 Proteomic Analysis Using a Proteogenomic Workflow Refines Rat Genome Annotation. *Mol*  
770 *Cell Proteomics*. 2016;15(1):329-39. Epub 2015/11/13. doi: 10.1074/mcp.M114.047126.  
771 PubMed PMID: 26560066; PubMed Central PMCID: PMC4762527.
- 772 10. Brunet MA, Brunelle M, Lucier JF, Delcourt V, Levesque M, Grenier F, et al.  
773 OpenProt: a more comprehensive guide to explore eukaryotic coding potential and  
774 proteomes. *Nucleic Acids Res*. 2019;47(D1):D403-D10. Epub 2018/10/10. doi:  
775 10.1093/nar/gky936. PubMed PMID: 30299502; PubMed Central PMCID:  
776 PMC6323990.
- 777 11. Levitsky LI, Kliuchnikova AA, Kuznetsova KG, Karpov DS, Ivanov MV, Pyatnitskiy  
778 MA, et al. Adenosine-to-Inosine RNA Editing in Mouse and Human Brain Proteomes.  
779 *Proteomics*. 2019;19(23):e1900195. Epub 2019/10/03. doi: 10.1002/pmic.201900195.  
780 PubMed PMID: 31576663.
- 781 12. Li H, Zhou R, Xu S, Chen X, Hong Y, Lu Q, et al. Improving Gene Annotation of the  
782 Peanut Genome by Integrated Proteogenomics Workflow. *J Proteome Res*. 2020;19(6):2226-  
783 35. Epub 2020/05/06. doi: 10.1021/acs.jproteome.9b00723. PubMed PMID: 32367721.
- 784 13. Jarnuczak AF, Najgebauer H, Barzine M, Kundu DJ, Ghavidel F, Perez-Riverol Y, et  
785 al. An integrated landscape of protein expression in human cancer. *Sci Data*. 2021;8(1):115.

- 786 Epub 2021/04/25. doi: 10.1038/s41597-021-00890-2. PubMed PMID: 33893311; PubMed  
787 Central PMCID: PMCPMC8065022.
- 788 14. Prakash A, García-Seisdedos D, Wang S, Kundu DJ, Collins A, George N, et al. An  
789 integrated view of baseline protein expression in human tissues. *bioRxiv*.  
790 2021:2021.09.10.459811. doi: 10.1101/2021.09.10.459811.
- 791 15. Samaras P, Schmidt T, Frejno M, Gessulat S, Reinecke M, Jarzab A, et al.  
792 ProteomicsDB: a multi-omics and multi-organism resource for life science research. *Nucleic  
793 Acids Res.* 2020;48(D1):D1153-D63. Epub 2019/10/31. doi: 10.1093/nar/gkz974. PubMed  
794 PMID: 31665479; PubMed Central PMCID: PMCPMC7145565.
- 795 16. Wang M, Herrmann CJ, Simonovic M, Szklarczyk D, von Mering C. Version 4.0 of  
796 PaxDb: Protein abundance data, integrated across model organisms, tissues, and cell-lines.  
797 *Proteomics.* 2015;15(18):3163-8. Epub 2015/02/07. doi: 10.1002/pmic.201400441. PubMed  
798 PMID: 25656970; PubMed Central PMCID: PMCPMC6680238.
- 799 17. Uhlen M, Fagerberg L, Hallstrom BM, Lindskog C, Oksvold P, Mardinoglu A, et al.  
800 *Proteomics. Tissue-based map of the human proteome. Science.* 2015;347(6220):1260419.  
801 Epub 2015/01/24. doi: 10.1126/science.1260419. PubMed PMID: 25613900.
- 802 18. Azimifar SB, Nagaraj N, Cox J, Mann M. Cell-type-resolved quantitative proteomics  
803 of murine liver. *Cell Metab.* 2014;20(6):1076-87. Epub 2014/12/04. doi:  
804 10.1016/j.cmet.2014.11.002. PubMed PMID: 25470552.
- 805 19. Deshmukh AS, Murgia M, Nagaraj N, Treebak JT, Cox J, Mann M. Deep proteomics  
806 of mouse skeletal muscle enables quantitation of protein isoforms, metabolic pathways, and  
807 transcription factors. *Mol Cell Proteomics.* 2015;14(4):841-53. Epub 2015/01/27. doi:  
808 10.1074/mcp.M114.044222. PubMed PMID: 25616865; PubMed Central PMCID:  
809 PMCPMC4390264.
- 810 20. Meierhofer D, Halbach M, Sen NE, Gispert S, Auburger G. Ataxin-2 (Atxn2)-Knock-  
811 Out Mice Show Branched Chain Amino Acids and Fatty Acids Pathway Alterations. *Mol  
812 Cell Proteomics.* 2016;15(5):1728-39. Epub 2016/02/07. doi: 10.1074/mcp.M115.056770.  
813 PubMed PMID: 26850065; PubMed Central PMCID: PMCPMC4858951.
- 814 21. Sarver DC, Kharaz YA, Sugg KB, Gumucio JP, Comerford E, Mendias CL. Sex  
815 differences in tendon structure and function. *J Orthop Res.* 2017;35(10):2117-26. Epub  
816 2017/01/11. doi: 10.1002/jor.23516. PubMed PMID: 28071813; PubMed Central PMCID:  
817 PMCPMC5503813.
- 818 22. Duda P, Wojcicka O, Wisniewski JR, Rakus D. Global quantitative TPA-based  
819 proteomics of mouse brain structures reveals significant alterations in expression of proteins  
820 involved in neuronal plasticity during aging. *Aging (Albany NY).* 2018;10(7):1682-97. Epub  
821 2018/07/22. doi: 10.18632/aging.101501. PubMed PMID: 30026405; PubMed Central  
822 PMCID: PMCPMC6075443.
- 823 23. Harman JC, Guidry JJ, Gidday JM. Comprehensive characterization of the adult ND4  
824 Swiss Webster mouse retina: Using discovery-based mass spectrometry to decipher the total  
825 proteome and phosphoproteome. *Mol Vis.* 2018;24:875-89. Epub 2019/02/05. PubMed  
826 PMID: 30713425; PubMed Central PMCID: PMCPMC6334985.
- 827 24. Angelidis I, Simon LM, Fernandez IE, Strunz M, Mayr CH, Greiffo FR, et al. An  
828 atlas of the aging lung mapped by single cell transcriptomics and deep tissue proteomics. *Nat  
829 Commun.* 2019;10(1):963. Epub 2019/03/01. doi: 10.1038/s41467-019-08831-9. PubMed  
830 PMID: 30814501; PubMed Central PMCID: PMCPMC6393476.
- 831 25. Zhao Y, Wilmarth PA, Cheng C, Limi S, Fowler VM, Zheng D, et al. Proteome-  
832 transcriptome analysis and proteome remodeling in mouse lens epithelium and fibers. *Exp  
833 Eye Res.* 2019;179:32-46. Epub 2018/10/26. doi: 10.1016/j.exer.2018.10.011. PubMed  
834 PMID: 30359574; PubMed Central PMCID: PMCPMC6360118.

- 835 26. Huttlin EL, Jedrychowski MP, Elias JE, Goswami T, Rad R, Beausoleil SA, et al. A  
836 tissue-specific atlas of mouse protein phosphorylation and expression. *Cell*.  
837 2010;143(7):1174-89. Epub 2010/12/25. doi: 10.1016/j.cell.2010.12.001. PubMed PMID:  
838 21183079.
- 839 27. Linscheid N, Santos A, Poulsen PC, Mills RW, Calloe K, Leurs U, et al. Quantitative  
840 proteome comparison of human hearts with those of model organisms. *PLoS Biol*.  
841 2021;19(4):e3001144. Epub 2021/04/20. doi: 10.1371/journal.pbio.3001144. PubMed PMID:  
842 33872299; PubMed Central PMCID: PMC8084454.
- 843 28. Dudek M, Angelucci C, Pathirana D, Wang P, Mallikarjun V, Lawless C, et al.  
844 Circadian time series proteomics reveals daily dynamics in cartilage physiology.  
845 *Osteoarthritis Cartilage*. 2021;29(5):739-49. Epub 2021/02/22. doi:  
846 10.1016/j.joca.2021.02.008. PubMed PMID: 33610821; PubMed Central PMCID:  
847 PMC8113022.
- 848 29. Schroeder S, Hofer SJ, Zimmermann A, Pechlaner R, Dammbrueck C, Pendl T, et al.  
849 Dietary spermidine improves cognitive function. *Cell Rep*. 2021;35(2):108985. Epub  
850 2021/04/15. doi: 10.1016/j.celrep.2021.108985. PubMed PMID: 33852843.
- 851 30. Bundy JL, Vied C, Nowakowski RS. Sex differences in the molecular signature of the  
852 developing mouse hippocampus. *BMC Genomics*. 2017;18(1):237. Epub 2017/03/18. doi:  
853 10.1186/s12864-017-3608-7. PubMed PMID: 28302071; PubMed Central PMCID:  
854 PMC5356301.
- 855 31. Linscheid N, Logantha S, Poulsen PC, Zhang S, Schrolkamp M, Egerod KL, et al.  
856 Quantitative proteomics and single-nucleus transcriptomics of the sinus node elucidates the  
857 foundation of cardiac pacemaking. *Nat Commun*. 2019;10(1):2889. Epub 2019/06/30. doi:  
858 10.1038/s41467-019-10709-9. PubMed PMID: 31253831; PubMed Central PMCID:  
859 PMC6599035.
- 860 32. Alugubelly N, Mohammed AN, Edelman MJ, Nanduri B, Sayed M, Park JW, et al.  
861 Adolescent rat social play: Amygdalar proteomic and transcriptomic data. *Data Brief*.  
862 2019;27:104589. Epub 2019/11/02. doi: 10.1016/j.dib.2019.104589. PubMed PMID:  
863 31673590; PubMed Central PMCID: PMC6817652.
- 864 33. Roffia V, De Palma A, Lonati C, Di Silvestre D, Rossi R, Mantero M, et al. Proteome  
865 Investigation of Rat Lungs subjected to Ex Vivo Perfusion (EVLP). *Molecules*. 2018;23(12).  
866 Epub 2018/11/24. doi: 10.3390/molecules23123061. PubMed PMID: 30467300; PubMed  
867 Central PMCID: PMC6321151.
- 868 34. Bernier M, Harney D, Koay YC, Diaz A, Singh A, Wahl D, et al. Elucidating the  
869 mechanisms by which disulfiram protects against obesity and metabolic syndrome. *NPJ*  
870 *Aging Mech Dis*. 2020;6:8. Epub 2020/07/28. doi: 10.1038/s41514-020-0046-6. PubMed  
871 PMID: 32714562; PubMed Central PMCID: PMC7374720.
- 872 35. Huang Q, Luo L, Alamdar A, Zhang J, Liu L, Tian M, et al. Integrated proteomics  
873 and metabolomics analysis of rat testis: Mechanism of arsenic-induced male reproductive  
874 toxicity. *Sci Rep*. 2016;6:32518. Epub 2016/09/03. doi: 10.1038/srep32518. PubMed PMID:  
875 27585557; PubMed Central PMCID: PMC5009432.
- 876 36. Kaushik G, Spenlehauer A, Sessions AO, Trujillo AS, Fuhrmann A, Fu Z, et al.  
877 Vinculin network-mediated cytoskeletal remodeling regulates contractile function in the  
878 aging heart. *Sci Transl Med*. 2015;7(292):292ra99. Epub 2015/06/19. doi:  
879 10.1126/scitranslmed.aaa5843. PubMed PMID: 26084806; PubMed Central PMCID:  
880 PMC4507505.
- 881 37. Vileigas DF, Harman VM, Freire PP, Marciano CLC, Sant'Ana PG, de Souza SLB, et  
882 al. Landscape of heart proteome changes in a diet-induced obesity model. *Sci Rep*.  
883 2019;9(1):18050. Epub 2019/12/04. doi: 10.1038/s41598-019-54522-2. PubMed PMID:  
884 31792287; PubMed Central PMCID: PMC6888820.

- 885 38. Limbutara K, Chou CL, Knepper MA. Quantitative Proteomics of All 14 Renal  
886 Tubule Segments in Rat. *J Am Soc Nephrol*. 2020;31(6):1255-66. Epub 2020/05/03. doi:  
887 10.1681/ASN.2020010071. PubMed PMID: 32358040; PubMed Central PMCID:  
888 PMCPMC7269347.
- 889 39. Devaux S, Cizkova D, Quanicco J, Franck J, Nataf S, Pays L, et al. Proteomic Analysis  
890 of the Spatio-temporal Based Molecular Kinetics of Acute Spinal Cord Injury Identifies a  
891 Time- and Segment-specific Window for Effective Tissue Repair. *Mol Cell Proteomics*.  
892 2016;15(8):2641-70. Epub 2016/06/03. doi: 10.1074/mcp.M115.057794. PubMed PMID:  
893 27250205; PubMed Central PMCID: PMCPMC4974342.
- 894 40. Choi H, Simpson D, Wang D, Prescott M, Pitsillides AA, Dudhia J, et al.  
895 Heterogeneity of proteome dynamics between connective tissue phases of adult tendon. *Elife*.  
896 2020;9. Epub 2020/05/13. doi: 10.7554/eLife.55262. PubMed PMID: 32393437; PubMed  
897 Central PMCID: PMCPMC7217697.
- 898 41. Hodge K, Have ST, Hutton L, Lamond AI. Cleaning up the masses: exclusion lists to  
899 reduce contamination with HPLC-MS/MS. *J Proteomics*. 2013;88:92-103. Epub 2013/03/19.  
900 doi: 10.1016/j.jprot.2013.02.023. PubMed PMID: 23501838; PubMed Central PMCID:  
901 PMCPMC3714598.
- 902 42. Dai C, Fullgrabe A, Pfeuffer J, Solovyeva EM, Deng J, Moreno P, et al. A proteomics  
903 sample metadata representation for multiomics integration and big data analysis. *Nat*  
904 *Commun*. 2021;12(1):5854. Epub 2021/10/08. doi: 10.1038/s41467-021-26111-3. PubMed  
905 PMID: 34615866; PubMed Central PMCID: PMCPMC8494749.
- 906 43. Evans R, O'Neill M, Pritzel A, Antropova N, Senior A, Green T, et al. Protein  
907 complex prediction with AlphaFold-Multimer. *bioRxiv*. 2021:2021.10.04.463034. doi:  
908 10.1101/2021.10.04.463034.
- 909 44. Bregman CL, Adler RR, Morton DG, Regan KS, Yano BL, Society of Toxicologic P.  
910 Recommended tissue list for histopathologic examination in repeat-dose toxicity and  
911 carcinogenicity studies: a proposal of the Society of Toxicologic Pathology (STP). *Toxicol*  
912 *Pathol*. 2003;31(2):252-3. Epub 2003/04/17. doi: 10.1080/01926230390183751. PubMed  
913 PMID: 12696587.
- 914 45. Walzer M, García-Seisdedos D, Prakash A, Brack P, Crowther P, Graham RL, et al.  
915 Implementing the re-use of public DIA proteomics datasets: from the PRIDE database to  
916 Expression Atlas. *bioRxiv*. 2021:2021.06.08.447493. doi: 10.1101/2021.06.08.447493.
- 917 46. Sollner JF, Leparc G, Hildebrandt T, Klein H, Thomas L, Stupka E, et al. An RNA-  
918 Seq atlas of gene expression in mouse and rat normal tissues. *Sci Data*. 2017;4:170185. Epub  
919 2017/12/13. doi: 10.1038/sdata.2017.185. PubMed PMID: 29231921; PubMed Central  
920 PMCID: PMCPMC5726313.
- 921 47. Sudmant PH, Alexis MS, Burge CB. Meta-analysis of RNA-seq expression data  
922 across species, tissues and studies. *Genome Biol*. 2015;16:287. Epub 2015/12/24. doi:  
923 10.1186/s13059-015-0853-4. PubMed PMID: 26694591; PubMed Central PMCID:  
924 PMCPMC4699362.
- 925 48. Zheng-Bradley X, Rung J, Parkinson H, Brazma A. Large scale comparison of global  
926 gene expression patterns in human and mouse. *Genome Biol*. 2010;11(12):R124. Epub  
927 2010/12/25. doi: 10.1186/gb-2010-11-12-r124. PubMed PMID: 21182765; PubMed Central  
928 PMCID: PMCPMC3046484.
- 929 49. Liao BY, Zhang J. Evolutionary conservation of expression profiles between human  
930 and mouse orthologous genes. *Mol Biol Evol*. 2006;23(3):530-40. Epub 2005/11/11. doi:  
931 10.1093/molbev/msj054. PubMed PMID: 16280543.
- 932 50. Prasad A, Kumar SS, Dessimoz C, Bleuler S, Laule O, Hruz T, et al. Global  
933 regulatory architecture of human, mouse and rat tissue transcriptomes. *BMC Genomics*.

- 934 2013;14:716. Epub 2013/10/22. doi: 10.1186/1471-2164-14-716. PubMed PMID: 24138449;  
935 PubMed Central PMCID: PMCPMC4008137.
- 936 51. Athar A, Fullgrabe A, George N, Iqbal H, Huerta L, Ali A, et al. ArrayExpress update  
937 - from bulk to single-cell expression data. *Nucleic Acids Res.* 2019;47(D1):D711-D5. Epub  
938 2018/10/26. doi: 10.1093/nar/gky964. PubMed PMID: 30357387; PubMed Central PMCID:  
939 PMCPMC6323929.
- 940 52. Cox J, Mann M. MaxQuant enables high peptide identification rates, individualized  
941 p.p.b.-range mass accuracies and proteome-wide protein quantification. *Nat Biotechnol.*  
942 2008;26(12):1367-72. Epub 2008/11/26. doi: 10.1038/nbt.1511. PubMed PMID: 19029910.
- 943 53. Tyanova S, Temu T, Cox J. The MaxQuant computational platform for mass  
944 spectrometry-based shotgun proteomics. *Nat Protoc.* 2016;11(12):2301-19. Epub 2016/11/04.  
945 doi: 10.1038/nprot.2016.136. PubMed PMID: 27809316.
- 946 54. Team RC. R: A language and environment for statistical computing. R  
947 Foundation for Statistical Computing, Vienna, Austria. ISBN 3-900051-07-0, URL  
948 <http://www.R-project.org/>. 2013.
- 949 55. McInnes L HJ, Melville J. UMAP: Uniform Manifold Approximation and Projection  
950 for dimension reduction. arXiv. 2018.
- 951 56. Wu G, Haw R. Functional Interaction Network Construction and Analysis for Disease  
952 Discovery. *Methods Mol Biol.* 2017;1558:235-53. Epub 2017/02/06. doi: 10.1007/978-1-  
953 4939-6783-4\_11. PubMed PMID: 28150241.
- 954 57. Raudvere U, Kolberg L, Kuzmin I, Arak T, Adler P, Peterson H, et al. g:Profiler: a  
955 web server for functional enrichment analysis and conversions of gene lists (2019 update).  
956 *Nucleic Acids Res.* 2019;47(W1):W191-W8. Epub 2019/05/09. doi: 10.1093/nar/gkz369.  
957 PubMed PMID: 31066453; PubMed Central PMCID: PMCPMC6602461.  
958
