# Supplementary material for: Integrated view and comparative analysis of baseline protein expression in mouse and rat tissues
Source: bioRxiv preprint, doi:10.1101/2021.12.20.473413, version 2 (2022-05-03)
Supplement: Supplemental File 1 [file 473413_file02.xlsx]

## Sheet: Mouse
Majority.protein.IDs	Gene ID	Gene.Symbol	unique.gene.count
A0A023T778;G3UZW7;P61327;Q9CQL1	ENSMUSG00000030188;ENSMUSG00000028609	Magohb;Magoh	2
A0A023T778;P61327;Q9CQL1	ENSMUSG00000030188;ENSMUSG00000028609	Magohb;Magoh	2
A0A075B5J9;A0A075B5K3;A0A0G2JDN5;A0A0G2JFA8	ENSMUSG00000076508;ENSMUSG00000076514	Igkv17-127;Igkv17-121	2
A0A075B5K0;A0A140T8P9;P01637;P01638	ENSMUSG00000094345;ENSMUSG00000095771	Igkv14-126;Igkv14-111	2
A0A075B5K8;A0A075B5N0;A0A0B4J1I0;A0A0G2JDE5;A0A140T8M0;A0A140T8M9;A0A140T8N1;F6XWB2;P01631	ENSMUSG00000076525;ENSMUSG00000076573;ENSMUSG00000093861;ENSMUSG00000094335;ENSMUSG00000095497;ENSMUSG00000076535	Igkv1-99;Igkv1-35;Igkv1-110;Igkv1-117;Igkv1-122;Igkv1-88	6
A0A075B5K8;A0A0B4J1I0;A0A140T8M0;A0A140T8N1;F6XWB2;P01631	ENSMUSG00000076525;ENSMUSG00000093861;ENSMUSG00000094335;ENSMUSG00000076535	Igkv1-99;Igkv1-110;Igkv1-117;Igkv1-88	4
A0A075B5K8;A0A140T8N1;F6XWB2;P01631	ENSMUSG00000076525;ENSMUSG00000076535	Igkv1-99;Igkv1-88	2
A0A075B5L2;A0A075B5M2;A0A075B5M3;A0A0G2JGI6;A0A0G2JH00;J3QNZ9;L7N239;P01680	ENSMUSG00000076532;ENSMUSG00000076552;ENSMUSG00000095633;ENSMUSG00000094262;ENSMUSG00000073028	Igkv4-91;Igkv4-61;Igkv4-58;Igkv4-62;Igkv4-71	5
A0A075B5L2;A0A075B5M2;A0A075B5M3;A0A0G2JGI6;A0A0G2JH00;P01680	ENSMUSG00000076532;ENSMUSG00000076552;ENSMUSG00000095633	Igkv4-91;Igkv4-61;Igkv4-58	3
A0A075B5L4;A0A075B6D5;A0A0G2JFZ3;A0A0G2JGW8	ENSMUSG00000076534;ENSMUSG00000098814	Igkv12-89;Igkv19-93	2
A0A075B5L5;A0A0B4J1I5;A0A0B4J1I8;A0A0G2JGE7;P01675;P01676;P01677;P01678;P01679;P04940;P04941;P04944	ENSMUSG00000076536;ENSMUSG00000076547;ENSMUSG00000094006	Igkv4-86;Igkv4-70;Igkv4-59	3
A0A075B5L8;A0A075B5M4;A0A0A6YYE5;A0A0A6YYE7;A0A0B4J1I3;A0A0B4J1I4	ENSMUSG00000076541;ENSMUSG00000076555;ENSMUSG00000094315;ENSMUSG00000076556;ENSMUSG00000076543;ENSMUSG00000076545	Igkv4-79;Igkv4-57-1;Igkv4-78;Igkv4-57;Igkv4-74;Igkv4-72	6
A0A075B5L8;A0A075B5M4;A0A0A6YYE5;A0A0A6YYE7;A0A0B4J1I3;A0A0B4J1I4;A0A0B4J1I9	ENSMUSG00000076541;ENSMUSG00000076555;ENSMUSG00000094315;ENSMUSG00000076556;ENSMUSG00000076543;ENSMUSG00000076545;ENSMUSG00000096833	Igkv4-79;Igkv4-57-1;Igkv4-78;Igkv4-57;Igkv4-74;Igkv4-72;Igkv4-55	7
A0A075B5M7;A0A0B4J1J1;A0A0B4J1J2;A0A0G2JDV4	ENSMUSG00000076569;ENSMUSG00000094094;ENSMUSG00000094433	Igkv5-39;Igkv5-45;Igkv5-43	3
A0A075B5M7;A0A0B4J1J1;A0A0G2JDV4	ENSMUSG00000076569;ENSMUSG00000094094	Igkv5-39;Igkv5-45	2
A0A075B5N2;A0A0G2JEI6;A0A140T8P2;P01634	ENSMUSG00000076578;ENSMUSG00000076587	Igkv6-29;Igkv6-20	2
A0A075B5N3;A0A075B5N4;A0A0G2JE47;A0A0G2JF28;A0A140T8P5;A0A140T8P7	ENSMUSG00000094356;ENSMUSG00000076580;ENSMUSG00000076583;ENSMUSG00000076586	Igkv8-28;Igkv8-27;Igkv8-24;Igkv8-21	4
A0A075B5N4;A0A0G2JF28;A0A0G2JFN8;A0A140T8M3;A0A140T8M4;A0A140T8N5;A0A140T8N7;A0A140T8P7	ENSMUSG00000076580;ENSMUSG00000096594;ENSMUSG00000076577;ENSMUSG00000095630;ENSMUSG00000094930;ENSMUSG00000076586	Igkv8-27;Igkv8-19;Igkv8-30;Igkv6-23;Igkv6-25;Igkv8-21	6
A0A075B5N4;A0A0G2JF28;A0A140T8M3;A0A140T8P7	ENSMUSG00000076580;ENSMUSG00000076577;ENSMUSG00000076586	Igkv8-27;Igkv8-30;Igkv8-21	3
A0A075B5N4;A0A0G2JF28;A0A140T8P7	ENSMUSG00000076580;ENSMUSG00000076586	Igkv8-27;Igkv8-21	2
A0A075B5N7;A0A0G2JGY3;A0A140T8M5;A0A140T8N5	ENSMUSG00000076594;ENSMUSG00000094797;ENSMUSG00000095630	Igkv6-13;Igkv6-15;Igkv6-23	3
A0A075B5N7;A0A0G2JGY3;A0A140T8M5;A0A140T8N5;A0A140T8N7;A0A140T8P1;A0A140T8Q3;P01633	ENSMUSG00000076594;ENSMUSG00000094797;ENSMUSG00000095630;ENSMUSG00000094930;ENSMUSG00000096844;ENSMUSG00000095794	Igkv6-13;Igkv6-15;Igkv6-23;Igkv6-25;Igkv6-14;Igkv6-17	6
A0A075B5N7;A0A0G2JGY3;A0A140T8N5;A0A140T8N7;A0A140T8P1;A0A140T8Q3;P01633	ENSMUSG00000076594;ENSMUSG00000095630;ENSMUSG00000094930;ENSMUSG00000096844;ENSMUSG00000095794	Igkv6-13;Igkv6-23;Igkv6-25;Igkv6-14;Igkv6-17	5
A0A075B5N8;A0A0G2JGN0;A0A140T8M6;P01661;P01662;P01663	ENSMUSG00000076596;ENSMUSG00000095335	Igkv3-10;Igkv3-5	2
A0A075B5N9;A0A075B5P0;P01654;P01655;P01656;P01657;P01659;P01664;P01668;P01672;P01673;P03977	ENSMUSG00000076598;ENSMUSG00000095351	Igkv3-7;Igkv3-2	2
A0A075B5N9;A0A140T8Q4;P01654;P01655;P01656;P01657;P01659;P01660;P01664;P01665;P01666;P01667;P01668;P01669;P01671;P01672;P01673;P03977	ENSMUSG00000076598;ENSMUSG00000096715	Igkv3-7;Igkv3-4	2
A0A075B5P9;A0A075B5Q4;A0A075B5Q9;A0A075B5R1;A0A0A6YWC7;P18525;P18527;P18529	ENSMUSG00000095612;ENSMUSG00000095429;ENSMUSG00000094134;ENSMUSG00000095571	Ighv5-4;Ighv5-12;Ighv5-15;Ighv5-17	4
A0A075B5Q0;A0A075B5Q6;A0A0A6YVS4;P18524;P18526	ENSMUSG00000094951;ENSMUSG00000095210	Ighv5-6;Ighv5-9-1	2
A0A075B5Q1;A0A075B5Q3;A0A0A6YY69	ENSMUSG00000095866;ENSMUSG00000096498	Ighv2-4;Ighv2-5	2
A0A075B5Q4;A0A075B5Q9;A0A0A6YWC7;P18525	ENSMUSG00000095429;ENSMUSG00000094134	Ighv5-12;Ighv5-15	2
A0A075B5R2;A0A075B5R3;A0A0A6YX91;P01786	ENSMUSG00000076652;ENSMUSG00000076653	Ighv7-3;Ighv7-2	2
A0A075B5S1;A0A075B5S9;A0A0A6YWH6;A0A0B4J1J4;A0A0B4J1J5	ENSMUSG00000096805;ENSMUSG00000094322;ENSMUSG00000094102;ENSMUSG00000096459	Ighv9-1;Ighv9-4;Ighv9-2;Ighv9-3	4
A0A075B5S9;A0A0A6YWH6;A0A0B4J1J5	ENSMUSG00000094322;ENSMUSG00000096459	Ighv9-4;Ighv9-3	2
A0A075B5T7;A0A075B5W2;A0A075B5W3;A0A075B5X0;A0A075B5X3;A0A075B5Y1;A0A0A6YXC3;A0A0A6YXE0;A0A0G2JGK2;P01748;P01750;P01753;P01754;P06328	ENSMUSG00000095200;ENSMUSG00000095204;ENSMUSG00000093894;ENSMUSG00000095197;ENSMUSG00000094088;ENSMUSG00000094124;ENSMUSG00000096767;ENSMUSG00000096074	Ighv1-7;Ighv1-52;Ighv1-53;Ighv1-59;Ighv1-64;Ighv1-74;Ighv1-62-3;Ighv1-72	8
A0A075B5U4;A0A075B5U7;A0A075B5V0;A0A075B5V1;A0A075B5V2;A0A075B5V6;A0A075B5Y4;A0A0A6YVW3;A0A0A6YWK5;A0A0A6YXA5;A0A0A6YXN4;P01756;P01757;P06330	ENSMUSG00000076695;ENSMUSG00000094561;ENSMUSG00000094546;ENSMUSG00000096649;ENSMUSG00000093955;ENSMUSG00000094652;ENSMUSG00000094689;ENSMUSG00000103290;ENSMUSG00000103254	Ighv1-18;Ighv1-22;Ighv1-26;Ighv1-31;Ighv1-34;Ighv1-42;Ighv1-81;Ighv1-23;Ighv1-15	9
A0A075B5U4;A0A075B5U7;A0A075B5V0;A0A075B5V1;A0A075B5V2;A0A075B5V6;A0A0A6YWK5;P06330	ENSMUSG00000076695;ENSMUSG00000094561;ENSMUSG00000094546;ENSMUSG00000096649;ENSMUSG00000093955;ENSMUSG00000094652	Ighv1-18;Ighv1-22;Ighv1-26;Ighv1-31;Ighv1-34;Ighv1-42	6
A0A075B5U6;A0A075B5U7;A0A075B5V0;A0A075B5V1;A0A075B5V2;A0A075B5V6;A0A075B5V7;A0A0A6YWK5;A0A0A6YX66;A0A0A6YXN5;A0A0A6YY38;P01756;P01757;P06330	ENSMUSG00000095761;ENSMUSG00000094561;ENSMUSG00000094546;ENSMUSG00000096649;ENSMUSG00000093955;ENSMUSG00000094652;ENSMUSG00000095859	Ighv1-20;Ighv1-22;Ighv1-26;Ighv1-31;Ighv1-34;Ighv1-42;Ighv1-43	7
A0A075B5U6;A0A075B5V4;A0A0A6YW32;A0A0A6YX66	ENSMUSG00000095761;ENSMUSG00000095923	Ighv1-20;Ighv1-37	2
A0A075B5U7;A0A075B5V0;A0A075B5V1;A0A075B5V2;A0A075B5V6;A0A0A6YWK5;P06330	ENSMUSG00000094561;ENSMUSG00000094546;ENSMUSG00000096649;ENSMUSG00000093955;ENSMUSG00000094652	Ighv1-22;Ighv1-26;Ighv1-31;Ighv1-34;Ighv1-42	5
A0A075B5V0;A0A075B5V1;A0A075B5V6;P01756;P01757;P06330	ENSMUSG00000094546;ENSMUSG00000096649;ENSMUSG00000094652	Ighv1-26;Ighv1-31;Ighv1-42	3
A0A075B5V8;A0A075B680;A0A0A6YXZ4;A0A0G2JFL3	ENSMUSG00000076709;ENSMUSG00000096577;ENSMUSG00000096078	Ighv1-47;Ighv1-71;Ighv1-62-2	3
A0A075B5V8;A0A075B680;A0A0A6YY41	ENSMUSG00000076709;ENSMUSG00000096577;ENSMUSG00000096078	Ighv1-47;Ighv1-71;Ighv1-62-2	3
A0A075B5W2;A0A075B5W3;A0A075B5X3;A0A0A6YXC3;P01749	ENSMUSG00000095204;ENSMUSG00000093894;ENSMUSG00000094088;ENSMUSG00000094087	Ighv1-52;Ighv1-53;Ighv1-64;Ighv1-61	4
A0A075B5W5;A0A075B5X2;A0A075B5Y6;A0A0G2JGN3;P06327	ENSMUSG00000094787;ENSMUSG00000096672;ENSMUSG00000096150;ENSMUSG00000096326	Ighv1-54;Ighv1-63;Ighv1-85;Ighv1-78	4
A0A075B5X1;A0A075B5X4;A0A075B5X8;A0A075B5Y0;A0A075B678;A0A0A6YW58;A0A0A6YXQ0;A0A0A6YY60;A0A0G2JET1	ENSMUSG00000095117;ENSMUSG00000095170;ENSMUSG00000076731;ENSMUSG00000076733;ENSMUSG00000102301;ENSMUSG00000104452;ENSMUSG00000102364	Ighv8-9;Ighv8-11;Ighv8-12;Ighv8-13;Ighv8-2;Ighv8-8;Ighv8-5	7
A0A075B5X8;A0A075B5Y0;A0A075B678;A0A0G2JDE1	ENSMUSG00000076731;ENSMUSG00000076733	Ighv8-12;Ighv8-13	2
A0A075B5Y4;A0A0A6YVW3;A0A0A6YXA5	ENSMUSG00000094689;ENSMUSG00000103290;ENSMUSG00000103254	Ighv1-81;Ighv1-23;Ighv1-15	3
A0A075B663;A0A075B664;P01723;P01726;P01727;P01728	ENSMUSG00000076934;ENSMUSG00000076940	Iglv1;Iglv2	2
A0A075B666;A0A140T8N3	ENSMUSG00000079543;ENSMUSG00000076538	Igkv13-85;Igkv13-84	2
A0A075B680;A0A0A6YXZ4;A0A0G2JFL3	ENSMUSG00000096577;ENSMUSG00000096078	Ighv1-71;Ighv1-62-2	2
A0A087WNL7;A0A087WNX7;A0A087WP63;A0A087WQ44	ENSMUSG00000053877;ENSMUSG00000107023	Srcap;Gm42715	2
A0A087WNL7;A0A087WNX7;A0A087WP63;A0A087WQ44;A0A087WQY5;E9Q9V7	ENSMUSG00000053877;ENSMUSG00000107023	Srcap;Gm42715	2
A0A087WNM1;D3YZW1;Q91Z67;Q91Z69	ENSMUSG00000026425;ENSMUSG00000020121	Srgap2;Srgap1	2
A0A087WNM2;A0A087WQ57;A0A087WR08;A2AP81;A2AP82;Q6NZA9;Q8VI33	ENSMUSG00000052293;ENSMUSG00000047242	Taf9;Taf9b	2
A0A087WNM2;A0A087WQ57;A0A087WR08;A2AP82;Q6NZA9;Q8VI33	ENSMUSG00000052293;ENSMUSG00000047242	Taf9;Taf9b	2
A0A087WNZ5;A0A087WRP7;P0CW02;P0CW03	ENSMUSG00000079018;ENSMUSG00000022584	Ly6c1;Ly6c2	2
A0A087WP01;A0A140T8I4;A0A1W2P7T2;A0A1W2P7U1;A0A1W2P7U9;A0A1W2P8B1;Q8CFI2	ENSMUSG00000020870;ENSMUSG00000020307	Cdc34b;Cdc34	2
A0A087WP01;A0A140T8I4;A0A1W2P7U1;A0A1W2P7U9;A0A1W2P8B1;Q8CFI2	ENSMUSG00000020870;ENSMUSG00000020307	Cdc34b;Cdc34	2
A0A087WP01;A0A140T8I4;A0A1W2P7U1;A0A1W2P7U9;Q8CFI2	ENSMUSG00000020870;ENSMUSG00000020307	Cdc34b;Cdc34	2
A0A087WP01;A0A140T8I4;A0A1W2P7U1;Q8CFI2	ENSMUSG00000020870;ENSMUSG00000020307	Cdc34b;Cdc34	2
A0A087WPA0;J3QPQ6	ENSMUSG00000096740;ENSMUSG00000116166	Lbhd1;Gm49403	2
A0A087WPE2;B2KF83;F6Q785;L7N466;Q8R1G5;Q9D110	ENSMUSG00000066442;ENSMUSG00000100838;ENSMUSG00000079427	Mthfs;Gm29094;Mthfsl	3
A0A087WPP1;A0A087WPZ8;A0A087WQJ4;A0A087WQT9;A0A087WR02;A0A087WRM3;A0A087WRZ6;A0A087WS40;A0A087WS67;A0A087WSE7;A0A1W2P6T3;A0A1W2P6Z7;A0A1W2P731;A0A1W2P805;A0A286YD72;A0A2C9F2E5;A0A571BDT1;A0A571BEQ4;A0A589Q4M7;C7TQ57;C7TQ59;F7C376;F8WJL1;Q01815;Q01815-2;Q01815-3;Q0PCR6;Q99246;Q99246-3;Q99246-4	ENSMUSG00000051331;ENSMUSG00000015968	Cacna1c;Cacna1d	2
A0A087WPY5;E9Q007;Q61767	ENSMUSG00000090817;ENSMUSG00000095143;ENSMUSG00000095388	Hsd3b9;Hsd3b4;Hsd3b8	3
A0A087WPY5;Q61767	ENSMUSG00000090817;ENSMUSG00000095143;ENSMUSG00000095388	Hsd3b9;Hsd3b4;Hsd3b8	3
A0A087WPZ3;A0A087WRV9;A0A494B958;A0A494B9U0;A0A494BA52;A0A494BB27;H3BL39;O70477;Q8BG99	ENSMUSG00000035934;ENSMUSG00000006705	Pknox2;Pknox1	2
A0A087WQJ0;D2XZ31;E9PWZ2	ENSMUSG00000101401;ENSMUSG00000101638;ENSMUSG00000078757;ENSMUSG00000078759;ENSMUSG00000094978	Scgb1b18;Scgb1b11;Scgb1b29;Scgb1b7;Scgb1b20	5
A0A087WQJ0;D2XZ31;E9PWZ2;J3QJY4	ENSMUSG00000101401;ENSMUSG00000101638;ENSMUSG00000078757;ENSMUSG00000078759;ENSMUSG00000094978;ENSMUSG00000095257	Scgb1b18;Scgb1b11;Scgb1b29;Scgb1b7;Scgb1b20;Scgb1b3	6
A0A087WQJ5;A0A087WRC2;Q9D937	ENSMUSG00000071653;ENSMUSG00000116347	1810009A15Rik;Gm49416	2
A0A087WQP8;A0A0G2JE01;D3YYI9;D3Z6R1;D3Z7H5;E9Q1C7;E9Q4E0;E9QAN3;J3QK71;K7N5V5;K7N660;K7N6S0;Q9D9F7	ENSMUSG00000104824;ENSMUSG00000059645;ENSMUSG00000091049;ENSMUSG00000073116;ENSMUSG00000051940;ENSMUSG00000067700;ENSMUSG00000067698;ENSMUSG00000048703	Gm21663;Gm7361;Gm1979;Gm10471;5031410I06Rik;Gm5862;Gm10220;Speer4b	8
A0A087WQQ3;A0A087WRE9;O35730;O35730-2;O35730-3;Q9CQJ4	ENSMUSG00000026484;ENSMUSG00000024325	Rnf2;Ring1	2
A0A087WR13;A0A571BD48;L7N1Y0	ENSMUSG00000101337;ENSMUSG00000041144	Dnah7c;Dnah7b	2
A0A087WR27;A0A1B0GT13;D3Z1G5;D3Z5Y8;D3Z5Z2;E9QAG8;K7N6R7	ENSMUSG00000066613;ENSMUSG00000090963	Zfp932;Gm17655	2
A0A087WR27;D3Z5Y8;D3Z5Z2;E9QAG8;K7N6R7;Q6PEE4	ENSMUSG00000066613;ENSMUSG00000059423	Zfp932;Zfp933	2
A0A087WR32;A0A087WSL3;Q60749;Q9WU01;Q9WU01-2	ENSMUSG00000026058;ENSMUSG00000028790	Khdrbs2;Khdrbs1	2
A0A087WR43;P41230;P41230-2;Q62240;Q62240-2;Q62240-3;Q62240-4;Q8BQM3	ENSMUSG00000056673;ENSMUSG00000025332	Kdm5d;Kdm5c	2
A0A087WRC2;Q9D937	ENSMUSG00000116347;ENSMUSG00000071653	Gm49416;1810009A15Rik	2
A0A087WRG0;A0A087WRM7;A0A0A6YW89;A0A0A6YY64;A2AUP1;A2AUP3;A2AUP4;A2AUP5;A7UAK4;A7UAK5;A7UAK8;B2Z891;B2Z892;B2Z893;B2Z894;P70265;Q3U3S6;Q6GTL7;Q7TS91	ENSMUSG00000026409;ENSMUSG00000026773;ENSMUSG00000101904	Pfkfb2;Pfkfb3;Gm29427	3
A0A087WRG0;A0A087WRM7;B2Z891;B2Z892;B2Z893;B2Z894;P70265;Q6GTL7	ENSMUSG00000026409;ENSMUSG00000101904	Pfkfb2;Gm29427	2
A0A087WRG0;A0A087WRM7;B2Z892;B2Z893;B2Z894;P70265;Q6GTL7	ENSMUSG00000026409;ENSMUSG00000101904	Pfkfb2;Gm29427	2
A0A087WRH2;D3Z3C1;J3QPY3;Q9WUD8	ENSMUSG00000032463;ENSMUSG00000096316	Faim;Faiml	2
A0A087WRI5;Q8VCP8	ENSMUSG00000078941;ENSMUSG00000052293	Ak6;Taf9	2
A0A087WRI6;D3Z2U7;D3Z326;D3Z6A5;D3Z7M6;D3Z7P7;E9PWV9;F6Q346;F6QKL8;F6QWT6;F6U9F5;F6VJ22;F6W4F5;P27699-10;P27699-11;P27699-2;P27699-5;P27699-6;P27699-7;P27699-8;P81269;Q01147;Q01147-1;Q62347	ENSMUSG00000025958;ENSMUSG00000063889;ENSMUSG00000023027	Creb1;Crem;Atf1	3
A0A087WRL6;A2ARR7;A2ART0;A2ARW8;A2ARX1;A2AW67;A2BFG5;E9QA51	ENSMUSG00000095362;ENSMUSG00000078868;ENSMUSG00000078903;ENSMUSG00000078887;ENSMUSG00000090093;ENSMUSG00000078862	Gm14325;Gm14412;Gm14391;Gm6710;Gm14399;Gm14326	6
A0A087WRL6;A2ART0;A2ART4;A2ARW8;A2ARX1;A2AW67;A2BFG5;E9QA51;F7CEW8		Gm14325;Gm14391;Gm6710;Gm2007;Gm4631;Gm4724;Gm2026;Gm14434;Gm14308;Gm14430;Gm14399;Gm14326	12
A0A087WRZ7;A0A0G2JDM3;A0A0G2JDW2;E9PWG4;P05977;P05977-2;P09542	ENSMUSG00000061816;ENSMUSG00000059741	Myl1;Myl3	2
A0A087WSB3;D3YYZ3;D3Z674;D3Z678;E9Q1Z6;F6PZL4;P97484	ENSMUSG00000074419;ENSMUSG00000074417;ENSMUSG00000058818	Pira13;Pira12;Pirb	3
A0A087WSK7;Q921I0	ENSMUSG00000100679;ENSMUSG00000026097	Gm28778;Ormdl1	2
A0A087WSK7;Q921I0;Q9CQZ0	ENSMUSG00000100679;ENSMUSG00000026097;ENSMUSG00000025353	Gm28778;Ormdl1;Ormdl2	3
A0A088MLT8;A0A088MLT8-2;A0A0A6YXQ5;P0DPB4;P0DPB4-2;P0DPB4-3;P0DPB4-4;S4R1J0	ENSMUSG00000102422;ENSMUSG00000027777	Iqschfp;Schip1	2
A0A0A0MQ80;A0A0G2JFY0;D3Z0U5;D3Z4J2;D6RGM7;Q3UMC0;Q9D3R6;Q9D3R6-3	ENSMUSG00000027722;ENSMUSG00000025420	Spata5;Katnal2	2
A0A0A0MQA3;A0A0R4J0X5;P07758;Q00896	ENSMUSG00000066366;ENSMUSG00000079015;ENSMUSG00000071177	Serpina1a;Serpina1c;Serpina1d	3
A0A0A0MQA3;P07758	ENSMUSG00000066366;ENSMUSG00000071177	Serpina1a;Serpina1d	2
A0A0A0MQA5;A0A2R8VHF3;P05213;P68368	ENSMUSG00000026202;ENSMUSG00000116358;ENSMUSG00000023004	Tuba4a;Gm49450;Tuba1b	3
A0A0A0MQB8;B1AWK4;H3BLB6;P97367;P97367-2;P97367-3;P97367-4;Q3TYM2;Q60954;Q60954-2;Q60954-3;V9GXB5	ENSMUSG00000020160;ENSMUSG00000027210	Meis1;Meis2	2
A0A0A0MQE0;A0A0A0MQM6;A0A0R4J1Z4;E9Q6Z8;F8VQL7;H3BJT4;H3BKB7;I1E4X2;P25425;P25425-10;P25425-11;P25425-12;P25425-2;P25425-3;P25425-4;P25425-5;P25425-6;P25425-7;P25425-8;P25425-9;P31362;Q00196;Q00196-2;Q00196-3;Q00196-4;Q00196-5;Q00196-6;Q00196-7;Q3U5D1	ENSMUSG00000026565;ENSMUSG00000032015;ENSMUSG00000008496	Pou2f1;Pou2f3;Pou2f2	3
A0A0A0MQE0;A0A0A0MQM6;A0A0R4J1Z4;E9Q6Z8;F8VQL7;H3BKB7;I1E4X2;P25425;P25425-10;P25425-11;P25425-12;P25425-2;P25425-3;P25425-4;P25425-5;P25425-6;P25425-7;P25425-8;P25425-9;Q00196;Q00196-2;Q00196-3;Q00196-4;Q00196-5;Q00196-6;Q00196-7;Q3U5D1	ENSMUSG00000026565;ENSMUSG00000008496;ENSMUSG00000032015	Pou2f1;Pou2f2;Pou2f3	3
A0A0A0MQE0;A0A0A0MQM6;A0A0R4J1Z4;E9Q6Z8;F8VQL7;I1E4X2;P25425;P25425-10;P25425-11;P25425-12;P25425-2;P25425-3;P25425-4;P25425-5;P25425-6;P25425-7;P25425-8;P25425-9;Q3U5D1	ENSMUSG00000026565;ENSMUSG00000032015	Pou2f1;Pou2f3	2
A0A0A0MQE2;Q8CHX6	ENSMUSG00000091736;ENSMUSG00000046873	Yy2;Mbtps2	2
A0A0A0MQF6;A0A1D5RLD8;P16858;S4R1W1;S4R257	ENSMUSG00000057666;ENSMUSG00000110469;ENSMUSG00000097148	Gapdh;Gm10358;Gm3839	3
A0A0A0MQF6;A0A1D5RLD8;P16858;S4R257	ENSMUSG00000057666;ENSMUSG00000110469	Gapdh;Gm10358	2
A0A0A0MQF6;P16858;S4R1W1;S4R257	ENSMUSG00000057666;ENSMUSG00000097148	Gapdh;Gm3839	2
A0A0A0MQJ4;A0A0A0MQL5;A0A5F8MPG5;A0A5F8MPI2;B1B1B8;Q2M3X8;Q2M3X8-2;Q2M3X8-3;Q2M3X8-4;Q501J7;Q501J7-2;Q501J7-3	ENSMUSG00000066043;ENSMUSG00000054728	Phactr4;Phactr1	2
A0A0A0MQM0;J3QPS8;P63242;Q8BGY2	ENSMUSG00000078812;ENSMUSG00000050192	Eif5a;Eif5a2	2
A0A0A0MQM0;P63242;Q8BGY2	ENSMUSG00000078812;ENSMUSG00000050192	Eif5a;Eif5a2	2
A0A0A6YVQ7;P61620;Q9CYJ6;Q9JLR1	ENSMUSG00000025816;ENSMUSG00000030082	Sec61a2;Sec61a1	2
A0A0A6YVS5;O88689-3;Q6DD96;Q91XW9;Q91XX0;Q91XX1;Q91XX3;Q91XX4;Q91XX5;Q91XX6;Q91XX7;Q91XX8;Q91XX9;Q91XY0;Q91XY2;Q91XY3;Q91XY4;Q91XY5;Q91XY6;Q91XY7;Q91XY8;Q91XY9;Q91XZ0	ENSMUSG00000023036;ENSMUSG00000103458;ENSMUSG00000104252;ENSMUSG00000103472;ENSMUSG00000102543;ENSMUSG00000102918;ENSMUSG00000104063;ENSMUSG00000103088;ENSMUSG00000103749;ENSMUSG00000103585;ENSMUSG00000102748;ENSMUSG00000103037;ENSMUSG00000102440;ENSMUSG00000103897;ENSMUSG00000103793;ENSMUSG00000103567;ENSMUSG00000103677;ENSMUSG00000104346;ENSMUSG00000103332;ENSMUSG00000102428;ENSMUSG00000102742;…	Pcdhgc4;Gm37013;Pcdha4;Pcdhga7;Pcdhgc5;Pcdhgc3;Pcdhgb7;Pcdhgb6;Pcdhgb5;Pcdhgb4;Pcdhgb2;Pcdhgb1;Pcdhga9;Pcdhga8;Pcdhga6;Pcdhga5;Pcdhga4;Pcdhga3;Pcdhga2;Pcdhga12;Pcdhga11;Pcdhga10;Pcdhga1	23
A0A0A6YVU6;Q6DD96;Q91XX9;Q91XY4;Q91XY5;Q91XY8	ENSMUSG00000103677;ENSMUSG00000103472;ENSMUSG00000102440;ENSMUSG00000104346;ENSMUSG00000102742	Pcdhga4;Pcdhga7;Pcdhga9;Pcdhga3;Pcdhga11	5
A0A0A6YVU8;D3YUD8;Q9JKV1	ENSMUSG00000042165;ENSMUSG00000039041	Gm9774;Adrm1	2
A0A0A6YVY7;A0A0A6YW28;P35123;Q99K46	ENSMUSG00000032612;ENSMUSG00000031066	Usp4;Usp11	2
A0A0A6YVZ8;A0A0A6YW53;A0A0A6YWM8;A0A0A6YWR8;B2RUE8;B7ZNR9;E9PVG7;F7AMS7;F8VPL5;G3X9G2;P83510-2;P97820;Q5SXG1;Q5SXG3;Q9JM52;Q9JM52-2;Q9JM52-3	ENSMUSG00000026074;ENSMUSG00000020827;ENSMUSG00000027692	Map4k4;Mink1;Tnik	3
A0A0A6YW33;A0A2I3BPG9;P83882	ENSMUSG00000104043;ENSMUSG00000060377;ENSMUSG00000049751;ENSMUSG00000079435	Gm6525;Rpl36a-ps1;Rpl36al;Rpl36a	4
A0A0A6YW67;E9Q4P0;E9Q5F6;E9Q9J0;E9QNP0;P0CG49;P0CG50;P62983;P62984;Q5SX22	ENSMUSG00000103034;ENSMUSG00000055553;ENSMUSG00000008348;ENSMUSG00000090137;ENSMUSG00000019505;ENSMUSG00000020460	Gm8797;Kxd1;Ubc;Uba52;Ubb;Rps27a	6
A0A0A6YW67;E9Q4P0;E9Q5F6;E9Q9J0;E9QNP0;P0CG49;P0CG50;P62984;Q5SX22	ENSMUSG00000103034;ENSMUSG00000055553;ENSMUSG00000008348;ENSMUSG00000090137;ENSMUSG00000019505	Gm8797;Kxd1;Ubc;Uba52;Ubb	5
A0A0A6YW67;E9Q4P0;E9Q5F6;E9Q9J0;E9QNP0;P0CG49;P62983;P62984;Q5SX22	ENSMUSG00000103034;ENSMUSG00000055553;ENSMUSG00000008348;ENSMUSG00000090137;ENSMUSG00000019505;ENSMUSG00000020460	Gm8797;Kxd1;Ubc;Uba52;Ubb;Rps27a	6
A0A0A6YW67;E9Q4P0;E9Q5F6;E9Q9J0;P0CG49;P0CG50;P62983;Q5SX22	ENSMUSG00000103034;ENSMUSG00000055553;ENSMUSG00000008348;ENSMUSG00000090137;ENSMUSG00000019505;ENSMUSG00000020460	Gm8797;Kxd1;Ubc;Uba52;Ubb;Rps27a	6
A0A0A6YW67;E9Q5F6;E9Q9J0;P0CG49;P0CG50;P62983;P62984;Q5SX22	ENSMUSG00000103034;ENSMUSG00000008348;ENSMUSG00000090137;ENSMUSG00000019505;ENSMUSG00000020460	Gm8797;Ubc;Uba52;Ubb;Rps27a	5
A0A0A6YW67;E9Q5F6;P0CG49;P0CG50;P62983;Q5SX22	ENSMUSG00000103034;ENSMUSG00000008348;ENSMUSG00000019505;ENSMUSG00000020460	Gm8797;Ubc;Ubb;Rps27a	4
A0A0A6YWG7;A0A5F8MPT3;B2RUJ6;E9QNQ4;Q5NCJ0;Q5NCJ1;Q5NCJ4;Q5NCJ5;Q8CHG7	ENSMUSG00000062232;ENSMUSG00000037533	Rapgef2;Rapgef6	2
A0A0A6YWP7;A0A0A6YWY4;A0A0A6YXM5;A0A140T8R7;Q6PGA0;Q6PGA0-2;Q8CFE3	ENSMUSG00000037395;ENSMUSG00000037896	Rcor3;Rcor1	2
A0A0A6YWR6;A0A0A6YY33;H7BX69;Q811H0;Q811H0-2;Q9WUK6	ENSMUSG00000063659;ENSMUSG00000037638	Zbtb18;Zbtb42	2
A0A0A6YWX5;A0A0R4J194;A2A542;A2A543;A2A545;C7IVS7;J3QK20;Q8CC27;Q8CC27-2;Q8CC27-3;Q8CC27-4;Q8R0S4;Q8R0S4-1;Q8R0S4-2;Q8R3Z5;Q8R3Z5-2;Q8R3Z5-3;Q8R3Z5-4	ENSMUSG00000057914;ENSMUSG00000020882;ENSMUSG00000017412	Cacnb2;Cacnb1;Cacnb4	3
A0A0A6YXF6;A0A0G2JEP8;H3BL56;Q62159;Q9CR99;Q9QUI0	ENSMUSG00000007815;ENSMUSG00000002233;ENSMUSG00000036463	Rhoa;Rhoc;4930544G11Rik	3
A0A0A6YXF6;A0A0G2JEP8;H3BL56;Q62159;Q9QUI0	ENSMUSG00000007815;ENSMUSG00000002233	Rhoa;Rhoc	2
A0A0A6YXF6;Q62159;Q9QUI0	ENSMUSG00000007815;ENSMUSG00000002233	Rhoa;Rhoc	2
A0A0A6YXF6;Q9CR99;Q9QUI0	ENSMUSG00000007815;ENSMUSG00000036463	Rhoa;4930544G11Rik	2
A0A0A6YXV9;E9PVL3;Q504N7;Q8BV49	ENSMUSG00000043263;ENSMUSG00000070501	Ifi209;Ifi214	2
A0A0A6YXX6;Q3TWW8;Q542V3;Q8VE97	ENSMUSG00000016921;ENSMUSG00000028911	Srsf6;Srsf4	2
A0A0A6YY00;O35963;P97950	ENSMUSG00000027739;ENSMUSG00000031104	Rab33b;Rab33a	2
A0A0B4J1F7;Q61249;Q9QZ29	ENSMUSG00000046717;ENSMUSG00000031221	Igbp1b;Igbp1	2
A0A0B4J1H7;A0A0B4J1H8	ENSMUSG00000096336;ENSMUSG00000094491	Igkv1-135;Igkv1-133	2
A0A0G2JDJ5;A0A0G2JEA5;A0A0G2JEB3;Q920E5	ENSMUSG00000059743;ENSMUSG00000105204	Fdps;Gm43738	2
A0A0G2JDK0;A0A0G2JDQ1;A0A0G2JDT0;A0A0G2JE18;A0A0G2JEC2;A0A0G2JES4;A0A0G2JET3;A0A0G2JFI7;A0A0G2JFL7;A0A0G2JFS4;A0A0G2JFX1;A0A0G2JFX2;A0A0G2JGK3;A0A0G2JGL3;A0A0H2UH28;A0A0H2UKB6;D3Z6M5;E9Q5E0;E9QKT0;Q60929;Q60929-2;Q60929-3;Q63943;Q63943-2;Q8CFN5;Q8CFN5-2;Q8CFN5-3;Q8CFN5-4;Q8CFN5-5;Q921S6;S4R2H4	ENSMUSG00000005583;ENSMUSG00000030557;ENSMUSG00000001419	Mef2c;Mef2a;Mef2d	3
A0A0G2JDK0;A0A0G2JDQ1;A0A0G2JDT0;A0A0G2JE18;A0A0G2JEC2;A0A0G2JES4;A0A0G2JET3;A0A0G2JFI7;A0A0G2JFL7;A0A0G2JFS4;A0A0G2JFX1;A0A0G2JFX2;A0A0G2JGK3;A0A0G2JGL3;A0A0H2UH28;A0A0H2UKB6;D3Z6M5;Q60929;Q60929-2;Q8CFN5;Q8CFN5-2;Q8CFN5-3;Q8CFN5-4;Q8CFN5-5;S4R2H4	ENSMUSG00000005583;ENSMUSG00000030557	Mef2c;Mef2a	2
A0A0G2JDK0;A0A0G2JDQ1;A0A0G2JDT0;A0A0G2JE18;A0A0G2JEC2;A0A0G2JET3;A0A0G2JFI7;A0A0G2JFX2;A0A0G2JGK3;A0A0G2JGL3;A0A0H2UH28;A0A0H2UKB6;D3Z6M5;Q60929;Q60929-2;Q8CFN5;Q8CFN5-2;Q8CFN5-3;Q8CFN5-4;Q8CFN5-5	ENSMUSG00000005583;ENSMUSG00000030557	Mef2c;Mef2a	2
A0A0G2JDL2;A0A0G2JDX3;A0A0G2JF00;A0A0G2JFA4;A0A0G2JGE2;A0A0G2JGX2;A0A5F8MPH2;D3YU11;D3YX51;D3Z4T1;D3Z580;D6RGB9;D6RHP1;Q7TN33;Q7TN33-2;Q8CIN6;Q8CIN6-2	ENSMUSG00000028137;ENSMUSG00000034818;ENSMUSG00000032297	Celf3;Celf5;Celf6	3
A0A0G2JDM0;A0A0G2JDN9;A0A0G2JEA2;A0A0G2JGV7;A0A140T8R8;A0A1B0GXL7;A0A1Y7VP24;Q3UT23;Q9QZ73	ENSMUSG00000027708;ENSMUSG00000113255	Dcun1d1;Tes3-ps	2
A0A0G2JDM0;A0A0G2JGV7;A0A140T8R8;A0A1Y7VP24;Q3UT23;Q9QZ73	ENSMUSG00000027708;ENSMUSG00000113255	Dcun1d1;Tes3-ps	2
A0A0G2JDM0;A0A1Y7VP24;Q9QZ73	ENSMUSG00000027708;ENSMUSG00000113255	Dcun1d1;Tes3-ps	2
A0A0G2JDP9;P22723;P22723-2;Q8C7N0;Q9R0Y8	ENSMUSG00000001260;ENSMUSG00000020436	Gabrg1;Gabrg2	2
A0A0G2JDQ2;A0A0G2JFY6;B0V3P3;B0V3P4;Q9WV76	ENSMUSG00000032952;ENSMUSG00000105053	Ap4b1;Gm43064	2
A0A0G2JDU2;O54992;O54992-2;O54992-3;O54992-4;O54992-5	ENSMUSG00000105340;ENSMUSG00000029454	Gm42878;Mapkapk5	2
A0A0G2JDV3;L7N1X8;Q000W5	ENSMUSG00000104713;ENSMUSG00000079362;ENSMUSG00000105096	Gbp6;Gm43302;Gbp10	3
A0A0G2JDV3;L7N1X8;Q000W5;Q2V6D6;Q8BTS3	ENSMUSG00000104713;ENSMUSG00000079362;ENSMUSG00000105096;ENSMUSG00000034438;ENSMUSG00000029298	Gbp6;Gm43302;Gbp10;Gbp8;Gbp9	5
A0A0G2JDW7;A0A0G2JEX7;A0A0G2JG29;Q6ZWU9	ENSMUSG00000050621;ENSMUSG00000090733	Rps27rt;Rps27	2
A0A0G2JDW7;A0A0G2JG29;Q6ZWU9	ENSMUSG00000050621;ENSMUSG00000090733	Rps27rt;Rps27	2
A0A0G2JDW7;A0A0G2JG29;Q6ZWU9;Q6ZWY3	ENSMUSG00000050621;ENSMUSG00000090733;ENSMUSG00000036781	Rps27rt;Rps27;Rps27l	3
A0A0G2JDZ4;A0A0G2JE15;D3YUI7;D3YW14;D3Z0I3;E9Q8Y0;E9QNY3;F6RBQ5;P51667;Q62082;Q62082-2;Q62082-3	ENSMUSG00000005474;ENSMUSG00000013936	Myl10;Myl2	2
A0A0G2JDZ9;A0A1W2P6X1;E9PUR0;E9Q1M6;E9Q804;E9QKG6;Q99NH0;Q99NH0-2;Q99NH0-3	ENSMUSG00000055204;ENSMUSG00000024483	Ankrd17;Ankhd1	2
A0A0G2JE25;A0A0G2JGP4;P08556;P32883;Q61411;Q9D091	ENSMUSG00000027852;ENSMUSG00000030265;ENSMUSG00000025499	Nras;Kras;Hras	3
A0A0G2JE27;A0A0N4SVM0;D6RCW7;P47753;P47754;Q5RKN9	ENSMUSG00000070372;ENSMUSG00000015733	Capza1;Capza2	2
A0A0G2JE32;A0A0G2JF40;A0A0G2JGL0;A0A0G2JGZ3;A0A494BA56;A0A494BAN1;P61079;Q05CK8	ENSMUSG00000078578;ENSMUSG00000091896	Ube2d3;Ube2d2a	2
A0A0G2JE32;A0A0G2JGL0;A0A494BA56;A0A494BAN1;P61079	ENSMUSG00000078578;ENSMUSG00000091896	Ube2d3;Ube2d2a	2
A0A0G2JE32;A0A0G2JGL0;A0A494BA56;A0A494BAN1;P61079;P62838	ENSMUSG00000078578;ENSMUSG00000091896	Ube2d3;Ube2d2a	2
A0A0G2JE32;A0A0G2JGL0;A0A494BA56;A0A494BAN1;P61079;P62838;Q6ZWY6	ENSMUSG00000078578;ENSMUSG00000091896;ENSMUSG00000063447	Ube2d3;Ube2d2a;Ube2d2b	3
A0A0G2JE32;A0A0G2JGL0;A0A494BAN1;P61079	ENSMUSG00000078578;ENSMUSG00000091896	Ube2d3;Ube2d2a	2
A0A0G2JE32;A0A0G2JGL0;A0A494BAN1;P61079;P62838	ENSMUSG00000078578;ENSMUSG00000091896	Ube2d3;Ube2d2a	2
A0A0G2JE35;A0A0G2JEH1;A0A0G2JEU0;A0A0G2JEU6;A0A0G2JFA1;B1AXI2;B1AXI4;B1AXI6;E0CX56;E0CYU0;E9PYK8;E9Q3I3;Q3UTH8;Q3UTH8-2;Q3UTH8-3;Q3UTH8-4;Q5DU57;Q5DU57-2;Q7TNR9;S4R1K5	ENSMUSG00000025656;ENSMUSG00000037509;ENSMUSG00000021990	Arhgef9;Arhgef4;Spata13	3
A0A0G2JE35;A0A0G2JEH1;A0A0G2JEU6;A0A0G2JFA1;B1AXI2;B1AXI4;B1AXI6;E0CX56;E0CYU0;E9PYK8;E9Q3I3;Q3UTH8;Q3UTH8-2;Q3UTH8-3;Q3UTH8-4;Q5DU57;Q5DU57-2;Q7TNR9;S4R1K5	ENSMUSG00000025656;ENSMUSG00000037509;ENSMUSG00000021990	Arhgef9;Arhgef4;Spata13	3
A0A0G2JEA5;Q8BG26-2	ENSMUSG00000105204;ENSMUSG00000041263	Gm43738;Rusc1	2
A0A0G2JEA5;Q920E5	ENSMUSG00000105204;ENSMUSG00000059743	Gm43738;Fdps	2
A0A0G2JEA9;A0A0G2JFX7;A0A0N4SUH6;Q9CWZ3	ENSMUSG00000038374;ENSMUSG00000078184	Rbm8a;Rbm8a2	2
A0A0G2JEA9;A0A0G2JFX7;A0A0N4SUH6;Q9CWZ3;Q9CWZ3-2	ENSMUSG00000038374;ENSMUSG00000078184	Rbm8a;Rbm8a2	2
A0A0G2JEI3;A0A0G2JER9;A0A0G2JGN9;G3X8S5;O54946;O54946-2;Q9QYI8	ENSMUSG00000029131;ENSMUSG00000047108	Dnajb6;Dnajb7	2
A0A0G2JEL6;D3YY63;D3Z0X7;E9PX91;F6TVX7;F7C386;Q8BSF4	ENSMUSG00000023452;ENSMUSG00000093574	Pisd;Gm20671	2
A0A0G2JES3;A0A140T8T4;D3YZT0;D3Z629;P51410	ENSMUSG00000047215;ENSMUSG00000062456	Rpl9;Rpl9-ps6	2
A0A0G2JES3;A0A140T8T4;D3Z629;P51410	ENSMUSG00000047215;ENSMUSG00000062456	Rpl9;Rpl9-ps6	2
A0A0G2JES3;A0A140T8T4;P51410	ENSMUSG00000047215;ENSMUSG00000062456	Rpl9;Rpl9-ps6	2
A0A0G2JEY6;A0A0G2JGY8;Q9D1R9	ENSMUSG00000062006;ENSMUSG00000068396	Rpl34;Rpl34-ps1	2
A0A0G2JEY6;Q9D1R9	ENSMUSG00000062006;ENSMUSG00000068396	Rpl34;Rpl34-ps1	2
A0A0G2JFD5;A0A0G2JFY7;A0A0G2JGJ6;G3UXD1;J3QMF9;K7N6S8;K7N6W5;Q80ZT2;Q8C5Y0	ENSMUSG00000096878;ENSMUSG00000099762;ENSMUSG00000106445;ENSMUSG00000073208;ENSMUSG00000091255;ENSMUSG00000091897;ENSMUSG00000033219;ENSMUSG00000069720	Gm21083;Gm21149;Gm21190;Speer4c;Speer4e;Gm17019;Gm9758;4930572O03Rik	8
A0A0G2JFS9;A0A7N9VS64;A0A7N9VT17;Q8C9S8	ENSMUSG00000087119;ENSMUSG00000079418	Atg4a-ps;Atg4a	2
A0A0G2JFX7;A0A0N4SUH6;Q9CWZ3	ENSMUSG00000038374;ENSMUSG00000078184	Rbm8a;Rbm8a2	2
A0A0G2JFX7;A0A0N4SUH6;Q9CWZ3;Q9CWZ3-2	ENSMUSG00000038374;ENSMUSG00000078184	Rbm8a;Rbm8a2	2
A0A0G2JFY6;B0V3P3;B0V3P4;Q9WV76	ENSMUSG00000032952;ENSMUSG00000105053	Ap4b1;Gm43064	2
A0A0G2JFZ4;D3YW86;D3Z0V7;E9Q7M2;E9QLZ1;H3BLI9;P62500;P62500-2;P62500-3	ENSMUSG00000027806;ENSMUSG00000022010	Tsc22d2;Tsc22d1	2
A0A0G2JGN4;P27048;P63163	ENSMUSG00000027404;ENSMUSG00000102252	Snrpb;Snrpn	2
A0A0G2JGQ8;P01844;P01845;Q99JC1	ENSMUSG00000105547;ENSMUSG00000076937	Iglc3;Iglc2	2
A0A0G2JGR2;D3YYP6;F8WHW8;Q91VT8	ENSMUSG00000105835;ENSMUSG00000037822	Gm43552;Smim14	2
A0A0G2JGS8;F6WUM4;F6ZYH6;P50571;P63080;Q8C446	ENSMUSG00000029212;ENSMUSG00000033676	Gabrb1;Gabrb3	2
A0A0G2JGS8;P63137;P63137-2	ENSMUSG00000029212;ENSMUSG00000007653	Gabrb1;Gabrb2	2
A0A0G2JGV7;A0A140T8R8;A0A1Y7VP24;Q3UT23;Q9QZ73	ENSMUSG00000027708;ENSMUSG00000113255	Dcun1d1;Tes3-ps	2
A0A0H2UH22;A0A0R4J102;D3YUJ4;D3Z1R6;D3Z5R9;E9Q5X2;E9Q969;F6T0J8;Q7TN99;Q7TN99-2;Q7TN99-3;Q7TN99-4;Q7TN99-5;Q7TN99-6;Q812E0	ENSMUSG00000039782;ENSMUSG00000039652	Cpeb2;Cpeb3	2
A0A0H2UH22;A0A0R4J102;D3Z1R6;D3Z5R9;E9Q5X2;E9Q969;F6T0J8;Q5SU47;Q5SU48;Q7TN98;Q7TN98-2;Q7TN98-3;Q7TN98-4;Q7TN98-5;Q7TN99;Q7TN99-2;Q7TN99-3;Q7TN99-4;Q7TN99-6;Q812E0	ENSMUSG00000039782;ENSMUSG00000039652;ENSMUSG00000020300	Cpeb2;Cpeb3;Cpeb4	3
A0A0H2UH22;A0A0R4J102;D3Z1R6;D3Z5R9;E9Q5X2;E9Q969;F6T0J8;Q7TN99;Q7TN99-2;Q7TN99-3;Q7TN99-4;Q7TN99-5;Q7TN99-6;Q812E0	ENSMUSG00000039782;ENSMUSG00000039652	Cpeb2;Cpeb3	2
A0A0J9YTS5;P70325;P70326;Q8BSY3	ENSMUSG00000018263;ENSMUSG00000000094	Tbx5;Tbx4	2
A0A0J9YTW3;A0A0J9YU62;A0A0J9YUM4;E9PWQ9;E9Q0T4;O88712;O88712-2;O88712-3;P56546;P56546-2;Q91YZ2	ENSMUSG00000037373;ENSMUSG00000030970	Ctbp1;Ctbp2	2
A0A0J9YU36;D3YUX6;Q6PDD0;Q80X89	ENSMUSG00000107180;ENSMUSG00000029268;ENSMUSG00000106677	Gm43638;Ugt2a2;Ugt2a1	3
A0A0J9YUB4;A0A0U1RQA9;F6V0H0;G3UZB0;Q99L02	ENSMUSG00000107068;ENSMUSG00000092534	Pagr1a;Pagr1b	2
A0A0J9YUB4;F6V0H0;G3UZB0;Q99L02	ENSMUSG00000107068;ENSMUSG00000092534	Pagr1a;Pagr1b	2
A0A0J9YUD4;A0A1W2P6H7;F7AFE4	ENSMUSG00000096795;ENSMUSG00000112640	Zfp433;Gm32687	2
A0A0J9YUJ3;D3YY96;D3Z2L1;D3Z7I0;Q3UU56;Q8BL74	ENSMUSG00000106864;ENSMUSG00000101678	Gtf3c2;Gm29609	2
A0A0J9YUJ3;D3Z2L1;D3Z7I0;Q3UU56;Q8BL74	ENSMUSG00000106864;ENSMUSG00000101678	Gtf3c2;Gm29609	2
A0A0J9YUW3;E9Q459;F6R4Z5;F7A0E9;Q07230;Q8VC29	ENSMUSG00000091183;ENSMUSG00000067942;ENSMUSG00000056019;ENSMUSG00000038797	Gm5141;Zfp160;Zfp709;Zscan2	4
A0A0J9YV90;Q8BHJ5;Q9QXE7	ENSMUSG00000027630;ENSMUSG00000025246	Tbl1xr1;Tbl1x	2
A0A0J9YVF0;Q14BI2;Q9QYS2	ENSMUSG00000023192;ENSMUSG00000003974	Grm2;Grm3	2
A0A0N4SUJ7;A0A0N4SUM8;A0A0N4SV52;A0A0N4SV90;Q69ZQ2	ENSMUSG00000030056;ENSMUSG00000107928	Isy1;Gm45140	2
A0A0N4SUJ7;A0A0N4SUM8;A0A0N4SV90;Q69ZQ2	ENSMUSG00000030056;ENSMUSG00000107928	Isy1;Gm45140	2
A0A0N4SUJ7;A0A0N4SUM8;Q69ZQ2	ENSMUSG00000030056;ENSMUSG00000107928	Isy1;Gm45140	2
A0A0N4SUM8;Q69ZQ2	ENSMUSG00000107928;ENSMUSG00000030056	Gm45140;Isy1	2
A0A0N4SUN5;A0A0N4SVA0;E9QAD1;Q9JHR9;Q9JHR9-2	ENSMUSG00000001520;ENSMUSG00000108011	Nrip2;Gm44596	2
A0A0N4SUX5;P17182;P17183;Q6PHC1	ENSMUSG00000004267;ENSMUSG00000063524;ENSMUSG00000059040	Eno2;Eno1;Eno1b	3
A0A0N4SV66;C0HKE1;C0HKE2;C0HKE3;C0HKE4;C0HKE5;C0HKE6;C0HKE7;C0HKE8;C0HKE9;Q64523;Q6GSS7;Q8BFU2;Q8CGP4;Q8CGP5;Q8CGP6;Q8CGP7;Q8R1M2	ENSMUSG00000060032;ENSMUSG00000071478;ENSMUSG00000069301;ENSMUSG00000061615;ENSMUSG00000094777;ENSMUSG00000069309;ENSMUSG00000071516;ENSMUSG00000094248;ENSMUSG00000069270;ENSMUSG00000069272;ENSMUSG00000068855;ENSMUSG00000063954;ENSMUSG00000064220;ENSMUSG00000078851;ENSMUSG00000060081;ENSMUSG00000061991;ENSMUSG00000069302;ENSMUSG00000063021	H2aj;H2ac7;H2ac11;H2ac4;H2ac24;H2ac22;H2ac13;H2ac23;H2ac6;H2ac8;H2ac20;H2ac19;H2ac18;H2aw;H2ac1;H2ac10;H2ac12;H2ac15	18
A0A0N4SV66;C0HKE1;C0HKE2;C0HKE3;C0HKE4;C0HKE5;C0HKE6;C0HKE7;C0HKE8;C0HKE9;Q8BFU2;Q8CGP4;Q8CGP5;Q8CGP6;Q8CGP7;Q8R1M2	ENSMUSG00000060032;ENSMUSG00000071478;ENSMUSG00000069301;ENSMUSG00000061615;ENSMUSG00000094777;ENSMUSG00000069309;ENSMUSG00000071516;ENSMUSG00000094248;ENSMUSG00000069270;ENSMUSG00000069272;ENSMUSG00000078851;ENSMUSG00000060081;ENSMUSG00000061991;ENSMUSG00000069302;ENSMUSG00000063021	H2aj;H2ac7;H2ac11;H2ac4;H2ac24;H2ac22;H2ac13;H2ac23;H2ac6;H2ac8;H2aw;H2ac1;H2ac10;H2ac12;H2ac15	15
A0A0N4SV66;C0HKE1;C0HKE2;C0HKE3;C0HKE4;C0HKE5;C0HKE6;C0HKE7;C0HKE8;C0HKE9;Q8BFU2;Q8CGP5;Q8CGP6;Q8CGP7;Q8R1M2	ENSMUSG00000060032;ENSMUSG00000071478;ENSMUSG00000069301;ENSMUSG00000061615;ENSMUSG00000094777;ENSMUSG00000069309;ENSMUSG00000071516;ENSMUSG00000094248;ENSMUSG00000069270;ENSMUSG00000069272;ENSMUSG00000078851;ENSMUSG00000061991;ENSMUSG00000069302;ENSMUSG00000063021	H2aj;H2ac7;H2ac11;H2ac4;H2ac24;H2ac22;H2ac13;H2ac23;H2ac6;H2ac8;H2aw;H2ac10;H2ac12;H2ac15	14
A0A0N4SV79;A0A5H1ZRM6;A2AEW0;A2AEW1;D3Z6Q7;E9PZ28;F6W7D6;Q08874;Q08874-2;Q08874-4;Q08874-5;Q08874-7;Q08874-8;Q08874-9;Q3UKG7;Q64092;Q64092-2;Q64092-3;Q64092-4;Q9R210;Q9WTW4	ENSMUSG00000035158;ENSMUSG00000000134;ENSMUSG00000023990;ENSMUSG00000029553	Mitf;Tfe3;Tfeb;Tfec	4
A0A0N4SVA0;E9QAD1;Q9JHR9;Q9JHR9-2	ENSMUSG00000108011;ENSMUSG00000001520	Gm44596;Nrip2	2
A0A0N4SVB8;F6QKK2;Q8VEH3;Q9CQW2	ENSMUSG00000030105;ENSMUSG00000026426	Arl8b;Arl8a	2
A0A0N4SVE0;A0A0N4SWE9;A0A0U1RNK9;A0A0U1RNP5;A0A0U1RNR3;Q9DCW4	ENSMUSG00000107482;ENSMUSG00000004610	Etfbl;Etfb	2
A0A0N4SVE0;A0A0N4SWE9;A0A0U1RNP5;A0A0U1RNR3;A0A0U1RQB4;Q9DCW4	ENSMUSG00000107482;ENSMUSG00000004610	Etfbl;Etfb	2
A0A0N4SVE0;A0A0N4SWE9;A0A0U1RNP5;A0A0U1RNR3;Q9DCW4	ENSMUSG00000107482;ENSMUSG00000004610	Etfbl;Etfb	2
A0A0N4SVE0;A0A0U1RNK9;A0A0U1RNP5;A0A0U1RNR3;Q9DCW4	ENSMUSG00000107482;ENSMUSG00000004610	Etfbl;Etfb	2
A0A0N4SVE0;A0A0U1RNK9;A0A0U1RNP5;Q9DCW4	ENSMUSG00000107482;ENSMUSG00000004610	Etfbl;Etfb	2
A0A0N4SVE0;A0A0U1RNP5;A0A0U1RNR3;Q9DCW4	ENSMUSG00000107482;ENSMUSG00000004610	Etfbl;Etfb	2
A0A0N4SVE0;A0A0U1RNP5;A0A0U1RQB4;Q9DCW4	ENSMUSG00000107482;ENSMUSG00000004610	Etfbl;Etfb	2
A0A0N4SVM5;A0A0N4SVP8;A2AFK7;E9PV04;Q91VC3	ENSMUSG00000094973;ENSMUSG00000107906;ENSMUSG00000025580	Eif4a3l1;Eif4a3l2;Eif4a3	3
A0A0N4SVP8;A2AFK7;E9PV04;Q91VC3	ENSMUSG00000107906;ENSMUSG00000025580;ENSMUSG00000094973	Eif4a3l2;Eif4a3;Eif4a3l1	3
A0A0N4SVU1;P28665;P28666	ENSMUSG00000108022;ENSMUSG00000059908;ENSMUSG00000030131	Gm7298;Mug1;Mug2	3
A0A0N4SWA4;E9PYQ6;E9PYS1;E9Q7L6;H3BLD8;H3BLJ5;Q3TAY5;Q499D0;Q60987;Q61575;Q61660;Q8BUR3;Q8BUR3-2;Q8K3Q3;Q9ES18	ENSMUSG00000003154;ENSMUSG00000034998;ENSMUSG00000089922;ENSMUSG00000033713;ENSMUSG00000032998;ENSMUSG00000020950;ENSMUSG00000002057;ENSMUSG00000034227;ENSMUSG00000042002	Foxj2;Foxn2;Gm43517;Foxn3;Foxj3;Foxg1;Foxn1;Foxj1;Foxn4	9
A0A0N4SWB9;A0A5F8MQA9;F8WJ98;Q3T9T1;Q3TZY4;Q69ZZ6;Q69ZZ6-2;Q69ZZ6-3;Q80W04	ENSMUSG00000030126;ENSMUSG00000042066	Tmcc1;Tmcc2	2
A0A0N4SWG2;G3X8R7;Q3U133	ENSMUSG00000057691;ENSMUSG00000052763	Zfp746;Zfp212	2
A0A0R4J005;A0A5F8MPJ3;E9QP62;Q91XD2;Q99JW4;Q9D7B2	ENSMUSG00000019920;ENSMUSG00000024395	Lims1;Lims2	2
A0A0R4J008;O09106;P70288;Q8BQ10	ENSMUSG00000019777;ENSMUSG00000028800	Hdac2;Hdac1	2
A0A0R4J038;A0A338P699;D3YTY9;O08677;O08677-2;O08677-3;Q6S9I0;Q6S9I2;Q6S9I3	ENSMUSG00000022875;ENSMUSG00000060459	Kng1;Kng2	2
A0A0R4J063;A0A338P764;O89096;P61329;P61329-2;P70379;P70379-2	ENSMUSG00000025551;ENSMUSG00000022523	Fgf14;Fgf12	2
A0A0R4J090;E9Q395;E9QLX1;P11609;P11610	ENSMUSG00000028076;ENSMUSG00000041750	Cd1d1;Cd1d2	2
A0A0R4J090;E9QLX1;P11609;P11610	ENSMUSG00000028076;ENSMUSG00000041750	Cd1d1;Cd1d2	2
A0A0R4J0C2;D3Z4E0;O09046;O09046-2	ENSMUSG00000074141	Il4i1;Il4i1b	2
A0A0R4J0F9;A0A338P6F2;A0A5F8MQ99;G5E8A0;Q8CI95;S4R1M9;S4R296	ENSMUSG00000040875;ENSMUSG00000022807	Osbpl10;Osbpl11	2
A0A0R4J0F9;A0A338P6F2;G5E8A0;Q8CI95;S4R296	ENSMUSG00000040875;ENSMUSG00000022807	Osbpl10;Osbpl11	2
A0A0R4J119;Q5SQX6;Q7TMB8;Q7TMB8-2	ENSMUSG00000030447;ENSMUSG00000020340	Cyfip1;Cyfip2	2
A0A0R4J135;G3UYY2;P17563;Q63836	ENSMUSG00000068877;ENSMUSG00000068874	Selenbp2;Selenbp1	2
A0A0R4J135;P17563;Q63836	ENSMUSG00000068877;ENSMUSG00000068874	Selenbp2;Selenbp1	2
A0A0R4J157;E0CYR6;Q9JIY8	ENSMUSG00000051262;ENSMUSG00000089694;ENSMUSG00000079495	Nat8f3;Nat8f7;Nat8f6	3
A0A0R4J170;E9QAB8;F2Z4A9;G3UX35;H3BJK2;H3BLH0;Q3TKT4;Q3TKT4-2;Q6DIC0	ENSMUSG00000032187;ENSMUSG00000024921	Smarca4;Smarca2	2
A0A0R4J198;Q9JJN4	ENSMUSG00000076438;ENSMUSG00000076436	Oxct2b;Oxct2a	2
A0A0R4J1B4;E9Q5K8;E9Q604;G5E8F1;P05555;P05555-2;Q3U1U4	ENSMUSG00000030786;ENSMUSG00000108596	Itgam;Gm49368	2
A0A0R4J1F3;A0A1B0GR65;A0A1B0GRH0;A0A1B0GS15;A0A1B0GSB5;A0A1B0GSE4;A0A1B0GSQ5;A0A1B0GT67;A0A668KL98;A0A668KM95;A2AWS5;B7ZDF4;B7ZDF5;B7ZDF7;Q3UJF1;Q99N13;Q99N13-2;Q99N13-3;Q9Z2V6	ENSMUSG00000004698;ENSMUSG00000008855	Hdac9;Hdac5	2
A0A0R4J1M1;D3YTW9;P22725;P22725-2;P22726	ENSMUSG00000030170;ENSMUSG00000021994	Wnt5b;Wnt5a	2
A0A0R4J1M6;A0A338P7A8;E9Q548;E9QNU3;P98154;Q6P5A9;Q8C2R4	ENSMUSG00000003166;ENSMUSG00000092470	Dgcr2;Gm20518	2
A0A0R4J1P2;D3Z2H9;D3Z6I8;E9Q5J9;E9Q7Q3;P21107;P21107-2	ENSMUSG00000027940;ENSMUSG00000058126	Tpm3;Tpm3-rs7	2
A0A0R4J1R8;P37242;P37242-2;P63058;P63058-2;P63058-3;P63058-4	ENSMUSG00000058756;ENSMUSG00000021779	Thra;Thrb	2
A0A0R4J244;A1L349;E9PWC8;E9PZR3;E9QAN2;E9QAY4;F6VTN8;Q61183;Q61183-2;Q61183-3;Q61183-4;Q9WVP6	ENSMUSG00000021111;ENSMUSG00000074817	Papola;Papolb	2
A0A0R4J245;A0A286YD17;A0A286YDU1;P12400	ENSMUSG00000074874;ENSMUSG00000114432;ENSMUSG00000114635	Ctla2b;Gm49391;Gm49392	3
A0A0R4J284;A0A338P6U6;P11985;P11985-2	ENSMUSG00000079710;ENSMUSG00000079707;ENSMUSG00000116780	Dynlt2a2;Dynlt2a1;Dynlt2a3	3
A0A0R4J291;F2Z402;Q7TMV3	ENSMUSG00000079043;ENSMUSG00000027300	Fastkd5;Ubox5	2
A0A0U1RNK4;E9Q7W1;E9Q9T3;F8VQ90;Q7TS48;Q8VGQ6	ENSMUSG00000090629;ENSMUSG00000063137;ENSMUSG00000044029;ENSMUSG00000062608	Olfr180;Olfr177;Olfr178;Olfr195	4
A0A0U1RNP2;E9PYH6	ENSMUSG00000108815;ENSMUSG00000042308	Gm49388;Setd1a	2
A0A0U1RNW0;A0A0U1RP94;A0A0U1RPD7;A0A0U1RPM8;A0A494BAP2;Q6P2B2;Q8BTH8;Q8BVP5;Q8C4X2;Q99K78	ENSMUSG00000032384;ENSMUSG00000073563;ENSMUSG00000003345	Csnk1g1;Csnk1g3;Csnk1g2	3
A0A0U1RNZ6;G5E883;P57784	ENSMUSG00000108793;ENSMUSG00000030512	Gm45213;Snrpa1	2
A0A0U1RP27;A0A0U1RQ48;A0A140T8K4;E9Q8F6;Q8VGQ7	ENSMUSG00000090629;ENSMUSG00000090951;ENSMUSG00000060663;ENSMUSG00000071510	Olfr180;Olfr181;Olfr175;Olfr172	4
A0A0U1RPB0;D3Z3Y4;D3Z4H6;D6RGU1;G5E8L2;P52912;P70318;Q80ZW7;Q8CII5;Q921W2	ENSMUSG00000030846;ENSMUSG00000071337	Tial1;Tia1	2
A0A0U1RPB0;D3Z3Y4;D6RGU1;G5E8L2;P70318;Q80ZW7;Q8CII5;Q921W2	ENSMUSG00000030846;ENSMUSG00000071337	Tial1;Tia1	2
A0A0U1RPE4;A0A140LJE7;P26048;P62812	ENSMUSG00000010803;ENSMUSG00000000560	Gabra1;Gabra2	2
A0A0U1RPF4;Q5M9M1;Q80T19;Q9EQ21	ENSMUSG00000056978;ENSMUSG00000050440	Hamp2;Hamp	2
A0A0U1RPL2;A0A0U1RQB6;B2RWS6;F8VPR5;P45481	ENSMUSG00000022521;ENSMUSG00000055024	Crebbp;Ep300	2
A0A0U1RPL9;P33267;Q3UT49;Q64458	ENSMUSG00000052974;ENSMUSG00000003053	Cyp2f2;Cyp2c29	2
A0A0U1RPM9;B2RXC6;O35134	ENSMUSG00000049553;ENSMUSG00000025280	Polr1a;Polr3a	2
A0A0U1RPN8;A0A0U1RPT5;A6ZI44;A6ZI46;D3YV98;D3YWI1;D3Z510;P05064;Q9CPQ9	ENSMUSG00000030695;ENSMUSG00000059343	Aldoa;Aldoart1	2
A0A0U1RPN8;A0A0U1RPT5;A6ZI44;A6ZI46;D3YV98;D3YWI1;P05064;Q9CPQ9	ENSMUSG00000030695;ENSMUSG00000059343	Aldoa;Aldoart1	2
A0A0U1RPN8;A0A0U1RPT5;A6ZI44;A6ZI46;D3YWI1;D3Z510;P05064;Q9CPQ9	ENSMUSG00000030695;ENSMUSG00000059343	Aldoa;Aldoart1	2
A0A0U1RPN8;A6ZI44;A6ZI46;D3YWI1;D3Z510;P05064;Q9CPQ9	ENSMUSG00000030695;ENSMUSG00000059343	Aldoa;Aldoart1	2
A0A0U1RPN8;A6ZI44;A6ZI46;D3YWI1;P05064;Q9CPQ9	ENSMUSG00000030695;ENSMUSG00000059343	Aldoa;Aldoart1	2
A0A0U1RPN8;A6ZI46;D3YWI1;D3Z510;P05064	ENSMUSG00000030695;ENSMUSG00000059343	Aldoa;Aldoart1	2
A0A0U1RPN8;A6ZI46;D3YWI1;D3Z510;P05064;Q9CPQ9	ENSMUSG00000030695;ENSMUSG00000059343	Aldoa;Aldoart1	2
A0A140LHL9;A2AGR4;Q60644;Q8BP65;Q9Z0Y9	ENSMUSG00000060601;ENSMUSG00000002108	Nr1h2;Nr1h3	2
A0A140LHR2;Q8BVP5;Q99K78	ENSMUSG00000032384;ENSMUSG00000003345	Csnk1g1;Csnk1g2	2
A0A140LI52;A0A140LJ05;C6KI89;E9Q355;E9Q355-2	ENSMUSG00000049123;ENSMUSG00000049676	Catsperg2;Catsperg1	2
A0A140LIB4;E0CY33;E0CYK7;E9PWI9;Q8BZL8;Q924W9	ENSMUSG00000036111;ENSMUSG00000030226	Lmo1;Lmo3	2
A0A140LJ36;Q9JIG8	ENSMUSG00000109493;ENSMUSG00000031149	Gm45208;Praf2	2
A0A140LJJ1;Q9D0B1	ENSMUSG00000109129;ENSMUSG00000051184	Gm44973;Zfp524	2
A0A140T8L6;A0A1B0GRU6;A0A1W2P6Q9;E9Q0Y1;G5E8M3;H3BIU1;P60007;P60007-2	ENSMUSG00000074780;ENSMUSG00000030649	Anapc15-ps;Anapc15	2
A0A140T8M2;A0A140T8P6;P01635	ENSMUSG00000096422;ENSMUSG00000076564;ENSMUSG00000095007	Igkv12-44;Igkv12-46;Igkv12-41	3
A0A140T8M2;P01635	ENSMUSG00000096422;ENSMUSG00000095007	Igkv12-44;Igkv12-41	2
A0A140T8N5;A0A140T8N7	ENSMUSG00000095630;ENSMUSG00000094930	Igkv6-23;Igkv6-25	2
A0A140T8N7;A0A140T8Q3	ENSMUSG00000094930;ENSMUSG00000095794	Igkv6-25;Igkv6-17	2
A0A140T8N7;A0A140T8Q3;P01633	ENSMUSG00000094930;ENSMUSG00000095794	Igkv6-25;Igkv6-17	2
A0A140T8P6;P01635	ENSMUSG00000076564;ENSMUSG00000095007	Igkv12-46;Igkv12-41	2
A0A140T8Q0;A0A140T8Q4;P01664;P01665;P01666;P01668	ENSMUSG00000094478;ENSMUSG00000096715	Igkv3-3;Igkv3-4	2
A0A1B0GQV3;A0A1B0GR52;A0A1B0GR53;A0A1B0GS34;A0A1B0GSF3;A0A1B0GT05;O35153	ENSMUSG00000025484;ENSMUSG00000110136	Bet1l;Gm45785	2
A0A1B0GQV3;A0A1B0GT05;O35153	ENSMUSG00000025484;ENSMUSG00000110136	Bet1l;Gm45785	2
A0A1B0GQV5;P05366;P05367	ENSMUSG00000057465;ENSMUSG00000074115	Saa2;Saa1	2
A0A1B0GQW0;A0A1B0GT97;Q99JH8;Q9CQM2	ENSMUSG00000002778;ENSMUSG00000079111	Kdelr1;Kdelr2	2
A0A1B0GQW6;A0A1B0GS68;A0A1B0GSB2;A0A1B0GSF0;A0A1B0GSQ6;A0A1B0GT00;A0A1B0GTA1;P19253	ENSMUSG00000074129;ENSMUSG00000089989	Rpl13a;Gm45713	2
A0A1B0GQW6;A0A1B0GS68;A0A1B0GSB2;A0A1B0GSF0;A0A1B0GSQ6;A0A1B0GTA1;P19253	ENSMUSG00000074129;ENSMUSG00000089989	Rpl13a;Gm45713	2
A0A1B0GQX5;A0A1B0GRE9;A0A1B0GSL7;A0A1B0GSR2;A0A1B0GSR9;A0A1B0GSX0;A0A1B0GT41;D3YVR7;D3YZE4;D3YZQ9;P00342;P06151	ENSMUSG00000063229;ENSMUSG00000030851	Ldha;Ldhc	2
A0A1B0GR51;D3Z0A0;D3Z7W3;E9PUJ5;F6UDR6;Q8CBG9;Q8CBG9-2;Q8CBG9-3;Q8CBG9-4;Q8CBG9-5	ENSMUSG00000013878;ENSMUSG00000109850	Rnf170;Gm45692	2
A0A1B0GR52;A0A1B0GR53;A0A1B0GS34;A0A1B0GSF3;A0A1B0GT05;O35153	ENSMUSG00000025484;ENSMUSG00000110136	Bet1l;Gm45785	2
A0A1B0GR76;A2AJK6;A2AJK6-3;Q8BYH8;Q8BYH8-2	ENSMUSG00000056608;ENSMUSG00000041235	Chd9;Chd7	2
A0A1B0GRB2;A0A1B0GRB8;A0A1B0GRM7;A0A1B0GRX7;A2A517;G5E8Q4;O08967;P63034;P63034-2;P63034-3;Q3TZ02;Q99KH2;Q9QX11;Q9QX11-2	ENSMUSG00000003269;ENSMUSG00000017132;ENSMUSG00000018001	Cyth2;Cyth1;Cyth3	3
A0A1B0GRH1;A0A1B0GS68;A0A1B0GSB2;A0A1B0GSC2;A0A1B0GSQ6;A0A1B0GT00;A0A1B0GTA1;P19253	ENSMUSG00000074129;ENSMUSG00000089989	Rpl13a;Gm45713	2
A0A1B0GRM9;A0A1B0GRS0;A0A1B0GT95;A0A338P6Q9;B1AS34;B1AS37;Q3U4B1;Q9CYZ8;Q9CYZ8-2;Q9D032;Q9D032-2	ENSMUSG00000070003;ENSMUSG00000003992;ENSMUSG00000061887	Ssbp4;Ssbp2;Ssbp3	3
A0A1B0GRZ4;A0A1B0GS07;A0A1B0GSN2;A0A1B0GT36;E9PVS2;E9PZ73;E9Q387;E9QAK6;F6QH05;F6QIG2;F6TBI7;F6TTJ9;F6ZIM6;F7B3M8;F8VPU0;P30051;P48301;P70210;Q3UFP5;Q3USK5;Q6PAQ8	ENSMUSG00000030796;ENSMUSG00000055320;ENSMUSG00000002249	Tead2;Tead1;Tead3	3
A0A1B0GRZ4;A0A1B0GS07;A0A1B0GT36;E9PZ73;E9Q387;E9QAK6;F6QH05;F6QIG2;F6TBI7;F6TTJ9;F6ZIM6;F7B3M8;F8VPU0;P30051;P48301;P70210;Q3UFP5;Q3USK5;Q6PAQ8	ENSMUSG00000030796;ENSMUSG00000055320;ENSMUSG00000002249	Tead2;Tead1;Tead3	3
A0A1B0GS13;A0A1B0GSH8;A0A1B0GT81;A0A1B0GTA4;Q07813	ENSMUSG00000003873;ENSMUSG00000109926	Bax;Gm45808	2
A0A1B0GS68;A0A1B0GSB2;A0A1B0GSC2;A0A1B0GSQ6;A0A1B0GT00;A0A1B0GTA1;P19253	ENSMUSG00000089989;ENSMUSG00000074129	Gm45713;Rpl13a	2
A0A1B0GS68;A0A1B0GSB2;A0A1B0GSC2;A0A1B0GSQ6;A0A1B0GTA1;P19253	ENSMUSG00000089989;ENSMUSG00000074129	Gm45713;Rpl13a	2
A0A1B0GS68;A0A1B0GSB2;A0A1B0GSF0;A0A1B0GSQ6;A0A1B0GTA1;P19253	ENSMUSG00000089989;ENSMUSG00000074129	Gm45713;Rpl13a	2
A0A1B0GS68;A0A1B0GSB2;A0A1B0GSQ6;A0A1B0GTA1;P19253	ENSMUSG00000089989;ENSMUSG00000074129	Gm45713;Rpl13a	2
A0A1B0GSI4;A0A1W2P6S5;A0A1W2P868;A0A2I3BPT2;A0A2I3BQM2;A0A2I3BRJ1;B1AS29;E9Q2Y1;F6QF13;F6Z3M4;P39087;P39087-2;Q60934	ENSMUSG00000022935;ENSMUSG00000056073;ENSMUSG00000001985	Grik1;Grik2;Grik3	3
A0A1B0GT12;B4YDY0;P58390;P58391	ENSMUSG00000054477;ENSMUSG00000000794	Kcnn2;Kcnn3	2
A0A1B0GT66;F6Y6L6;F8WIR1;P18242	ENSMUSG00000110040;ENSMUSG00000007891	Gm49369;Ctsd	2
A0A1B0GT68;Q99J93	ENSMUSG00000110104;ENSMUSG00000060591	Gm45717;Ifitm2	2
A0A1B0GT68;Q99J93;Q9CQW9	ENSMUSG00000110104;ENSMUSG00000060591;ENSMUSG00000025492	Gm45717;Ifitm2;Ifitm3	3
A0A1B0GXC3;I7HLV2;P86048;Q6ZWV3	ENSMUSG00000008682;ENSMUSG00000060499	Rpl10;Rpl10l	2
A0A1D5RL96;F7CG54;Q3TEG0;Q80TK0	ENSMUSG00000111375;ENSMUSG00000106631	Btbd8;Gm42669	2
A0A1D5RL96;F7CG54;Q80TK0	ENSMUSG00000111375;ENSMUSG00000106631	Btbd8;Gm42669	2
A0A1D5RLK7;E9PXI8;E9QNK5;P35347;Q3UQP0;Q60748;Q60748-2	ENSMUSG00000003476;ENSMUSG00000018634	Crhr2;Crhr1	2
A0A1D5RLT6;A0A1L1SQ42;D3YWR0;F7BFL8;F8WJ74;Q80TI0;Q80TI0-2;Q80TI0-3;Q80TI0-4;Q8VEF1;Q8VEF1-2;Q8VEF1-3	ENSMUSG00000040111;ENSMUSG00000001248	Gramd1b;Gramd1a	2
A0A1D5RM20;A0A494B9T3;D3YZY0;D3Z2K3;P62737;P63268;P68033	ENSMUSG00000031972;ENSMUSG00000035783;ENSMUSG00000059430;ENSMUSG00000068614	Acta1;Acta2;Actg2;Actc1	4
A0A1D5RM20;A0A494B9T3;D3YZY0;D3Z2K3;P62737;P63268;P68033;P68134	ENSMUSG00000031972;ENSMUSG00000035783;ENSMUSG00000059430;ENSMUSG00000068614	Acta1;Acta2;Actg2;Actc1	4
A0A1D5RM20;P68033	ENSMUSG00000031972;ENSMUSG00000068614	Acta1;Actc1	2
A0A1D5RM20;P68033;P68134	ENSMUSG00000031972;ENSMUSG00000068614	Acta1;Actc1	2
A0A1L1M1J8;Q3UHC9;Q60603;Q920E3	ENSMUSG00000058248;ENSMUSG00000034402	Kcnh1;Kcnh5	2
A0A1L1SQ68;E9PVG0;Q8BUH7	ENSMUSG00000053128;ENSMUSG00000072476	Rnf26;Gm9008	2
A0A1L1SQM2;A6PWD6;Q5NCB3;Q61635	ENSMUSG00000078920;ENSMUSG00000058163	Ifi47;Gm5431	2
A0A1L1SRS6;D3YV69;P35279;P35279-2;P61294;Q8BHD0	ENSMUSG00000032549;ENSMUSG00000030704;ENSMUSG00000055069	Rab6b;Rab6a;Rab39	3
A0A1L1SRX5;P17742;V9GX31;V9GXC1	ENSMUSG00000071866;ENSMUSG00000083780	Ppia;Gm12728	2
A0A1L1SS27;A0A1L1SUN1;P47915;W4VSN7	ENSMUSG00000048758;ENSMUSG00000078240	Rpl29;Gm3550	2
A0A1L1SS27;P47915;W4VSN7	ENSMUSG00000048758;ENSMUSG00000078240	Rpl29;Gm3550	2
A0A1L1SSA3;J3QN87;J3QPZ8;P48024;Q9CXU9	ENSMUSG00000006941;ENSMUSG00000035530	Eif1b;Eif1	2
A0A1L1SSA3;J3QN87;P48024;Q9CXU9	ENSMUSG00000006941;ENSMUSG00000035530	Eif1b;Eif1	2
A0A1L1ST33;B1AUG0;Q64143	ENSMUSG00000111410;ENSMUSG00000028698	Gm49337;Pik3r3	2
A0A1L1STM6;E9PZ11;F2Z3V9;Q5DU09	ENSMUSG00000013419;ENSMUSG00000075595	Zfp651;Zfp652	2
A0A1L1SUS7;Q04735;Q04735-2;Q04899;Q8K0D0;Q8K0D0-2	ENSMUSG00000020015;ENSMUSG00000031065;ENSMUSG00000026437	Cdk17;Cdk16;Cdk18	3
A0A1L1SV24;Q9CPW2	ENSMUSG00000111692;ENSMUSG00000079677	Gm49373;Fdx2	2
A0A1L1SV24;Q9CPW2;Q9CPW2-2	ENSMUSG00000111692;ENSMUSG00000079677	Gm49373;Fdx2	2
A0A1L1SV28;A0A5F8MPF5;D3Z6H8;P0DMN7	ENSMUSG00000075232;ENSMUSG00000063953	Amd1;Amd2	2
A0A1W2P6N3;A0A1W2P720;A0A1W2P869;P36536;Q99JZ4;Q9CQC9	ENSMUSG00000020088;ENSMUSG00000020386	Sar1a;Sar1b	2
A0A1W2P768;E0CZ27;F8WI35;P02301;P68433;P84228;P84244	ENSMUSG00000069273;ENSMUSG00000100210;ENSMUSG00000081058;ENSMUSG00000099583;ENSMUSG00000093769;ENSMUSG00000074403;ENSMUSG00000069310;ENSMUSG00000069267;ENSMUSG00000060743;ENSMUSG00000016559;ENSMUSG00000101972;ENSMUSG00000069265;ENSMUSG00000101355;ENSMUSG00000099517	H3c6;H3c7;H3c15;H3c4;H3c14;H3c13;H3c3;H3c2;H3f3a;H3f3b;H3c11;H3c1;H3c10;H3c8	14
A0A1W2P768;P68433;P84228	ENSMUSG00000069273;ENSMUSG00000100210;ENSMUSG00000081058;ENSMUSG00000099583;ENSMUSG00000093769;ENSMUSG00000074403;ENSMUSG00000069310;ENSMUSG00000069267;ENSMUSG00000101972;ENSMUSG00000069265;ENSMUSG00000101355;ENSMUSG00000099517	H3c6;H3c7;H3c15;H3c4;H3c14;H3c13;H3c3;H3c2;H3c11;H3c1;H3c10;H3c8	12
A0A1W2P768;P84228	ENSMUSG00000069273;ENSMUSG00000100210;ENSMUSG00000081058;ENSMUSG00000099583;ENSMUSG00000093769;ENSMUSG00000074403;ENSMUSG00000069310;ENSMUSG00000069267	H3c6;H3c7;H3c15;H3c4;H3c14;H3c13;H3c3;H3c2	8
A0A1W2P799;Q3UHB1	ENSMUSG00000112743;ENSMUSG00000054027	Gm49358;Nt5dc3	2
A0A1W2P7F1;E0CZE7;E9Q6C2;Q8CFG8;Q8CG14	ENSMUSG00000079343;ENSMUSG00000038521	C1s2;C1s1	2
A0A1W2P7F1;E9Q6C2;Q8CFG8;Q8CG14	ENSMUSG00000079343;ENSMUSG00000038521	C1s2;C1s1	2
A0A1W2P7G1;Q5DTJ9;Q9ET54;Q9ET54-2;Q9ET54-3;Q9ET54-4;Q9ET54-5;Q9ET54-6	ENSMUSG00000020067;ENSMUSG00000058056	Mypn;Palld	2
A0A1Y7VJE9;A0A1Y7VK80;A0A494BB95;J3QNT6;J3QP87;Q3TQZ4;Q3UTA4;Q60872	ENSMUSG00000113805;ENSMUSG00000057561;ENSMUSG00000093847;ENSMUSG00000096619;ENSMUSG00000072905;ENSMUSG00000079034	Eif1ad13;Eif1ad12;Eif1a;Eif1ad15;Eif1ad14;Eif1ad3;Eif1ad8	7
A0A1Y7VJE9;A0A1Y7VK80;A0A494BB95;J3QNT6;J3QP87;Q3TQZ4;Q3UTA4;Q60872;Q8BMJ3;Q8BX20	ENSMUSG00000113805;ENSMUSG00000057561;ENSMUSG00000093847;ENSMUSG00000096619;ENSMUSG00000072905;ENSMUSG00000079034;ENSMUSG00000067194;ENSMUSG00000079029	Eif1ad13;Eif1ad12;Eif1a;Eif1ad15;Eif1ad14;Eif1ad3;Eif1ad8;Eif1ax;Eif1ad7	9
A0A1Y7VJE9;A0A1Y7VK80;A0A494BB95;J3QP87;Q3TQZ4;Q3UTA4;Q60872	ENSMUSG00000113805;ENSMUSG00000057561;ENSMUSG00000096619;ENSMUSG00000072905;ENSMUSG00000079034	Eif1ad13;Eif1ad12;Eif1a;Eif1ad14;Eif1ad3;Eif1ad8	6
A0A1Y7VJE9;A0A1Y7VK80;A0A494BB95;J3QP87;Q3TQZ4;Q3UTA4;Q60872;Q8BX20	ENSMUSG00000113805;ENSMUSG00000057561;ENSMUSG00000096619;ENSMUSG00000072905;ENSMUSG00000079034;ENSMUSG00000079029	Eif1ad13;Eif1ad12;Eif1a;Eif1ad14;Eif1ad3;Eif1ad8;Eif1ad7	7
A0A1Y7VJG6;A2A8N2;A6PWA4;E9Q5G7;M0QWA3;M0QWU7;Q5RJV9	ENSMUSG00000096576;ENSMUSG00000066031;ENSMUSG00000096276	Oog1;Pramel25;Gm2042	3
A0A1Y7VJH3;E9QJU8;Q62415;Q8CG79	ENSMUSG00000021285;ENSMUSG00000026510	Ppp1r13b;Trp53bp2	2
A0A1Y7VJI5;A0A1Y7VMB5;Q3UWE6;Q9D5R2	ENSMUSG00000035560;ENSMUSG00000037957	Wdr20rt;Wdr20	2
A0A1Y7VJI5;Q3UWE6;Q9D5R2	ENSMUSG00000035560;ENSMUSG00000037957	Wdr20rt;Wdr20	2
A0A1Y7VK55;A2ADI3;A2BG75;A2BG76;A2BG77;B1AUB6;B1AUB8;B1AUB9;B1AUC0;D3YZ00;E9PUH7;I7HIP8;P70255;P70255-2;P70255-3;P70255-4;P70255-5;P70255-6;P70255-7;P70257;P70257-1;P70257-2;P97863;P97863-2;P97863-3;Q02780;Q02780-2;Q02780-3;Q02780-4;Q02780-5;Q02780-6;Q02780-7;Q3TYK3	ENSMUSG00000055053;ENSMUSG00000008575;ENSMUSG00000028565;ENSMUSG00000001911	Nfic;Nfib;Nfia;Nfix	4
A0A1Y7VK66;A0A3Q4EHJ0;P0DP26;P0DP27;P0DP28	ENSMUSG00000063130;ENSMUSG00000019370;ENSMUSG00000036438;ENSMUSG00000001175	Calml3;Calm3;Calm2;Calm1	4
A0A1Y7VKT3;J3QQ10;Q9D011	ENSMUSG00000012429;ENSMUSG00000094649	Mplkip;Gm7102	2
A0A1Y7VKT9;E0CY38;E0CY91;E0CYW1;E0CZB3;Q9EPV8	ENSMUSG00000113951;ENSMUSG00000113489;ENSMUSG00000084786	Ubl5c;Ubl5b;Ubl5	3
A0A1Y7VKY1;F6YVP7;P62270;S4R1N6	ENSMUSG00000113061;ENSMUSG00000069117;ENSMUSG00000008668	Rps18-ps5;Rps18-ps6;Rps18	3
A0A1Y7VL93;P63321;Q9JIW9	ENSMUSG00000008859;ENSMUSG00000004451	Rala;Ralb	2
A0A1Y7VLN4;A0A5F8MPG1;A0A5F8MQ53;E9PWN0;E9QKQ5;Q91ZP3;Q91ZP3-2;Q99PI5;Q99PI5-2	ENSMUSG00000020593;ENSMUSG00000024052	Lpin1;Lpin2	2
A0A1Y7VMK3;A2A7R5;P62748	ENSMUSG00000071379;ENSMUSG00000028785	Hpcal1;Hpca	2
A0A1Y7VMZ4;Q6Q2Z6;Q9QYR7;Q9QYR7-2	ENSMUSG00000021228;ENSMUSG00000042540	Acot3;Acot5	2
A0A286YCH9;A0A286YCY5;B2RUK9;E9PY65;E9Q218;F2Z406;M0QWC3;P16372;Q7M6X9;Q7M6Y0	ENSMUSG00000078994;ENSMUSG00000078995;ENSMUSG00000071291;ENSMUSG00000098692;ENSMUSG00000051037	Zfp429;Zfp456;Zfp58;Gm28041;Zfp455	5
A0A286YCH9;M0QWC3;Q7M6X9;Q7M6Y0;Q7M6Y1;Q8BMT6	ENSMUSG00000078994;ENSMUSG00000051037;ENSMUSG00000058900	Zfp429;Zfp455;Rsl1	3
A0A286YCV0;A0A286YDR0;A2AQC3;D3YV00;O70228;P98195;P98195-2;Q8C288;Q8C4G3	ENSMUSG00000024566;ENSMUSG00000027546	Atp9b;Atp9a	2
A0A286YCX1;A0A286YDP5;P11416;P11416-2	ENSMUSG00000017491;ENSMUSG00000037992	Rarb;Rara	2
A0A286YDF0;P12399	ENSMUSG00000114432;ENSMUSG00000044258	Gm49391;Ctla2a	2
A0A286YDG0;D3YXI8;D3YXI9;D3Z235;D3Z236;L7N292;L7N2D0;Q5EBJ2;Q9DAR5	ENSMUSG00000095226;ENSMUSG00000093945;ENSMUSG00000079269;ENSMUSG00000091792;ENSMUSG00000090505;ENSMUSG00000095528;ENSMUSG00000095384	Gm10377;Gm3543;Gm3676;Gm3573;Gm3486;Gm10375;1700001F09Rik	7
A0A286YDM2;B8JJX8;Q4QQP3;Q80VN4	ENSMUSG00000114923;ENSMUSG00000048280;ENSMUSG00000021510;ENSMUSG00000058093	Gm49345;Zfp738;Zfp729a;Zfp729b	4
A0A286YDT6;Q5SRY7;Q5SRY7-2;Q5SRY7-3;Q5SRY7-4	ENSMUSG00000025217;ENSMUSG00000020271	Btrc;Fbxw11	2
A0A286YDZ6;H7BWY2;Q8R2R9;Q9JKC8	ENSMUSG00000021824;ENSMUSG00000031539	Ap3m1;Ap3m2	2
A0A286YE31;D3YW10;D3YXD1;H3BL23;H3BL69;P52482;P52483;Q91W82	ENSMUSG00000021774;ENSMUSG00000058317;ENSMUSG00000027011	Ube2e1;Ube2e2;Ube2e3	3
A0A286YE31;H3BL69;P52482	ENSMUSG00000021774;ENSMUSG00000058317	Ube2e1;Ube2e2	2
A0A2I3BPG9;P83882	ENSMUSG00000060377;ENSMUSG00000049751;ENSMUSG00000079435	Rpl36a-ps1;Rpl36al;Rpl36a	3
A0A2I3BQ39;P58321;Q9JKB1	ENSMUSG00000022111;ENSMUSG00000035337	Uchl3;Uchl4	2
A0A2I3BQ98;E9PYD7;G5E8C2	ENSMUSG00000075502;ENSMUSG00000043881	Kbtbd6;Kbtbd7	2
A0A2I3BQC0;A0A2I3BRL8;A2AFI3;A2AFI4;Q91VM5;Q9WV02;Q9WV02-2	ENSMUSG00000049235;ENSMUSG00000031134;ENSMUSG00000037070	Gm7324;Rbmx;Rbmxl1	3
A0A2I3BQE0;Q9JI10;Q9JI10-2;Q9JI11	ENSMUSG00000022329;ENSMUSG00000018209	Stk3;Stk4	2
A0A2I3BQH2;P23492;Q543K9	ENSMUSG00000021871;ENSMUSG00000115338	Gm49342;Pnp	2
A0A2I3BQH2;P23492;Q543K9;Q9D8C9	ENSMUSG00000021871;ENSMUSG00000115338;ENSMUSG00000068417	Gm49342;Pnp;Pnp2	3
A0A2I3BR11;D3Z5F7;P70345;P70345-2	ENSMUSG00000089682;ENSMUSG00000092232	Bcl2l2;Gm20521	2
A0A2I3BR20;A0A2I3BRA9;A0A2I3BRU6;A0A2K6EDK7;A0A2R8W6K5;A2A4W9;Q8BIF2;Q8BIF2-2;Q8BIF2-3;Q8BIF2-4;Q8BIF2-5;Q8BP71;Q8BP71-2;Q8BP71-3;Q8BP71-4;Q8BP71-5;Q8BP71-6;Q8BP71-7;Q8BP71-8;Q9JJ43-5;Q9JJ43-6;Q9JJ43-7	ENSMUSG00000033565;ENSMUSG00000008658;ENSMUSG00000025576	Rbfox2;Rbfox1;Rbfox3	3
A0A2I3BR20;A2A4W9;Q8BIF2;Q8BIF2-2;Q8BIF2-3;Q8BIF2-4;Q8BIF2-5;Q8BP71-4	ENSMUSG00000033565;ENSMUSG00000025576	Rbfox2;Rbfox3	2
A0A2I3BRA9;A0A2I3BRU6;A0A2K6EDK7;A0A2R8VI79;A0A2R8VK79;A0A2R8W6K5;Q8BP71;Q8BP71-2;Q8BP71-3;Q8BP71-5;Q8BP71-6;Q8BP71-7;Q8BP71-8;Q9JJ43;Q9JJ43-2;Q9JJ43-3;Q9JJ43-4;Q9JJ43-5;Q9JJ43-6	ENSMUSG00000033565;ENSMUSG00000008658	Rbfox2;Rbfox1	2
A0A2I3BRA9;A0A2I3BRU6;A0A2K6EDK7;A0A2R8VI79;A0A2R8VK79;A0A2R8W6K5;Q8BP71;Q8BP71-2;Q8BP71-3;Q8BP71-5;Q8BP71-6;Q8BP71-7;Q8BP71-8;Q9JJ43;Q9JJ43-2;Q9JJ43-4;Q9JJ43-5	ENSMUSG00000033565;ENSMUSG00000008658	Rbfox2;Rbfox1	2
A0A2I3BRA9;A0A2I3BRU6;A0A2K6EDK7;A0A2R8VI79;A0A2R8VK79;Q8BP71;Q8BP71-2;Q8BP71-3;Q8BP71-5;Q8BP71-6;Q8BP71-7;Q8BP71-8;Q9JJ43-2;Q9JJ43-3;Q9JJ43-6	ENSMUSG00000033565;ENSMUSG00000008658	Rbfox2;Rbfox1	2
A0A2I3BRA9;A0A2I3BRU6;A0A2K6EDK7;A0A2R8W6K5;Q8BP71;Q8BP71-2;Q8BP71-3;Q8BP71-5;Q8BP71-6;Q8BP71-7;Q9JJ43-5	ENSMUSG00000033565;ENSMUSG00000008658	Rbfox2;Rbfox1	2
A0A2I3BRL8;A2AFI3;A2AFI4;Q91VM5;Q9WV02;Q9WV02-2	ENSMUSG00000049235;ENSMUSG00000031134;ENSMUSG00000037070	Gm7324;Rbmx;Rbmxl1	3
A0A2I3BRL8;Q91VM5	ENSMUSG00000049235;ENSMUSG00000037070	Gm7324;Rbmxl1	2
A0A2R8VHA9;B1AQP7;Q3UZ24	ENSMUSG00000068252;ENSMUSG00000071716	Apol7b;Apol7e	2
A0A2R8VHF3;P05213	ENSMUSG00000116358;ENSMUSG00000023004	Gm49450;Tuba1b	2
A0A2R8VHF3;P68373;Q9JJZ2	ENSMUSG00000116358;ENSMUSG00000043091;ENSMUSG00000030137	Gm49450;Tuba1c;Tuba8	3
A0A2R8VHG2;A0A2R8VHI3;A0A2R8VHL8;A0A2R8VHN3;A0A2R8VHP9;A0A2R8VHY9;A0A2R8VHZ0;A0A2R8VI12;A0A2R8VI25;A0A2R8VI71;A0A2R8VI73;A0A2R8VJY1;A0A2R8VKF0;A0A2R8VKN0;A0A2R8W6L5;A0A2R8W6U6;B2M1R7;E9Q7D8;P57722;P57722-2;Q3TT81;Q61990;Q61990-2;Q61990-3	ENSMUSG00000056851;ENSMUSG00000001120	Pcbp2;Pcbp3	2
A0A2R8VHH0;A2AC13;P60764;P63001;Q05144;Q3TLP8	ENSMUSG00000033220;ENSMUSG00000018012;ENSMUSG00000001847	Rac2;Rac3;Rac1	3
A0A2R8VHH0;P63001;Q05144;Q3TLP8	ENSMUSG00000033220;ENSMUSG00000001847	Rac2;Rac1	2
A0A2R8VHN2;A0A2R8VI07;A0A2R8VK72;G3X9G9;H3BJI7;Q5I0W6;Q76I24;Q76I26;Q8C6B0;Q9D7S5	ENSMUSG00000054619;ENSMUSG00000058057;ENSMUSG00000093789;ENSMUSG00000056487	Mettl7a1;Mettl7a3;Methig1;Mettl7a2	4
A0A2R8VI07;A0A2R8VK72;H3BJI7;Q5I0W6;Q76I24;Q76I26;Q8C6B0;Q9D7S5	ENSMUSG00000054619;ENSMUSG00000093789;ENSMUSG00000058057;ENSMUSG00000056487	Mettl7a1;Methig1;Mettl7a3;Mettl7a2	4
A0A2R8VI07;A0A2R8VK72;Q5I0W6;Q76I24;Q8C6B0;Q9D7S5	ENSMUSG00000054619;ENSMUSG00000058057;ENSMUSG00000056487	Mettl7a1;Mettl7a3;Mettl7a2	3
A0A2R8VJW3;F6RRT7;O55229	ENSMUSG00000116461;ENSMUSG00000022617	Gm44502;Chkb	2
A0A2R8VJW3;O55229	ENSMUSG00000116461;ENSMUSG00000022617	Gm44502;Chkb	2
A0A2R8W6I1;A0A2R8W6N5;Q8C7I4;Q8VDU3	ENSMUSG00000068246;ENSMUSG00000057346	Apol9b;Apol9a	2
A0A2R8W6I7;A2A5V2;A2A5V3;P55194;S4R2D3	ENSMUSG00000116069;ENSMUSG00000022436	Gm49510;Sh3bp1	2
A0A2R8W6I7;A2A5V2;A2A5V3;S4R2D3	ENSMUSG00000116069;ENSMUSG00000022436	Gm49510;Sh3bp1	2
A0A2R8W6M1;Q6NXH3;Q6NXH3-2;Q6NXH3-3	ENSMUSG00000116016;ENSMUSG00000032745	Gm49496;Gpbp1	2
A0A338P6D0;A0A338P6E8;A0A338P6G6;A0A384DV79;P17095-1	ENSMUSG00000046711;ENSMUSG00000078249	Hmga1;Hmga1b	2
A0A338P6E8;A0A338P6F6;A0A338P6G6;A0A384DV79;P17095;P17095-1;Q3TE85	ENSMUSG00000046711;ENSMUSG00000078249	Hmga1;Hmga1b	2
A0A338P6E8;A0A338P6F6;P17095	ENSMUSG00000046711;ENSMUSG00000078249	Hmga1;Hmga1b	2
A0A338P6E8;A0A338P6F6;P17095;Q3TE85	ENSMUSG00000046711;ENSMUSG00000078249	Hmga1;Hmga1b	2
A0A338P6E8;A0A338P6G6;A0A384DV79;P17095-1	ENSMUSG00000046711;ENSMUSG00000078249	Hmga1;Hmga1b	2
A0A338P6F6;P17095;Q3TE85	ENSMUSG00000046711;ENSMUSG00000078249	Hmga1;Hmga1b	2
A0A338P6G6;A0A384DV79;P17095-1	ENSMUSG00000046711;ENSMUSG00000078249	Hmga1;Hmga1b	2
A0A338P6R8;A0A338P729;A0A338P769;B7ZNM7;Q9Z2Q6	ENSMUSG00000116594;ENSMUSG00000072214	Gm49601;Septin5	2
A0A338P6R8;A0A338P769	ENSMUSG00000116594;ENSMUSG00000072214	Gm49601;Septin5	2
A0A338P6R8;A0A338P769;B7ZNM7;Q9Z2Q6	ENSMUSG00000116594;ENSMUSG00000072214	Gm49601;Septin5	2
A0A338P6T6;A0A3B2W864;B2KF67	ENSMUSG00000024213;ENSMUSG00000117338	Nudt3;Gm49804	2
A0A338P711;A0A338P7E3;C0HKG5;C0HKG6	ENSMUSG00000095687;ENSMUSG00000094724	Rnaset2a;Rnaset2b	2
A0A338P734;A0A338P7J7;Q3UFY4;Q9DA80	ENSMUSG00000023806;ENSMUSG00000073471	Rsph3b;Rsph3a	2
A0A338P7B7;P51807	ENSMUSG00000096255;ENSMUSG00000095677;ENSMUSG00000000579;ENSMUSG00000092074	Dynlt1b;Dynlt1f;Dynlt1c;Dynlt1a	4
A0A338P7D7;B7ZMS4;Q9CWH6;Q9Z2U0	ENSMUSG00000027566;ENSMUSG00000036743	Psma7;Psma8	2
A0A338P7D7;Q9CWH6;Q9Z2U0	ENSMUSG00000027566;ENSMUSG00000036743	Psma7;Psma8	2
A0A338P7H3;P58064	ENSMUSG00000116930;ENSMUSG00000039680	Gm49711;Mrps6	2
A0A338P7K4;A0A3B2W864	ENSMUSG00000052146;ENSMUSG00000117338	Rps10;Gm49804	2
A0A338P7K4;A0A3B2W864;Q3UW83	ENSMUSG00000052146;ENSMUSG00000117338	Rps10;Gm49804	2
A0A384DV79	ENSMUSG00000046711;ENSMUSG00000078249	Hmga1;Hmga1b	2
A0A384DV91;D6REU3;P35175;Q497J0	ENSMUSG00000071562;ENSMUSG00000071561	Stfa1;Cstdc5	2
A0A384DV91;L7N257;P35175;Q497J0	ENSMUSG00000071562;ENSMUSG00000079594;ENSMUSG00000071561	Stfa1;Cstdc6;Cstdc5	3
A0A3B2W4B5;A0A3B2W817;A0A3B2WCA7;A0A3B2WCF2;A0A3B2WCV8;A0A3B2WD13;E9Q4X4;E9Q759;K7N621;K7N6Z8;L7N2A0	ENSMUSG00000091450;ENSMUSG00000091624;ENSMUSG00000091375;ENSMUSG00000067010;ENSMUSG00000091059	Vmn2r11;Vmn2r9;Vmn2r15;Vmn2r10;Vmn2r14	5
A0A3B2W837;Q8BH80;Q9QY76;Q9WV55	ENSMUSG00000024091;ENSMUSG00000054455	Vapa;Vapb	2
A0A3B2WAL8;G3XA25;Q80X81;Q8CAY6	ENSMUSG00000023832;ENSMUSG00000062480	Acat2;Acat3	2
A0A3B2WCF4;E9Q6M3;J3QM38	ENSMUSG00000078546;ENSMUSG00000096433	Zfp995;Zfp994	2
A0A3B2WD42;Q80SZ7	ENSMUSG00000117145;ENSMUSG00000068523	Gm4356;Gng5	2
A0A3Q4EBV9;A0A3Q4EH87;A0A3Q4EHZ1;E0CXC2;Q9DBC3	ENSMUSG00000024019;ENSMUSG00000098374	Cmtr1;Gm28043	2
A0A3Q4EHJ0	ENSMUSG00000019370;ENSMUSG00000036438;ENSMUSG00000001175	Calm3;Calm2;Calm1	3
A0A3Q4EHJ0;P0DP26;P0DP27;P0DP28	ENSMUSG00000019370;ENSMUSG00000036438;ENSMUSG00000001175	Calm3;Calm2;Calm1	3
A0A3Q4EHJ0;P0DP26;P0DP27;P0DP28;Q9D6P8	ENSMUSG00000019370;ENSMUSG00000036438;ENSMUSG00000001175;ENSMUSG00000063130	Calm3;Calm2;Calm1;Calml3	4
A0A494B908;A0A494BAS3;A0A494BAU3;A0A494BAW2;P19157	ENSMUSG00000060803;ENSMUSG00000038155	Gstp1;Gstp2	2
A0A494B908;A0A494BAS3;A0A494BAU3;A0A494BAW2;P19157;P46425	ENSMUSG00000060803;ENSMUSG00000038155	Gstp1;Gstp2	2
A0A494B908;A0A494BAW2;P19157;P46425	ENSMUSG00000060803;ENSMUSG00000038155	Gstp1;Gstp2	2
A0A494B945;A0A494BA38;A0A494BBL7;Q5SW86;Q9D1G1	ENSMUSG00000024870;ENSMUSG00000020149	Rab1b;Rab1a	2
A0A494B947;E9PUZ3;E9Q1I7;G3UW94;Q8BGJ9;Q9D883	ENSMUSG00000061613;ENSMUSG00000078765	U2af1;U2af1l4	2
A0A494B974;A0A494BBE1;Q9CWP8	ENSMUSG00000117873;ENSMUSG00000024854	Gm45928;Pold4	2
A0A494B9C0;A0A494B9W4;A0A494BAP6;A0A494BB78;F6TBN8;F7BGR7;Q5CZX8;Q8C7Q4;Q8C7Q4-2;Q8VE92;S4R1A6	ENSMUSG00000033760;ENSMUSG00000094936;ENSMUSG00000096370	Rbm4b;Rbm4;Gm21992	3
A0A494B9C0;A0A494BAP6;A0A494BB78;B0LM42;F6TBN8;F7BGR7;Q5CZX8;Q8C7Q4;Q8C7Q4-2;S4R1A6	ENSMUSG00000033760;ENSMUSG00000094936;ENSMUSG00000096370	Rbm4b;Rbm4;Gm21992	3
A0A494B9C0;A0A494BAP6;A0A494BB78;F6TBN8;Q5CZX8;Q8C7Q4;Q8C7Q4-2;S4R1A6	ENSMUSG00000033760;ENSMUSG00000094936	Rbm4b;Rbm4	2
A0A494B9T3;D3YZY0;D3Z2K3;P62737;P63268	ENSMUSG00000035783;ENSMUSG00000059430	Acta2;Actg2	2
A0A494B9T3;D3YZY0;P62737	ENSMUSG00000035783;ENSMUSG00000059430	Acta2;Actg2	2
A0A494B9T3;D3YZY0;P62737;P63268	ENSMUSG00000035783;ENSMUSG00000059430	Acta2;Actg2	2
A0A494B9T4;A0A494B9V4;A0A494BAD9;A0A494BAH9;M0QWU0;Q6NXI8;Q91WA4	ENSMUSG00000046668;ENSMUSG00000044365	Cxxc5;Cxxc4	2
A0A494B9W4;F6TBN8;F7BGR7;Q8C7Q4;Q8VE92	ENSMUSG00000033760;ENSMUSG00000094936;ENSMUSG00000096370	Rbm4b;Rbm4;Gm21992	3
A0A494B9X1;A0A494BAZ7	ENSMUSG00000117694;ENSMUSG00000037236	Snhg4;Matr3	2
A0A494B9X9;A0A494BA95;E9PUZ3;E9Q1I7;E9Q5J3;E9Q5Y2;E9Q809;F8WH71;Q8BGJ9;Q8BGJ9-2;Q8BGJ9-3;Q8BGJ9-4	ENSMUSG00000061613;ENSMUSG00000078765	U2af1;U2af1l4	2
A0A494BAN5;A0A494BAP2;Q8BVP5;Q8C4X2;Q99K78	ENSMUSG00000073563;ENSMUSG00000003345	Csnk1g3;Csnk1g2	2
A0A494BAP2;Q8BVP5;Q8C4X2;Q99K78	ENSMUSG00000073563;ENSMUSG00000003345	Csnk1g3;Csnk1g2	2
A0A494BAV5;P13011;P13516;Q6T707;Q99PL7	ENSMUSG00000025203;ENSMUSG00000037071;ENSMUSG00000050195;ENSMUSG00000025202	Scd2;Scd1;Scd4;Scd3	4
A0A494BAV5;P13011;Q99PL7	ENSMUSG00000025203;ENSMUSG00000025202	Scd2;Scd3	2
A0A494BB86;P61164;Q8R5C5	ENSMUSG00000025228;ENSMUSG00000037351	Actr1a;Actr1b	2
A0A494BB95;J3QNT6;Q60872;Q8BMJ3	ENSMUSG00000057561;ENSMUSG00000093847;ENSMUSG00000067194	Eif1a;Eif1ad15;Eif1ax	3
A0A494BB95;Q60872;Q8BMJ3	ENSMUSG00000057561;ENSMUSG00000067194	Eif1a;Eif1ax	2
A0A494BBC9;A0A494BBG1;Q501J2;Q91VW0	ENSMUSG00000118135;ENSMUSG00000057411	Gm50367;Antkmt	2
A0A494BBC9;Q501J2;Q91VW0	ENSMUSG00000118135;ENSMUSG00000057411	Gm50367;Antkmt	2
A0A494BBH0;F6WYC8	ENSMUSG00000086812;ENSMUSG00000079342	Gm8978;Lipo1	2
A0A571BET8;Q3UFC0;Q3YAA5;Q3YAB5;Q6PHZ8;Q6PHZ8-2;Q6PHZ8-3;Q6PHZ8-4;Q9JJ57;Q9JJ57-2;Q9JJ57-3;Q9JJ57-4	ENSMUSG00000053519;ENSMUSG00000029088	Kcnip1;Kcnip4	2
A0A571BGF1;F6R9A8;L7N208;Q99LG7	ENSMUSG00000095909;ENSMUSG00000058748	Zfp997;Zfp958	2
A0A5F8MP75;A6P3E4;E9QN59;G3X8U9;Q3TQZ7;Q61831;Q61831-2;Q7TSJ7;Q80W80;Q8C9D4;Q91Y86	ENSMUSG00000046709;ENSMUSG00000021936	Mapk10;Mapk8	2
A0A5F8MP75;E9QN59;Q3TQZ7;Q61831;Q61831-2;Q8C9D4;Q9WTU6;Q9WTU6-2;Q9WTU6-3;Q9WTU6-4	ENSMUSG00000046709;ENSMUSG00000020366	Mapk10;Mapk9	2
A0A5F8MP91;A0A5F8MQ23;A2AJP2;E9Q9V9;P28700;P28705;Q6LC96	ENSMUSG00000015846;ENSMUSG00000015843	Rxra;Rxrg	2
A0A5F8MPA8;A0A5F8MPC6;Q65Z95;Q9ESC7	ENSMUSG00000018427;ENSMUSG00000022773	Ypel2;Ypel1	2
A0A5F8MPF5;D3Z6H8;P0DMN7	ENSMUSG00000075232;ENSMUSG00000063953	Amd1;Amd2	2
A0A5F8MPP7;A2AAY5;O89032;O89032-2;O89032-3	ENSMUSG00000040711;ENSMUSG00000053617	Sh3pxd2b;Sh3pxd2a	2
A0A5F8MPS9;A0A5K1VVQ7;D3Z654;P27782;P27782-2;Q00417;Q00417-2;Q8BGZ9;Q8C402	ENSMUSG00000000782;ENSMUSG00000027985	Tcf7;Lef1	2
A0A5F8MPY2;P99027	ENSMUSG00000118552;ENSMUSG00000025508	Rplp2-ps1;Rplp2	2
A0A5F8MQ23;E9Q9V9;P28700;P28704;P28704-2;P28705;Q3TWJ1;Q6LC96;Q8VCR0	ENSMUSG00000015846;ENSMUSG00000015843;ENSMUSG00000039656	Rxra;Rxrg;Rxrb	3
A0A5F8MQB6;G3X8Z1;Q3UW98;Q6Q473;Q6Q473-2	ENSMUSG00000068547;ENSMUSG00000074195	Clca4a;Clca4b	2
A0A5H1ZRM8;A2ASI5;A2ASI5-2;A2ASI5-3;B1AWN6	ENSMUSG00000075318;ENSMUSG00000057182	Scn2a;Scn3a	2
A0A668KLU7;E9QKA2;G3UY24;G5E8P8;O08580;Q61539	ENSMUSG00000024955;ENSMUSG00000021255	Esrra;Esrrb	2
A0A6I8MX18;H3BJ70;Q8CJF8;Q8CJF8-2;Q8CJF9;Q8CJG1	ENSMUSG00000041530;ENSMUSG00000042500;ENSMUSG00000028842	Ago1;Ago4;Ago3	3
A0A7N9VRC4;Q8R0W0	ENSMUSG00000118671	EPPK1;Eppk1	2
A0PK51;Q9D3H4	ENSMUSG00000062278;ENSMUSG00000060756;ENSMUSG00000057674;ENSMUSG00000058725	Gm11562;Krtap2-4;Gm11938;Gm11937	4
A2A4M2;Q64526;Q9D141;Q9D3H7	ENSMUSG00000069717;ENSMUSG00000070335;ENSMUSG00000059845;ENSMUSG00000090225	Gm11568;Krtap9-1;Gm11567;Gm11559	4
A2A4P3;A2A4P4;Q3THG9	ENSMUSG00000097239;ENSMUSG00000075528	Gm27029;Aarsd1	2
A2A4Q0;P61358	ENSMUSG00000063316	Rpl27;LOC108167922	2
A2A5F5;P35278;P61021;Q8C266	ENSMUSG00000019173;ENSMUSG00000000711	Rab5c;Rab5b	2
A2A5M9;D6RHQ9;Q9JI11	ENSMUSG00000018209;ENSMUSG00000022329	Stk4;Stk3	2
A2A5N1;D3YXN6;D6REF3;F6WA09;O70456;P68254;P68254-2;P68510;Q9CQV8;Q9CQV8-2	ENSMUSG00000018326;ENSMUSG00000022285;ENSMUSG00000020849;ENSMUSG00000047281;ENSMUSG00000076432;ENSMUSG00000018965	Ywhab;Ywhaz;Ywhae;Sfn;Ywhaq;Ywhah	6
A2A5R0;Q543M9;Q5U452;Q99PW4	ENSMUSG00000042854;ENSMUSG00000039725	Trp53rkb;Trp53rka	2
A2A5R0;Q5U452;Q99PW4	ENSMUSG00000042854;ENSMUSG00000039725	Trp53rkb;Trp53rka	2
A2A7R5;D3YVA2;E9PV73;P84075;Q91X97	ENSMUSG00000028785;ENSMUSG00000051359	Hpca;Ncald	2
A2A7W0;A2A7W1;L7N207;Q6SJQ5	ENSMUSG00000089722;ENSMUSG00000069609;ENSMUSG00000069607	Cd300ld5;Cd300ld4;Cd300ld3	3
A2A8L1;E9PYL1;E9PYU4;E9QAS4;E9QAS5;F6WR45;Q6PDQ2	ENSMUSG00000005045;ENSMUSG00000063870	Chd5;Chd4	2
A2A8L9;B0V2M7;B0V2M9;Q8BW72;Q8BW72-2;Q91VY5;Q91VY5-2	ENSMUSG00000033326;ENSMUSG00000024201	Kdm4a;Kdm4b	2
A2A8T1;A2A977;O88833	ENSMUSG00000063929;ENSMUSG00000066072	Cyp4a32;Cyp4a10	2
A2A9L3;F6VDY0;Q80ZW0;Q8QZR7	ENSMUSG00000050890;ENSMUSG00000037885	Pdik1l;Stk35	2
A2AAW9;Q9Z0N1;Q9Z0N2	ENSMUSG00000035150;ENSMUSG00000069049	Eif2s3x;Eif2s3y	2
A2ABZ2;Q922Q4;Q922W5	ENSMUSG00000025140;ENSMUSG00000026520	Pycr1;Pycr2	2
A2AC13;P60764;P63001;Q3TLP8	ENSMUSG00000018012;ENSMUSG00000001847	Rac3;Rac1	2
A2AD84;D3Z359;Q99JT2	ENSMUSG00000031112;ENSMUSG00000026277	Stk26;Stk25	2
A2AD84;D3Z359;Q99JT2;Q99KH8;Q9Z2W1	ENSMUSG00000031112;ENSMUSG00000026277;ENSMUSG00000063410	Stk26;Stk25;Stk24	3
A2AD84;Q99JT2;Q99KH8	ENSMUSG00000031112;ENSMUSG00000063410	Stk26;Stk24	2
A2ADW8;A2AJU2;A2BI02;A2BI72;B1AV09;B1AVZ5;B1AZM2;B1B0X0;B1B0X6;E9Q1L3;E9QA14;L7MU67;L7N236;L7N278;Q62012	ENSMUSG00000095872;ENSMUSG00000072923;ENSMUSG00000072931;ENSMUSG00000094941;ENSMUSG00000079387;ENSMUSG00000096834;ENSMUSG00000095082;ENSMUSG00000072930;ENSMUSG00000079395;ENSMUSG00000094378;ENSMUSG00000095621;ENSMUSG00000094885	Gm15128;Gm10439;Gm15080;Gm15093;Luzp4;Gm15127;Gm15091;Gm15107;Gm15114;Gm15097;Gm15085;Ott	12
A2AEC2;Q8CCT4	ENSMUSG00000044550;ENSMUSG00000054034	Tceal3;Tceal5	2
A2AEC2;Q8CCT4;Q8R0A5;Q9DB24	ENSMUSG00000044550;ENSMUSG00000054034;ENSMUSG00000031409	Tceal3;Tceal5;Tceal6	3
A2AEC2;Q8R0A5;Q9DB24	ENSMUSG00000044550;ENSMUSG00000031409	Tceal3;Tceal6	2
A2AEG3;A2AEG6;P35802;P35803;P35803-2;P35803-3;P35803-4;P35803-5;P35803-8	ENSMUSG00000031342;ENSMUSG00000031517	Gpm6b;Gpm6a	2
A2AEJ8;A2AEK1;Q8BIQ5;Q8BIQ5-2;Q8C7E9	ENSMUSG00000031256;ENSMUSG00000053536	Cstf2;Cstf2t	2
A2AEK1;Q8BIQ5;Q8BIQ5-2;Q8C7E9	ENSMUSG00000031256;ENSMUSG00000053536	Cstf2;Cstf2t	2
A2AEP0;A2BHD2	ENSMUSG00000067679;ENSMUSG00000079519	Obp1b;Gm14743	2
A2AF31;A2AF33;Q8C0W0	ENSMUSG00000089996;ENSMUSG00000089768;ENSMUSG00000072955	Tmsb15b2;Tmsb15b1;Tmsb15l	3
A2AF31;Q8C0W0	ENSMUSG00000089996;ENSMUSG00000072955	Tmsb15b2;Tmsb15l	2
A2AF33;Q8C0W0	ENSMUSG00000089768;ENSMUSG00000072955	Tmsb15b1;Tmsb15l	2
A2AFI9;A2AFJ1;Q60972;Q60973	ENSMUSG00000031353;ENSMUSG00000057236	Rbbp7;Rbbp4	2
A2AGH5;B0QZX1;P34902	ENSMUSG00000092463;ENSMUSG00000031304	Gm20489;Il2rg	2
A2AGJ9;F8WIJ0;Q3V0N8;Q6P6P5;Q924N4;Q924N4-2;Q9JIS8	ENSMUSG00000027130;ENSMUSG00000017765;ENSMUSG00000096764	Slc12a6;Slc12a4;Gm21985	3
A2AGJ9;Q3V0N8;Q6P6P5;Q924N4;Q924N4-2	ENSMUSG00000027130;ENSMUSG00000096764	Slc12a6;Gm21985	2
A2AGJ9;Q6P6P5	ENSMUSG00000027130;ENSMUSG00000096764	Slc12a6;Gm21985	2
A2AHZ2;P61092;Q06985	ENSMUSG00000040749;ENSMUSG00000036840	Siah1b;Siah1a	2
A2AIE6;A2BI45;A2BI46;A2BI49;A2BI50;Q9JJR2	ENSMUSG00000067764;ENSMUSG00000058328;ENSMUSG00000072479	Xlr5c;Xlr5a;Xlr5b	3
A2AK42;A2AK44;B1AYU4;B1AYU7;Q8C5N3;Q8C5N3-2	ENSMUSG00000095824;ENSMUSG00000096484;ENSMUSG00000079247;ENSMUSG00000094125;ENSMUSG00000094336;ENSMUSG00000096337;ENSMUSG00000096729;ENSMUSG00000027014	Gm13697;Gm13696;Gm13691;Gm13698;Gm13693;Gm13694;Gm13695;Cwc22	8
A2AKN8;A2AKN9;A2BIM8;A2BIN0;A2BIN1;A2CEK6;A2CEK7;A2CEL0;A2CEL1;A9C496;A9C497;A9R9W0;B5X0G2;B8JI96;E9PVW0;E9QA79;L7MUC7;L7N222;P02762;P04938;P11588;P11589;Q4FZE8;Q58EV3	ENSMUSG00000078687;ENSMUSG00000078688;ENSMUSG00000073834;ENSMUSG00000078674;ENSMUSG00000078686;ENSMUSG00000078675;ENSMUSG00000078673;ENSMUSG00000078680;ENSMUSG00000089873;ENSMUSG00000073830;ENSMUSG00000078683;ENSMUSG00000096674;ENSMUSG00000096688;ENSMUSG00000073842;ENSMUSG00000094793;ENSMUSG00000110439	Mup8;Mup2;Mup11;Mup18;Mup9;Mup16;Mup19;Mup10;Mup13;Mup14;Mup1;Mup15;Mup17;Mup7;Mup12;Mup22	16
A2AKN8;A2AKN9;A2BIM8;A2BIN0;A2CEK6;A2CEK7;A2CEL0;A2CEL1;A9C496;A9C497;A9R9W0;B5X0G2;B8JI96;E9PVW0;E9QA79;L7MUC7;L7N222;P02762;P04938;P11588;Q58EV3	ENSMUSG00000078687;ENSMUSG00000078688;ENSMUSG00000073834;ENSMUSG00000078674;ENSMUSG00000078686;ENSMUSG00000078675;ENSMUSG00000078673;ENSMUSG00000089873;ENSMUSG00000073830;ENSMUSG00000078683;ENSMUSG00000096674;ENSMUSG00000096688;ENSMUSG00000073842;ENSMUSG00000094793	Mup8;Mup2;Mup11;Mup18;Mup9;Mup16;Mup19;Mup13;Mup14;Mup1;Mup15;Mup17;Mup7;Mup12	14
A2AKN8;A2AKN9;A2BIM8;A2BIN1;A2CEK6;A2CEK7;A2CEL1;A9R9W0;B5X0G2;B8JI96;P02762;P04938;P11588;P11589;Q4FZE8;Q58EV3	ENSMUSG00000078687;ENSMUSG00000078688;ENSMUSG00000073834;ENSMUSG00000078674;ENSMUSG00000078680;ENSMUSG00000089873;ENSMUSG00000073830;ENSMUSG00000078683;ENSMUSG00000096674;ENSMUSG00000096688;ENSMUSG00000078686;ENSMUSG00000078675;ENSMUSG00000078673;ENSMUSG00000094793;ENSMUSG00000110439;ENSMUSG00000073842	Mup8;Mup2;Mup11;Mup18;Mup10;Mup13;Mup14;Mup1;Mup15;Mup17;Mup9;Mup16;Mup19;Mup12;Mup22;Mup7	16
A2AKN8;A2CEK6;B5X0G2;B8JI96;E9PVW0	ENSMUSG00000078687;ENSMUSG00000089873;ENSMUSG00000096688;ENSMUSG00000073830	Mup8;Mup13;Mup17;Mup14	4
A2AKN9;A2BIM8;A2BIN0;A9C496;A9C497;P02762;P04938	ENSMUSG00000078688;ENSMUSG00000073834;ENSMUSG00000078674;ENSMUSG00000078686;ENSMUSG00000078675;ENSMUSG00000078673	Mup2;Mup11;Mup18;Mup9;Mup16;Mup19	6
A2AKN9;A2BIM8;A2BIN0;P02762;P04938	ENSMUSG00000078688;ENSMUSG00000073834;ENSMUSG00000078674;ENSMUSG00000078686;ENSMUSG00000078675;ENSMUSG00000078673	Mup2;Mup11;Mup18;Mup9;Mup16;Mup19	6
A2AKN9;A2BIM8;A2BIN1;A9C496;A9C497;P02762;P04938;Q4FZE8	ENSMUSG00000078688;ENSMUSG00000073834;ENSMUSG00000078674;ENSMUSG00000078680;ENSMUSG00000078686;ENSMUSG00000078675;ENSMUSG00000078673;ENSMUSG00000110439	Mup2;Mup11;Mup18;Mup10;Mup9;Mup16;Mup19;Mup22	8
A2AKN9;A2BIM8;A2CEK7;A9C496;A9C497;P02762;P04938	ENSMUSG00000078688;ENSMUSG00000073834;ENSMUSG00000078674;ENSMUSG00000073830;ENSMUSG00000078686;ENSMUSG00000078675;ENSMUSG00000078673	Mup2;Mup11;Mup18;Mup14;Mup9;Mup16;Mup19	7
A2AKQ8;Q99J38	ENSMUSG00000075272;ENSMUSG00000075271	Ttc30a2;Ttc30a1	2
A2AKQ8;Q99J38;Q9CY00	ENSMUSG00000075272;ENSMUSG00000075271;ENSMUSG00000075273	Ttc30a2;Ttc30a1;Ttc30b	3
A2AMD0;Q05CL8	ENSMUSG00000066107;ENSMUSG00000027968	Gm12666;Larp7	2
A2APF3;A2APF3-2;Q61164	ENSMUSG00000070495;ENSMUSG00000005698	Ctcfl;Ctcf	2
A2APV2;A2APV2-2;A2APV2-3;A2AQW2;D3Z7A7;E9PXE6;F8VPR2;Q6ZPF4;Q6ZPF4-2	ENSMUSG00000036053;ENSMUSG00000023008	Fmnl2;Fmnl3	2
A2ARL4;A2ARV7;A2ARW5;D3YYR3	ENSMUSG00000078894;ENSMUSG00000074527;ENSMUSG00000078872;ENSMUSG00000078905	2210418O10Rik;Gm14296;Gm14401;Gm14393	4
A2ARL5;A2ART0;A2ARX1;A2BE23;A2BG91	ENSMUSG00000078877;ENSMUSG00000078903;ENSMUSG00000078887;ENSMUSG00000078878	Gm14295;Gm14391;Gm6710;Gm14305	4
A2ARP1;A2ARP1-2;A2ARP1-3;A2ARP1-7;E9Q9J4;Q6ZQB6;Q6ZQB6-2;Q6ZQB6-3	ENSMUSG00000033526;ENSMUSG00000040648	Ppip5k1;Ppip5k2	2
A2ART2;Q08BU3		Zfp968;Gm4724;Zfp967;Zfp966;Zfp970	5
A2ATT9;P61620;Q9CYJ6;Q9JLR1	ENSMUSG00000025816;ENSMUSG00000030082	Sec61a2;Sec61a1	2
A2AWN8;P59326;Q91YT7	ENSMUSG00000038848;ENSMUSG00000040025	Ythdf1;Ythdf2	2
A2AWR5;O88627	ENSMUSG00000079071;ENSMUSG00000027219	Slc28a2b;Slc28a2	2
A2BG95;A3KG49	ENSMUSG00000079531;ENSMUSG00000079534	Pwwp4d;Pwwp4c	2
A2BIN1;P11589;Q4FZE8	ENSMUSG00000078680;ENSMUSG00000110439	Mup10;Mup22	2
A2BIN1;Q4FZE8	ENSMUSG00000078680;ENSMUSG00000110439	Mup10;Mup22	2
A2CEK6;B5X0G2	ENSMUSG00000089873;ENSMUSG00000096688	Mup13;Mup17	2
A2CEK6;B5X0G2;L7N222	ENSMUSG00000089873;ENSMUSG00000096688	Mup13;Mup17	2
A2CEL0;A2CEL1;A9R9W0;L7MUC7;P11588	ENSMUSG00000078683;ENSMUSG00000096674;ENSMUSG00000073842;ENSMUSG00000094793	Mup1;Mup15;Mup7;Mup12	4
A2CEL0;A2CEL1;A9R9W0;P11588	ENSMUSG00000078683;ENSMUSG00000096674;ENSMUSG00000094793	Mup1;Mup15;Mup12	3
A2CEL1;A9R9W0;P11588	ENSMUSG00000078683;ENSMUSG00000096674;ENSMUSG00000094793	Mup1;Mup15;Mup12	3
A2CES4;D3Z0S6;Q62189;Q9CQI7	ENSMUSG00000008333;ENSMUSG00000061479	Snrpb2;Snrpa	2
A2CG44;A2CG45;E9Q3M0;P70340;P97454;Q62432;Q62432-2;Q8BUN5;Q8C3Y6;Q9JIW5	ENSMUSG00000032402;ENSMUSG00000024563;ENSMUSG00000031681;ENSMUSG00000021540;ENSMUSG00000027796	Smad3;Smad2;Smad1;Smad5;Smad9	5
A2CG44;E9Q3M0;E9Q5P9;F7BUP2;Q62432;Q62432-2;Q8BUN5;Q9JIW5	ENSMUSG00000032402;ENSMUSG00000024563;ENSMUSG00000027796	Smad3;Smad2;Smad9	3
A2CG44;E9Q3M0;E9Q5P9;Q62432;Q62432-2;Q8BUN5;Q9JIW5	ENSMUSG00000032402;ENSMUSG00000024563;ENSMUSG00000027796	Smad3;Smad2;Smad9	3
A2CG44;E9Q3M0;Q62432;Q62432-2;Q8BUN5;Q9JIW5	ENSMUSG00000032402;ENSMUSG00000024563;ENSMUSG00000027796	Smad3;Smad2;Smad9	3
A3KG57;Q3TFP0;Q9R0U0;Q9R0U0-2;Q9R0U0-3	ENSMUSG00000054679;ENSMUSG00000028676	Srsf12;Srsf10	2
A6H5X4;A6H5X4-2;A6H5X4-3;B4XVP9	ENSMUSG00000068245;ENSMUSG00000091144	Phf11d;Phf11c	2
A6NAS4;A6NAS6;A6NAS7;A6NAT4;A6NAT8;A6NAU1;D3Z7A4;E9PUT9;E9PVJ0;E9PW52;E9PW72;E9PYQ5;E9PZM0;E9PZN8;E9Q0R1;E9Q257;E9Q2A7;E9Q501;E9Q5P1;E9Q5Q3;E9Q7M8;E9Q9P5;E9Q9Z8;E9QAI8;E9QAJ8;K7N692;K7N693;K7N6G4;K7N6G6;K7N6M5;K7N6T3;K7N6T7;K7N6T8;K7N6U2;K7N6U3;K7N6U7;K7N6V0;K7N6V4;K7N6V6;K7N6X9;K7N6Y0;K7N6Y2;K7N6Y6;K7N6Y8;K7N708;K7N711;K7N714;K7N721;K7N723;K7N724;K7N734;K7N735;K7N743;K7N745;K7N746;K7N751;K7N754;…	ENSMUSG00000093985;ENSMUSG00000094825;ENSMUSG00000096003;ENSMUSG00000094460;ENSMUSG00000079389;ENSMUSG00000096793;ENSMUSG00000096039;ENSMUSG00000094929;ENSMUSG00000095533;ENSMUSG00000095368;ENSMUSG00000079409;ENSMUSG00000094258;ENSMUSG00000090707;ENSMUSG00000091754;ENSMUSG00000091568;ENSMUSG00000096775;ENSMUSG00000096839;ENSMUSG00000094634;ENSMUSG00000094706;ENSMUSG00000072739;ENSMUSG00000096869;…	Gm10406;Gm3194;Gm3500;Gm21560;Gm3149;Gm3002;D830030K20Rik;Gm3526;Gm10413;Gm3012;Gm5795;Gm8159;Gm8237;Gm3636;Gm8206;Gm5796;Gm3460;Gm3468;Gm10338;Gm10408;Gm6676;Gm16434;Gm3476;Gm3159;Gm2897;Gm7876;Gm3182;Gm9603;Gm3542;Gm3685;Gm3029;Gm8362;Gm8265;Gm3248;Gm8297;Gm3453;Gm3755;Gm3696;Gm3138;Gm8356;Gm5458;Gm9602;Gm3727;Gm2244;Gm6356;Gm10128;Gm3164;Gm3278;Gm8281;Gm3047;Gm3239;Gm8271;Gm5797;Gm3558;Gm3411;…	58
A6PWD6;Q5NCB2;Q5NCB3;Q5SVP0;Q5SVP2	ENSMUSG00000058163;ENSMUSG00000048852;ENSMUSG00000069893;ENSMUSG00000069892	Gm5431;Gm12185;9930111J21Rik1;9930111J21Rik2	4
A6PWD6;Q5NCB3;Q5SVP0;Q5SVP2;Q8CB10	ENSMUSG00000058163;ENSMUSG00000069893;ENSMUSG00000069892	Gm5431;9930111J21Rik1;9930111J21Rik2	3
A6X8I0;B1AZA0;D3Z4U6;L7MUF1;Q497S0;Q4KL04;Q4KL05;Q5M8P2;Q62478	ENSMUSG00000073267;ENSMUSG00000071788;ENSMUSG00000084063;ENSMUSG00000080725;ENSMUSG00000093923;ENSMUSG00000079655;ENSMUSG00000073257;ENSMUSG00000096620;ENSMUSG00000095887;ENSMUSG00000094624;ENSMUSG00000073247;ENSMUSG00000073245;ENSMUSG00000095293;ENSMUSG00000094759;ENSMUSG00000095546;ENSMUSG00000073255;ENSMUSG00000096457	Gm1993;Gm14525;Gm5934;Gm6121;Gm5935;Gm5168;Gm10488;Gm5169;Gm10096;Gm4836;Gm10486;Gm14819;Gm10058;Gm10487;Gm10230;Gm14632;Gm10147	17
A6X8J1;Q9D515	ENSMUSG00000096468;ENSMUSG00000081638;ENSMUSG00000094714;ENSMUSG00000067909	Gm16405;Gm14594;Gm16430;Gm7958;Slxl1	5
A6X925;B2KF55;B7ZBY6;B7ZBY7;E9PY39;Q9CZY3;Q9CZY3-2;Q9D2M8;Q9D2M8-2	ENSMUSG00000022674;ENSMUSG00000078923;ENSMUSG00000089739	Ube2v2;Ube2v1;Gm20431	3
A6X925;B7ZBY6;B7ZBY7;E9PY39;Q9CZY3;Q9CZY3-2;Q9D2M8;Q9D2M8-2	ENSMUSG00000022674;ENSMUSG00000078923;ENSMUSG00000089739	Ube2v2;Ube2v1;Gm20431	3
A6ZI46;D3YWI1;P05064;Q9CPQ9	ENSMUSG00000059343;ENSMUSG00000030695	Aldoart1;Aldoa	2
A8DUK4	ENSMUSG00000052305;ENSMUSG00000073940	Hbb-bs;Hbb-bt	2
A8DUK4;E9Q223	ENSMUSG00000052305;ENSMUSG00000073940	Hbb-bs;Hbb-bt	2
A8DUK4;E9Q223;P02088	ENSMUSG00000052305;ENSMUSG00000073940	Hbb-bs;Hbb-bt;Hbb-b1	3
A8DUK4;P02088	ENSMUSG00000052305;ENSMUSG00000073940	Hbb-bs;Hbb-bt;Hbb-b1	3
A9C497	ENSMUSG00000078686;ENSMUSG00000078675;ENSMUSG00000078673	Mup9;Mup16;Mup19	3
B0LM42;F6TBN8;F7BGR7;Q8C7Q4	ENSMUSG00000096370;ENSMUSG00000094936	Gm21992;Rbm4	2
B0LM42;F7BGR7;Q8C7Q4	ENSMUSG00000096370;ENSMUSG00000094936	Gm21992;Rbm4	2
B0QZJ0;Q5F2A1;Q5F2A3;Q5F2A4;Q8BXS2;Q9D777	ENSMUSG00000018752;ENSMUSG00000089669	Tnfsfm13;Tnfsf13	2
B0QZL1	ENSMUSG00000063524;ENSMUSG00000059040	Eno1;Eno1b	2
B0QZL1;P17182;Q6PHC1	ENSMUSG00000063524;ENSMUSG00000059040	Eno1;Eno1b	2
B0QZN5;P63024;P63044	ENSMUSG00000020894;ENSMUSG00000028955	Vamp2;Vamp3	2
B0QZP8;H3BIZ8;H3BJ78;H3BJY1;H3BKF4;O55101	ENSMUSG00000048277;ENSMUSG00000093485	Syngr2;Gm20708	2
B0QZP8;H3BIZ8;H3BJY1;H3BKF4;O55101	ENSMUSG00000048277;ENSMUSG00000093485	Syngr2;Gm20708	2
B0QZP9;O35493;O35493-2;P22518	ENSMUSG00000020385;ENSMUSG00000026034	Clk4;Clk1	2
B0QZW1;F2Z488;Q7TNB5;Q9Z2W9	ENSMUSG00000001986;ENSMUSG00000020524	Gria3;Gria1	2
B0R029;B0R030;E9Q8A1;O09044;P60879;Q9D3L3	ENSMUSG00000027287;ENSMUSG00000027273	Snap23;Snap25	2
B1APT1;B1AX06;E9PWC1;E9PYE1;E9Q0C0;Q91ZG2;Q9CZJ0	ENSMUSG00000016386;ENSMUSG00000041708	Mpped2;Mpped1	2
B1AQD7;Q8C4B4	ENSMUSG00000002058;ENSMUSG00000046562	Unc119;Unc119b	2
B1AQP7;Q3UZ24	ENSMUSG00000068252;ENSMUSG00000071716	Apol7b;Apol7e	2
B1ARP0;E9PXG7;O35469;P26150	ENSMUSG00000062410;ENSMUSG00000027869	Hsd3b3;Hsd3b6	2
B1ASA5;D3YX49;E9Q1A5;E9QA68;E9QAR1;E9QAR4;E9QAR6	ENSMUSG00000028799;ENSMUSG00000038346	Zfp362;Zfp384	2
B1AUQ7;P41209;Q9R1K9;Z4YJH1	ENSMUSG00000031347;ENSMUSG00000050996	Cetn2;Cetn1	2
B1AUY7;B1AUY8;B1AUY9;B1AUZ1;Q3UX61;Q3V4D5;Q9CQX6;Q9QY36	ENSMUSG00000031388;ENSMUSG00000046000;ENSMUSG00000057130	Naa10;Naa11;Txnl4a	3
B1AUY7;B1AUY8;B1AUY9;B1AUZ1;Q3UX61;Q3V4D5;Q9QY36	ENSMUSG00000031388;ENSMUSG00000046000	Naa10;Naa11	2
B1AUY7;B1AUY8;B1AUY9;B1AUZ1;Q3UX61;Q9QY36	ENSMUSG00000031388;ENSMUSG00000046000	Naa10;Naa11	2
B1AVF2;D3YZZ4;F6VXN4;Q9EQN3;Q9Z2S7;Q9Z2S7-3;Q9Z2S7-4	ENSMUSG00000031431;ENSMUSG00000029723	Tsc22d3;Tsc22d4	2
B1AWT2;B1AWT3;B1AWT4;Q7TT45;Q99K70	ENSMUSG00000028278;ENSMUSG00000028646	Rragd;Rragc	2
B1AWT2;B1AWT3;Q7TT45;Q99K70;Q99K70-2	ENSMUSG00000028278;ENSMUSG00000028646	Rragd;Rragc	2
B1AXH8;B7ZP57;E9QM80;O54972;O54972-2;Q3UQX8;Q61909	ENSMUSG00000006586;ENSMUSG00000006362	Runx1t1;Cbfa2t3	2
B1AXP0;Q9WUT3	ENSMUSG00000031309;ENSMUSG00000023809	Rps6ka3;Rps6ka2	2
B1AXZ0;B1AXZ4;B1AXZ5;B1AXZ6;Q3UR02;Q60899;Q61701;Q61701-10;Q61701-11;Q61701-2;Q61701-4;Q61701-5;Q61701-6;Q61701-7;Q61701-9;Q80UJ0;Q80Y51	ENSMUSG00000008489;ENSMUSG00000028546	Elavl2;Elavl4	2
B1AZI6;E9Q5E2	ENSMUSG00000037475;ENSMUSG00000097392	Thoc2;Thoc2l	2
B1AZL1;J3QJZ1;Q8R2V2	ENSMUSG00000041025;ENSMUSG00000094439	Iffo2;Gm21969	2
B1B0F6;Q3TIV9;Q7TN05;Q8BW87;Q9DB50	ENSMUSG00000031367;ENSMUSG00000054702	Ap1s2;Ap1s3	2
B2C3G8;P42230;P42232	ENSMUSG00000004043;ENSMUSG00000020919	Stat5a;Stat5b	2
B2FDH0;B2FDH7;D3YW10;D3YXD1;P52483;Q91W82	ENSMUSG00000027011;ENSMUSG00000058317	Ube2e3;Ube2e2	2
B2KF73;O88892;P84102	ENSMUSG00000021643;ENSMUSG00000074884	Serf1;Serf2	2
B2KF83;F6Q785;Q9D110	ENSMUSG00000066442;ENSMUSG00000100838	Mthfs;Gm29094	2
B2KF83;L7N466;Q9D110	ENSMUSG00000066442;ENSMUSG00000079427	Mthfs;Mthfsl	2
B2RPU8;D3Z5B1;Q9D1L0	ENSMUSG00000034173;ENSMUSG00000070493	Zbed5;Chchd2	2
B2RQR8;B2RQR8-2;E9Q1S5;P0DPD9;P0DPD9-2	ENSMUSG00000022842;ENSMUSG00000115293	Ece2;Gm49333	2
B2RT14;D3YZ96;D3YZE6;D3Z748;D3Z7G0;E9PXN7;K9J7B2;P70691;Q62452;Q63886;Q64435	ENSMUSG00000089943;ENSMUSG00000054545;ENSMUSG00000090124;ENSMUSG00000090165;ENSMUSG00000090145;ENSMUSG00000090171;ENSMUSG00000090175;ENSMUSG00000089960	Ugt1a5;Ugt1a6a;Ugt1a7c;Ugt1a10;Ugt1a6b;Ugt1a2;Ugt1a9;Ugt1a1	8
B2RT14;D3YZ96;D3YZE6;D3Z748;D3Z7G0;E9PXN7;K9J7B2;P70691;Q62452;Q63886;Q64435;Q6ZQM8	ENSMUSG00000089943;ENSMUSG00000054545;ENSMUSG00000090124;ENSMUSG00000090165;ENSMUSG00000090145;ENSMUSG00000090171;ENSMUSG00000090175;ENSMUSG00000089960	Ugt1a5;Ugt1a6a;Ugt1a7c;Ugt1a10;Ugt1a6b;Ugt1a2;Ugt1a9;Ugt1a1	8
B2RT14;D3YZ96;D3YZE6;D3Z748;D3Z7G0;E9PXN7;P70691;Q62452;Q63886	ENSMUSG00000089943;ENSMUSG00000054545;ENSMUSG00000090124;ENSMUSG00000090165;ENSMUSG00000090171;ENSMUSG00000090175;ENSMUSG00000089960	Ugt1a5;Ugt1a6a;Ugt1a7c;Ugt1a10;Ugt1a2;Ugt1a9;Ugt1a1	7
B2RT89;E9PVA5;Q3V3G0;Q96LX3	ENSMUSG00000063590;ENSMUSG00000052562	Slc22a28;Slc22a30	2
B2RV77;Q9D8D6	ENSMUSG00000079597;ENSMUSG00000095620	Cstdc4;Csta2	2
B2RY53;Q6ZWZ7;Q9CPR4	ENSMUSG00000090451;ENSMUSG00000062328	Gm6133;Rpl17	2
B7ZBY6;B7ZBY7;E9PY39;Q9CZY3;Q9CZY3-2	ENSMUSG00000078923;ENSMUSG00000089739	Ube2v1;Gm20431	2
B7ZBY7;E9PY39;Q9CZY3;Q9CZY3-2	ENSMUSG00000078923;ENSMUSG00000089739	Ube2v1;Gm20431	2
B7ZCM9;B7ZCN0;D6RGQ7;E0CXG8;P0C872	ENSMUSG00000033852;ENSMUSG00000098789	Gm28042;Jmjd7	2
B7ZCM9;B7ZCN0;E0CXG8;P0C872	ENSMUSG00000033852;ENSMUSG00000098789	Gm28042;Jmjd7	2
B7ZCP9;B7ZCQ0;B7ZCQ1;F6YJB6;Q8R4X3;V9GXJ1	ENSMUSG00000089824;ENSMUSG00000098950	Rbm12;Gm28036	2
B7ZNA5;D3YY34;Q8CHP6;Q9QWH1;Q9QWH1-2	ENSMUSG00000037652;ENSMUSG00000028796	Phc3;Phc2	2
B8JJI9;D3YYP4;F7CII1;P43135;Q32NY6;Q60632	ENSMUSG00000069171;ENSMUSG00000030551	Nr2f1;Nr2f2	2
B8JJM3;B8JJM5;B8JJM6;B8JJN0;F6VQX8;F6W2T4;F6XQ00;H3BK95;P04186	ENSMUSG00000090231;ENSMUSG00000092511	Cfb;Gm20547	2
B8JJM5;B8JJM6;B8JJN0;F6VQX8;F6W2T4;F6XQ00;H3BK95;P04186	ENSMUSG00000090231;ENSMUSG00000092511	Cfb;Gm20547	2
B8JJM5;B8JJM6;B8JJN0;F6VQX8;F6XQ00;H3BK95;P04186	ENSMUSG00000090231;ENSMUSG00000092511	Cfb;Gm20547	2
B8JJM5;B8JJM6;B8JJN0;F6VQX8;F6XQ00;P04186	ENSMUSG00000090231;ENSMUSG00000092511	Cfb;Gm20547	2
C0H5X4;P32883	ENSMUSG00000025499;ENSMUSG00000030265	Hras;Kras	2
C0H5X4;P32883;P32883-2	ENSMUSG00000025499;ENSMUSG00000030265	Hras;Kras	2
C0HK79;C0HK80	ENSMUSG00000048355;ENSMUSG00000048040	Arxes1;Arxes2	2
C0HKD8;C0HKD9	ENSMUSG00000068479;ENSMUSG00000048222	Mfap1a;Mfap1b	2
C0HKE1;C0HKE2;C0HKE3;C0HKE4;C0HKE5;C0HKE6;C0HKE7;C0HKE8;C0HKE9;Q8BFU2;Q8CGP4;Q8CGP5;Q8CGP6;Q8CGP7	ENSMUSG00000071478;ENSMUSG00000069301;ENSMUSG00000061615;ENSMUSG00000094777;ENSMUSG00000069309;ENSMUSG00000071516;ENSMUSG00000094248;ENSMUSG00000069270;ENSMUSG00000069272;ENSMUSG00000078851;ENSMUSG00000060081;ENSMUSG00000061991;ENSMUSG00000069302;ENSMUSG00000063021	H2ac7;H2ac11;H2ac4;H2ac24;H2ac22;H2ac13;H2ac23;H2ac6;H2ac8;H2aw;H2ac1;H2ac10;H2ac12;H2ac15	14
D3YU78;D3Z6W5;Q9CR23;Q9JJR8	ENSMUSG00000031021;ENSMUSG00000026411	Tmem9b;Tmem9	2
D3YUB9;D3Z055;D3Z5F7;G3UWS5	ENSMUSG00000022194;ENSMUSG00000092232	Pabpn1;Gm20521	2
D3YUB9;D3Z055;D3Z5F7;G3UWS5;G3UX74;G3UY42;Q8CCS6;Q8CCS6-2	ENSMUSG00000022194;ENSMUSG00000092232	Pabpn1;Gm20521	2
D3YUB9;D3Z055;D3Z5F7;G3UWS5;G3UY42;Q8CCS6;Q8CCS6-2	ENSMUSG00000022194;ENSMUSG00000092232	Pabpn1;Gm20521	2
D3YUJ3;E9Q226;Q8BGU5;Q8BGU5-2	ENSMUSG00000070871;ENSMUSG00000024286	Ccnyl1;Ccny	2
D3YUS1;D3YYW4;O54950;Q8BIQ9;Q91WG5;Q91WG5-2	ENSMUSG00000028944;ENSMUSG00000067713	Prkag2;Prkag1	2
D3YUT9;P62818	ENSMUSG00000105518;ENSMUSG00000001021	Gm42674;S100a3	2
D3YV69;P35279;P35279-2;P61294	ENSMUSG00000030704;ENSMUSG00000032549	Rab6a;Rab6b	2
D3YVJ5;D3YVU0;P62069;Q9D9M2	ENSMUSG00000054814;ENSMUSG00000029640	Usp46;Usp12	2
D3YVJ5;D3YVU0;P62069;Q9D9M2;Q9D9M2-2	ENSMUSG00000054814;ENSMUSG00000029640	Usp46;Usp12	2
D3YVP5;D3YVP6;D3YZ29;E9QAC8;Q80W21;Q8R5I6	ENSMUSG00000004035;ENSMUSG00000027890	Gstm7;Gstm4	2
D3YVU0;P62069;Q9D9M2;Q9D9M2-2	ENSMUSG00000054814;ENSMUSG00000029640	Usp46;Usp12	2
D3YVW4;D3YXV4;D3Z1F6;D3Z3V0;Q8VDU5;REV__Q62231;REV__Q62232	ENSMUSG00000038145;ENSMUSG00000051367;ENSMUSG00000024134	Snrk;Six1;Six2	3
D3YW10;D3YXD1;H3BL23;P52483;Q91W82	ENSMUSG00000058317;ENSMUSG00000027011	Ube2e2;Ube2e3	2
D3YWJ8;D3YYB5;G5E8P9;Q8K0T4	ENSMUSG00000041298;ENSMUSG00000106892	Katnal1;Gm42791	2
D3YWY4;D3YZL8;D3Z6T4;E0CXE0;E0CXS4;E0CYS1;G3XA20;H7BX09;H7BX90;Q6GQT7;Q925T6;Q925T6-2;Q925T6-3	ENSMUSG00000034813;ENSMUSG00000030098	Grip1;Grip2	2
D3YXH0;P63054	ENSMUSG00000117081;ENSMUSG00000090223	Gm49948;Pcp4	2
D3YXK2;Q80YR5;S4R1M2	ENSMUSG00000071054;ENSMUSG00000042625	Safb;Safb2	2
D3YY49;Q3UT41	ENSMUSG00000087303;ENSMUSG00000024766	Lipo2;Lipo3	2
D3YY55;E9Q317;O55128	ENSMUSG00000061104;ENSMUSG00000021963	Sap18b;Sap18	2
D3YY63;E9PX91;F6TVX7;F7C386;Q8BSF4	ENSMUSG00000023452;ENSMUSG00000093574	Pisd;Gm20671	2
D3YY73;D3Z2N9;E9Q317;O55128	ENSMUSG00000061104;ENSMUSG00000021963	Sap18b;Sap18	2
D3YYB5;G5E8P9;Q8K0T4	ENSMUSG00000106892;ENSMUSG00000041298	Gm42791;Katnal1	2
D3YYL1;Q921K9;Q921K9-2;Q9CXE2;Q9CXE2-2	ENSMUSG00000029681;ENSMUSG00000029438	Bcl7b;Bcl7a	2
D3YYP4;P43135;Q60632	ENSMUSG00000030551;ENSMUSG00000069171	Nr2f2;Nr2f1	2
D3YYU4;D3Z3L3;E9PV98	ENSMUSG00000060441;ENSMUSG00000057143	Trim5;Trim12c	2
D3YZ57;F6UND7;P05480;P05480-1;P08103;P08103-2;P25911;P25911-2;P39688;P39688-2	ENSMUSG00000019843;ENSMUSG00000003283;ENSMUSG00000027646;ENSMUSG00000042228	Fyn;Hck;Src;Lyn	4
D3YZ57;P05480;P05480-1;P39688;P39688-2	ENSMUSG00000019843;ENSMUSG00000027646	Fyn;Src	2
D3YZ57;P39688;P39688-2;Q04736	ENSMUSG00000019843;ENSMUSG00000014932	Fyn;Yes1	2
D3YZS0;Q3TQP0;Q9CQY2	ENSMUSG00000038646;ENSMUSG00000074826	Ramac;Gm10767	2
D3YZV3;D3Z6A6;E9Q6L7;P10648	ENSMUSG00000057933;ENSMUSG00000074179	Gsta2;Gsta5	2
D3YZV3;D3Z6A6;P10648;P13745	ENSMUSG00000057933;ENSMUSG00000074183	Gsta2;Gsta1	2
D3YZV3;D3Z6A6;P10648;P13745;Q6P8Q0	ENSMUSG00000057933;ENSMUSG00000074183;ENSMUSG00000111709	Gsta2;Gsta1;Gm3776	3
D3YZX3;D3Z1M1;D3Z1T4;E9PWM7;E9QKR0;H3BKR2;H3BLF7;P29387;P62874;P62880	ENSMUSG00000029713;ENSMUSG00000029064;ENSMUSG00000027669	Gnb2;Gnb1;Gnb4	3
D3YZX3;E9QKR0;H3BKR2;H3BLF7;P62874	ENSMUSG00000029713;ENSMUSG00000029064	Gnb2;Gnb1	2
D3YZY0;P62737;P63268	ENSMUSG00000059430;ENSMUSG00000035783	Actg2;Acta2	2
D3Z0J2;D3Z148;H3BKG0;P49817;P49817-2;P51637	ENSMUSG00000007655;ENSMUSG00000062694	Cav1;Cav3	2
D3Z1F2;E9Q8M4;H3BLK7;Q8R3P7	ENSMUSG00000014232;ENSMUSG00000093575	Cluap1;Gm20695	2
D3Z1M1;D3Z1T4;E9QKR0;P29387;P62880	ENSMUSG00000029713;ENSMUSG00000027669	Gnb2;Gnb4	2
D3Z1W5;D3Z6M7;L7N245;P50236;Q3UEP5	ENSMUSG00000074375;ENSMUSG00000074377;ENSMUSG00000070811	Sult2a3;Sult2a4;Sult2a2	3
D3Z298;H3BL34;Q64176;Q91WU0	ENSMUSG00000061959;ENSMUSG00000031725	Ces1e;Ces1f	2
D3Z2B3;D3Z7X0;Q8K370	ENSMUSG00000042647;ENSMUSG00000029456	Acad12;Acad10	2
D3Z2H9;D3Z6I8;E9Q5J9;P21107-2	ENSMUSG00000058126;ENSMUSG00000027940	Tpm3-rs7;Tpm3	2
D3Z2H9;D3Z6I8;E9Q7Q3;P21107-2	ENSMUSG00000058126;ENSMUSG00000027940	Tpm3-rs7;Tpm3	2
D3Z2H9;E9Q5J9;P21107-2	ENSMUSG00000058126;ENSMUSG00000027940	Tpm3-rs7;Tpm3	2
D3Z2H9;P21107-2	ENSMUSG00000058126;ENSMUSG00000027940	Tpm3-rs7;Tpm3	2
D3Z2L1;D3Z7I0;Q3UU56;Q8BL74	ENSMUSG00000106864;ENSMUSG00000101678	Gtf3c2;Gm29609	2
D3Z2N9;E9Q317;O55128	ENSMUSG00000061104;ENSMUSG00000021963	Sap18b;Sap18	2
D3Z2T9;E3W997;P11440;P97377;P97377-2;Q3V3A1;Q3V3A1-3	ENSMUSG00000019942;ENSMUSG00000026023;ENSMUSG00000025358	Cdk1;Cdk15;Cdk2	3
D3Z2U7;D3Z326;D3Z6A5;D3Z7M6;D3Z7P7;E9PWV9;F6Q346;F6QKL8;F6QWT6;F6U9F5;F6VJ22;F6W4F5;P27699-10;P27699-11;P27699-2;P27699-5;P27699-6;P27699-7;P27699-8;Q01147;Q01147-1;Q62347	ENSMUSG00000063889;ENSMUSG00000025958	Crem;Creb1	2
D3Z2W7;O09158	ENSMUSG00000061292;ENSMUSG00000029630	Cyp3a59;Cyp3a25	2
D3Z359;Q99KH8;Q9Z2W1	ENSMUSG00000026277;ENSMUSG00000063410	Stk25;Stk24	2
D3Z392;D3Z497;Q9WTZ1	ENSMUSG00000051234;ENSMUSG00000048185	Rnf7;Gm7075	2
D3Z3K7;P08046;P08152;P08152-2;P43300;Q3ZB14	ENSMUSG00000037868;ENSMUSG00000038418;ENSMUSG00000033730	Egr2;Egr1;Egr3	3
D3Z3L3;E9PV98	ENSMUSG00000057143;ENSMUSG00000060441	Trim12c;Trim5	2
D3Z3T5;P49586;Q811Q9;Q811Q9-2	ENSMUSG00000005615;ENSMUSG00000035246	Pcyt1a;Pcyt1b	2
D3Z494;G5E895;P45377;S4R2G9	ENSMUSG00000061758;ENSMUSG00000029762	Akr1b10;Akr1b8	2
D3Z497;Q9WTZ1	ENSMUSG00000048185;ENSMUSG00000051234	Gm7075;Rnf7	2
D3Z4I3;G3UWQ8;G3UXN1;Q62176	ENSMUSG00000038132;ENSMUSG00000027510	Rbm24;Rbm38	2
D3Z4I3;G3UWX7;Q62176	ENSMUSG00000038132;ENSMUSG00000027510	Rbm24;Rbm38	2
D3Z5B1;Q9D1L0	ENSMUSG00000034173;ENSMUSG00000070493	Zbed5;Chchd2	2
D3Z5F6;F8VQB8;H3BLN6;Q3UK98;Q9DBY5	ENSMUSG00000089715;ENSMUSG00000089837	Cbx6;Npcd	2
D3Z5G0;Q3UPZ5;Q3V3Q4	ENSMUSG00000073491;ENSMUSG00000066677	Ifi213;Ifi208	2
D3Z5G7;P23953	ENSMUSG00000078964;ENSMUSG00000057400	Ces1b;Ces1c	2
D3Z5G7;Q8VCC2;Q8VCT4	ENSMUSG00000078964;ENSMUSG00000057074;ENSMUSG00000056973	Ces1b;Ces1g;Ces1d	3
D3Z5P0;G3UWV4;G3UXM5;G3UYN4;G3UZ00;G3UZ19;Q5RJI5;Q5RJI5-2;Q5RJI5-4;Q69Z98;Q69Z98-2;Q69Z98-3;Q69Z98-4	ENSMUSG00000035390;ENSMUSG00000053046	Brsk1;Brsk2	2
D3Z647;Q7TSS2;Q7TSS2-2;Q8BW45;Q8K2Z8;Q8K2Z8-2	ENSMUSG00000032307;ENSMUSG00000042572;ENSMUSG00000045291	Ube2q2;Ube2q1;E330021D16Rik	3
D3Z6F0;E9PXF7;Q3U687;Q64282	ENSMUSG00000079339;ENSMUSG00000067297;ENSMUSG00000034459	Ifit1bl1;Ifit1bl2;Ifit1	3
D3Z6I0;Q5FWX6;Q62101;Q8K1Y2	ENSMUSG00000024070;ENSMUSG00000002688	Prkd3;Prkd1	2
D3Z6M7;K7N6K9;L7N245;P50236	ENSMUSG00000074377;ENSMUSG00000078799	Sult2a4;Sult2a5	2
D3Z6W5;Q9CR23;Q9JJR8	ENSMUSG00000031021;ENSMUSG00000026411	Tmem9b;Tmem9	2
D3Z748;P70691;Q62452;Q6ZQM8	ENSMUSG00000090171;ENSMUSG00000090175;ENSMUSG00000090124	Ugt1a2;Ugt1a9;Ugt1a7c	3
D3Z783;P31750;Q60823	ENSMUSG00000001729;ENSMUSG00000004056	Akt1;Akt2	2
D3Z793;D3Z7C2;D3Z7S8;D6RIQ7;Q05C74;Q80ZM7;REV__E9Q4F7;REV__E9Q4F8	ENSMUSG00000033543;ENSMUSG00000035569	Gtf2a2;Ankrd11	2
D3Z794;G3UWI9;G3UWX9;G3UZ60;G3UZA7;G3UZX6;H7BWX9;P61957;Q9Z172;Q9Z172-2	ENSMUSG00000020738;ENSMUSG00000020265;ENSMUSG00000112241	Sumo2;Sumo3;Gm49325	3
D3Z794;G3UZX6;H7BWX9;P61957	ENSMUSG00000020738;ENSMUSG00000020265	Sumo2;Sumo3	2
D3Z7G0;G3UZC9;P70691	ENSMUSG00000090165;ENSMUSG00000090171	Ugt1a10;Ugt1a2	2
D3Z7I0;Q3UU56;Q8BL74	ENSMUSG00000106864;ENSMUSG00000101678	Gtf3c2;Gm29609	2
D6RFQ2;E9PXK7;Q9Z210	ENSMUSG00000106447;ENSMUSG00000028102	Gm42957;Pex11b	2
D6RFQ2;E9PXZ3;E9Q6R1	ENSMUSG00000106447;ENSMUSG00000090210	Gm42957;Itga10	2
D6RFS9;G5E8V2;Q61865	ENSMUSG00000095538;ENSMUSG00000089661	Gm21983;Mia	2
D6RFT6;Q3TM43;Q3TXV4;Q921E2	ENSMUSG00000027519;ENSMUSG00000056515	Rab22a;Rab31	2
D6RH79;F6R114;Q3TZX3;Q8BZJ4;Q922G0	ENSMUSG00000032449;ENSMUSG00000028982	Slc25a36;Slc25a33	2
D6RH79;F6R114;Q3TZX3;Q922G0	ENSMUSG00000032449;ENSMUSG00000028982	Slc25a36;Slc25a33	2
D6RHM5;G3UVU8;P63271;Q9Z199	ENSMUSG00000020485	Supt4a;Supt4b	2
D6RI20;Q9CR20	ENSMUSG00000117732;ENSMUSG00000090000	Gm50364;Ier3ip1	2
D6RII5;Q80YQ8;Q91YQ7	ENSMUSG00000001054;ENSMUSG00000002222	Rmnd5b;Rmnd5a	2
D9J2V6;G3UXL9;O35984;P41778;P41778-2;Q3UR63;V9GXB8	ENSMUSG00000052534;ENSMUSG00000034673	Pbx1;Pbx2	2
E0CX23;E0CXP6;E0CYZ5;E0CZ38;E0CZ61	ENSMUSG00000089862;ENSMUSG00000107705	Umad1;Gm45062	2
E0CXL1;E0CY74;E9PV05;E9Q3M7;E9Q422;Q6NSQ5	ENSMUSG00000052477;ENSMUSG00000089844;ENSMUSG00000070031	C130026I21Rik;A530032D15Rik;Sp140	3
E0CXN5;P13707;Q3ULJ0;Q3ULJ0-2	ENSMUSG00000023019;ENSMUSG00000050627	Gpd1;Gpd1l	2
E0CXS2;E0CXS9;E0CXU1;E0CY14;E9Q2Q6;F6TS96;F6ZBY9;F8WIE2;J3KMT7;Q08122;Q08122-1;Q08122-2;Q08122-4;Q3TY99;Q5SQA2;Q5SQA3;Q5SQA4;Q62440;Q62440-2;Q62440-3;Q62440-5;Q62440-6;Q62441	ENSMUSG00000032280;ENSMUSG00000008305;ENSMUSG00000024642	Tle3;Tle1;Tle4	3
E0CY72;E0CYA7;P0CB42	ENSMUSG00000079036	Alkbh1;Nrp	2
E0CY81;Q62511;Q62511-2	ENSMUSG00000118491;ENSMUSG00000024695	Gm44505;Zfp91	2
E0CYA3;G1K381;P54754;Q03145;Q62413;Q8CBF3;Q8CBF3-2	ENSMUSG00000005958;ENSMUSG00000055540;ENSMUSG00000006445;ENSMUSG00000032537	Ephb3;Epha6;Epha2;Ephb1	4
E0CYA3;P54754;Q8CBF3;Q8CBF3-2	ENSMUSG00000005958;ENSMUSG00000032537	Ephb3;Ephb1	2
E0CYC4;E9Q6E2;Q8BWD8;Q8R3L8;Q8R3L8-3	ENSMUSG00000029635;ENSMUSG00000038481	Cdk8;Cdk19	2
E0CYC6;E9PUL7;Q8CHQ9;Q9JIY7;Q9JIZ0	ENSMUSG00000057103;ENSMUSG00000033634;ENSMUSG00000030004	Nat8f1;Nat8f2;Nat8	3
E0CYC6;E9PUL7;Q9JIY7;Q9JIZ0	ENSMUSG00000057103;ENSMUSG00000030004	Nat8f1;Nat8	2
E0CZ27;F8WI35;P02301;P68433;P84244	ENSMUSG00000060743;ENSMUSG00000016559;ENSMUSG00000101972;ENSMUSG00000069265;ENSMUSG00000101355;ENSMUSG00000099517	H3f3a;H3f3b;H3c11;H3c1;H3c10;H3c8	6
E0CZ27;F8WI35;P02301;P84244	ENSMUSG00000060743;ENSMUSG00000016559	H3f3a;H3f3b	2
E0CZ27;P02301;P84244	ENSMUSG00000060743;ENSMUSG00000016559	H3f3a;H3f3b	2
E0CZ90;G3X9V0	ENSMUSG00000079197;ENSMUSG00000078153	Psme2;Psme2b	2
E0CZ90;G3X9V0;P97372	ENSMUSG00000079197;ENSMUSG00000078153	Psme2;Psme2b	2
E9PUA5;Q9QWT9;Q9QWT9-2;Q9QWT9-3	ENSMUSG00000024301;ENSMUSG00000079553	Kifc5b;Kifc1	2
E9PUF4;E9PYZ7;E9Q640;Q5SFM8;Q5SFM8-2;Q6NZN0;Q6NZN0-2;Q6NZN0-3;Q6NZN0-4;Q6NZN0-5	ENSMUSG00000022119;ENSMUSG00000024491	Rbm26;Rbm27	2
E9PUY9;E9PVM6;E9PY42;E9PYA9;E9PYC6;E9Q7A8;E9Q858;Q3TCD4;Q78JN3;Q9WUR2;Q9WUR2-2	ENSMUSG00000021417;ENSMUSG00000021416	Eci2;Eci3	2
E9PUZ5;E9QAC6;Q62083	ENSMUSG00000068206;ENSMUSG00000116121	Pick1;Gm49486	2
E9PV07;E9Q2Q6;F6ZBY9;Q3UN01;Q5SQA2;Q5SQA3;Q5SQA4;Q5SQA5;Q62440;Q62440-2;Q62440-3;Q62440-4;Q62440-5;Q62440-6;Q62440-7;Q62440-8;Q62441;Q9WVB2	ENSMUSG00000034771;ENSMUSG00000008305;ENSMUSG00000024642	Tle2;Tle1;Tle4	3
E9PV48;Q64345	ENSMUSG00000062488;ENSMUSG00000074896	Ifit3b;Ifit3	2
E9PV68;E9Q199;E9Q1I2;Q8BGW5;Q8BGW5-2;Q8R2Y9	ENSMUSG00000025374;ENSMUSG00000026107	Nabp2;Nabp1	2
E9PV85;P00688	ENSMUSG00000070360;ENSMUSG00000093931;ENSMUSG00000096770;ENSMUSG00000096569;ENSMUSG00000074268	Amy2a1;Amy2a3;Amy2a4;Amy2a2;Amy2a5	5
E9PVL3;Q504N7;Q8BV49	ENSMUSG00000070501;ENSMUSG00000043263	Ifi214;Ifi209	2
E9PVN6;Q9D6K5-4	ENSMUSG00000021139;ENSMUSG00000090935	Gm20498;Synj2bp	2
E9PVN6;Q9D6K5;Q9D6K5-2;Q9D6K5-3;Q9D6K5-4	ENSMUSG00000021139;ENSMUSG00000090935	Gm20498;Synj2bp	2
E9PVR2;F8VQM8;Q9R244;Q9R244-2;Q9R244-3;Q9R244-4	ENSMUSG00000099481;ENSMUSG00000070425;ENSMUSG00000100254	Xndc1;Xntrpc;Trpc2	3
E9PW43;Q9CQS8	ENSMUSG00000092116;ENSMUSG00000053317	Gm10320;Sec61b	2
E9PWT4;E9QJR9;G3UZP7;L7N260;P01897;P01899;P14427;P14429;P14430;P14431;P79568;Q8HWB2	ENSMUSG00000060550;ENSMUSG00000073411;ENSMUSG00000073409;ENSMUSG00000035929	H2-Q7;H2-D1;H2-Q6;H2-Q4	4
E9PWV3;F6Q8A4;F6RQA2;G3UZI3;P18653;Q505N6;Q9WUT3	ENSMUSG00000003644;ENSMUSG00000023809	Rps6ka1;Rps6ka2	2
E9PX10;Q8BML3;Q9D8C3;Q9D8C3-2	ENSMUSG00000041718;ENSMUSG00000031286	Alg13;Glt28d2	2
E9PX23;E9Q794;F8WHY8;Q3U3A7;Q3UII8;Q8K4B0;Q924K8;Q924K8-2	ENSMUSG00000021144;ENSMUSG00000055817	Mta1;Mta3	2
E9PX91;F6TVX7;F7C386;Q8BSF4	ENSMUSG00000023452;ENSMUSG00000093574	Pisd;Gm20671	2
E9PX95;Q6AXE3;Q8R420	ENSMUSG00000035435;ENSMUSG00000024130	Abca17;Abca3	2
E9PXC0;P14576	ENSMUSG00000079108;ENSMUSG00000112449;ENSMUSG00000073079	Srp54c;Srp54b;Srp54a	3
E9PXC2;E9Q722;F6PWU6;F8WI12;Q61069;Q64705;Q64705-2	ENSMUSG00000058239;ENSMUSG00000026641	Usf2;Usf1	2
E9PY85;E9Q4P7;G3UZF1;Q99L28	ENSMUSG00000032215;ENSMUSG00000092310	Rsl24d1;Gm20509	2
E9PYU5;E9Q973;Q8R368	ENSMUSG00000089865;ENSMUSG00000092192	Gm44503;Dnaaf4	2
E9PYZ4;J3QNR8;K7N6K2;Q99PP6;Q99PP6-2;Q99PP6-3	ENSMUSG00000056144;ENSMUSG00000090215	Trim34a;Trim34b	2
E9PZ11;F2Z3V9;F2Z443;Q5DU09	ENSMUSG00000013419;ENSMUSG00000075595	Zfp651;Zfp652	2
E9PZF0;Q01768	ENSMUSG00000091228;ENSMUSG00000020857	Gm20390;Nme2	2
E9PZF0;Q01768;Q5NC80	ENSMUSG00000091228;ENSMUSG00000020857;ENSMUSG00000037601	Gm20390;Nme2;Nme1	3
E9PZI6;E9QKG2;Q8K0T4;Q9WV86	ENSMUSG00000019794;ENSMUSG00000041298	Katna1;Katnal1	2
E9PZM8;F8VQB8;H3BLN6;Q99J85	ENSMUSG00000022421;ENSMUSG00000089837	Nptxr;Npcd	2
E9Q048;F6UWZ4;Q8C5D3	ENSMUSG00000036552;ENSMUSG00000116895;ENSMUSG00000116953	Ermard;Gm3435;9030025P20Rik	3
E9Q0H0;O88575;Q8VDB9	ENSMUSG00000036814;ENSMUSG00000025243	Slc6a20a;Slc6a20b	2
E9Q0Q3;G3UY09	ENSMUSG00000091474;ENSMUSG00000092416	2610021A01Rik;Zfp141	2
E9Q0Q3;Q3US17	ENSMUSG00000091474;ENSMUSG00000045598	2610021A01Rik;Zfp553	2
E9Q117;E9Q2P0;E9QAW9;G3X909;Q80TR4	ENSMUSG00000025020;ENSMUSG00000031558	Slit1;Slit2	2
E9Q150;E9Q967;Q60838;Q61062	ENSMUSG00000003233;ENSMUSG00000020888	Dvl3;Dvl2	2
E9Q1F2;E9Q5F4;G3UZ07;P60710	ENSMUSG00000029580;ENSMUSG00000062825	Actb;Actg1	2
E9Q1F2;E9Q5F4;G3UZ07;P60710;P63260	ENSMUSG00000029580;ENSMUSG00000062825	Actb;Actg1	2
E9Q1F2;G3UZ07;P60710	ENSMUSG00000029580;ENSMUSG00000062825	Actb;Actg1	2
E9Q1F2;G3UZ07;P60710;P63260	ENSMUSG00000029580;ENSMUSG00000062825	Actb;Actg1	2
E9Q223	ENSMUSG00000052305;ENSMUSG00000073940	Hbb-bs;Hbb-bt	2
E9Q2A2;Q8BUX5	ENSMUSG00000103766;ENSMUSG00000104445	Gm38392;Rhbg	2
E9Q2Q6;F6ZBY9;Q5SQA2;Q5SQA3;Q5SQA4;Q62440;Q62440-2;Q62440-3;Q62440-4;Q62440-5;Q62440-6;Q62441	ENSMUSG00000008305;ENSMUSG00000024642	Tle1;Tle4	2
E9Q2Q6;F6ZBY9;Q5SQA2;Q5SQA3;Q5SQA4;Q62440;Q62440-2;Q62440-3;Q62440-5;Q62440-6;Q62441	ENSMUSG00000008305;ENSMUSG00000024642	Tle1;Tle4	2
E9Q3E1;J3QMK6;Q80VQ0	ENSMUSG00000075296;ENSMUSG00000037263;ENSMUSG00000024885	Aldh3b2;Aldh3b3;Aldh3b1	3
E9Q3I1;F7CUK9;P04342	ENSMUSG00000025945;ENSMUSG00000067299	Crygf;Crygd	2
E9Q3P9;F8WGS1;G3UY29;G3UZD3;G3UZL4;P46638	ENSMUSG00000004771;ENSMUSG00000077450	Rab11a;Rab11b	2
E9Q3P9;F8WGS1;G3UY29;G3UZD3;G3UZL4;P46638;P62492	ENSMUSG00000004771;ENSMUSG00000077450	Rab11a;Rab11b	2
E9Q3P9;F8WGS1;G3UY29;G3UZD3;P46638	ENSMUSG00000004771;ENSMUSG00000077450	Rab11a;Rab11b	2
E9Q3P9;F8WGS1;G3UY29;G3UZD3;P46638;P62492	ENSMUSG00000004771;ENSMUSG00000077450	Rab11a;Rab11b	2
E9Q481;Q6P2K6;Q922R5-2	ENSMUSG00000041846;ENSMUSG00000020463	Ppp4r3a;Ppp4r3b	2
E9Q4P0;E9QNP0;P62984	ENSMUSG00000055553;ENSMUSG00000090137	Kxd1;Uba52	2
E9Q4T0;E9QKG8;Q6PG16;Q6PG16-2;Q6PG16-3	ENSMUSG00000044783	Hjurp;A730008H23Rik	2
E9Q5K8;Q3U1U4	ENSMUSG00000030786;ENSMUSG00000108596	Itgam;Gm49368	2
E9Q634;G3V011;P70248;Q8CG29	ENSMUSG00000032220;ENSMUSG00000024300	Myo1e;Myo1f	2
E9Q6L7;Q6P8Q0	ENSMUSG00000074179;ENSMUSG00000111709	Gsta5;Gm3776	2
E9Q6M7;F6YD01;Q3TQ29;Q3TTW5;Q3UR91;Q80U58;Q80U58-2;Q80U58-3;Q80U78;Q80U78-2;Q80U78-3	ENSMUSG00000028580;ENSMUSG00000020594	Pum1;Pum2	2
E9Q731;E9QAP4;Q61475;Q61476	ENSMUSG00000026401;ENSMUSG00000026399	Cd55b;Cd55	2
E9Q731;Q61475	ENSMUSG00000026401;ENSMUSG00000026399	Cd55b;Cd55	2
E9Q8L9;G3UW57;G3XA57;G3XA57-2;Q9D620	ENSMUSG00000031488;ENSMUSG00000040022	Rab11fip1;Rab11fip2	2
E9Q947;F6XSA1;F7BIN0;G3UW35;P60954-2;Q3TZG8;Q3UH85;Q6DIB4	ENSMUSG00000041923;ENSMUSG00000061411	Nol4;Nol4l	2
E9QAP1;G3X941;Q8BHM7	ENSMUSG00000045757;ENSMUSG00000030823;ENSMUSG00000054381	Zfp764;9130019O22Rik;Zfp747	3
E9QN41;Q8C079;Q8C079-3;Q8C079-4;Q8C9H6;Q8C9H6-3;Q8C9H6-4	ENSMUSG00000039629;ENSMUSG00000014601	Strip2;Strip1	2
E9QP36;Q8C886;Q8C886-3	ENSMUSG00000078485;ENSMUSG00002076083	Plekhn1;Klhl17	2
F2Z3Z8;F2Z410;G3UZK1	ENSMUSG00000070972;ENSMUSG00000092345	Dnajc25;Gm20503	2
F2Z4B3;G3UYI1;O35207	ENSMUSG00000029394;ENSMUSG00000024856	Cdk2ap1;Cdk2ap2	2
F2Z4B3;G3UYI1;O35207;Q9CPY4	ENSMUSG00000029394;ENSMUSG00000024856	Cdk2ap1;Cdk2ap2	2
F2Z4B3;O35207;Q9CPY4	ENSMUSG00000029394;ENSMUSG00000024856	Cdk2ap1;Cdk2ap2	2
F6Q325;Q9CZA6;Q9CZA6-2;Q9CZA6-3;Q9CZA6-4;Q9ERR1;Q9ERR1-2	ENSMUSG00000022678;ENSMUSG00000018736	Nde1;Ndel1	2
F6V0H0;G3UZB0;Q99L02	ENSMUSG00000092534;ENSMUSG00000107068	Pagr1b;Pagr1a	2
F6W0B3;P02830;P09024;P09079;P09092;P09632;P09633;P20615;P28357;S4R2U5	ENSMUSG00000056648;ENSMUSG00000038236;ENSMUSG00000038721;ENSMUSG00000038700;ENSMUSG00000043219;ENSMUSG00000036139;ENSMUSG00000020875;ENSMUSG00000043342	Hoxb8;Hoxa7;Hoxb7;Hoxb5;Hoxa6;Hoxc9;Hoxb9;Hoxd9	8
F6XX07;Q61190;Q8VHM7	ENSMUSG00000093701;ENSMUSG00000022969	Gm21970;Il10rb	2
F6Y6L6;F8WIR1;P18242	ENSMUSG00000110040;ENSMUSG00000007891	Gm49369;Ctsd	2
F6YJB6;Q8R4X3;V9GXJ1	ENSMUSG00000098950;ENSMUSG00000089824	Gm28036;Rbm12	2
F6ZRC5;F7C2Y9;Q8VDM1	ENSMUSG00000090077;ENSMUSG00000027582	Lime1;Zgpat	2
F7A4U8;Q3TYE1;Q3USK2;Q9DC28	ENSMUSG00000025162;ENSMUSG00000022433	Csnk1d;Csnk1e	2
F7A4U8;Q3TYE1;Q3USK2;Q9DC28;Q9DC28-2	ENSMUSG00000025162;ENSMUSG00000022433	Csnk1d;Csnk1e	2
F7AEX1;Q3UYH7;Q7TS64;Q8BVT9;Q99MK8	ENSMUSG00000024858;ENSMUSG00000042249	Grk2;Grk3	2
F7BCN0;F7BZY0;G8JL54;Q8K4M5;Q8VI86	ENSMUSG00000098650;ENSMUSG00000051355	Commd1b;Commd1	2
F7BCN0;F7BZY0;Q8K4M5;Q8VI86	ENSMUSG00000098650;ENSMUSG00000051355	Commd1b;Commd1	2
F7CE88;Q149F3	ENSMUSG00000062203;ENSMUSG00000071723	Gspt1;Gspt2	2
F7DDS0;P0DPD9;P0DPD9-2	ENSMUSG00000115293;ENSMUSG00000115219	Gm49333;Eef1akmt4	2
F8WGE3;Q8K442;Q8K449	ENSMUSG00000041828;ENSMUSG00000041797	Abca8a;Abca9	2
F8WI35	ENSMUSG00000060743;ENSMUSG00000016559	H3f3a;H3f3b	2
F8WI35;P68433	ENSMUSG00000060743;ENSMUSG00000016559;ENSMUSG00000101972;ENSMUSG00000069265;ENSMUSG00000101355;ENSMUSG00000099517	H3f3a;H3f3b;H3c11;H3c1;H3c10;H3c8	6
F8WIA3;J3QK34;J3QMA2;P0C8B4	ENSMUSG00000041716;ENSMUSG00000091931;ENSMUSG00000098530	Gm20604;Gon7;Gm28051	3
F8WJ67;P29037;Q6SJ95;Q91YM5;Z4YMT0	ENSMUSG00000014767;ENSMUSG00000061809	Tbp;Tbpl2	2
G3UW78;G3UW81;Q8VCA4;Q99N18;Q9EP75	ENSMUSG00000091586;ENSMUSG00000090700;ENSMUSG00000073424;ENSMUSG00000024292	Cyp4f17;Cyp4f40;Cyp4f15;Cyp4f14	4
G3UW82;P13542	ENSMUSG00000033196;ENSMUSG00000055775	Myh2;Myh8	2
G3UW82;Q5SX40	ENSMUSG00000033196;ENSMUSG00000056328	Myh2;Myh1	2
G3UWI9;G3UWX9;G3UZ60;G3UZA7;Q9Z172;Q9Z172-2	ENSMUSG00000020265;ENSMUSG00000112241	Sumo3;Gm49325	2
G3UWL7;P0C0S6;Q3THW5;Q3UA95;Q8R029	ENSMUSG00000037894;ENSMUSG00000041126	H2az1;H2az2	2
G3UX05;G3UYJ7	ENSMUSG00000001665;ENSMUSG00000092360	Gstt3;Gm20441	2
G3UXD0;Q9QUK9;Q9R0T7	ENSMUSG00000036938;ENSMUSG00000054106	Try5;Try4	2
G3UXG3;G3UY78;Q7TSJ6	ENSMUSG00000114942;ENSMUSG00000021959	Gm49361;Lats2	2
G3UXL2;Q9D7G0	ENSMUSG00000079104;ENSMUSG00000031432	Prps1l3;Prps1	2
G3UYP1;Q6NTA4;Q80X95	ENSMUSG00000041658;ENSMUSG00000070934	Rragb;Rraga	2
G3UZK1;Q9CXP8	ENSMUSG00000092345;ENSMUSG00000038607	Gm20503;Gng10	2
G3UZW7;P61327;Q9CQL1	ENSMUSG00000030188;ENSMUSG00000028609	Magohb;Magoh	2
G3X8T9;Q03734;Q91WP6	ENSMUSG00000021091;ENSMUSG00000079012	Serpina3n;Serpina3m	2
G3X9G9;H3BJI7;Q5I0W6;Q76I24;Q76I26	ENSMUSG00000058057;ENSMUSG00000093789;ENSMUSG00000056487	Mettl7a3;Methig1;Mettl7a2	3
G3X9I4;O08583;O08583-2;Q9JJW6;Q9JJW6-2	ENSMUSG00000060244;ENSMUSG00000025134	Alyref2;Alyref	2
G3X9V0;P97372	ENSMUSG00000079197;ENSMUSG00000078153	Psme2;Psme2b	2
G3XA48;H3BKD7;H3BLF8;H3BLP1;P58044	ENSMUSG00000058258	Idi1;Idi1-ps1	2
G3XA48;H3BLF8;P58044	ENSMUSG00000058258	Idi1;Idi1-ps1	2
G3XA48;P58044	ENSMUSG00000058258	Idi1;Idi1-ps1	2
G5E811;Q7TNC8;Q91XP5	ENSMUSG00000038257;ENSMUSG00000018589	Glra3;Glra2	2
G5E823;Q61035;Q99KK9	ENSMUSG00000019143;ENSMUSG00000001380	Hars2;Hars	2
H3BIW7;Q9D2X8	ENSMUSG00000022362;ENSMUSG00000101892	Gm29394;9130401M01Rik	2
H3BJN7;Q9DBB5	ENSMUSG00000030068;ENSMUSG00000093661	Gm20696;Eif4e3	2
H3BJZ9;H3BKA1;H3BKL5;Q8VCH0;Q921H8	ENSMUSG00000036138;ENSMUSG00000010651	Acaa1a;Acaa1b	2
H3BJZ9;H3BKL5;Q8VCH0;Q921H8	ENSMUSG00000036138;ENSMUSG00000010651	Acaa1a;Acaa1b	2
H3BKJ1;Q8JZN7	ENSMUSG00000093593;ENSMUSG00000025733	Gm20683;Rhot2	2
H3BKL5;Q8VCH0;Q921H8	ENSMUSG00000036138;ENSMUSG00000010651	Acaa1a;Acaa1b	2
H3BL89;Q66JW3;Q80W03;Q8BU11	ENSMUSG00000043668;ENSMUSG00000041272;ENSMUSG00000016831	Tox3;Tox;Tox4	3
H3BL89;Q80W03;Q8BU11	ENSMUSG00000043668;ENSMUSG00000016831	Tox3;Tox4	2
H6TMF5;P05132;P05132-2;P68181;P68181-2;P68181-3;P68181-4	ENSMUSG00000005034;ENSMUSG00000005469	Prkacb;Prkaca	2
I3ITR1;Q9D924	ENSMUSG00000078139;ENSMUSG00000044792	AK157302;Isca1	2
I7HJI5;Q9D6A7;Q9DAV6	ENSMUSG00000021404;ENSMUSG00000021403	Serpinb9c;Serpinb9b	2
I7HLV2;P86048;Q6ZWV3	ENSMUSG00000008682;ENSMUSG00000060499	Rpl10;Rpl10l	2
J3QMX2;Q3TKD0;Q8BFY9;Q8BFY9-2;Q99LG2	ENSMUSG00000009470;ENSMUSG00000031691	Tnpo1;Tnpo2	2
J3QNT6;Q8BMJ3	ENSMUSG00000093847;ENSMUSG00000067194	Eif1ad15;Eif1ax	2
J3QQ10;Q9D011	ENSMUSG00000094649;ENSMUSG00000012429	Gm7102;Mplkip	2
K9J7B2;Q64435	ENSMUSG00000090145;ENSMUSG00000054545	Ugt1a6b;Ugt1a6a	2
L7N451;Q80SU7	ENSMUSG00000045868;ENSMUSG00000078606	Gvin1;Gvin2	2
O08553;P97427;Q6P1J1;Q71H75	ENSMUSG00000022048;ENSMUSG00000029121	Dpysl2;Crmp1	2
O08583;O08583-2;Q9JJW6-2	ENSMUSG00000025134;ENSMUSG00000060244	Alyref;Alyref2	2
O08602;O08603		Raet1a;Raet1b	2
O08631;O09048;Q925H3	ENSMUSG00000068075;ENSMUSG00000058172;ENSMUSG00000068074;ENSMUSG00000068073;ENSMUSG00000062400	Gm10229;Krtap6-1;Gm10228;1110025L11Rik;Krtap6-5	5
O08791;O08791-2;Q07802;Q07802-2;Q5SWK4;Q5SWK8;Q6NXL3	ENSMUSG00000010476;ENSMUSG00000057098	Ebf3;Ebf1	2
O09100;P23772	ENSMUSG00000015053;ENSMUSG00000015619	Gata2;Gata3	2
O35066;Q61771	ENSMUSG00000020668;ENSMUSG00000027475	Kif3c;Kif3b	2
O35963;P97950	ENSMUSG00000027739;ENSMUSG00000031104	Rab33b;Rab33a	2
O54743;O88470;Q61080	ENSMUSG00000038402;ENSMUSG00000050397;ENSMUSG00000042812	Foxf2;Foxl2;Foxf1	3
O54790;O54791	ENSMUSG00000051510;ENSMUSG00000042622	Mafg;Maff	2
O54790;O54791;Q61827	ENSMUSG00000051510;ENSMUSG00000042622;ENSMUSG00000018143	Mafg;Maff;Mafk	3
O55137;Q32Q92;Q32Q92-2;Q8BWN8;Q9QYR9	ENSMUSG00000072949;ENSMUSG00000043487;ENSMUSG00000052392;ENSMUSG00000021226	Acot1;Acot6;Acot4;Acot2	4
O55137;Q9QYR9	ENSMUSG00000072949;ENSMUSG00000021226	Acot1;Acot2	2
O70172;Q80XI4	ENSMUSG00000026737;ENSMUSG00000018547	Pip4k2a;Pip4k2b	2
O70299;Q8BPP1	ENSMUSG00000056947;ENSMUSG00000057777	Mab21l1;Mab21l2	2
O70555;O70559	ENSMUSG00000042212;ENSMUSG00000046259	Sprr2d;Sprr2h	2
O88207;O88207-2;Q61245;Q61245-2	ENSMUSG00000026837;ENSMUSG00000027966	Col5a1;Col11a1	2
O88508;O88508-2;O88509;O88509-2;O88509-3;O88509-4;Q3KR45	ENSMUSG00000020661;ENSMUSG00000027478	Dnmt3a;Dnmt3b	2
O88689-3	ENSMUSG00000103458;ENSMUSG00000104252	Gm37013;Pcdha4	2
O88689;Q91Y12;Q91Y13;Q91Y14;Q91Y15;Q91Y16;Q91Y17;Q91Y18;Q91Y19	ENSMUSG00000103458;ENSMUSG00000104252;ENSMUSG00000103800;ENSMUSG00000104318;ENSMUSG00000103707;ENSMUSG00000103092;ENSMUSG00000102312;ENSMUSG00000104148;ENSMUSG00000103310;ENSMUSG00000102206	Gm37013;Pcdha4;Pcdha8;Pcdha7;Pcdha6;Pcdha5;Pcdha3;Pcdha2;Pcdha12;Pcdha11	10
O88951;Q3TUM0	ENSMUSG00000003872;ENSMUSG00000019906	Lin7b;Lin7a	2
O88992;Q8CFR0;Q9ESN4	ENSMUSG00000045532;ENSMUSG00000036907;ENSMUSG00000049630	C1ql1;C1ql2;C1ql3	3
P00688	ENSMUSG00000093931;ENSMUSG00000096770;ENSMUSG00000096569;ENSMUSG00000074268	Amy2a3;Amy2a4;Amy2a2;Amy2a5	4
P00796;P06281	ENSMUSG00000070645	Ren2;Ren1	2
P01753;P01754;P06328	ENSMUSG00000096767;ENSMUSG00000096074	Ighv1-62-3;Ighv1-72	2
P01754;P06328	ENSMUSG00000096767;ENSMUSG00000096074	Ighv1-62-3;Ighv1-72	2
P01942;Q91VB8	ENSMUSG00000069919;ENSMUSG00000069917	Hba-a1;Hba-a2	2
P02088	ENSMUSG00000052305;ENSMUSG00000073940	Hbb-bs;Hbb-bt;Hbb-b1	3
P02088;P02089	ENSMUSG00000052305;ENSMUSG00000073940	Hbb-bs;Hbb-bt;Hbb-b1;Hbb-b2	4
P04095;P04095-2;P04768	ENSMUSG00000079092;ENSMUSG00000056457	Prl2c2;Prl2c3;Prl2c4	3
P04939;Q3KQQ2;Q80YX8	ENSMUSG00000066154;ENSMUSG00000066153	Mup3;Mup21	2
P05214	ENSMUSG00000067702;ENSMUSG00000067338	Tuba3a;Tuba3b	2
P05214;P68369	ENSMUSG00000067702;ENSMUSG00000067338;ENSMUSG00000072235	Tuba3a;Tuba3b;Tuba1a	3
P05214;P68369;P68373	ENSMUSG00000067702;ENSMUSG00000067338;ENSMUSG00000072235;ENSMUSG00000043091	Tuba3a;Tuba3b;Tuba1a;Tuba1c	4
P05531;Q8BS74;Q9D6C3	ENSMUSG00000054626;ENSMUSG00000031125	Xlr;3830403N18Rik	2
P06795;P21447	ENSMUSG00000028970;ENSMUSG00000040584	Abcb1b;Abcb1a	2
P07361;Q60590	ENSMUSG00000061540;ENSMUSG00000039196	Orm2;Orm1	2
P08905;P17897	ENSMUSG00000069516;ENSMUSG00000069515	Lyz2;Lyz1	2
P09041;P09411;S4R2M7	ENSMUSG00000031233;ENSMUSG00000062070	Pgk2;Pgk1	2
P0C027;P0C028	ENSMUSG00000073293;ENSMUSG00000073295	Nudt10;Nudt11	2
P0C027;P0C028;Q8R2U6	ENSMUSG00000073293;ENSMUSG00000073295;ENSMUSG00000020029	Nudt10;Nudt11;Nudt4	3
P0C0S6;Q3THW5;Q3UA95	ENSMUSG00000037894;ENSMUSG00000041126	H2az1;H2az2	2
P0C0S6;Q3THW5;Q3UA95;Q8R029	ENSMUSG00000037894;ENSMUSG00000041126	H2az1;H2az2	2
P0C0S6;Q3THW5;Q8R029	ENSMUSG00000037894;ENSMUSG00000041126	H2az1;H2az2	2
P0CAX8;Q66JX5;Q66JX5-2	ENSMUSG00000052031;ENSMUSG00000069135	Tagap1;Cep43	2
P0CL69;Q7TMA2	ENSMUSG00000085795;ENSMUSG00000039081	Zfp703;Zfp503	2
P0DP26;P0DP27;P0DP28	ENSMUSG00000019370;ENSMUSG00000036438;ENSMUSG00000001175	Calm3;Calm2;Calm1	3
P0DPE0	ENSMUSG00000115293;ENSMUSG00000115219	Gm49333;Eef1akmt4	2
P10755;Q6P9Y7;Q6P9Y7-2;S4R1G9	ENSMUSG00000053985;ENSMUSG00000098022	Zfp14;Zfp82	2
P10853;P10854;P70696;Q64475;Q64478;Q64524;Q64525;Q6ZWY9;Q8CBB6;Q8CGP0;Q8CGP1;Q8CGP2;Q8CGP2-2;Q9D2U9	ENSMUSG00000069300;ENSMUSG00000069303;ENSMUSG00000095217;ENSMUSG00000069268;ENSMUSG00000069307;ENSMUSG00000094338;ENSMUSG00000114279;ENSMUSG00000050799;ENSMUSG00000075031;ENSMUSG00000114456;ENSMUSG00000068854;ENSMUSG00000105827;ENSMUSG00000058385;ENSMUSG00000047246;ENSMUSG00000018102;ENSMUSG00000062727;ENSMUSG00000069308;ENSMUSG00000056895	H2bc11;H2bc24;H2bc15;H2bc7;H2bc23;H2bc13;H2bc14;H2bc1;H2bc3;H2bc9;H2bc21;H2bc18;H2bc8;H2bc6;H2bc4;H2bc12;H2bc22;H2bu2	18
P10853;P10854;P70696;Q64475;Q64478;Q64525;Q6ZWY9;Q8CBB6;Q8CGP1;Q8CGP2;Q8CGP2-2	ENSMUSG00000069300;ENSMUSG00000069303;ENSMUSG00000095217;ENSMUSG00000069268;ENSMUSG00000069307;ENSMUSG00000094338;ENSMUSG00000114279;ENSMUSG00000050799;ENSMUSG00000075031;ENSMUSG00000114456;ENSMUSG00000105827;ENSMUSG00000058385;ENSMUSG00000047246;ENSMUSG00000018102;ENSMUSG00000062727;ENSMUSG00000069308	H2bc11;H2bc24;H2bc15;H2bc7;H2bc23;H2bc13;H2bc14;H2bc1;H2bc3;H2bc9;H2bc18;H2bc8;H2bc6;H2bc4;H2bc12;H2bc22	16
P10853;P10854;Q64475;Q64478;Q64524;Q64525;Q6ZWY9;Q8CBB6;Q8CGP0;Q8CGP1;Q8CGP2;Q8CGP2-2;Q9D2U9	ENSMUSG00000069300;ENSMUSG00000069303;ENSMUSG00000095217;ENSMUSG00000069268;ENSMUSG00000069307;ENSMUSG00000094338;ENSMUSG00000114279;ENSMUSG00000075031;ENSMUSG00000114456;ENSMUSG00000068854;ENSMUSG00000105827;ENSMUSG00000058385;ENSMUSG00000047246;ENSMUSG00000018102;ENSMUSG00000062727;ENSMUSG00000069308;ENSMUSG00000056895	H2bc11;H2bc24;H2bc15;H2bc7;H2bc23;H2bc13;H2bc14;H2bc3;H2bc9;H2bc21;H2bc18;H2bc8;H2bc6;H2bc4;H2bc12;H2bc22;H2bu2	17
P10853;P10854;Q64475;Q64478;Q64525;Q6ZWY9;Q8CBB6;Q8CGP1;Q8CGP2;Q8CGP2-2	ENSMUSG00000069300;ENSMUSG00000069303;ENSMUSG00000095217;ENSMUSG00000069268;ENSMUSG00000069307;ENSMUSG00000094338;ENSMUSG00000114279;ENSMUSG00000075031;ENSMUSG00000114456;ENSMUSG00000105827;ENSMUSG00000058385;ENSMUSG00000047246;ENSMUSG00000018102;ENSMUSG00000062727;ENSMUSG00000069308	H2bc11;H2bc24;H2bc15;H2bc7;H2bc23;H2bc13;H2bc14;H2bc3;H2bc9;H2bc18;H2bc8;H2bc6;H2bc4;H2bc12;H2bc22	15
P10853;P70696;Q64475;Q64478;Q6ZWY9;Q8CBB6;Q8CGP1;Q8CGP2;Q8CGP2-2	ENSMUSG00000069300;ENSMUSG00000069303;ENSMUSG00000095217;ENSMUSG00000069268;ENSMUSG00000069307;ENSMUSG00000094338;ENSMUSG00000050799;ENSMUSG00000075031;ENSMUSG00000114456;ENSMUSG00000058385;ENSMUSG00000047246;ENSMUSG00000018102;ENSMUSG00000062727;ENSMUSG00000069308	H2bc11;H2bc24;H2bc15;H2bc7;H2bc23;H2bc13;H2bc1;H2bc3;H2bc9;H2bc8;H2bc6;H2bc4;H2bc12;H2bc22	14
P10853;P70696;Q64475;Q8CBB6;Q8CGP1;Q8CGP2;Q8CGP2-2	ENSMUSG00000069300;ENSMUSG00000069303;ENSMUSG00000095217;ENSMUSG00000069268;ENSMUSG00000069307;ENSMUSG00000094338;ENSMUSG00000050799;ENSMUSG00000075031;ENSMUSG00000062727;ENSMUSG00000069308	H2bc11;H2bc24;H2bc15;H2bc7;H2bc23;H2bc13;H2bc1;H2bc3;H2bc12;H2bc22	10
P10853;P70696;Q64475;Q8CBB6;Q8CGP2;Q8CGP2-2	ENSMUSG00000069300;ENSMUSG00000069303;ENSMUSG00000095217;ENSMUSG00000069268;ENSMUSG00000069307;ENSMUSG00000094338;ENSMUSG00000050799;ENSMUSG00000075031;ENSMUSG00000069308	H2bc11;H2bc24;H2bc15;H2bc7;H2bc23;H2bc13;H2bc1;H2bc3;H2bc22	9
P10853;P70696;Q8CBB6;Q8CGP1;Q8CGP2;Q8CGP2-2	ENSMUSG00000069300;ENSMUSG00000069303;ENSMUSG00000095217;ENSMUSG00000069268;ENSMUSG00000069307;ENSMUSG00000094338;ENSMUSG00000050799;ENSMUSG00000062727;ENSMUSG00000069308	H2bc11;H2bc24;H2bc15;H2bc7;H2bc23;H2bc13;H2bc1;H2bc12;H2bc22	9
P10853;Q64478;Q6ZWY9;Q8CBB6	ENSMUSG00000069300;ENSMUSG00000069303;ENSMUSG00000095217;ENSMUSG00000069268;ENSMUSG00000069307;ENSMUSG00000094338;ENSMUSG00000114456;ENSMUSG00000058385;ENSMUSG00000047246;ENSMUSG00000018102	H2bc11;H2bc24;H2bc15;H2bc7;H2bc23;H2bc13;H2bc9;H2bc8;H2bc6;H2bc4	10
P10854;Q64478;Q64525;Q6ZWY9	ENSMUSG00000114279;ENSMUSG00000114456;ENSMUSG00000105827;ENSMUSG00000058385;ENSMUSG00000047246;ENSMUSG00000018102	H2bc14;H2bc9;H2bc18;H2bc8;H2bc6;H2bc4	6
P10854;Q64478;Q6ZWY9	ENSMUSG00000114279;ENSMUSG00000114456;ENSMUSG00000058385;ENSMUSG00000047246;ENSMUSG00000018102	H2bc14;H2bc9;H2bc8;H2bc6;H2bc4	5
P11928;Q05BJ7;Q8K469	ENSMUSG00000052776;ENSMUSG00000066861	Oas1a;Oas1g	2
P11928;Q8K469	ENSMUSG00000052776;ENSMUSG00000066861	Oas1a;Oas1g	2
P11928;Q8K469;Q8VI95;Q924S2	ENSMUSG00000052776;ENSMUSG00000066861;ENSMUSG00000032623;ENSMUSG00000001166	Oas1a;Oas1g;Oas1d;Oas1c	4
P13745;P30115;Q6P8Q0	ENSMUSG00000074183;ENSMUSG00000025934;ENSMUSG00000111709	Gsta1;Gsta3;Gm3776	3
P13745;Q6P8Q0	ENSMUSG00000074183;ENSMUSG00000111709	Gsta1;Gm3776	2
P14576	ENSMUSG00000112449;ENSMUSG00000073079	Srp54b;Srp54a	2
P15392;P20852;Q91X75	ENSMUSG00000074254;ENSMUSG00000005547	Cyp2a4;Cyp2a5	2
P15864;P43277	ENSMUSG00000036181;ENSMUSG00000052565	H1f2;H1f3	2
P16381;Q62095;Q62167	ENSMUSG00000039224;ENSMUSG00000069045;ENSMUSG00000000787	D1Pas1;Ddx3y;Ddx3x	3
P16381;Q62167	ENSMUSG00000039224;ENSMUSG00000000787	D1Pas1;Ddx3x	2
P16388;P16390	ENSMUSG00000047976;ENSMUSG00000047959	Kcna1;Kcna3	2
P16388;P16390;P63141;Q61423;Q61923	ENSMUSG00000047976;ENSMUSG00000047959;ENSMUSG00000040724;ENSMUSG00000042604;ENSMUSG00000038077	Kcna1;Kcna3;Kcna2;Kcna4;Kcna6	5
P16390;P63141	ENSMUSG00000047959;ENSMUSG00000040724	Kcna3;Kcna2	2
P17095;Q3TE85	ENSMUSG00000046711;ENSMUSG00000078249	Hmga1;Hmga1b	2
P17156;P63017;Q504P4	ENSMUSG00000059970;ENSMUSG00000015656	Hspa2;Hspa8	2
P17182	ENSMUSG00000063524;ENSMUSG00000059040	Eno1;Eno1b	2
P17182;Q6PHC1	ENSMUSG00000063524;ENSMUSG00000059040	Eno1;Eno1b	2
P17879;Q61696	ENSMUSG00000090877;ENSMUSG00000091971	Hspa1b;Hspa1a	2
P20444;P68404;P68404-2;Q3TQ39;Q4VA93	ENSMUSG00000050965;ENSMUSG00000052889	Prkca;Prkcb	2
P21126	ENSMUSG00000015290	Ubl4a;Gm44504	2
P21300;S4R2G9	ENSMUSG00000052131;ENSMUSG00000061758	Akr1b7;Akr1b10	2
P21765;Q91WR8	ENSMUSG00000004344;ENSMUSG00000004341	Gpx5;Gpx6	2
P23949;P23950	ENSMUSG00000045817;ENSMUSG00000021127	Zfp36l2;Zfp36l1	2
P27048;P63163	ENSMUSG00000027404;ENSMUSG00000102252	Snrpb;Snrpn	2
P27661;Q64522	ENSMUSG00000049932;ENSMUSG00000063689	H2ax;H2ac21	2
P28665;P28666	ENSMUSG00000059908;ENSMUSG00000030131	Mug1;Mug2	2
P29341;Q9D4E6	ENSMUSG00000022283;ENSMUSG00000046173	Pabpc1;Pabpc6	2
P31809;P31809-2;P31809-3;Q3LFS5;Q3LFS7;Q3LFS9;Q925P2;Q925P3	ENSMUSG00000074272;ENSMUSG00000054385	Ceacam1;Ceacam2	2
P35174;P35174-2;Q8BWM3	ENSMUSG00000022902;ENSMUSG00000059657	Stfa2;Stfa2l1	2
P35174;Q8BWM3	ENSMUSG00000022902;ENSMUSG00000059657	Stfa2;Stfa2l1	2
P43135;Q32NY6;Q60632	ENSMUSG00000030551;ENSMUSG00000069171	Nr2f2;Nr2f1	2
P50247	ENSMUSG00000027597;ENSMUSG00000048087	Ahcy;Ahcyl	2
P53994;P59279;Q3TEG7	ENSMUSG00000047187;ENSMUSG00000022159	Rab2a;Rab2b	2
P53994;Q3TEG7	ENSMUSG00000047187;ENSMUSG00000022159	Rab2a;Rab2b	2
P54763;P54763-2;P54763-4;Q8CBF3	ENSMUSG00000028664;ENSMUSG00000032537	Ephb2;Ephb1	2
P55258;Q9DD03	ENSMUSG00000003037;ENSMUSG00000027935	Rab8a;Rab13	2
P56384;Q9CR84	ENSMUSG00000018770;ENSMUSG00000006057	Atp5g3;Atp5g1	2
P58044	ENSMUSG00000058258	Idi1;Idi1-ps1	2
P58321;Q9JKB1	ENSMUSG00000035337;ENSMUSG00000022111	Uchl4;Uchl3	2
P60764;P63001;Q05144;Q3TLP8	ENSMUSG00000018012;ENSMUSG00000001847;ENSMUSG00000033220	Rac3;Rac1;Rac2	3
P60764;P63001;Q3TLP8	ENSMUSG00000018012;ENSMUSG00000001847	Rac3;Rac1	2
P61025;Q3UNC9	ENSMUSG00000028044;ENSMUSG00000062687	Cks1b;Cks1brt	2
P61027;Q9DD03	ENSMUSG00000020671;ENSMUSG00000027935	Rab10;Rab13	2
P61205;P84078	ENSMUSG00000051853;ENSMUSG00000048076	Arf3;Arf1	2
P61205;P84078;Q8BSL7	ENSMUSG00000051853;ENSMUSG00000048076;ENSMUSG00000062421	Arf3;Arf1;Arf2	3
P61226;Q80ZJ1-2;Q8BU31	ENSMUSG00000036894;ENSMUSG00000051615;ENSMUSG00000050029	Rap2b;Rap2a;Rap2c	3
P61226;Q80ZJ1;Q80ZJ1-2;Q8BU31	ENSMUSG00000036894;ENSMUSG00000051615;ENSMUSG00000050029	Rap2b;Rap2a;Rap2c	3
P61327;Q9CQL1	ENSMUSG00000028609;ENSMUSG00000030188	Magoh;Magohb	2
P61358	ENSMUSG00000063316	Rpl27;LOC108167922	2
P61620;Q9CYJ6;Q9JLR1	ENSMUSG00000030082;ENSMUSG00000025816	Sec61a1;Sec61a2	2
P62702;V9GWY0	ENSMUSG00000031320;ENSMUSG00000098559	Rps4x;Gm15013	2
P62715;P63330	ENSMUSG00000009630;ENSMUSG00000020349	Ppp2cb;Ppp2ca	2
P62737;P63268;P68033	ENSMUSG00000035783;ENSMUSG00000059430;ENSMUSG00000068614	Acta2;Actg2;Actc1	3
P62754	ENSMUSG00000028495	Rps6;Rps6-ps4	2
P62806	ENSMUSG00000091405;ENSMUSG00000060639;ENSMUSG00000069305;ENSMUSG00000060093;ENSMUSG00000096010;ENSMUSG00000060981;ENSMUSG00000069306;ENSMUSG00000069266;ENSMUSG00000060678;ENSMUSG00000061482	H4c14;H4c9;H4c18;H4c1;H4f16;H4c8;H4c17;H4c2;H4c3;H4c4	10
P62827;Q14AA6	ENSMUSG00000029430;ENSMUSG00000028287	Ran;1700009N14Rik	2
P62827;Q14AA6;Q61820	ENSMUSG00000029430;ENSMUSG00000028287;ENSMUSG00000083649	Ran;1700009N14Rik;Rasl2-9	3
P63001;Q05144;Q3TLP8	ENSMUSG00000001847;ENSMUSG00000033220	Rac1;Rac2	2
P63040;P84086	ENSMUSG00000033615;ENSMUSG00000025867	Cplx1;Cplx2	2
P63168;Q80ZS7	ENSMUSG00000009013;ENSMUSG00000064063	Dynll1;BC048507	2
P63271;Q9Z199	ENSMUSG00000020485	Supt4a;Supt4b	2
P68369;P68373	ENSMUSG00000072235;ENSMUSG00000043091	Tuba1a;Tuba1c	2
P68372;Q922F4;Q9D6F9	ENSMUSG00000036752;ENSMUSG00000001473;ENSMUSG00000062591	Tubb4b;Tubb6;Tubb4a	3
P68372;Q9D6F9	ENSMUSG00000036752;ENSMUSG00000062591	Tubb4b;Tubb4a	2
P68373;Q9JJZ2	ENSMUSG00000043091;ENSMUSG00000030137	Tuba1c;Tuba8	2
P68433	ENSMUSG00000101972;ENSMUSG00000069265;ENSMUSG00000101355;ENSMUSG00000099517	H3c11;H3c1;H3c10;H3c8	4
P70225;Q64385	ENSMUSG00000078735;ENSMUSG00000073876;ENSMUSG00000073889	Il11ra2;Gm13305;Il11ra1	3
P70340;P97454;Q8C3Y6	ENSMUSG00000031681;ENSMUSG00000021540	Smad1;Smad5	2
P70696;Q64525	ENSMUSG00000050799;ENSMUSG00000105827	H2bc1;H2bc18	2
P83887;Q8VCK3	ENSMUSG00000035198;ENSMUSG00000045007	Tubg1;Tubg2	2
P86792;P86793	ENSMUSG00000096596;ENSMUSG00000073878;ENSMUSG00000095675;ENSMUSG00000094065	Gm10591;Gm13304;Ccl21b;Ccl21d	4
P97372	ENSMUSG00000079197;ENSMUSG00000078153	Psme2;Psme2b	2
P97425;P97426;Q923L6	ENSMUSG00000072596;ENSMUSG00000072601;ENSMUSG00000090166	Ear2;Ear1;Ear10	3
P97812;Q62226	ENSMUSG00000006538;ENSMUSG00000002633	Ihh;Shh	2
P97861;Q9ERE2	ENSMUSG00000067614;ENSMUSG00000067615	Krt86;Krt81	2
P98083;P98083-2;P98083-3;Q8BMC3	ENSMUSG00000042626;ENSMUSG00000020312	Shc1;Shc2	2
Q02526;Q60821	ENSMUSG00000047003;ENSMUSG00000006215	Zfp41;Zbtb17	2
Q02566;Q91Z83	ENSMUSG00000040752;ENSMUSG00000053093	Myh6;Myh7	2
Q03740;Q9CXV3	ENSMUSG00000070870;ENSMUSG00000025945	Cryge;Crygf	2
Q04890;Q06831;Q7M6Y2	ENSMUSG00000051817;ENSMUSG00000076431;ENSMUSG00000063632	Sox12;Sox4;Sox11	3
Q05020	ENSMUSG00000109350;ENSMUSG00000002992	Apoc2l;Apoc2	2
Q08ED5;Q149K3;Q8BK48	ENSMUSG00000062826;ENSMUSG00000031886	Ces2f;Ces2e	2
Q0V8T8;Q0V8T8-2;Q0V8T9	ENSMUSG00000067028;ENSMUSG00000070695	Cntnap5b;Cntnap5a	2
Q149F3;Q8R050;Q8R050-2	ENSMUSG00000071723;ENSMUSG00000062203	Gspt2;Gspt1	2
Q14B01;Q8R3P8	ENSMUSG00000098134;ENSMUSG00000036537	Rnf113a2;Rnf113a1	2
Q31094;Q31099	ENSMUSG00000079547;ENSMUSG00000037548	H2-DMb1;H2-DMb2	2
Q32M21;Q32M21-2;Q32M21-3;Q9EST1	ENSMUSG00000017211;ENSMUSG00000017204	Gsdma2;Gsdma	2
Q32MW3;Q9R0X4	ENSMUSG00000047565;ENSMUSG00000025287	Acot10;Acot9	2
Q3KNI6;Q8C6P5	ENSMUSG00000026063;ENSMUSG00000042433	Dnaaf6;Dnaaf6b	2
Q3T9E4;Q5SVP4;Q62293	ENSMUSG00000078921;ENSMUSG00000078922	Tgtp2;Tgtp1	2
Q3T9E4;Q62293	ENSMUSG00000078921;ENSMUSG00000078922	Tgtp2;Tgtp1	2
Q3THE2;Q6ZWQ9	ENSMUSG00000034868;ENSMUSG00000024048	Myl12b;Myl12a	2
Q3THE2;Q6ZWQ9;Q9CQ19	ENSMUSG00000034868;ENSMUSG00000024048;ENSMUSG00000067818	Myl12b;Myl12a;Myl9	3
Q3THE2;Q9CQ19	ENSMUSG00000034868;ENSMUSG00000067818	Myl12b;Myl9	2
Q3TQP0;Q9CQY2	ENSMUSG00000074826;ENSMUSG00000038646	Gm10767;Ramac	2
Q3TZR9;Q3US59;Q8R0S1;V9GX99;V9GXN6	ENSMUSG00000099083;ENSMUSG00000052414	Atf7;Gm28047	2
Q3TZR9;Q3US59;Q8R0S1;V9GXN6	ENSMUSG00000099083;ENSMUSG00000052414	Atf7;Gm28047	2
Q3U0A6;Q8BYM1	ENSMUSG00000073063;ENSMUSG00000020295	Hbq1b;Hbq1a	2
Q3UDM0;Q8BPB0;Q921Y0;Q921Y0-2	ENSMUSG00000006262;ENSMUSG00000043131	Mob1b;Mob1a	2
Q3UF75;Q9EPC1;Q9ES46	ENSMUSG00000030770;ENSMUSG00000022438	Parva;Parvb	2
Q3UGC7;Q66JS6	ENSMUSG00000027236;ENSMUSG00000043424	Eif3j1;Eif3j2	2
Q3UNA4;Q3UNA4-2;Q9QZV9	ENSMUSG00000042271;ENSMUSG00000036992	Nxt2;Nxt1	2
Q3UU56;Q8BL74	ENSMUSG00000101678;ENSMUSG00000106864	Gm29609;Gtf3c2	2
Q3UWE6;Q9D5R2	ENSMUSG00000037957;ENSMUSG00000035560	Wdr20;Wdr20rt	2
Q3UX61;Q9CQX6	ENSMUSG00000046000;ENSMUSG00000057130	Naa11;Txnl4a	2
Q3UYH7;Q7TS64;Q8BVT9;Q99MK8	ENSMUSG00000042249;ENSMUSG00000024858	Grk3;Grk2	2
Q3V1F1;Q99N17	ENSMUSG00000062464;ENSMUSG00000048440	Cyp4f37;Cyp4f16	2
Q45VN2;Q8C1N9	ENSMUSG00000094818;ENSMUSG00000095066;ENSMUSG00000096295;ENSMUSG00000094362	Defa32;Defa20;Defa2;Defa33	4
Q4FZG7;Q9WVA2	ENSMUSG00000071229;ENSMUSG00000048007	Timm8a2;Timm8a1	2
Q4KL05;Q62478	ENSMUSG00000073257;ENSMUSG00000095887;ENSMUSG00000094624;ENSMUSG00000073247;ENSMUSG00000073245;ENSMUSG00000095293;ENSMUSG00000094759;ENSMUSG00000095546;ENSMUSG00000073255;ENSMUSG00000096457	Gm10488;Gm10096;Gm4836;Gm10486;Gm14819;Gm10058;Gm10487;Gm10230;Gm14632;Gm10147	10
Q52KH6	ENSMUSG00000067771;ENSMUSG00000071745	Pwwp4a;Pwwp4b	2
Q52KQ3;Q91XX4;Q91XX5;Q91XX6;Q91XX7;Q91XX8;Q91XZ8	ENSMUSG00000073591;ENSMUSG00000103088;ENSMUSG00000103749;ENSMUSG00000103585;ENSMUSG00000102748;ENSMUSG00000103037	Pcdhb22;Pcdhgb6;Pcdhgb5;Pcdhgb4;Pcdhgb2;Pcdhgb1	6
Q5M8Q2	ENSMUSG00000099443;ENSMUSG00000095655;ENSMUSG00000100626;ENSMUSG00000095662;ENSMUSG00000095445;ENSMUSG00000096097;ENSMUSG00000094904	H2al1h;H2al1f;H2al1a;H2al1g;H2al1i;H2al1c;H2al1d	7
Q5NCB2;Q5SVP0	ENSMUSG00000048852;ENSMUSG00000069893	Gm12185;9930111J21Rik1	2
Q5SX39;Q5SX40	ENSMUSG00000057003;ENSMUSG00000056328	Myh4;Myh1	2
Q5SZT7;Q9D0F4	ENSMUSG00000059395;ENSMUSG00000016409	Nkapl;Nkap	2
Q61090;Q9JIP6	ENSMUSG00000041075;ENSMUSG00000050288	Fzd7;Fzd2	2
Q61495;Q7TSF0;Q7TSF0-2;Q7TSF1	ENSMUSG00000069441;ENSMUSG00000034774;ENSMUSG00000061928	Dsg1a;Dsg1c;Dsg1b	3
Q61495;Q7TSF0;Q7TSF1	ENSMUSG00000069441;ENSMUSG00000034774;ENSMUSG00000061928	Dsg1a;Dsg1c;Dsg1b	3
Q61495;Q7TSF1	ENSMUSG00000069441;ENSMUSG00000061928	Dsg1a;Dsg1b	2
Q61655;Q8BZY3	ENSMUSG00000015023;ENSMUSG00000033658	Ddx19a;Ddx19b	2
Q61655;Q8BZY3;Q8R3C7	ENSMUSG00000015023;ENSMUSG00000033658	Ddx19a;Ddx19b	2
Q62148;Q9JHW9	ENSMUSG00000013584;ENSMUSG00000015134	Aldh1a2;Aldh1a3	2
Q62190;Q922K9	ENSMUSG00000032584;ENSMUSG00000019779	Mst1r;Frk	2
Q62313;Q62314	ENSMUSG00000056429	Tgoln1;Tgoln2	2
Q64433;Q9JI95	ENSMUSG00000073676;ENSMUSG00000117621	Hspe1;Hspe1-rs1	2
Q64478;Q6ZWY9	ENSMUSG00000114456;ENSMUSG00000058385;ENSMUSG00000047246;ENSMUSG00000018102	H2bc9;H2bc8;H2bc6;H2bc4	4
Q64523;Q6GSS7	ENSMUSG00000068855;ENSMUSG00000063954;ENSMUSG00000064220	H2ac20;H2ac19;H2ac18	3
Q64524;Q8CGP0;Q9D2U9	ENSMUSG00000068854;ENSMUSG00000056895	H2bc21;H2bu2	2
Q66JV4;Q66JV4-2;Q80YR9	ENSMUSG00000052137;ENSMUSG00000046667	Rbm12b2;Rbm12b1	2
Q6DD96;Q91XX9;Q91XY2;Q91XY4;Q91XY6;Q91XZ0	ENSMUSG00000103472;ENSMUSG00000102440;ENSMUSG00000103793;ENSMUSG00000103677;ENSMUSG00000103332;ENSMUSG00000103144	Pcdhga7;Pcdhga9;Pcdhga6;Pcdhga4;Pcdhga2;Pcdhga1	6
Q6DID3;Q7TSH6;Q7TSH6-2;Q7TSH6-3	ENSMUSG00000046201;ENSMUSG00000022983	Scaf8;Scaf4	2
Q6NTA4;Q80X95	ENSMUSG00000041658;ENSMUSG00000070934	Rragb;Rraga	2
Q6NXZ5;Q80ZU0;Q8BLF9;Q9D4P0	ENSMUSG00000017418;ENSMUSG00000036093	Arl5b;Arl5a	2
Q6P1E1;Q6P1E1-2;Q8CIE2;Q8CIE2-2;Q8CIE2-3	ENSMUSG00000007817;ENSMUSG00000041164	Zmiz1;Zmiz2	2
Q6P1F6;Q925E7;Q9CWU3	ENSMUSG00000022052;ENSMUSG00000041769	Ppp2r2a;Ppp2r2d	2
Q6PGH0;Q91WB7	ENSMUSG00000044949;ENSMUSG00000025171	Ubtd2;Ubtd1	2
Q6PHC1	ENSMUSG00000063524;ENSMUSG00000059040	Eno1;Eno1b	2
Q6Q2Z6;Q9QYR7;Q9QYR7-2	ENSMUSG00000042540;ENSMUSG00000021228	Acot5;Acot3	2
Q6ZPT1;Q80TF4;Q80TF4-2;Q80TF4-3;Q80TF4-4;Q80TF4-5	ENSMUSG00000070923;ENSMUSG00000036782	Klhl9;Klhl13	2
Q76M72;Q76M72-2;Q8BWG6	ENSMUSG00000067656;ENSMUSG00000075044	Slc22a27;Slc22a29	2
Q7TNK4;Q9CY99	ENSMUSG00000024276;ENSMUSG00000050846	Zfp397;Zfp623	2
Q7TNU6;Q8C689	ENSMUSG00000054967;ENSMUSG00000037007	Zfp647;Zfp113	2
Q80X68;Q9CZU6	ENSMUSG00000046934;ENSMUSG00000005683	Csl;Cs	2
Q8BFZ9;Q91X78	ENSMUSG00000031483;ENSMUSG00000025198	Erlin2;Erlin1	2
Q8BI73;Q8BJ90	ENSMUSG00000007216;ENSMUSG00000054716	Zfp775;Zfp771	2
Q8BML3;Q9D8C3-2	ENSMUSG00000031286;ENSMUSG00000041718	Glt28d2;Alg13	2
Q8BR63	ENSMUSG00000094103;ENSMUSG00000095595	Fam177a2;Fam177a	2
Q8BW96;Q8BW96-2;Q8BW96-3;Q91YS8	ENSMUSG00000039145;ENSMUSG00000030272	Camk1d;Camk1	2
Q8C0T1;Q9Z2G1	ENSMUSG00000078157;ENSMUSG00000043683	Fem1al;Fem1a	2
Q8C1N8;Q8C1P2;W4VSN6	ENSMUSG00000074443;ENSMUSG00000074447	Defa22;Defa21	2
Q8C7I4;Q8VDU3	ENSMUSG00000068246;ENSMUSG00000057346	Apol9b;Apol9a	2
Q8CFG9;Q8CG16	ENSMUSG00000098470;ENSMUSG00000055172	C1rb;C1ra	2
Q8JZW4;Q9DC53	ENSMUSG00000024008;ENSMUSG00000052560	Cpne5;Cpne8	2
Q8R0A5;Q9DB24	ENSMUSG00000044550;ENSMUSG00000031409	Tceal3;Tceal6	2
Q8R3W2;Q9CQP2	ENSMUSG00000007777;ENSMUSG00000079317	0610009B22Rik;Trappc2	2
Q8VC28;Q9JLI0	ENSMUSG00000021213;ENSMUSG00000021211	Akr1c13;Akr1c12	2
Q8VD58	ENSMUSG00000093938;ENSMUSG00000070354	Evi2b;Evi2	2
Q8VDU1;Q9EQT3	ENSMUSG00000034226;ENSMUSG00000039960	Rhov;Rhou	2
Q8VDW0;Q9Z1N5	ENSMUSG00000005481;ENSMUSG00000019432	Ddx39a;Ddx39b	2
Q91V93;Q9DAK3	ENSMUSG00000022075;ENSMUSG00000019944	Rhobtb2;Rhobtb1	2
Q91VB8	ENSMUSG00000069919;ENSMUSG00000069917	Hba-a1;Hba-a2	2
Q91W53;Q9D428	ENSMUSG00000015341;ENSMUSG00000042532	Golga7;Golga7b	2
Q91XY0;Q91XY4;Q91XY5;Q91XY6;Q91XY8;Q91XZ0	ENSMUSG00000103897;ENSMUSG00000103677;ENSMUSG00000104346;ENSMUSG00000103332;ENSMUSG00000102742;ENSMUSG00000103144	Pcdhga8;Pcdhga4;Pcdhga3;Pcdhga2;Pcdhga11;Pcdhga1	6
Q91Z28;Q9EQR4;Q9QX15	ENSMUSG00000056025;ENSMUSG00000028262	Clca3a1;Clca3a2	2
Q91ZZ3;Q9Z0F7	ENSMUSG00000034891;ENSMUSG00000023064	Sncb;Sncg	2
Q925Q8-2;Q9QYB2;Q9QYB2-2	ENSMUSG00000025592;ENSMUSG00000055639	Dach2;Dach1	2
Q99KH8;Q9Z2W1	ENSMUSG00000063410;ENSMUSG00000026277	Stk24;Stk25	2
Q99LU0;Q9CQD4	ENSMUSG00000109901;ENSMUSG00000031242	Chmp1b;2610002M06Rik	2
Q99PB1;Q9CPR8	ENSMUSG00000100937;ENSMUSG00000070520	Nscme3l;Nsmce3	2
Q9CPN9;REV__B1ASC0;REV__H7BWZ2;REV__H7BX74;REV__H7BX92;REV__Q8CGM1;REV__Q8CGM1-2;REV__Q8CGM1-3	ENSMUSG00000029882;ENSMUSG00000028782	2210010C04Rik;Adgrb2	2
Q9CPZ6;Q9CQZ0-2	ENSMUSG00000038150;ENSMUSG00000025353	Ormdl3;Ormdl2	2
Q9CQ21;Q9DB27;Q9DB27-2	ENSMUSG00000042814;ENSMUSG00000000355	Mcts2;Mcts1	2
Q9CQC7	ENSMUSG00000022820	Ndufb4;Ndufb4b	2
Q9CQP2	ENSMUSG00000079317;ENSMUSG00000007777	Trappc2;0610009B22Rik	2
Q9CZH3;S4R185	ENSMUSG00000029551;ENSMUSG00000098140	Psmg3;Gm26938	2
Q9D1F0	ENSMUSG00000067925;ENSMUSG00000067924	Rtl8a;Rtl8b	2
Q9D6K5;Q9D6K5-2;Q9D6K5-3	ENSMUSG00000021139;ENSMUSG00000090935	Gm20498;Synj2bp	2
Q9D6K5;Q9D6K5-2;Q9D6K5-3;Q9D6K5-4	ENSMUSG00000021139;ENSMUSG00000090935	Gm20498;Synj2bp	2
Q9D823	ENSMUSG00000072692;ENSMUSG00000041841	Rpl37rt;Rpl37	2
Q9EQR4;Q9QX15	ENSMUSG00000028262;ENSMUSG00000056025	Clca3a2;Clca3a1	2
Q9JIB3;Q9JIB6;Q9R016	ENSMUSG00000078942;ENSMUSG00000071203	Naip7;Naip6;Naip5	3
Q9JLZ6;Q9JLZ6-2;Q9R1Y5;Z4YJP0	ENSMUSG00000050240;ENSMUSG00000043099	Hic2;Hic1	2
Q9JMA7	ENSMUSG00000075552;ENSMUSG00000075551	Cyp3a41b;Cyp3a41a	2
Q9QUK9;Q9R0T7	ENSMUSG00000036938;ENSMUSG00000054106	Try5;Try4	2
Q9QWT9;Q9QWT9-2;Q9QWT9-3	ENSMUSG00000079553;ENSMUSG00000024301	Kifc1;Kifc5b	2
Q9WTN6;Q9Z0E8	ENSMUSG00000063652;ENSMUSG00000018900	Slc22a21;Slc22a5	2

## Sheet: Rat
Majority.protein.IDs	Gene ID	Gene.Symbol	unique.gene.count
sp|O08590|AOC3_RAT;tr|A0A0G2JWZ2|A0A0G2JWZ2_RAT	ENSRNOG00000051307;ENSRNOG00000053448	AC123346.1;Aoc3	2
tr|Q5XIW0|Q5XIW0_RAT;sp|O35093|TIM23_RAT	ENSRNOG00000019811	LOC100362432;Timm23	2
tr|A0A0G2K0P9|A0A0G2K0P9_RAT;sp|O35142|COPB2_RAT	ENSRNOG00000060723	AABR07071244.1;Copb2	2
sp|O35509|RB11B_RAT;tr|A0A0G2JZR4|A0A0G2JZR4_RAT;sp|P62494|RB11A_RAT	ENSRNOG00000007648;ENSRNOG00000011302	Rab11a;Rab11b	2
tr|A0A0G2JSV6|A0A0G2JSV6_RAT;sp|P01946|HBA_RAT	ENSRNOG00000029886;ENSRNOG00000047321	Hba-a1;Hba-a2	2
tr|M0R5J4|M0R5J4_RAT;sp|P04764|ENOA_RAT	ENSRNOG00000017895;ENSRNOG00000028543	AABR07052523.1;Eno1	2
sp|P04797|G3P_RAT;tr|M0R590|M0R590_RAT;tr|D3ZGY4|D3ZGY4_RAT	ENSRNOG00000018630;ENSRNOG00000033057	AABR07025010.1;Gapdh;LOC108351137	3
sp|P05065|ALDOA_RAT;tr|Q6AY07|Q6AY07_RAT	ENSRNOG00000030869;ENSRNOG00000052802	Aldoa;Aldoart2	2
sp|P08644-2|RASK_RAT;sp|Q04970|RASN_RAT;sp|P20171|RASH_RAT;sp|P08644|RASK_RAT	ENSRNOG00000009338;ENSRNOG00000016611;ENSRNOG00000023079	Hras;Kras;Nras	3
tr|A0A0G2JSV3|A0A0G2JSV3_RAT;sp|P60892|PRPS1_RAT;sp|P09330|PRPS2_RAT;tr|M0RBK1|M0RBK1_RAT	ENSRNOG00000004160;ENSRNOG00000032513;ENSRNOG00000056011;ENSRNOG00000060262	LOC314140;Prps1;Prps1l1;Prps2	4
tr|D3ZHP8|D3ZHP8_RAT;sp|P09895|RL5_RAT	ENSRNOG00000023529;ENSRNOG00000037220	AABR07031089.1;Rpl5	2
tr|A0A0A0MXW3|A0A0A0MXW3_RAT;tr|D4AEC0|D4AEC0_RAT;sp|P0C0S7|H2AZ_RAT	ENSRNOG00000010306;ENSRNOG00000052275	H2az1;H2az2	2
tr|D4ACV3|D4ACV3_RAT;sp|P0CC09|H2A2A_RAT	ENSRNOG00000047898;ENSRNOG00000052555	Hist2h2aa2;Hist2h2aa3	2
sp|P62986|RL40_RAT;sp|P62982|RS27A_RAT;sp|P0CG51|UBB_RAT;tr|F1LML2|F1LML2_RAT;sp|Q63429|UBC_RAT;tr|F1LU69|F1LU69_RAT	ENSRNOG00000004426;ENSRNOG00000019974;ENSRNOG00000057823	Rps27a;Uba52;Ubc	3
sp|P0DMW1|HS71B_RAT;sp|P0DMW0|HS71A_RAT		Hspa1a;Hspa1b	2
sp|P0DP31|CALM3_RAT;sp|P0DP30|CALM2_RAT;sp|P0DP29|CALM1_RAT;tr|D4ABV5|D4ABV5_RAT	ENSRNOG00000004060;ENSRNOG00000016770;ENSRNOG00000030871	Calm1;Calm2;Calm3	3
sp|P10111|PPIA_RAT;tr|A0A0G2K1P0|A0A0G2K1P0_RAT;tr|A0A0G2K2E4|A0A0G2K2E4_RAT	ENSRNOG00000027864;ENSRNOG00000031045;ENSRNOG00000055068	LOC100911252;Ppia;Ppial4d	3
sp|P10959|EST1C_RAT;tr|D3ZGK7|D3ZGK7_RAT	ENSRNOG00000015438	Ces1c;Ces1f;LOC501233	3
sp|P11517|HBB2_RAT	ENSRNOG00000047098;ENSRNOG00000061299	Hbb-bs;LOC100134871	2
sp|P12711|ADHX_RAT;tr|Q7TQ90|Q7TQ90_RAT	ENSRNOG00000046357	Adh4;Adh5	2
tr|Q6PDV6|Q6PDV6_RAT;sp|P13471|RS14_RAT	ENSRNOG00000018774	LOC100911847;Rps14	2
sp|P15791-5|KCC2D_RAT;sp|P15791-7|KCC2D_RAT;sp|P15791-2|KCC2D_RAT;sp|P15791-3|KCC2D_RAT;sp|P15791-6|KCC2D_RAT;sp|P15791-4|KCC2D_RAT;sp|P15791|KCC2D_RAT;sp|P11730-3|KCC2G_RAT;sp|P11730-2|KCC2G_RAT;sp|P11730|KCC2G_RAT;tr|F1M3F8|F1M3F8_RAT;tr|G3V9G3|G3V9G3_RAT;sp|P08413|KCC2B_RAT;tr|F1LNI8|F1LNI8_RAT;tr|F1LUE2|F1LUE2_RAT;sp|P11275|KCC2A_RAT	ENSRNOG00000009783;ENSRNOG00000011589;ENSRNOG00000018712;ENSRNOG00000052080	Camk2a;Camk2b;Camk2d;Camk2g	4
sp|P15865|H14_RAT;tr|A0A0G2K654|A0A0G2K654_RAT;tr|M0R7B4|M0R7B4_RAT	ENSRNOG00000047459;ENSRNOG00000048264;ENSRNOG00000054978	H1f2;H1f4;H4f3	3
sp|P15999|ATPA_RAT;tr|F1LP05|F1LP05_RAT;tr|A0A0G2K099|A0A0G2K099_RAT	ENSRNOG00000017032;ENSRNOG00000054846	AABR07022393.1;Atp5f1a	2
tr|D4A6G6|D4A6G6_RAT;sp|P17074|RS19_RAT;tr|D3ZSH6|D3ZSH6_RAT;tr|F1M764|F1M764_RAT;tr|A0A0H2UI38|A0A0H2UI38_RAT;tr|F1M8C7|F1M8C7_RAT;tr|D3ZUD7|D3ZUD7_RAT;tr|D3ZGN8|D3ZGN8_RAT;tr|F1LYF3|F1LYF3_RAT	ENSRNOG00000005430;ENSRNOG00000009861;ENSRNOG00000013292;ENSRNOG00000032482;ENSRNOG00000037897	AABR07028859.1;AABR07029006.1;AABR07040944.1;AC117101.1;Rps19;Rps19l2	6
tr|A0A0G2JXD0|A0A0G2JXD0_RAT;sp|P17077|RL9_RAT;tr|M0R6B4|M0R6B4_RAT;tr|F1M7A9|F1M7A9_RAT;tr|M0RBD4|M0RBD4_RAT;tr|M0R5Y8|M0R5Y8_RAT;tr|A0A0G2JX41|A0A0G2JX41_RAT	ENSRNOG00000026716;ENSRNOG00000028449;ENSRNOG00000030152;ENSRNOG00000030476;ENSRNOG00000031879;ENSRNOG00000033207;ENSRNOG00000052909;ENSRNOG00000055770;ENSRNOG00000058695;ENSRNOG00000061320	AABR07009638.1;AABR07014676.1;AABR07026048.1;AABR07036746.1;AABR07050391.2;AABR07050399.1;LOC100360449;LOC100364457;LOC103692829;Rpl9	10
tr|A0A0G2JSW0|A0A0G2JSW0_RAT;sp|P18666|ML12B_RAT;sp|P13832|MRLCA_RAT	ENSRNOG00000015278;ENSRNOG00000015733	Myl12a;Myl12b	2
sp|P19944|RLA1_RAT;tr|A0A0H2UHJ3|A0A0H2UHJ3_RAT	ENSRNOG00000011955;ENSRNOG00000013874	AABR07026997.1;LOC100360522;Rplp1	3
tr|F1LQS3|F1LQS3_RAT;sp|P21533|RL6_RAT;tr|A0A0G2KBA1|A0A0G2KBA1_RAT	ENSRNOG00000025936;ENSRNOG00000055942	AC120310.1;Rpl6	2
sp|P21775-2|THIKA_RAT;tr|F1LPD6|F1LPD6_RAT;sp|P21775|THIKA_RAT;sp|P07871|THIKB_RAT	ENSRNOG00000032908	Acaa1a;Acaa1b	2
sp|P23358|RL12_RAT;tr|D3ZJE2|D3ZJE2_RAT;tr|A0A140TAC5|A0A140TAC5_RAT		LOC102555453;Rpl12	2
sp|P24090|FETUA_RAT;tr|F1LM19|F1LM19_RAT;tr|Q7TP75|Q7TP75_RAT	ENSRNOG00000038370	AABR07034632.1;Ahsg	2
sp|P27791-2|KAPCA_RAT;tr|A1L1M0|A1L1M0_RAT;sp|P27791|KAPCA_RAT;sp|P68182|KAPCB_RAT	ENSRNOG00000004978;ENSRNOG00000005257	Prkaca;Prkacb	2
sp|P30713|GSTT2_RAT;tr|A0A0G2JZV9|A0A0G2JZV9_RAT;tr|A0A0G2K3C6|A0A0G2K3C6_RAT	ENSRNOG00000052415	Gstt2;LOC103694879	2
sp|P30904|MIF_RAT;tr|D3ZE63|D3ZE63_RAT		AC127887.1;Mif	2
sp|P35171|CX7A2_RAT	ENSRNOG00000042903	Cox7a2;Cox7a2l2	2
sp|P35435|ATPG_RAT;tr|Q6PCU0|Q6PCU0_RAT;tr|Q6QI09|Q6QI09_RAT	ENSRNOG00000019223	Atp5f1c;Taf3	2
sp|P39069|KAD1_RAT;tr|A0A0G2K7Q6|A0A0G2K7Q6_RAT	ENSRNOG00000049056	AABR07051450.1;Ak1	2
tr|D3Z8J0|D3Z8J0_RAT;sp|P40112|PSB3_RAT	ENSRNOG00000038259;ENSRNOG00000052730	AABR07053749.1;Psmb3	2
tr|A0A0G2JYG9|A0A0G2JYG9_RAT;tr|F1M2E9|F1M2E9_RAT;tr|D3ZD02|D3ZD02_RAT;tr|D3ZRM9|D3ZRM9_RAT;sp|P41123|RL13_RAT	ENSRNOG00000015335;ENSRNOG00000029227;ENSRNOG00000059545	AABR07054469.1;AC114446.1;Rpl13	3
tr|M0R3X6|M0R3X6_RAT;tr|A0A0G2JSV2|A0A0G2JSV2_RAT;sp|P47727|CBR1_RAT;tr|A0A0G2K658|A0A0G2K658_RAT;tr|A0A096MJ24|A0A096MJ24_RAT	ENSRNOG00000049693;ENSRNOG00000049911	Cbr1;LOC102556347	2
sp|P48500|TPIS_RAT;tr|A0A0G2JWJ4|A0A0G2JWJ4_RAT;tr|A0A0G2JWU1|A0A0G2JWU1_RAT	ENSRNOG00000015290;ENSRNOG00000055222	AC094212.1;Tpi1	2
sp|P51583|PUR6_RAT;tr|A0A0G2K5S4|A0A0G2K5S4_RAT	ENSRNOG00000002101;ENSRNOG00000056398	AABR07036855.1;Paics	2
tr|G3V715|G3V715_RAT;sp|Q09137|AAPK2_RAT;sp|P54645|AAPK1_RAT	ENSRNOG00000007706;ENSRNOG00000012799	Prkaa1;Prkaa2	2
sp|P54921|SNAA_RAT;sp|P85969|SNAB_RAT;tr|F8WFM2|F8WFM2_RAT	ENSRNOG00000001494;ENSRNOG00000004753	Napa;Napb	2
sp|P63259|ACTG_RAT;sp|P60711|ACTB_RAT;tr|A0A0G2K3K2|A0A0G2K3K2_RAT	ENSRNOG00000034254;ENSRNOG00000036701;ENSRNOG00000053452	Actb;Actg1;LOC100361457	3
tr|A0A0G2JY70|A0A0G2JY70_RAT;tr|A0A0H2UHG7|A0A0H2UHG7_RAT;tr|D3ZZK1|D3ZZK1_RAT;tr|A0A0G2K6L6|A0A0G2K6L6_RAT;sp|P60868|RS20_RAT;tr|M0RB28|M0RB28_RAT;tr|M0R5V6|M0R5V6_RAT;tr|M0R566|M0R566_RAT;tr|A0A0G2K8W1|A0A0G2K8W1_RAT;tr|M0R987|M0R987_RAT	ENSRNOG00000008555;ENSRNOG00000029341;ENSRNOG00000029627;ENSRNOG00000029843;ENSRNOG00000030345;ENSRNOG00000030426;ENSRNOG00000030596;ENSRNOG00000031205;ENSRNOG00000048426;ENSRNOG00000054540;ENSRNOG00000055526;ENSRNOG00000056863;ENSRNOG00000059138;ENSRNOG00000061454	AABR07036375.1;AABR07043775.1;AABR07043776.1;AABR07044509.1;AABR07050116.1;AABR07070957.1;AC121204.2;AC126292.2;AC136584.1;LOC100359951;LOC100362149;LOC100362684;LOC100364116;Rps20	14
sp|P61314|RL15_RAT;tr|D3ZF52|D3ZF52_RAT	ENSRNOG00000008140;ENSRNOG00000023181	RGD1565767;Rpl15	2
sp|P61589|RHOA_RAT;tr|B2RYP0|B2RYP0_RAT;tr|A0A0G2K6E0|A0A0G2K6E0_RAT	ENSRNOG00000012630;ENSRNOG00000050519	Rhoa;Rhoc	2
sp|P62083|RS7_RAT	ENSRNOG00000008551;ENSRNOG00000027694	LOC100362830;Rps7	2
sp|P62142|PP1B_RAT;tr|A0A0G2JYS8|A0A0G2JYS8_RAT;sp|P63088|PP1G_RAT;sp|P62138|PP1A_RAT;tr|A0A0G2JVK2|A0A0G2JVK2_RAT;sp|P63088-2|PP1G_RAT	ENSRNOG00000001269;ENSRNOG00000004612;ENSRNOG00000018708	Ppp1ca;Ppp1cb;Ppp1cc	3
sp|P62243|RS8_RAT;tr|M0R7Q5|M0R7Q5_RAT;tr|Q6TXJ0|Q6TXJ0_RAT	ENSRNOG00000007238;ENSRNOG00000054626	LOC297756;Rps8	2
sp|P62250|RS16_RAT;tr|A0A1W2Q631|A0A1W2Q631_RAT;tr|M0R4I3|M0R4I3_RAT	ENSRNOG00000019578;ENSRNOG00000030143	AABR07051796.1;Rps16	2
tr|M0R5K9|M0R5K9_RAT;tr|A0A0H2UHT6|A0A0H2UHT6_RAT;tr|D3ZM33|D3ZM33_RAT;tr|D3ZAU6|D3ZAU6_RAT;sp|P62271|RS18_RAT;tr|D4AA93|D4AA93_RAT;tr|A0A0G2KA79|A0A0G2KA79_RAT	ENSRNOG00000014169;ENSRNOG00000028505;ENSRNOG00000029600;ENSRNOG00000030107;ENSRNOG00000032944;ENSRNOG00000033152;ENSRNOG00000033451	AABR07042892.1;AABR07048312.1;AABR07049320.1;AABR07049329.1;AABR07057460.1;Rps18;Rps18l1	7
tr|F1M013|F1M013_RAT;tr|F1M4C7|F1M4C7_RAT;tr|D4A6B9|D4A6B9_RAT;tr|D3ZU22|D3ZU22_RAT;tr|D3ZNA3|D3ZNA3_RAT;sp|P62425|RL7A_RAT;tr|D3ZJH5|D3ZJH5_RAT;tr|D3ZPL5|D3ZPL5_RAT;tr|M0R3M3|M0R3M3_RAT;tr|F1M1M2|F1M1M2_RAT	ENSRNOG00000028826;ENSRNOG00000029130;ENSRNOG00000029310;ENSRNOG00000029423;ENSRNOG00000031532;ENSRNOG00000031902;ENSRNOG00000033843;ENSRNOG00000047737;ENSRNOG00000049097	AABR07007121.1;AABR07018167.1;AABR07027819.1;AABR07049918.1;AABR07052519.1;AABR07057586.1;AC128901.1;Rpl7a	8
tr|M0R757|M0R757_RAT;sp|P62630|EF1A1_RAT;tr|F1M6C2|F1M6C2_RAT	ENSRNOG00000009439;ENSRNOG00000029996	AABR07054368.1;Eef1a1	2
tr|M0RD75|M0RD75_RAT;sp|P62755|RS6_RAT;tr|A0A0G2K7G8|A0A0G2K7G8_RAT	ENSRNOG00000014002;ENSRNOG00000049025	Rps6;St7l	2
sp|P62804|H4_RAT		Hist1h2ao;Hist1h4b;Hist1h4m;Hist2h4	4
sp|P62828|RAN_RAT;tr|Q66H11|Q66H11_RAT;sp|Q8K586|RANT_RAT	ENSRNOG00000000938;ENSRNOG00000031013;ENSRNOG00000032913	Ran;Rasl2-9;RGD1306195	3
sp|P62836|RAP1A_RAT;sp|Q62636|RAP1B_RAT	ENSRNOG00000007048;ENSRNOG00000032463	Rap1a;Rap1b	2
sp|P62870|ELOB_RAT;tr|F1M937|F1M937_RAT;tr|A0A140TA99|A0A140TA99_RAT;tr|F1LZ51|F1LZ51_RAT;tr|M0R6V0|M0R6V0_RAT	ENSRNOG00000004814;ENSRNOG00000007803;ENSRNOG00000033199;ENSRNOG00000046568	AABR07051791.1;AABR07068955.1;AC132539.1;Elob	4
tr|D4A5L9|D4A5L9_RAT;sp|P62898|CYC_RAT	ENSRNOG00000010452;ENSRNOG00000032885;ENSRNOG00000033559	AC128290.1;Cycs;LOC100363502	3
sp|P62959|HINT1_RAT;tr|D4A269|D4A269_RAT	ENSRNOG00000000622;ENSRNOG00000005630	AABR07060778.1;Hint1	2
sp|P63018|HSP7C_RAT;tr|M0RCB1|M0RCB1_RAT;tr|D4A4S3|D4A4S3_RAT;tr|M0R8M9|M0R8M9_RAT;tr|F1LZI1|F1LZI1_RAT;tr|A0A0G2JVI3|A0A0G2JVI3_RAT	ENSRNOG00000032585;ENSRNOG00000034066;ENSRNOG00000034093;ENSRNOG00000061099	AABR07011951.1;AABR07033324.1;AABR07048992.1;Hspa8	4
sp|P63086|MK01_RAT;sp|P21708|MK03_RAT;sp|P21708-2|MK03_RAT	ENSRNOG00000001849;ENSRNOG00000053583	Mapk1;Mapk3	2
tr|D3ZCR3|D3ZCR3_RAT;tr|A0A0G2K6P4|A0A0G2K6P4_RAT;sp|P63159|HMGB1_RAT;tr|D3ZN59|D3ZN59_RAT;sp|P52925|HMGB2_RAT;tr|D3ZC69|D3ZC69_RAT;tr|M0R7R5|M0R7R5_RAT;tr|D3ZXR5|D3ZXR5_RAT;tr|F1LNG6|F1LNG6_RAT	ENSRNOG00000013167;ENSRNOG00000026462;ENSRNOG00000029813;ENSRNOG00000033321;ENSRNOG00000034130;ENSRNOG00000038478;ENSRNOG00000048094;ENSRNOG00000048471;ENSRNOG00000051482;ENSRNOG00000058908	AABR07029613.1;AABR07035218.1;AABR07054355.1;AABR07054358.1;Hmg1l1;Hmgb1;Hmgb2;Hmgb2l1;LOC108349189;RGD1559962	10
tr|A0A0H2UI18|A0A0H2UI18_RAT;tr|F1LT36|F1LT36_RAT;sp|P63326|RS10_RAT;tr|D3ZJY5|D3ZJY5_RAT;tr|Q7TP86|Q7TP86_RAT;tr|D3ZH53|D3ZH53_RAT;tr|D4A5N7|D4A5N7_RAT;tr|D3ZCN9|D3ZCN9_RAT		AABR07017250.1;AABR07024954.1;AABR07057264.1;AABR07063995.1;Rps10;Rps10l1	6
sp|P63331|PP2AA_RAT;tr|A0A0G2JYA4|A0A0G2JYA4_RAT;sp|P62716|PP2AB_RAT	ENSRNOG00000005389;ENSRNOG00000015182	Ppp2ca;Ppp2cb	2
sp|P68035|ACTC_RAT;tr|A0A0G2K4M6|A0A0G2K4M6_RAT;sp|P62738|ACTA_RAT;sp|P63269|ACTH_RAT	ENSRNOG00000008536;ENSRNOG00000029401;ENSRNOG00000058039	Acta2;Actc1;Actg2	3
sp|P68370|TBA1A_RAT;sp|Q68FR8|TBA3_RAT	ENSRNOG00000031707;ENSRNOG00000032967;ENSRNOG00000060728	Tuba1a;Tuba3a;Tuba3b	3
sp|P81795|IF2G_RAT;sp|C9WPN6|IF2H_RAT	ENSRNOG00000060048;ENSRNOG00000060793	Eif2s3;Eif2s3y	2
sp|P83941|ELOC_RAT;tr|A0A0G2K2A0|A0A0G2K2A0_RAT	ENSRNOG00000031730;ENSRNOG00000061371	AABR07035541.3;Eloc	2
sp|P84079|ARF1_RAT;tr|A0A0G2JV81|A0A0G2JV81_RAT;sp|P61206|ARF3_RAT;tr|A0A0G2K9H8|A0A0G2K9H8_RAT;tr|A0A0G2K4Q4|A0A0G2K4Q4_RAT;sp|P84082|ARF2_RAT	ENSRNOG00000004807;ENSRNOG00000054775;ENSRNOG00000057515;ENSRNOG00000060229	AABR07046136.1;Arf1;Arf2;Arf3;Fkbp11	5
tr|D3ZK97|D3ZK97_RAT;sp|P84245|H33_RAT	ENSRNOG00000003220;ENSRNOG00000006532;ENSRNOG00000032401	H3f3a;H3f3b;H3f3c	3
sp|Q3KRE8|TBB2B_RAT;sp|P85108|TBB2A_RAT	ENSRNOG00000017445;ENSRNOG00000017558	Tubb2a;Tubb2b	2
sp|P85968|6PGD_RAT;tr|A0A0G2K7Q8|A0A0G2K7Q8_RAT	ENSRNOG00000057626	Kif1b;Pgd	2
sp|Q00715|H2B1_RAT;tr|M0R4L7|M0R4L7_RAT;tr|G3V9C7|G3V9C7_RAT;tr|G3V8B3|G3V8B3_RAT;tr|D3ZWM5|D3ZWM5_RAT;tr|D3ZLY9|D3ZLY9_RAT;tr|A0A0G2JXE0|A0A0G2JXE0_RAT;tr|D3ZNH4|D3ZNH4_RAT;tr|A0A0G2JXI9|A0A0G2JXI9_RAT;tr|A0A0G2K7R1|A0A0G2K7R1_RAT;tr|M0RBQ5|M0RBQ5_RAT;tr|D4A817|D4A817_RAT;tr|D3ZNZ9|D3ZNZ9_RAT	ENSRNOG00000021198;ENSRNOG00000031790;ENSRNOG00000043419;ENSRNOG00000045753;ENSRNOG00000047776;ENSRNOG00000053845;ENSRNOG00000054296;ENSRNOG00000055512;ENSRNOG00000058187;ENSRNOG00000058263;ENSRNOG00000059093;ENSRNOG00000059382;ENSRNOG00000059949;ENSRNOG00000060769	AABR07012583.2;H2bc12;H2bc9;H2bu1;Hist1h2bc;Hist1h2bd;Hist1h2bg;Hist1h2bl;Hist1h2bo;Hist1h2bq;Hist2h2be;Hist3h2ba;LOC100364835;LOC100365043;LOC100910200;LOC102549061;LOC684797	17
tr|M0R8A4|M0R8A4_RAT;sp|Q3B8Q0|MARE2_RAT;tr|M0R7M8|M0R7M8_RAT;tr|A0A096MJC9|A0A096MJC9_RAT;tr|A0A096MJL2|A0A096MJL2_RAT	ENSRNOG00000047261;ENSRNOG00000049681	AABR07031445.1;AABR07031491.2;Mapre2	3
sp|Q3T1J1|IF5A1_RAT;tr|G3V7J7|G3V7J7_RAT	ENSRNOG00000011859;ENSRNOG00000016478	Eif5a;Eif5a2	2
sp|Q561S0|NDUAA_RAT;tr|A0A1W2Q6F8|A0A1W2Q6F8_RAT	ENSRNOG00000016470;ENSRNOG00000062245	Ndufa10;Ndufa10l1	2
sp|Q5EB94|MYZAP_RAT;tr|H8Y6S5|H8Y6S5_RAT	ENSRNOG00000057676	Myzap;Polr2m	2
sp|Q5I0P2|GCSH_RAT;tr|A0A0G2JZ02|A0A0G2JZ02_RAT	ENSRNOG00000011535;ENSRNOG00000051496	AABR07007134.1;Gcsh	2
sp|Q5RKI1|IF4A2_RAT;tr|A0A0G2K8B7|A0A0G2K8B7_RAT;tr|Q6P3V8|Q6P3V8_RAT	ENSRNOG00000001815;ENSRNOG00000030628	Eif4a1;Eif4a2	2
sp|Q5XIB3|ARHL1_RAT;tr|Q6TXE7|Q6TXE7_RAT	ENSRNOG00000019504;ENSRNOG00000062013	AABR07026536.1;Adprhl1	2
tr|A0A0G2KAT4|A0A0G2KAT4_RAT;sp|Q63413|DX39B_RAT;sp|Q5U216|DX39A_RAT	ENSRNOG00000000841;ENSRNOG00000004373	Ddx39a;Ddx39b	2
tr|F1LSW7|F1LSW7_RAT;sp|Q63507|RL14_RAT;tr|B5DEM5|B5DEM5_RAT;tr|Q6TUH8|Q6TUH8_RAT	ENSRNOG00000019007;ENSRNOG00000031061	LOC306079;Rpl14	2
tr|F1LPK7|F1LPK7_RAT;sp|Q63598|PLST_RAT;tr|Q5XI38|Q5XI38_RAT;tr|A0A0G2K014|A0A0G2K014_RAT	ENSRNOG00000010319;ENSRNOG00000027520	Lcp1;Pls3	2
tr|A0A0G2K3Z9|A0A0G2K3Z9_RAT;sp|Q63716|PRDX1_RAT	ENSRNOG00000017194;ENSRNOG00000017695	AABR07012795.1;Prdx1	2
sp|Q63945-2|SET_RAT;tr|A0A0G2JSU3|A0A0G2JSU3_RAT;sp|Q63945|SET_RAT;tr|D3ZC07|D3ZC07_RAT;tr|A0A0G2K5L9|A0A0G2K5L9_RAT	ENSRNOG00000034241;ENSRNOG00000052952	AABR07031963.1;Set	2
tr|A0A0G2K6H7|A0A0G2K6H7_RAT;tr|M0RD20|M0RD20_RAT;sp|Q64537|CPNS1_RAT	ENSRNOG00000060312	Capns1;LOC108348197	2
sp|Q6LED0|H31_RAT		H3c1;Hist1h2ail1;Hist1h3b	3
sp|Q6P791|LTOR1_RAT	ENSRNOG00000020016	Lamtor1;LOC100361543	2
sp|Q6PEC0|AP4A_RAT;tr|D3ZH27|D3ZH27_RAT	ENSRNOG00000013110	LOC100910067;Nudt2	2
tr|M0R5T4|M0R5T4_RAT;sp|Q6RUV5|RAC1_RAT;tr|A0A0G2K0X4|A0A0G2K0X4_RAT;tr|Q5U1Y2|Q5U1Y2_RAT	ENSRNOG00000001068;ENSRNOG00000007350	Rac1;Rac2	2
sp|Q6URK4-2|ROA3_RAT;sp|Q6URK4|ROA3_RAT;tr|E9PSU5|E9PSU5_RAT;tr|D4A6A2|D4A6A2_RAT	ENSRNOG00000038905;ENSRNOG00000052968	AABR07048397.1;Hnrnpa3	2
sp|Q78P75|DYL2_RAT;tr|A0A0G2JU43|A0A0G2JU43_RAT;sp|P63170|DYL1_RAT	ENSRNOG00000008921;ENSRNOG00000011222;ENSRNOG00000052174	Dynll1;Dynll2;LOC100361920	3
sp|Q7M0E3|DEST_RAT;tr|D4A315|D4A315_RAT	ENSRNOG00000005924;ENSRNOG00000026891	AC093995.1;Dstn	2
tr|G3V9Q3|G3V9Q3_RAT;sp|Q8VHV7-3|HNRH1_RAT;sp|Q8VHV7-2|HNRH1_RAT;tr|A0A0G2JTG7|A0A0G2JTG7_RAT;sp|Q8VHV7|HNRH1_RAT;sp|Q794E4|HNRPF_RAT;sp|Q6AY09|HNRH2_RAT	ENSRNOG00000003399;ENSRNOG00000011661;ENSRNOG00000014562	Hnrnpf;Hnrnph1;Hnrnph2	3
sp|Q8VIF7|SBP1_RAT;tr|F1LRJ9|F1LRJ9_RAT	ENSRNOG00000047158;ENSRNOG00000053812	LOC103689947;Selenbp1	2
tr|A0A0G2K9Y5|A0A0G2K9Y5_RAT;sp|Q99PS8|HRG_RAT;tr|A0A0G2K3G0|A0A0G2K3G0_RAT	ENSRNOG00000001809	Hrg;LOC681544	2
sp|Q9JJW3|ATPMK_RAT	ENSRNOG00000020296;ENSRNOG00000042869	Atp5mk;LOC103693430	2
tr|F1LP21|F1LP21_RAT;sp|Q9WVA1|TIM8A_RAT;tr|F1M556|F1M556_RAT	ENSRNOG00000011226;ENSRNOG00000043480	AABR07071440.1;Timm8a1	2
tr|A0A0G2JTW9|A0A0G2JTW9_RAT	ENSRNOG00000047098;ENSRNOG00000061299	Hbb-b1;Hbb-bs;LOC100134871	3
tr|F7EPH4|F7EPH4_RAT;tr|A0A0G2JUD2|A0A0G2JUD2_RAT	ENSRNOG00000000557	Ppa1;Sar1a	2
tr|A0A0G2JXF0|A0A0G2JXF0_RAT;tr|A0A0G2K3L5|A0A0G2K3L5_RAT;tr|A0A0G2JW41|A0A0G2JW41_RAT	ENSRNOG00000051739;ENSRNOG00000056290;ENSRNOG00000061431	AABR07061001.1;AABR07061052.1;AABR07061134.1	3
tr|A0A0G2JY69|A0A0G2JY69_RAT;tr|G3V907|G3V907_RAT;sp|Q9QYU1|PEX19_RAT		LOC102548286;Pex19	2
tr|A0A0G2JZM2|A0A0G2JZM2_RAT;tr|B5DFC3|B5DFC3_RAT;tr|D3ZCT7|D3ZCT7_RAT	ENSRNOG00000004657;ENSRNOG00000008411	Sec23a;Sec23b	2
tr|A0A0G2K0W9|A0A0G2K0W9_RAT;sp|P48004-2|PSA7_RAT;tr|F1M6I7|F1M6I7_RAT;sp|P48004|PSA7_RAT	ENSRNOG00000030363;ENSRNOG00000056853	Psma7;Psma8	2
tr|A0A0G2K3A6|A0A0G2K3A6_RAT;tr|A0A0G2K290|A0A0G2K290_RAT;tr|D3ZE00|D3ZE00_RAT;tr|A0A0G2JUY4|A0A0G2JUY4_RAT;tr|F1LYU3|F1LYU3_RAT;tr|A0A0G2K4A4|A0A0G2K4A4_RAT;tr|A0A0G2K304|A0A0G2K304_RAT;tr|M0RBL2|M0RBL2_RAT;tr|M0R8Q9|M0R8Q9_RAT;tr|A0A0G2JWW4|A0A0G2JWW4_RAT;tr|A0A0G2JT95|A0A0G2JT95_RAT	ENSRNOG00000048458;ENSRNOG00000049243;ENSRNOG00000050912;ENSRNOG00000051768;ENSRNOG00000053312;ENSRNOG00000056043;ENSRNOG00000056760;ENSRNOG00000056828;ENSRNOG00000058352;ENSRNOG00000058562;ENSRNOG00000059121	AABR07065651.4;AABR07065651.8;AABR07065656.3;AABR07065656.4;AABR07065656.8;AABR07065684.1;AABR07065693.2;AABR07065699.4;AABR07065705.1;AABR07065705.3;AABR07065714.1	11
tr|A0A0G2K4U2|A0A0G2K4U2_RAT	ENSRNOG00000018937	Gstm2;Gstm7	2
tr|A0A0G2K719|A0A0G2K719_RAT;tr|A0A0G2K9N3|A0A0G2K9N3_RAT;tr|D3ZN21|D3ZN21_RAT	ENSRNOG00000002501;ENSRNOG00000023383	Ddx3x;Ddx3y	2
tr|D3ZJW3|D3ZJW3_RAT;tr|A0A0G2K781|A0A0G2K781_RAT;tr|G3V9H6|G3V9H6_RAT;tr|A0A0G2K383|A0A0G2K383_RAT	ENSRNOG00000019667;ENSRNOG00000031709	Ppfibp1;Ppfibp2	2
tr|A0A0G2K9Y0|A0A0G2K9Y0_RAT;tr|F1LPQ6|F1LPQ6_RAT;sp|P20759|IGHG1_RAT;tr|F1LN61|F1LN61_RAT;tr|A0A0G2K477|A0A0G2K477_RAT	ENSRNOG00000030332;ENSRNOG00000034190	Ighg1;Ighm	2
tr|A0A0H2UHX3|A0A0H2UHX3_RAT;tr|X1WI37|X1WI37_RAT;sp|P62703|RS4X_RAT;tr|D3ZX01|D3ZX01_RAT	ENSRNOG00000003201;ENSRNOG00000031041	Rps4x;Rps4y2	2
tr|B5DEL8|B5DEL8_RAT;tr|A0A0G2JZJ9|A0A0G2JZJ9_RAT	ENSRNOG00000026646;ENSRNOG00000029339;ENSRNOG00000052764	AABR07016779.1;LOC100363268;Ndufs5	3
tr|D3ZAS1|D3ZAS1_RAT;tr|A0A0G2KB28|A0A0G2KB28_RAT;tr|A0A0U1RVI9|A0A0U1RVI9_RAT;tr|D3ZIY7|D3ZIY7_RAT;tr|M0RAJ8|M0RAJ8_RAT;sp|P27952|RS2_RAT	ENSRNOG00000014179;ENSRNOG00000017167;ENSRNOG00000020641;ENSRNOG00000022934;ENSRNOG00000030174;ENSRNOG00000032289;ENSRNOG00000033244	AABR07033851.1;AABR07042903.1;AABR07066818.1;AABR07067814.1;AABR07069969.1;AC115384.1;Rps2	7
tr|D3ZE15|D3ZE15_RAT;tr|F1LZC5|F1LZC5_RAT	ENSRNOG00000020602;ENSRNOG00000021688	AABR07056686.1;Ndufa13	2
tr|D3ZFY8|D3ZFY8_RAT;tr|A0A0G2JU07|A0A0G2JU07_RAT;sp|Q7M767|UB2V2_RAT	ENSRNOG00000001829;ENSRNOG00000025580	LOC679539;Ube2v1;Ube2v2	3
tr|Q6PDW1|Q6PDW1_RAT;tr|D3ZHB3|D3ZHB3_RAT;sp|P63324|RS12_RAT	ENSRNOG00000016411;ENSRNOG00000020093	LOC100360573;Rps12	2
tr|D3ZJ08|D3ZJ08_RAT		H3c13;Hist2h3c2;LOC102548682;LOC102549173	4
tr|D3ZK34|D3ZK34_RAT;tr|D3ZU04|D3ZU04_RAT;tr|D3ZKU5|D3ZKU5_RAT;tr|D3Z8W1|D3Z8W1_RAT;tr|D4ACQ2|D4ACQ2_RAT;tr|D4ABZ9|D4ABZ9_RAT;tr|D3ZZ60|D3ZZ60_RAT;sp|P62902|RL31_RAT;tr|D3ZX87|D3ZX87_RAT	ENSRNOG00000013508;ENSRNOG00000029278;ENSRNOG00000030278;ENSRNOG00000030296;ENSRNOG00000033024;ENSRNOG00000039487;ENSRNOG00000050226;ENSRNOG00000050666	AABR07017576.1;AABR07021008.1;AABR07031947.1;AABR07032277.1;AABR07059675.1;AABR07071195.1;AC099453.1;Rpl31	8
tr|M0R785|M0R785_RAT;tr|D3ZTR5|D3ZTR5_RAT;tr|A0A0G2K6U2|A0A0G2K6U2_RAT	ENSRNOG00000000918;ENSRNOG00000053790	AABR07036007.1;Zbed5	2
tr|M0RA24|M0RA24_RAT;tr|D4A4P3|D4A4P3_RAT	ENSRNOG00000011825;ENSRNOG00000048888	AABR07060996.1;Ndufb3	2
tr|D4A6E3|D4A6E3_RAT;tr|A0A0G2JUW7|A0A0G2JUW7_RAT;sp|Q03626|MUG1_RAT;sp|Q03626-2|MUG1_RAT;tr|A0A0G2JUP5|A0A0G2JUP5_RAT	ENSRNOG00000037188	LOC297568;Mug1	2
tr|D4ADF5|D4ADF5_RAT;tr|B1H286|B1H286_RAT		Pdcd5;RGD1564319	2
tr|G3V9N0|G3V9N0_RAT;sp|Q9EPH8|PABP1_RAT;tr|D3ZSR2|D3ZSR2_RAT;tr|A0A0G2JZS2|A0A0G2JZS2_RAT	ENSRNOG00000008639;ENSRNOG00000015642	Pabpc1;Pabpc4	2
tr|Q4V8F6|Q4V8F6_RAT;tr|Q6AYU5|Q6AYU5_RAT;tr|Q6AY48|Q6AY48_RAT	ENSRNOG00000001245;ENSRNOG00000036852	Pcbp2;Pcbp3	2
tr|Q6AY18|Q6AY18_RAT;sp|Q5HZY2|SAR1B_RAT	ENSRNOG00000004820	Sar1a;Sar1b	2
tr|Q6IMX8|Q6IMX8_RAT;sp|O55171|ACOT2_RAT;sp|O88267|ACOT1_RAT	ENSRNOG00000010134;ENSRNOG00000055221	Acot1;Acot2	2
tr|A0A0G2JYU0|A0A0G2JYU0_RAT;tr|A0A0G2JYY7|A0A0G2JYY7_RAT;tr|D3ZSL1|D3ZSL1_RAT;sp|A1A5R1|RFOX2_RAT	ENSRNOG00000002827;ENSRNOG00000004688	Rbfox1;Rbfox2	2
tr|M0RDM4|M0RDM4_RAT;sp|A9UMV8|H2AJ_RAT;tr|G3V9C0|G3V9C0_RAT;tr|D3ZVK7|D3ZVK7_RAT;sp|Q4FZT6|H2A3_RAT;sp|P0C170|H2A1E_RAT;sp|P0C169|H2A1C_RAT;sp|P02262|H2A1_RAT;tr|Q6I8Q6|Q6I8Q6_RAT;tr|M0RCL5|M0RCL5_RAT;sp|Q64598|H2A1F_RAT;sp|Q00728|H2A4_RAT		H2ac1;H2ac4;H2aj;Hist1h2ac;Hist1h2af;Hist1h2ah;Hist1h2ai;hist1h2ail2;Hist1h2an;Hist3h2a;LOC100910554;LOC103690190;LOC684773	13
tr|A0A0H2UHV4|A0A0H2UHV4_RAT;tr|M0R7Z0|M0R7Z0_RAT;sp|B2GUV7|IF2P_RAT	ENSRNOG00000023356;ENSRNOG00000046621	AABR07043748.1;Eif5b	2
sp|O08838|AMPH_RAT;tr|A0A0G2JX32|A0A0G2JX32_RAT;tr|F1LPP0|F1LPP0_RAT;tr|A0A0G2K5Z4|A0A0G2K5Z4_RAT	ENSRNOG00000012490	AABR07027870.1;Amph	2
tr|Q6IMX8|Q6IMX8_RAT;sp|O55171|ACOT2_RAT;sp|O88267|ACOT1_RAT;tr|A0A0G2K7Z3|A0A0G2K7Z3_RAT	ENSRNOG00000010134;ENSRNOG00000055221	Acot1;Acot2	2
sp|P01946|HBA_RAT	ENSRNOG00000029886;ENSRNOG00000047321	Hba-a1;Hba-a2	2
tr|D3ZHV3|D3ZHV3_RAT;sp|P04355|MT2_RAT	ENSRNOG00000028841;ENSRNOG00000043098	Mt1m;Mt2A	2
tr|A0A0H2UHQ8|A0A0H2UHQ8_RAT;tr|D3ZFA8|D3ZFA8_RAT;sp|P04644|RS17_RAT;tr|D3ZHU9|D3ZHU9_RAT;tr|D3ZKG6|D3ZKG6_RAT	ENSRNOG00000019106;ENSRNOG00000032765;ENSRNOG00000045885;ENSRNOG00000048927	AABR07018533.1;AABR07068536.1;LOC100365810;Rps17	4
tr|M0R5J4|M0R5J4_RAT;sp|P04764|ENOA_RAT	ENSRNOG00000017895;ENSRNOG00000028543	AABR07052523.1;Eno1	2
sp|P04797|G3P_RAT;tr|M0R590|M0R590_RAT;tr|M0R660|M0R660_RAT	ENSRNOG00000018630;ENSRNOG00000050630	AABR07070043.1;Gapdh;LOC108351137	3
sp|P04897|GNAI2_RAT;sp|P10824|GNAI1_RAT	ENSRNOG00000016592;ENSRNOG00000057096	Gnai1;Gnai2	2
sp|P05712|RAB2A_RAT;tr|F1LP82|F1LP82_RAT;tr|Q3B7V5|Q3B7V5_RAT	ENSRNOG00000005963;ENSRNOG00000012488	Rab2a;Rab2b	2
tr|A0A0G2JXC3|A0A0G2JXC3_RAT;sp|P05765|RS21_RAT;tr|D3ZSE0|D3ZSE0_RAT	ENSRNOG00000033916;ENSRNOG00000060449	AC141489.1;Rps21	2
sp|P06302|PTMA_RAT	ENSRNOG00000018584;ENSRNOG00000025731	LOC100359583;Ptma	2
sp|P07871|THIKB_RAT;tr|F1LPD6|F1LPD6_RAT;sp|P21775|THIKA_RAT;sp|P21775-2|THIKA_RAT	ENSRNOG00000032908	Acaa1a;Acaa1b	2
tr|A0A0G2JW12|A0A0G2JW12_RAT;sp|P08649|CO4_RAT;tr|M0RB00|M0RB00_RAT;tr|F1LNM4|F1LNM4_RAT;tr|A0A0G2JV52|A0A0G2JV52_RAT;tr|Q6MG90|Q6MG90_RAT	ENSRNOG00000030729;ENSRNOG00000047657	C4a;C4b	2
sp|P09216|KPCE_RAT;tr|A0A0G2JXV8|A0A0G2JXV8_RAT	ENSRNOG00000015603;ENSRNOG00000060463	AABR07062799.2;Prkce	2
sp|P09895|RL5_RAT;tr|D3ZHP8|D3ZHP8_RAT	ENSRNOG00000023529;ENSRNOG00000037220	AABR07031089.1;Rpl5	2
tr|A0A0A0MXW3|A0A0A0MXW3_RAT;tr|D4AEC0|D4AEC0_RAT;sp|P0C0S7|H2AZ_RAT	ENSRNOG00000010306;ENSRNOG00000052275	H2az1;H2az2	2
tr|D4ACV3|D4ACV3_RAT;sp|P0CC09|H2A2A_RAT	ENSRNOG00000047898;ENSRNOG00000052555	Hist2h2aa2;Hist2h2aa3	2
sp|P0DMW1|HS71B_RAT;sp|P0DMW0|HS71A_RAT		Hspa1a;Hspa1b	2
sp|P0DP31|CALM3_RAT;sp|P0DP30|CALM2_RAT;sp|P0DP29|CALM1_RAT;tr|D4ABV5|D4ABV5_RAT	ENSRNOG00000004060;ENSRNOG00000016770;ENSRNOG00000030871	Calm1;Calm2;Calm3	3
sp|P10111|PPIA_RAT;tr|A0A0G2K1P0|A0A0G2K1P0_RAT;tr|A0A0G2K2E4|A0A0G2K2E4_RAT	ENSRNOG00000027864;ENSRNOG00000031045;ENSRNOG00000055068	LOC100911252;Ppia;Ppial4d	3
sp|P10959|EST1C_RAT;tr|D3ZGK7|D3ZGK7_RAT	ENSRNOG00000015438	Ces1c;Ces1f;LOC501233	3
sp|P11517|HBB2_RAT	ENSRNOG00000047098;ENSRNOG00000061299	Hbb-bs;LOC100134871	2
sp|P12711|ADHX_RAT;tr|Q7TQ90|Q7TQ90_RAT	ENSRNOG00000046357	Adh4;Adh5	2
tr|Q6PDV6|Q6PDV6_RAT;sp|P13471|RS14_RAT	ENSRNOG00000018774	LOC100911847;Rps14	2
sp|P15999|ATPA_RAT;tr|F1LP05|F1LP05_RAT;tr|A0A0G2K099|A0A0G2K099_RAT	ENSRNOG00000017032;ENSRNOG00000054846	AABR07022393.1;Atp5f1a	2
tr|D4A6G6|D4A6G6_RAT;sp|P17074|RS19_RAT;tr|A0A0H2UI38|A0A0H2UI38_RAT;tr|F1M8C7|F1M8C7_RAT;tr|D3ZGN8|D3ZGN8_RAT;tr|F1M764|F1M764_RAT;tr|F1LYF3|F1LYF3_RAT;tr|D3ZUD7|D3ZUD7_RAT	ENSRNOG00000005430;ENSRNOG00000013292;ENSRNOG00000032482;ENSRNOG00000037897	AABR07029006.1;AABR07040944.1;AC117101.1;Rps19;Rps19l2	5
tr|A0A0G2JXD0|A0A0G2JXD0_RAT;sp|P17077|RL9_RAT;tr|M0RBD4|M0RBD4_RAT	ENSRNOG00000026716;ENSRNOG00000028449;ENSRNOG00000030476;ENSRNOG00000052909;ENSRNOG00000061320	AABR07036746.1;LOC100360449;LOC100364457;LOC103692829;Rpl9	5
sp|P18395|CSDE1_RAT	ENSRNOG00000046533;ENSRNOG00000061058	Csde1;LOC100364335	2
sp|P18422|PSA3_RAT	ENSRNOG00000007851	Psma3;Psma3l	2
tr|A0A0G2JSW0|A0A0G2JSW0_RAT;sp|P18666|ML12B_RAT;sp|P13832|MRLCA_RAT;tr|B0BMS8|B0BMS8_RAT	ENSRNOG00000015278;ENSRNOG00000015733;ENSRNOG00000020246	Myl12a;Myl12b;Myl9	3
sp|P19944|RLA1_RAT;tr|A0A0H2UHJ3|A0A0H2UHJ3_RAT	ENSRNOG00000011955;ENSRNOG00000013874	AABR07026997.1;LOC100360522;Rplp1	3
tr|M0RDR2|M0RDR2_RAT;tr|F1LP80|F1LP80_RAT;sp|P20156|VGF_RAT	ENSRNOG00000001416;ENSRNOG00000053620	AABR07051069.1;Vgf	2
sp|Q04970|RASN_RAT;sp|P20171|RASH_RAT;sp|P08644-2|RASK_RAT;sp|P08644|RASK_RAT	ENSRNOG00000009338;ENSRNOG00000016611;ENSRNOG00000023079	Hras;Kras;Nras	3
tr|F1LQS3|F1LQS3_RAT;sp|P21533|RL6_RAT;tr|A0A0G2KBA1|A0A0G2KBA1_RAT	ENSRNOG00000025936;ENSRNOG00000055942	AC120310.1;Rpl6	2
sp|P23358|RL12_RAT;tr|A0A140TAC5|A0A140TAC5_RAT;tr|M0R4B6|M0R4B6_RAT;tr|D3ZJE2|D3ZJE2_RAT		LOC102555453;Rpl12	2
sp|P24049|RL17_RAT;tr|A0A0H2UHQ1|A0A0H2UHQ1_RAT;tr|A0A0G2KB77|A0A0G2KB77_RAT;tr|F1LZX7|F1LZX7_RAT;tr|D3Z9G9|D3Z9G9_RAT	ENSRNOG00000018680;ENSRNOG00000022022;ENSRNOG00000029262	AABR07053166.1;AC128967.1;Rpl17	3
sp|P24090|FETUA_RAT;tr|F1LM19|F1LM19_RAT	ENSRNOG00000038370	AABR07034632.1;Ahsg	2
tr|F1LYI5|F1LYI5_RAT;tr|A0A0G2QC62|A0A0G2QC62_RAT;tr|M0R665|M0R665_RAT;sp|P25886|RL29_RAT;tr|D4A888|D4A888_RAT;tr|D3ZY63|D3ZY63_RAT;tr|D3Z8Q4|D3Z8Q4_RAT	ENSRNOG00000011138;ENSRNOG00000028320;ENSRNOG00000029594;ENSRNOG00000037172;ENSRNOG00000045666;ENSRNOG00000057505	AABR07015015.2;AABR07039651.1;AABR07043598.1;AABR07064000.1;AC132539.2;Rpl29	6
tr|A0A0U1RVI9|A0A0U1RVI9_RAT;sp|P27952|RS2_RAT;tr|D3ZT78|D3ZT78_RAT;tr|E9PT76|E9PT76_RAT;tr|A0A0G2KB28|A0A0G2KB28_RAT;tr|D3ZIY7|D3ZIY7_RAT	ENSRNOG00000003401;ENSRNOG00000014179;ENSRNOG00000020641;ENSRNOG00000022934;ENSRNOG00000030174;ENSRNOG00000033244	AABR07029195.1;AABR07042903.1;AABR07066818.1;AABR07069969.1;AC115384.1;Rps2	6
tr|A0A0G2JSL0|A0A0G2JSL0_RAT;sp|P28073|PSB6_RAT	ENSRNOG00000011827;ENSRNOG00000019551	LOC100360846;Psmb6	2
sp|P29314|RS9_RAT;tr|D3ZV50|D3ZV50_RAT;tr|A0A0G2K4C4|A0A0G2K4C4_RAT;tr|M0RB65|M0RB65_RAT	ENSRNOG00000039203;ENSRNOG00000058909	AABR07040892.1;Rps9;Rps9l1	3
sp|P30713|GSTT2_RAT;tr|A0A0G2K3C6|A0A0G2K3C6_RAT	ENSRNOG00000052415	Gstt2;LOC103694879	2
sp|P30904|MIF_RAT;tr|D3ZE63|D3ZE63_RAT		AC127887.1;Mif	2
sp|P35435|ATPG_RAT;tr|Q6PCU0|Q6PCU0_RAT;tr|Q6QI09|Q6QI09_RAT	ENSRNOG00000019223	Atp5f1c;Taf3	2
tr|Q66HM7|Q66HM7_RAT;sp|P38656|LA_RAT;tr|D3ZLH9|D3ZLH9_RAT	ENSRNOG00000007998;ENSRNOG00000011606	AABR07061825.1;Ssb	2
sp|P39069|KAD1_RAT;tr|A0A0G2K7Q6|A0A0G2K7Q6_RAT	ENSRNOG00000049056	AABR07051450.1;Ak1	2
tr|F1M2E9|F1M2E9_RAT;tr|D3ZD02|D3ZD02_RAT;tr|D3ZRM9|D3ZRM9_RAT;sp|P41123|RL13_RAT;tr|A0A0G2JYG9|A0A0G2JYG9_RAT	ENSRNOG00000015335;ENSRNOG00000029227;ENSRNOG00000059545	AABR07054469.1;AC114446.1;Rpl13	3
sp|P41243|MATK_RAT;sp|P32577|CSK_RAT	ENSRNOG00000019374;ENSRNOG00000020431	Csk;Matk	2
sp|P47727|CBR1_RAT;tr|M0R3X6|M0R3X6_RAT;tr|A0A0G2JSV2|A0A0G2JSV2_RAT;tr|A0A0G2K658|A0A0G2K658_RAT;tr|A0A096MJ24|A0A096MJ24_RAT	ENSRNOG00000049693;ENSRNOG00000049911	Cbr1;LOC102556347	2
sp|P48500|TPIS_RAT;tr|A0A0G2JWJ4|A0A0G2JWJ4_RAT;tr|A0A0G2JWU1|A0A0G2JWU1_RAT	ENSRNOG00000015290;ENSRNOG00000055222	AC094212.1;Tpi1	2
tr|Q6P727|Q6P727_RAT;tr|A0A0G2JYS4|A0A0G2JYS4_RAT;tr|D4A5V8|D4A5V8_RAT;sp|P49186-2|MK09_RAT;sp|P49186|MK09_RAT;tr|A0A0U1RRS7|A0A0U1RRS7_RAT;sp|P49187-2|MK10_RAT;tr|A0A0U1RVI2|A0A0U1RVI2_RAT;sp|P49187|MK10_RAT	ENSRNOG00000002079;ENSRNOG00000002823	Mapk10;Mapk9	2
sp|P50297|ARY1_RAT;tr|G3V9K9|G3V9K9_RAT;sp|P50298|ARY2_RAT	ENSRNOG00000014055;ENSRNOG00000049498	Nat1;Nat2	2
sp|P51583|PUR6_RAT;tr|F8WFR8|F8WFR8_RAT;tr|A0A0G2K5S4|A0A0G2K5S4_RAT	ENSRNOG00000002101;ENSRNOG00000056398	AABR07036855.1;Paics	2
sp|P54313|GBB2_RAT;sp|O35353|GBB4_RAT	ENSRNOG00000001409;ENSRNOG00000011070	Gnb2;Gnb4	2
sp|P60522|GBRL2_RAT	ENSRNOG00000019425	Gabarapl2;LOC100359937	2
tr|A0A0H2UHG7|A0A0H2UHG7_RAT;tr|D3ZZK1|D3ZZK1_RAT;sp|P60868|RS20_RAT;tr|A0A0G2K6L6|A0A0G2K6L6_RAT;tr|M0R566|M0R566_RAT;tr|A0A0G2K8W1|A0A0G2K8W1_RAT;tr|M0RB28|M0RB28_RAT;tr|M0R987|M0R987_RAT	ENSRNOG00000008555;ENSRNOG00000029341;ENSRNOG00000029627;ENSRNOG00000029843;ENSRNOG00000030345;ENSRNOG00000030426;ENSRNOG00000030596;ENSRNOG00000031205;ENSRNOG00000048426;ENSRNOG00000055526;ENSRNOG00000059138	AABR07036375.1;AABR07044509.1;AABR07070957.1;AC121204.2;AC126292.2;AC136584.1;LOC100359951;LOC100362149;LOC100362684;LOC100364116;Rps20	11
tr|A0A0G2JSV3|A0A0G2JSV3_RAT;sp|P60892|PRPS1_RAT;tr|M0RBK1|M0RBK1_RAT	ENSRNOG00000032513;ENSRNOG00000056011;ENSRNOG00000060262	LOC314140;Prps1;Prps1l1	3
tr|A0A0G2JV81|A0A0G2JV81_RAT;sp|P84079|ARF1_RAT;sp|P61206|ARF3_RAT;tr|A0A0G2K9H8|A0A0G2K9H8_RAT;tr|A0A0G2K4Q4|A0A0G2K4Q4_RAT;sp|P84082|ARF2_RAT	ENSRNOG00000004807;ENSRNOG00000054775;ENSRNOG00000057515;ENSRNOG00000060229	AABR07046136.1;Arf1;Arf2;Arf3;Fkbp11	5
sp|P61354|RL27_RAT;tr|D3ZTK5|D3ZTK5_RAT;tr|M0R7P0|M0R7P0_RAT	ENSRNOG00000020674;ENSRNOG00000033603;ENSRNOG00000053282;ENSRNOG00000060888	AABR07034315.1;AABR07070594.1;AABR07070689.2;Rpl27	4
sp|P61589|RHOA_RAT;tr|B2RYP0|B2RYP0_RAT;tr|A0A0G2K6E0|A0A0G2K6E0_RAT	ENSRNOG00000012630;ENSRNOG00000050519	Rhoa;Rhoc	2
tr|F1M2K3|F1M2K3_RAT;sp|P61959|SUMO2_RAT;tr|D4A7L5|D4A7L5_RAT	ENSRNOG00000003670;ENSRNOG00000039674	AABR07034657.1;Sumo2	2
sp|P62083|RS7_RAT	ENSRNOG00000008551;ENSRNOG00000027694	LOC100362830;Rps7	2
sp|P62243|RS8_RAT;tr|M0R7Q5|M0R7Q5_RAT;tr|D3ZIE1|D3ZIE1_RAT;tr|Q6TXJ0|Q6TXJ0_RAT	ENSRNOG00000007238;ENSRNOG00000054626	LOC297756;Rps8	2
sp|P62246|RS15A_RAT;tr|D3ZLL8|D3ZLL8_RAT;tr|A0A0G2K6I0|A0A0G2K6I0_RAT;tr|D3ZZC7|D3ZZC7_RAT;tr|A0A0G2JYA6|A0A0G2JYA6_RAT	ENSRNOG00000018320;ENSRNOG00000032877;ENSRNOG00000042940	AABR07072261.1;AC135389.1;Rps15a	3
sp|P62268|RS23_RAT;tr|F1LTW8|F1LTW8_RAT;tr|D4A9Q3|D4A9Q3_RAT	ENSRNOG00000016580;ENSRNOG00000029461;ENSRNOG00000034052	AABR07071482.2;AABR07072400.1;Rps23	3
tr|M0R5K9|M0R5K9_RAT;tr|A0A0H2UHT6|A0A0H2UHT6_RAT;tr|D3ZM33|D3ZM33_RAT;sp|P62271|RS18_RAT;tr|D3ZAU6|D3ZAU6_RAT	ENSRNOG00000028505;ENSRNOG00000030107;ENSRNOG00000032944;ENSRNOG00000033152;ENSRNOG00000033451	AABR07042892.1;AABR07049320.1;AABR07049329.1;Rps18;Rps18l1	5
sp|P62278|RS13_RAT;tr|M0RCY2|M0RCY2_RAT	ENSRNOG00000028021;ENSRNOG00000048698	AABR07048031.1;LOC684988;Rps13	3
tr|F1M013|F1M013_RAT;sp|P62425|RL7A_RAT;tr|D3ZU22|D3ZU22_RAT;tr|D3ZPL5|D3ZPL5_RAT;tr|D3ZJH5|D3ZJH5_RAT;tr|M0R3M3|M0R3M3_RAT;tr|D4A6B9|D4A6B9_RAT	ENSRNOG00000028826;ENSRNOG00000029423;ENSRNOG00000031902;ENSRNOG00000033843;ENSRNOG00000047737;ENSRNOG00000049097	AABR07007121.1;AABR07027819.1;AABR07052519.1;AC128901.1;Rpl7a	5
sp|P62501|T22D1_RAT;tr|D3Z8M8|D3Z8M8_RAT;tr|A0A0G2K4L6|A0A0G2K4L6_RAT;tr|D3ZDW3|D3ZDW3_RAT	ENSRNOG00000001030;ENSRNOG00000038044	Tsc22d1;Tsc22d2	2
sp|P62630|EF1A1_RAT;tr|M0R757|M0R757_RAT;tr|F1M6C2|F1M6C2_RAT	ENSRNOG00000009439;ENSRNOG00000029996	AABR07054368.1;Eef1a1	2
tr|X1WI37|X1WI37_RAT;sp|P62703|RS4X_RAT;tr|A0A0H2UHX3|A0A0H2UHX3_RAT;tr|D3ZX01|D3ZX01_RAT	ENSRNOG00000003201;ENSRNOG00000031041	Rps4x;Rps4y2	2
sp|P62718|RL18A_RAT;tr|F1M0K6|F1M0K6_RAT	ENSRNOG00000018795;ENSRNOG00000042547	AABR07001902.1;Rpl18a	2
tr|A0A0G2K4M6|A0A0G2K4M6_RAT;sp|P63269|ACTH_RAT;sp|P62738|ACTA_RAT	ENSRNOG00000029401;ENSRNOG00000058039	Acta2;Actg2	2
sp|P62804|H4_RAT		Hist1h2ao;Hist1h4b;Hist1h4m;Hist2h4	4
sp|P62828|RAN_RAT;tr|Q66H11|Q66H11_RAT;sp|Q8K586|RANT_RAT	ENSRNOG00000000938;ENSRNOG00000031013;ENSRNOG00000032913	Ran;Rasl2-9;RGD1306195	3
sp|P62836|RAP1A_RAT;sp|Q62636|RAP1B_RAT	ENSRNOG00000007048;ENSRNOG00000032463	Rap1a;Rap1b	2
tr|A0A0H2UHU0|A0A0H2UHU0_RAT;sp|P62853|RS25_RAT;tr|D4AE10|D4AE10_RAT;tr|F1M6F4|F1M6F4_RAT;tr|M0R763|M0R763_RAT;tr|D3ZCH5|D3ZCH5_RAT	ENSRNOG00000013191;ENSRNOG00000027503;ENSRNOG00000029737;ENSRNOG00000031703;ENSRNOG00000047151;ENSRNOG00000055406	AABR07050701.1;AABR07057902.1;AABR07061383.1;AABR07063959.1;AABR07071294.1;AABR07073045.1;Rps25	7
tr|D3Z8D7|D3Z8D7_RAT;tr|A0A0G2K743|A0A0G2K743_RAT;sp|P62856|RS26_RAT;tr|D3ZJ54|D3ZJ54_RAT;tr|A0A0G2JY64|A0A0G2JY64_RAT	ENSRNOG00000029512;ENSRNOG00000056532	AC126292.3;LOC100360508;LOC100361854;Rps26	4
sp|P62870|ELOB_RAT;tr|A0A140TA99|A0A140TA99_RAT;tr|F1M937|F1M937_RAT	ENSRNOG00000004814;ENSRNOG00000033199	AABR07068955.1;Elob	2
sp|P62890|RL30_RAT;tr|A0A0G2K5E6|A0A0G2K5E6_RAT;tr|M0RD99|M0RD99_RAT	ENSRNOG00000005975;ENSRNOG00000021406;ENSRNOG00000032825;ENSRNOG00000057677	LOC100362027;LOC108351936;Rpl30;Rpl30l1	4
tr|D3ZKU5|D3ZKU5_RAT;sp|P62902|RL31_RAT;tr|D3ZX87|D3ZX87_RAT;tr|D3ZK34|D3ZK34_RAT;tr|D3ZU04|D3ZU04_RAT;tr|D3Z8W1|D3Z8W1_RAT;tr|A0A0G2K7E3|A0A0G2K7E3_RAT;tr|D4ACQ2|D4ACQ2_RAT;tr|D4ABZ9|D4ABZ9_RAT;tr|D3ZVY6|D3ZVY6_RAT;tr|D3ZVF5|D3ZVF5_RAT;tr|D3ZZ60|D3ZZ60_RAT	ENSRNOG00000013508;ENSRNOG00000025536;ENSRNOG00000029278;ENSRNOG00000029926;ENSRNOG00000030278;ENSRNOG00000030296;ENSRNOG00000031313;ENSRNOG00000033024;ENSRNOG00000039487;ENSRNOG00000050226;ENSRNOG00000050666	AABR07017576.1;AABR07018331.1;AABR07021008.1;AABR07031947.1;AABR07032277.1;AABR07056668.1;AABR07059675.1;AABR07071195.1;AC099453.1;AC103024.1;Rpl31	11
sp|P62909|RS3_RAT;tr|D3ZVH2|D3ZVH2_RAT	ENSRNOG00000007605;ENSRNOG00000017418	AABR07052430.1;Rps3	2
sp|P62912|RL32_RAT;tr|D4A412|D4A412_RAT	ENSRNOG00000008516;ENSRNOG00000010746	AABR07049516.1;Rpl32	2
tr|D4A6W6|D4A6W6_RAT;sp|P62919|RL8_RAT		AC129049.1;LOC100360117;Rpl8	3
sp|P62959|HINT1_RAT;tr|D4A269|D4A269_RAT	ENSRNOG00000000622;ENSRNOG00000005630	AABR07060778.1;Hint1	2
tr|D3ZEV0|D3ZEV0_RAT;sp|P62961|YBOX1_RAT;tr|Q3ZAV2|Q3ZAV2_RAT;tr|D4A0L4|D4A0L4_RAT;sp|Q62764-2|YBOX3_RAT;tr|F1MA18|F1MA18_RAT;sp|Q62764|YBOX3_RAT	ENSRNOG00000005480;ENSRNOG00000023786	Ybx1;Ybx3	2
sp|P62982|RS27A_RAT;sp|P62986|RL40_RAT;tr|F1LU69|F1LU69_RAT;sp|P0CG51|UBB_RAT;tr|F1LML2|F1LML2_RAT;sp|Q63429|UBC_RAT	ENSRNOG00000004426;ENSRNOG00000019974;ENSRNOG00000057823	Rps27a;Uba52;Ubc	3
sp|P63018|HSP7C_RAT;tr|M0RCB1|M0RCB1_RAT;tr|D4A4S3|D4A4S3_RAT;tr|F1LZI1|F1LZI1_RAT;tr|M0R8M9|M0R8M9_RAT;tr|A0A0G2JVI3|A0A0G2JVI3_RAT	ENSRNOG00000032585;ENSRNOG00000034066;ENSRNOG00000034093;ENSRNOG00000061099	AABR07011951.1;AABR07033324.1;AABR07048992.1;Hspa8	4
tr|A0A0H2UHV6|A0A0H2UHV6_RAT;sp|P63100|CANB1_RAT;sp|P63100-2|CANB1_RAT;tr|A0A0G2K4H3|A0A0G2K4H3_RAT	ENSRNOG00000043210;ENSRNOG00000057321	AABR07016428.1;Ppp3r1	2
tr|D3ZCR3|D3ZCR3_RAT;tr|A0A0G2K6P4|A0A0G2K6P4_RAT;sp|P63159|HMGB1_RAT;tr|D3ZXR5|D3ZXR5_RAT	ENSRNOG00000034130;ENSRNOG00000051482;ENSRNOG00000058908	Hmg1l1;Hmgb1;LOC108349189	3
sp|P63170|DYL1_RAT;tr|A0A0G2JU43|A0A0G2JU43_RAT	ENSRNOG00000011222;ENSRNOG00000052174	Dynll1;LOC100361920	2
tr|D4AD70|D4AD70_RAT;sp|P63174|RL38_RAT;tr|D3ZZH2|D3ZZH2_RAT	ENSRNOG00000030747;ENSRNOG00000032847;ENSRNOG00000033484;ENSRNOG00000048701	AABR07039377.1;AABR07060145.1;LOC685963;LOC690468;Rpl38	5
sp|P63259|ACTG_RAT	ENSRNOG00000036701;ENSRNOG00000053452	Actg1;LOC100361457	2
sp|P63322|RALA_RAT;tr|F1LQ62|F1LQ62_RAT;sp|P36860|RALB_RAT	ENSRNOG00000002440;ENSRNOG00000013454	Rala;Ralb	2
tr|A0A0H2UI18|A0A0H2UI18_RAT;tr|F1LT36|F1LT36_RAT;sp|P63326|RS10_RAT;tr|D3ZJY5|D3ZJY5_RAT		AABR07017250.1;Rps10;Rps10l1	3
sp|P68035|ACTC_RAT;sp|P68136|ACTS_RAT	ENSRNOG00000008536;ENSRNOG00000017786	Acta1;Actc1	2
sp|P68370|TBA1A_RAT;sp|Q68FR8|TBA3_RAT	ENSRNOG00000031707;ENSRNOG00000032967;ENSRNOG00000060728	Tuba1a;Tuba3a;Tuba3b	3
sp|P81795|IF2G_RAT;sp|C9WPN6|IF2H_RAT	ENSRNOG00000060048;ENSRNOG00000060793	Eif2s3;Eif2s3y	2
sp|P83941|ELOC_RAT;tr|A0A096MIY6|A0A096MIY6_RAT;tr|A0A0G2K2A0|A0A0G2K2A0_RAT	ENSRNOG00000031730;ENSRNOG00000051063;ENSRNOG00000061371	AABR07035541.3;AABR07044940.1;Eloc	3
sp|P84100|RL19_RAT;tr|F1M5A9|F1M5A9_RAT	ENSRNOG00000004741;ENSRNOG00000005826	RGD1562420;Rpl19	2
tr|D3ZK97|D3ZK97_RAT;sp|P84245|H33_RAT;tr|A0A0G2K0N8|A0A0G2K0N8_RAT	ENSRNOG00000003220;ENSRNOG00000006532;ENSRNOG00000032401;ENSRNOG00000045778	AC119603.1;H3f3a;H3f3b;H3f3c	4
sp|P85968|6PGD_RAT;tr|A0A0G2K7Q8|A0A0G2K7Q8_RAT	ENSRNOG00000057626	Kif1b;Pgd	2
sp|Q0VGK0|GBRL1_RAT;sp|P60517|GBRAP_RAT	ENSRNOG00000017417;ENSRNOG00000053362	Gabarap;Gabarapl1	2
sp|Q27W02|MGN_RAT;tr|F1M0X6|F1M0X6_RAT	ENSRNOG00000010316;ENSRNOG00000012778	Magoh;Magohb	2
tr|M0R8A4|M0R8A4_RAT;sp|Q3B8Q0|MARE2_RAT;tr|M0R7M8|M0R7M8_RAT	ENSRNOG00000047261;ENSRNOG00000049681	AABR07031445.1;AABR07031491.2;Mapre2	3
tr|D4A1V7|D4A1V7_RAT;sp|Q3T1J9|MOB1A_RAT	ENSRNOG00000010996;ENSRNOG00000059474	Mob1a;Mob1b	2
sp|Q4AEF8|COPG1_RAT;tr|A0A0G2K1F3|A0A0G2K1F3_RAT	ENSRNOG00000010474	Copg1;Hmces	2
sp|Q4KLL0|TCEA1_RAT	ENSRNOG00000022323	LOC498453;Tcea1	2
tr|A0A1W2Q6F8|A0A1W2Q6F8_RAT;sp|Q561S0|NDUAA_RAT	ENSRNOG00000016470;ENSRNOG00000062245	Ndufa10;Ndufa10l1	2
sp|Q5BK20|JUPI2_RAT;tr|D3ZDL0|D3ZDL0_RAT	ENSRNOG00000000607;ENSRNOG00000024661	Jpt2;RGD1559903	2
sp|Q5HZV9|PP1R7_RAT;tr|R9PXV7|R9PXV7_RAT	ENSRNOG00000016974	AABR07068351.1;Ppp1r7	2
sp|Q5HZY2|SAR1B_RAT;tr|Q6AY18|Q6AY18_RAT	ENSRNOG00000004820	Sar1a;Sar1b	2
sp|Q62844|FYN_RAT;tr|A0A0G2K2E3|A0A0G2K2E3_RAT;tr|A0A096MKC1|A0A096MKC1_RAT;sp|F1LM93|YES_RAT	ENSRNOG00000000596;ENSRNOG00000037227	Fyn;Yes1	2
tr|F1LQT3|F1LQT3_RAT;tr|A0A0G2K5N6|A0A0G2K5N6_RAT;sp|Q62868|ROCK2_RAT;tr|D3ZN37|D3ZN37_RAT;tr|D4A5S0|D4A5S0_RAT;sp|Q63644|ROCK1_RAT	ENSRNOG00000004496;ENSRNOG00000031092	Rock1;Rock2	2
sp|Q63413|DX39B_RAT;tr|A0A0G2KAT4|A0A0G2KAT4_RAT;sp|Q5U216|DX39A_RAT	ENSRNOG00000000841;ENSRNOG00000004373	Ddx39a;Ddx39b	2
tr|F1LSW7|F1LSW7_RAT;sp|Q63507|RL14_RAT;tr|B5DEM5|B5DEM5_RAT;tr|Q6TUH8|Q6TUH8_RAT	ENSRNOG00000019007;ENSRNOG00000031061	LOC306079;Rpl14	2
sp|Q6B345|S10AB_RAT;tr|F1LYQ0|F1LYQ0_RAT	ENSRNOG00000010105;ENSRNOG00000040101	AABR07026805.2;S100a11	2
sp|Q6P791|LTOR1_RAT	ENSRNOG00000020016	Lamtor1;LOC100361543	2
sp|Q6PDV7|RL10_RAT;tr|D4A1P2|D4A1P2_RAT	ENSRNOG00000032720;ENSRNOG00000056765	Rpl10;Rpl10l	2
sp|Q6PEC0|AP4A_RAT;tr|D3ZH27|D3ZH27_RAT	ENSRNOG00000013110	LOC100910067;Nudt2	2
sp|Q6URK4-2|ROA3_RAT;tr|E9PSU5|E9PSU5_RAT;tr|D4A6A2|D4A6A2_RAT	ENSRNOG00000038905;ENSRNOG00000052968	AABR07048397.1;Hnrnpa3	2
sp|Q712U5|ARP19_RAT;sp|Q712U5-2|ARP19_RAT	ENSRNOG00000023086	Arpp19;LOC100360828	2
tr|M0RA26|M0RA26_RAT;sp|Q71TY3|RS27_RAT;sp|P24051|RS27L_RAT	ENSRNOG00000016961;ENSRNOG00000021159;ENSRNOG00000050473	LOC100362987;Rps27;Rps27l	3
sp|Q7M0E3|DEST_RAT;tr|D4A315|D4A315_RAT	ENSRNOG00000005924;ENSRNOG00000026891	AC093995.1;Dstn	2
sp|Q7TP17|U2AF4_RAT;tr|Q3KR55|Q3KR55_RAT	ENSRNOG00000024497;ENSRNOG00000045860	U2af1;U2af1l4	2
sp|Q8VIF7|SBP1_RAT;tr|F1LRJ9|F1LRJ9_RAT	ENSRNOG00000047158;ENSRNOG00000053812	LOC103689947;Selenbp1	2
tr|A0A0G2K9Y5|A0A0G2K9Y5_RAT;sp|Q99PS8|HRG_RAT;tr|A0A0G2K3G0|A0A0G2K3G0_RAT	ENSRNOG00000001809	Hrg;LOC681544	2
tr|A0A0G2K613|A0A0G2K613_RAT;sp|Q9EPH2|MRP_RAT	ENSRNOG00000009113;ENSRNOG00000054614	AABR07002779.1;Marcksl1	2
sp|Q9EPH8|PABP1_RAT;tr|A0A0G2JZS2|A0A0G2JZS2_RAT;tr|B5DF80|B5DF80_RAT	ENSRNOG00000008639;ENSRNOG00000017367	Pabpc1;Pabpc6	2
tr|A0A0G2JZ76|A0A0G2JZ76_RAT;sp|Q9JKC9-3|SYNRG_RAT;sp|Q9JKC9-2|SYNRG_RAT;sp|Q9JKC9-4|SYNRG_RAT;sp|Q9JKC9|SYNRG_RAT	ENSRNOG00000053814	AC105531.1;Synrg	2
tr|A0A0G2JY69|A0A0G2JY69_RAT;tr|G3V907|G3V907_RAT;sp|Q9QYU1|PEX19_RAT		LOC102548286;Pex19	2
sp|Q9R0I8|PI42A_RAT;tr|F1LX22|F1LX22_RAT	ENSRNOG00000016670	AABR07028769.1;Pip4k2a	2
tr|F1M556|F1M556_RAT;tr|F1LP21|F1LP21_RAT;sp|Q9WVA1|TIM8A_RAT;tr|D3ZV76|D3ZV76_RAT	ENSRNOG00000011226;ENSRNOG00000013835;ENSRNOG00000043480	AABR07071440.1;Timm8a1;Timm8a2	3
tr|A0A0G2JSX2|A0A0G2JSX2_RAT;sp|P01256|CALCA_RAT;tr|G3V7G7|G3V7G7_RAT;sp|P10093|CALCB_RAT	ENSRNOG00000011074;ENSRNOG00000011130	Calca;Calcb	2
tr|A0A0G2JTW9|A0A0G2JTW9_RAT	ENSRNOG00000047098;ENSRNOG00000061299	Hbb-b1;Hbb-bs;LOC100134871	3
tr|Q68FX3|Q68FX3_RAT;tr|A0A0G2K7X6|A0A0G2K7X6_RAT;tr|A0A0G2JY21|A0A0G2JY21_RAT;tr|A0A0G2JUH2|A0A0G2JUH2_RAT;tr|A0A0G2JZQ1|A0A0G2JZQ1_RAT	ENSRNOG00000018033	Ddx19a;Ddx19b	2
tr|A0A0G2JWP1|A0A0G2JWP1_RAT;tr|B4F7F1|B4F7F1_RAT;tr|A0A0G2K6F9|A0A0G2K6F9_RAT;tr|M0R6B9|M0R6B9_RAT	ENSRNOG00000048025;ENSRNOG00000050289	Cstf2;Cstf2t	2
tr|Q5FVM2|Q5FVM2_RAT;tr|A0A0G2JWZ2|A0A0G2JWZ2_RAT	ENSRNOG00000051344;ENSRNOG00000053448	AC123346.1;Psme3	2
tr|F1M9D6|F1M9D6_RAT;tr|A0A0G2JX93|A0A0G2JX93_RAT	ENSRNOG00000014079	Stat1;Stat4	2
tr|M0R4L7|M0R4L7_RAT;tr|G3V9C7|G3V9C7_RAT;tr|G3V8B3|G3V8B3_RAT;tr|D3ZWM5|D3ZWM5_RAT;tr|A0A0G2JXE0|A0A0G2JXE0_RAT;tr|D3ZNH4|D3ZNH4_RAT;tr|A0A0G2JXI9|A0A0G2JXI9_RAT;tr|D3ZLY9|D3ZLY9_RAT;sp|Q00715|H2B1_RAT;tr|D4A817|D4A817_RAT;tr|A0A0G2K7R1|A0A0G2K7R1_RAT;tr|M0RBQ5|M0RBQ5_RAT;tr|D3ZNZ9|D3ZNZ9_RAT;sp|Q00729|H2B1A_RAT	ENSRNOG00000016865;ENSRNOG00000021198;ENSRNOG00000031790;ENSRNOG00000043419;ENSRNOG00000045753;ENSRNOG00000047776;ENSRNOG00000053845;ENSRNOG00000054296;ENSRNOG00000055512;ENSRNOG00000058187;ENSRNOG00000058263;ENSRNOG00000059093;ENSRNOG00000059382;ENSRNOG00000059949;ENSRNOG00000060769	AABR07012583.2;H2bc1;H2bc12;H2bc9;H2bu1;Hist1h2bc;Hist1h2bd;Hist1h2bg;Hist1h2bl;Hist1h2bo;Hist1h2bq;Hist2h2be;Hist3h2ba;LOC100364835;LOC100365043;LOC100910200;LOC102549061;LOC684797	18
tr|D3ZHK8|D3ZHK8_RAT;tr|D3ZKL3|D3ZKL3_RAT;tr|A0A0G2K3Y6|A0A0G2K3Y6_RAT;tr|A0A0G2JY45|A0A0G2JY45_RAT;tr|D4AD99|D4AD99_RAT;tr|A0A0G2K520|A0A0G2K520_RAT	ENSRNOG00000020689;ENSRNOG00000033169	Cpeb3;Cpeb4	2
tr|A0A0G2K3A6|A0A0G2K3A6_RAT;tr|A0A0G2K290|A0A0G2K290_RAT	ENSRNOG00000048458;ENSRNOG00000056043;ENSRNOG00000056760;ENSRNOG00000058352	AABR07065656.8;AABR07065684.1;AABR07065699.4;AABR07065705.1	4
tr|D4A3I4|D4A3I4_RAT;tr|A0A0G2K4W2|A0A0G2K4W2_RAT	ENSRNOG00000008512;ENSRNOG00000024829	AABR07014804.1;Btf3l4	2
tr|A0A0G2K719|A0A0G2K719_RAT;tr|D3ZN21|D3ZN21_RAT	ENSRNOG00000002501;ENSRNOG00000023383	Ddx3x;Ddx3y	2
tr|A0A0G2K9Y0|A0A0G2K9Y0_RAT;tr|F1LPQ6|F1LPQ6_RAT;sp|P20759|IGHG1_RAT;tr|F1LN61|F1LN61_RAT;tr|A0A0G2K477|A0A0G2K477_RAT	ENSRNOG00000030332;ENSRNOG00000034190	Ighg1;Ighm	2
tr|F1M706|F1M706_RAT;tr|A0A140TAI6|A0A140TAI6_RAT;tr|D3ZZ95|D3ZZ95_RAT;tr|M0RCN1|M0RCN1_RAT;tr|D4A1Q0|D4A1Q0_RAT;sp|P39032|RL36_RAT;tr|D3ZJJ6|D3ZJJ6_RAT	ENSRNOG00000002340;ENSRNOG00000029560;ENSRNOG00000029988;ENSRNOG00000031947;ENSRNOG00000033473;ENSRNOG00000055777	AABR07007675.1;AABR07064980.1;AABR07071986.1;AABR07072272.1;LOC100361079;Rpl36	6
tr|B5DEL8|B5DEL8_RAT;tr|A0A0G2JZJ9|A0A0G2JZJ9_RAT	ENSRNOG00000026646;ENSRNOG00000029339;ENSRNOG00000052764	AABR07016779.1;LOC100363268;Ndufs5	3
tr|M0R8K2|M0R8K2_RAT;tr|B5DES0|B5DES0_RAT	ENSRNOG00000015844;ENSRNOG00000048758	Snrpd2;Snrpd2l	2
tr|D3ZCZ9|D3ZCZ9_RAT;sp|P52504|NDUS6_RAT		LOC679739;Ndufs6	2
tr|Q642E2|Q642E2_RAT;tr|D3ZJD3|D3ZJD3_RAT;tr|D3ZEI0|D3ZEI0_RAT;sp|P17702|RL28_RAT	ENSRNOG00000009240;ENSRNOG00000017127;ENSRNOG00000037673	AABR07016623.1;AABR07071891.1;Rpl28	3
tr|D3ZFY8|D3ZFY8_RAT	ENSRNOG00000025580	LOC679539;Ube2v1	2
tr|D3ZG07|D3ZG07_RAT	ENSRNOG00000030374;ENSRNOG00000049370	LOC100360750;Lsm6	2
tr|D3ZJ08|D3ZJ08_RAT;tr|M0RBX6|M0RBX6_RAT;sp|Q6LED0|H31_RAT		AABR07027811.2;H3c1;H3c13;Hist1h2ail1;Hist1h3b;Hist2h3c2;LOC102548682;LOC102549173	8
tr|F1M6L8|F1M6L8_RAT;tr|D3ZZW2|D3ZZW2_RAT;tr|D3ZP49|D3ZP49_RAT	ENSRNOG00000021723;ENSRNOG00000043400;ENSRNOG00000047225	AC139642.2;LOC100910678;Tma7	3
tr|D3ZSP1|D3ZSP1_RAT;tr|D4A8M5|D4A8M5_RAT;tr|F7ETL6|F7ETL6_RAT	ENSRNOG00000017086;ENSRNOG00000034206	AABR07054367.1;AC096024.2	2
tr|G3V6I9|G3V6I9_RAT;tr|D4A1Z2|D4A1Z2_RAT;sp|P12749|RL26_RAT;tr|M0R6L3|M0R6L3_RAT	ENSRNOG00000004214;ENSRNOG00000039783	AC094217.1;Rpl26	2
tr|D4AED6|D4AED6_RAT;tr|A0A0G2K8S3|A0A0G2K8S3_RAT;tr|F1M3Y3|F1M3Y3_RAT	ENSRNOG00000029425;ENSRNOG00000046700	AABR07021022.1;Mettl27	2
tr|F1LPG5|F1LPG5_RAT;tr|F1M7T1|F1M7T1_RAT;tr|D3ZQH7|D3ZQH7_RAT;tr|F1M7Z4|F1M7Z4_RAT;tr|D3ZV29|D3ZV29_RAT	ENSRNOG00000002721;ENSRNOG00000030089;ENSRNOG00000032733;ENSRNOG00000034289	AABR07002966.1;AABR07003235.2;AABR07014298.1;Ndufb4	4
tr|F1M5A4|F1M5A4_RAT;tr|D4A6T1|D4A6T1_RAT;tr|A0A0G2K0I1|A0A0G2K0I1_RAT	ENSRNOG00000017462;ENSRNOG00000017788	Katnal2;Spata5	2
tr|F1M7N7|F1M7N7_RAT;tr|A0A0G2JXA6|A0A0G2JXA6_RAT;tr|F1LYL8|F1LYL8_RAT	ENSRNOG00000002592;ENSRNOG00000013194	Rps6ka2;Rps6ka6	2
tr|F7EPH4|F7EPH4_RAT;tr|A0A0G2JUD2|A0A0G2JUD2_RAT	ENSRNOG00000000557	Ppa1;Sar1a	2
tr|M0R9Z5|M0R9Z5_RAT;tr|M0R567|M0R567_RAT;sp|Q5EIC4|I2BPL_RAT	ENSRNOG00000011026;ENSRNOG00000049900	Irf2bp2;Irf2bpl	2
tr|M0RBL8|M0RBL8_RAT	ENSRNOG00000046390;ENSRNOG00000049020	Tceal3;Tceal6	2
tr|O88753|O88753_RAT;tr|O88754|O88754_RAT	ENSRNOG00000030784;ENSRNOG00000030879	Hbe2;Hbg1	2
tr|Q5U3Y8|Q5U3Y8_RAT;tr|M0R5M7|M0R5M7_RAT;tr|A0A0G2K5C5|A0A0G2K5C5_RAT	ENSRNOG00000016912;ENSRNOG00000029243;ENSRNOG00000031864	AABR07021871.1;AABR07058578.1;Btf3	3
tr|Q6PDV8|Q6PDV8_RAT;sp|P47198|RL22_RAT	ENSRNOG00000011104;ENSRNOG00000028747	LOC100360057;Rpl22	2
tr|Q6PDW1|Q6PDW1_RAT;sp|P63324|RS12_RAT;tr|D3ZHB3|D3ZHB3_RAT;tr|D3ZG05|D3ZG05_RAT	ENSRNOG00000016411;ENSRNOG00000020093;ENSRNOG00000046395	AABR07006576.1;LOC100360573;Rps12	3
tr|D4ACV3|D4ACV3_RAT;tr|M0RDM4|M0RDM4_RAT;sp|A9UMV8|H2AJ_RAT;tr|Q6I8Q6|Q6I8Q6_RAT;tr|M0RCL5|M0RCL5_RAT;tr|G3V9C0|G3V9C0_RAT;tr|D3ZVK7|D3ZVK7_RAT;sp|Q64598|H2A1F_RAT;sp|Q4FZT6|H2A3_RAT;sp|Q00728|H2A4_RAT;sp|P0CC09|H2A2A_RAT;sp|P0C170|H2A1E_RAT;sp|P0C169|H2A1C_RAT;sp|P02262|H2A1_RAT		H2ac1;H2ac4;H2aj;Hist1h2ac;Hist1h2af;Hist1h2ah;Hist1h2ai;hist1h2ail2;Hist1h2an;Hist2h2aa2;Hist2h2aa3;Hist3h2a;LOC100910554;LOC103690190;LOC684773	15
tr|A0A0H2UHV4|A0A0H2UHV4_RAT;tr|M0R7Z0|M0R7Z0_RAT;sp|B2GUV7|IF2P_RAT	ENSRNOG00000023356;ENSRNOG00000046621	AABR07043748.1;Eif5b	2
tr|M0R5F8|M0R5F8_RAT;sp|B4F777|HMGN5_RAT	ENSRNOG00000029078;ENSRNOG00000049192	Hmgn5;Hmgn5b	2
tr|A0A140TAI8|A0A140TAI8_RAT;sp|B5DFN2|SAHH2_RAT;tr|D3ZWL6|D3ZWL6_RAT	ENSRNOG00000018569;ENSRNOG00000039300	Ahcyl1;Ahcyl2	2
sp|D4A1R8|CPNE1_RAT	ENSRNOG00000019723;ENSRNOG00000050864	Cpne1;Rbm12	2
sp|D4AAZ6|RL37A_RAT;tr|A0A0H2UHU1|A0A0H2UHU1_RAT;sp|P61515|RL37P_RAT;tr|D4A7B1|D4A7B1_RAT;tr|D4A829|D4A829_RAT	ENSRNOG00000028883;ENSRNOG00000032964	AABR07045454.1;AABR07072078.1;Rpl37a	3
sp|F1LM93|YES_RAT;tr|Q6AXQ3|Q6AXQ3_RAT;tr|A0A0G2K2V7|A0A0G2K2V7_RAT;sp|Q9WUD9|SRC_RAT;sp|Q9WUD9-2|SRC_RAT	ENSRNOG00000009495;ENSRNOG00000037227	Src;Yes1	2
sp|M0RC99|RAB5A_RAT	ENSRNOG00000057056	Rab5a;Rab5al1	2
tr|A0A0G2K5Z4|A0A0G2K5Z4_RAT;tr|A0A0G2JX32|A0A0G2JX32_RAT;tr|F1LPP0|F1LPP0_RAT;sp|O08838|AMPH_RAT	ENSRNOG00000012490	AABR07027870.1;Amph	2
tr|A0A0G2JZR4|A0A0G2JZR4_RAT;sp|O35509|RB11B_RAT;sp|P62494|RB11A_RAT	ENSRNOG00000007648;ENSRNOG00000011302	Rab11a;Rab11b	2
sp|O88267|ACOT1_RAT;tr|Q6IMX8|Q6IMX8_RAT;sp|O55171|ACOT2_RAT;tr|A0A0G2K7Z3|A0A0G2K7Z3_RAT;tr|D3ZIQ1|D3ZIQ1_RAT;tr|A1A5R4|A1A5R4_RAT	ENSRNOG00000010134;ENSRNOG00000032508;ENSRNOG00000046864;ENSRNOG00000055221	Acot1;Acot2;Acot4;Acot5	4
tr|D3Z900|D3Z900_RAT;sp|O88994|MARC2_RAT;tr|M0R6N2|M0R6N2_RAT	ENSRNOG00000037850	LOC100910481;Mtarc2	2
sp|P00502|GSTA1_RAT;tr|F7F2H5|F7F2H5_RAT;tr|Q4FZZ3|Q4FZZ3_RAT;sp|P04903|GSTA2_RAT		Gsta2;Gsta5	2
sp|P01946|HBA_RAT;tr|A0A0G2JSV6|A0A0G2JSV6_RAT	ENSRNOG00000029886;ENSRNOG00000047321	Hba-a1;Hba-a2	2
sp|P02793|FRIL1_RAT;sp|Q7TP54|RIPR2_RAT;tr|M0R6L9|M0R6L9_RAT;tr|M0R5T8|M0R5T8_RAT;tr|M0R597|M0R597_RAT;tr|M0RCS3|M0RCS3_RAT;tr|F1M5T1|F1M5T1_RAT	ENSRNOG00000004662;ENSRNOG00000018804;ENSRNOG00000020843;ENSRNOG00000029082;ENSRNOG00000031506;ENSRNOG00000031540;ENSRNOG00000033776;ENSRNOG00000034150	AABR07005031.1;AABR07041778.1;AC115277.1;Ftl1;LOC100359668;LOC100360087;LOC100362384;Ripor2	8
tr|A0A0H2UHQ8|A0A0H2UHQ8_RAT;tr|D3ZFA8|D3ZFA8_RAT;sp|P04644|RS17_RAT;tr|D3ZKG6|D3ZKG6_RAT;tr|D3ZHU9|D3ZHU9_RAT	ENSRNOG00000019106;ENSRNOG00000032765;ENSRNOG00000045885;ENSRNOG00000048927	AABR07018533.1;AABR07068536.1;LOC100365810;Rps17	4
tr|D4A771|D4A771_RAT;tr|D3ZZN4|D3ZZN4_RAT;sp|P04646|RL35A_RAT;tr|F1M0T2|F1M0T2_RAT;tr|A0A096P6M4|A0A096P6M4_RAT	ENSRNOG00000030217;ENSRNOG00000031694;ENSRNOG00000032303;ENSRNOG00000033058;ENSRNOG00000033625;ENSRNOG00000047557;ENSRNOG00000049536	AABR07027015.1;AABR07030122.1;AABR07053188.1;AABR07064810.1;LOC103690996;LOC108349682;Rpl35al1	7
tr|M0R5J4|M0R5J4_RAT;sp|P04764|ENOA_RAT	ENSRNOG00000017895;ENSRNOG00000028543	AABR07052523.1;Eno1	2
sp|P04797|G3P_RAT;tr|M0R590|M0R590_RAT;tr|D3ZGY4|D3ZGY4_RAT;tr|M0R660|M0R660_RAT;tr|E9PTV9|E9PTV9_RAT	ENSRNOG00000018630;ENSRNOG00000033057;ENSRNOG00000048704;ENSRNOG00000050630	AABR07025010.1;AABR07032392.1;AABR07070043.1;Gapdh;LOC108351137	5
sp|P04904|GSTA3_RAT;tr|A0A0G2JVT2|A0A0G2JVT2_RAT;sp|P46418|GSTA5_RAT	ENSRNOG00000013484;ENSRNOG00000056847	Gsta1;Gsta3	2
tr|A0A0G2JXC3|A0A0G2JXC3_RAT;tr|D3ZSE0|D3ZSE0_RAT;sp|P05765|RS21_RAT	ENSRNOG00000033916;ENSRNOG00000060449	AC141489.1;Rps21	2
sp|P06302|PTMA_RAT	ENSRNOG00000018584;ENSRNOG00000025731	LOC100359583;Ptma	2
sp|P06686|AT1A2_RAT;sp|P06687|AT1A3_RAT	ENSRNOG00000007290;ENSRNOG00000020263	Atp1a2;Atp1a3	2
sp|P06757|ADH1_RAT;tr|A0A0G2JW98|A0A0G2JW98_RAT	ENSRNOG00000012436	Adh1;Adh6	2
sp|P15791-5|KCC2D_RAT;sp|P11730-3|KCC2G_RAT;sp|P15791-7|KCC2D_RAT;sp|P15791-2|KCC2D_RAT;sp|P15791-3|KCC2D_RAT;sp|P15791-6|KCC2D_RAT;sp|P11730-2|KCC2G_RAT;sp|P15791-4|KCC2D_RAT;sp|P11730|KCC2G_RAT;tr|F1M3F8|F1M3F8_RAT;sp|P15791|KCC2D_RAT;tr|G3V9G3|G3V9G3_RAT;sp|P08413|KCC2B_RAT;tr|F1LNI8|F1LNI8_RAT;tr|F1LUE2|F1LUE2_RAT;sp|P11275|KCC2A_RAT	ENSRNOG00000009783;ENSRNOG00000011589;ENSRNOG00000018712;ENSRNOG00000052080	Camk2a;Camk2b;Camk2d;Camk2g	4
tr|A0A0G2JV52|A0A0G2JV52_RAT;tr|F1LNM4|F1LNM4_RAT;tr|M0RB00|M0RB00_RAT;tr|Q6MG90|Q6MG90_RAT;tr|A0A0G2JW12|A0A0G2JW12_RAT;sp|P08649|CO4_RAT	ENSRNOG00000030729;ENSRNOG00000047657	C4a;C4b	2
sp|P09895|RL5_RAT;tr|D3ZHP8|D3ZHP8_RAT	ENSRNOG00000023529;ENSRNOG00000037220	AABR07031089.1;Rpl5	2
tr|A0A0A0MXW3|A0A0A0MXW3_RAT;tr|D4AEC0|D4AEC0_RAT;sp|P0C0S7|H2AZ_RAT	ENSRNOG00000010306;ENSRNOG00000052275	H2az1;H2az2	2
sp|P0DMW1|HS71B_RAT;sp|P0DMW0|HS71A_RAT		Hspa1a;Hspa1b	2
sp|P0DP31|CALM3_RAT;sp|P0DP30|CALM2_RAT;sp|P0DP29|CALM1_RAT;tr|D4ABV5|D4ABV5_RAT	ENSRNOG00000004060;ENSRNOG00000016770;ENSRNOG00000030871	Calm1;Calm2;Calm3	3
sp|P10111|PPIA_RAT;tr|A0A0G2K1P0|A0A0G2K1P0_RAT;tr|A0A0G2K2E4|A0A0G2K2E4_RAT	ENSRNOG00000027864;ENSRNOG00000031045;ENSRNOG00000055068	LOC100911252;Ppia;Ppial4d	3
sp|P10959|EST1C_RAT;tr|D3ZGK7|D3ZGK7_RAT	ENSRNOG00000015438	Ces1c;Ces1f;LOC501233	3
tr|F1LQ14|F1LQ14_RAT;tr|D4A4W9|D4A4W9_RAT;tr|B2RZD4|B2RZD4_RAT;sp|P11250|RL34_RAT	ENSRNOG00000016387;ENSRNOG00000038045	AC128960.1;Rpl34	2
sp|P11505-5|AT2B1_RAT;sp|P11505-2|AT2B1_RAT;sp|P11505-6|AT2B1_RAT;sp|P11505|AT2B1_RAT;sp|P11505-4|AT2B1_RAT;sp|P11505-1|AT2B1_RAT;sp|P11506-5|AT2B2_RAT;sp|P11506-12|AT2B2_RAT;sp|P11506-3|AT2B2_RAT;sp|P11506-10|AT2B2_RAT;sp|P11506-4|AT2B2_RAT;sp|P11506-11|AT2B2_RAT;sp|P11506-14|AT2B2_RAT;tr|D4A8B3|D4A8B3_RAT;sp|P11506-2|AT2B2_RAT;sp|P11506-9|AT2B2_RAT;sp|P11506-8|AT2B2_RAT;sp|P11506-6|AT2B2_RAT;sp…	ENSRNOG00000004026;ENSRNOG00000030269	Atp2b1;Atp2b2	2
sp|P11517|HBB2_RAT	ENSRNOG00000047098;ENSRNOG00000061299	Hbb-bs;LOC100134871	2
sp|P12711|ADHX_RAT;tr|Q7TQ90|Q7TQ90_RAT	ENSRNOG00000046357	Adh4;Adh5	2
tr|G3V6I9|G3V6I9_RAT;sp|P12749|RL26_RAT;tr|D4A1Z2|D4A1Z2_RAT;tr|D4AE42|D4AE42_RAT	ENSRNOG00000004214;ENSRNOG00000032777;ENSRNOG00000039783	AABR07058519.1;AC094217.1;Rpl26	3
sp|P13084|NPM_RAT;sp|P13084-2|NPM_RAT;tr|D3ZXI2|D3ZXI2_RAT	ENSRNOG00000004616;ENSRNOG00000018923	AABR07041089.1;Npm1	2
tr|Q6PDV6|Q6PDV6_RAT;sp|P13471|RS14_RAT	ENSRNOG00000018774	LOC100911847;Rps14	2
tr|A0A0G2JSW0|A0A0G2JSW0_RAT;sp|P18666|ML12B_RAT;sp|P13832|MRLCA_RAT	ENSRNOG00000015278;ENSRNOG00000015733	Myl12a;Myl12b	2
sp|P15999|ATPA_RAT;tr|F1LP05|F1LP05_RAT;tr|A0A0G2K099|A0A0G2K099_RAT	ENSRNOG00000017032;ENSRNOG00000054846	AABR07022393.1;Atp5f1a	2
tr|D4A6G6|D4A6G6_RAT;sp|P17074|RS19_RAT;tr|A0A0H2UI38|A0A0H2UI38_RAT;tr|F1M8C7|F1M8C7_RAT;tr|D3ZGN8|D3ZGN8_RAT;tr|F1M764|F1M764_RAT;tr|F1LYF3|F1LYF3_RAT	ENSRNOG00000005430;ENSRNOG00000013292;ENSRNOG00000037897	AABR07040944.1;AC117101.1;Rps19;Rps19l2	4
tr|A0A0G2JXD0|A0A0G2JXD0_RAT;sp|P17077|RL9_RAT;tr|M0RBD4|M0RBD4_RAT;tr|M0R6B4|M0R6B4_RAT	ENSRNOG00000026716;ENSRNOG00000028449;ENSRNOG00000030476;ENSRNOG00000052909;ENSRNOG00000055770;ENSRNOG00000058695;ENSRNOG00000061320	AABR07036746.1;AABR07050391.2;AABR07050399.1;LOC100360449;LOC100364457;LOC103692829;Rpl9	7
sp|P17136|RSMB_RAT;sp|P63164|RSMN_RAT;tr|Q5XII7|Q5XII7_RAT	ENSRNOG00000006961;ENSRNOG00000059764	Snrpb;Snrpn	2
sp|P18163|ACSL1_RAT;sp|O88813|ACSL5_RAT;tr|F1LPB3|F1LPB3_RAT	ENSRNOG00000010633;ENSRNOG00000016265	Acsl1;Acsl5	2
sp|P18395|CSDE1_RAT	ENSRNOG00000046533;ENSRNOG00000061058	Csde1;LOC100364335	2
sp|P18422|PSA3_RAT	ENSRNOG00000007851	Psma3;Psma3l	2
tr|A0A0G2K7W6|A0A0G2K7W6_RAT;sp|P18445|RL27A_RAT;tr|D3ZI60|D3ZI60_RAT;tr|D4AAY6|D4AAY6_RAT;tr|D3ZG03|D3ZG03_RAT	ENSRNOG00000014214;ENSRNOG00000031273;ENSRNOG00000031736;ENSRNOG00000033274	AABR07034639.1;AC113910.1;LOC108351703;Rpl27a	4
sp|P19944|RLA1_RAT	ENSRNOG00000013874	LOC100360522;Rplp1	2
tr|Q6PDW2|Q6PDW2_RAT;tr|D3ZPN7|D3ZPN7_RAT;sp|P20280|RL21_RAT;tr|D3ZZH9|D3ZZH9_RAT;tr|M0R5R7|M0R5R7_RAT;tr|D4A870|D4A870_RAT;tr|D3ZPH0|D3ZPH0_RAT;tr|D3ZMI8|D3ZMI8_RAT;tr|D3Z9G3|D3Z9G3_RAT;tr|F1LY43|F1LY43_RAT;tr|D3ZQ96|D3ZQ96_RAT;tr|F1LWH4|F1LWH4_RAT;tr|D3ZRA9|D3ZRA9_RAT;tr|D3ZLH3|D3ZLH3_RAT;tr|D3ZE97|D3ZE97_RAT;tr|D4A7B4|D4A7B4_RAT;tr|D4A4G9|D4A4G9_RAT;tr|D3ZPV5|D3ZPV5_RAT;tr|D3ZPU6|D3ZPU6_RAT;tr…	ENSRNOG00000000957;ENSRNOG00000029410;ENSRNOG00000029824;ENSRNOG00000030999;ENSRNOG00000031560;ENSRNOG00000032803;ENSRNOG00000033115;ENSRNOG00000033487;ENSRNOG00000033855;ENSRNOG00000036588;ENSRNOG00000038458;ENSRNOG00000045620;ENSRNOG00000045767;ENSRNOG00000046349;ENSRNOG00000048518;ENSRNOG00000048656;ENSRNOG00000049248;ENSRNOG00000049848;ENSRNOG00000050165;ENSRNOG00000050799;ENSRNOG00000053044;…	AABR07007853.1;AABR07007905.1;AABR07012775.1;AABR07013302.1;AABR07026240.1;AABR07028558.1;AABR07030162.1;AABR07034641.1;AABR07037412.1;AABR07043626.1;AABR07052953.1;AABR07062466.1;AABR07067829.1;AABR07068760.1;AABR07069587.1;AABR07070238.2;AC121209.1;AC123185.1;Rpl21	19
tr|F1LQS3|F1LQS3_RAT;sp|P21533|RL6_RAT;tr|A0A0G2KBA1|A0A0G2KBA1_RAT	ENSRNOG00000025936;ENSRNOG00000055942	AC120310.1;Rpl6	2
tr|F1LPD6|F1LPD6_RAT;sp|P21775|THIKA_RAT;sp|P07871|THIKB_RAT;sp|P21775-2|THIKA_RAT	ENSRNOG00000032908	Acaa1a;Acaa1b	2
sp|P22071|3BHS1_RAT;tr|F1LNS3|F1LNS3_RAT;sp|Q62878|3BHS4_RAT	ENSRNOG00000019441	Hsd3b1;Hsd3b2	2
tr|A0A0G2KAA4|A0A0G2KAA4_RAT;tr|A0A140TAJ4|A0A140TAJ4_RAT;sp|P22072|3BHS2_RAT;tr|A0A0G2JSR3|A0A0G2JSR3_RAT;sp|P27364|3BHS5_RAT	ENSRNOG00000019417;ENSRNOG00000042884	Hsd3b3;Hsd3b5	2
sp|P23358|RL12_RAT;tr|A0A140TAC5|A0A140TAC5_RAT;tr|M0R4B6|M0R4B6_RAT;tr|D3ZJE2|D3ZJE2_RAT		LOC102555453;Rpl12	2
sp|P24049|RL17_RAT;tr|A0A0H2UHQ1|A0A0H2UHQ1_RAT;tr|F1LZX7|F1LZX7_RAT;tr|D3Z9G9|D3Z9G9_RAT	ENSRNOG00000018680;ENSRNOG00000029262	AABR07053166.1;Rpl17	2
sp|P24090|FETUA_RAT;tr|F1LM19|F1LM19_RAT;tr|Q7TP75|Q7TP75_RAT	ENSRNOG00000038370	AABR07034632.1;Ahsg	2
tr|F1LYI5|F1LYI5_RAT;tr|A0A0G2QC62|A0A0G2QC62_RAT;tr|M0R665|M0R665_RAT;sp|P25886|RL29_RAT;tr|D4A888|D4A888_RAT;tr|D3ZY63|D3ZY63_RAT;tr|D3Z8Q4|D3Z8Q4_RAT	ENSRNOG00000011138;ENSRNOG00000028320;ENSRNOG00000029594;ENSRNOG00000037172;ENSRNOG00000045666;ENSRNOG00000057505	AABR07015015.2;AABR07039651.1;AABR07043598.1;AABR07064000.1;AC132539.2;Rpl29	6
tr|A0A0U1RVI9|A0A0U1RVI9_RAT;sp|P27952|RS2_RAT;tr|A0A0G2KB28|A0A0G2KB28_RAT;tr|E9PT76|E9PT76_RAT;tr|D3ZT78|D3ZT78_RAT;tr|D3ZIY7|D3ZIY7_RAT	ENSRNOG00000003401;ENSRNOG00000014179;ENSRNOG00000020641;ENSRNOG00000022934;ENSRNOG00000030174;ENSRNOG00000033244	AABR07029195.1;AABR07042903.1;AABR07066818.1;AABR07069969.1;AC115384.1;Rps2	6
tr|A0A0G2JSL0|A0A0G2JSL0_RAT;sp|P28073|PSB6_RAT	ENSRNOG00000011827;ENSRNOG00000019551	LOC100360846;Psmb6	2
sp|P29314|RS9_RAT;tr|A0A0G2K4C4|A0A0G2K4C4_RAT;tr|D3ZV50|D3ZV50_RAT;tr|M0RB65|M0RB65_RAT	ENSRNOG00000039203;ENSRNOG00000058909	AABR07040892.1;Rps9;Rps9l1	3
sp|P30904|MIF_RAT;tr|D3ZE63|D3ZE63_RAT;tr|D4A3P7|D4A3P7_RAT		AABR07061532.1;AC127887.1;Mif	3
sp|P35171|CX7A2_RAT	ENSRNOG00000042903	Cox7a2;Cox7a2l2	2
sp|P35435|ATPG_RAT;tr|Q6PCU0|Q6PCU0_RAT;tr|Q6QI09|Q6QI09_RAT	ENSRNOG00000019223	Atp5f1c;Taf3	2
sp|P36876|2ABA_RAT;tr|A0A0G2K5X0|A0A0G2K5X0_RAT;tr|A0A0G2JWY9|A0A0G2JWY9_RAT;sp|P97888|2ABG_RAT	ENSRNOG00000011158;ENSRNOG00000058202	Ppp2r2a;Ppp2r2c	2
tr|Q66HM7|Q66HM7_RAT;sp|P38656|LA_RAT;tr|D3ZLH9|D3ZLH9_RAT	ENSRNOG00000007998;ENSRNOG00000011606	AABR07061825.1;Ssb	2
sp|P39069|KAD1_RAT;tr|A0A0G2K7Q6|A0A0G2K7Q6_RAT	ENSRNOG00000049056	AABR07051450.1;Ak1	2
sp|P40112|PSB3_RAT;tr|D3Z8J0|D3Z8J0_RAT	ENSRNOG00000038259;ENSRNOG00000052730	AABR07053749.1;Psmb3	2
tr|D3ZRM9|D3ZRM9_RAT;sp|P41123|RL13_RAT;tr|A0A0G2JYG9|A0A0G2JYG9_RAT;tr|F1M2E9|F1M2E9_RAT;tr|D3ZD02|D3ZD02_RAT	ENSRNOG00000015335;ENSRNOG00000029227;ENSRNOG00000059545	AABR07054469.1;AC114446.1;Rpl13	3
sp|P47728|CALB2_RAT;sp|P07171|CALB1_RAT	ENSRNOG00000007456;ENSRNOG00000016977	Calb1;Calb2	2
sp|P48500|TPIS_RAT;tr|A0A0G2JWU1|A0A0G2JWU1_RAT	ENSRNOG00000015290;ENSRNOG00000055222	AC094212.1;Tpi1	2
sp|P51583|PUR6_RAT;tr|F8WFR8|F8WFR8_RAT;tr|A0A0G2K5S4|A0A0G2K5S4_RAT	ENSRNOG00000002101;ENSRNOG00000056398	AABR07036855.1;Paics	2
tr|D3ZS25|D3ZS25_RAT;sp|P52925|HMGB2_RAT;tr|D3ZN59|D3ZN59_RAT	ENSRNOG00000013167;ENSRNOG00000026462;ENSRNOG00000029107;ENSRNOG00000033321	AABR07015743.1;Hmgb2;Hmgb2l1;RGD1559962	4
sp|P55770|NH2L1_RAT	ENSRNOG00000006762;ENSRNOG00000025154	LOC100359574;Snu13	2
tr|A0A0G2JY70|A0A0G2JY70_RAT;tr|A0A0H2UHG7|A0A0H2UHG7_RAT;tr|D3ZZK1|D3ZZK1_RAT;tr|A0A0G2K6L6|A0A0G2K6L6_RAT;sp|P60868|RS20_RAT;tr|M0RB28|M0RB28_RAT;tr|M0R5V6|M0R5V6_RAT;tr|M0R566|M0R566_RAT;tr|A0A0G2K8W1|A0A0G2K8W1_RAT;tr|M0R987|M0R987_RAT	ENSRNOG00000008555;ENSRNOG00000029341;ENSRNOG00000029627;ENSRNOG00000029843;ENSRNOG00000030345;ENSRNOG00000030426;ENSRNOG00000030596;ENSRNOG00000031205;ENSRNOG00000048426;ENSRNOG00000054540;ENSRNOG00000055526;ENSRNOG00000056863;ENSRNOG00000059138;ENSRNOG00000061454	AABR07036375.1;AABR07043775.1;AABR07043776.1;AABR07044509.1;AABR07050116.1;AABR07070957.1;AC121204.2;AC126292.2;AC136584.1;LOC100359951;LOC100362149;LOC100362684;LOC100364116;Rps20	14
tr|M0RBK1|M0RBK1_RAT;tr|A0A0G2JSV3|A0A0G2JSV3_RAT;sp|P60892|PRPS1_RAT	ENSRNOG00000032513;ENSRNOG00000056011;ENSRNOG00000060262	LOC314140;Prps1;Prps1l1	3
tr|F1M5C9|F1M5C9_RAT;tr|A0A0G2JV72|A0A0G2JV72_RAT;tr|A0A0G2K739|A0A0G2K739_RAT;sp|P62839|UB2D2_RAT;sp|P61078|UB2D3_RAT	ENSRNOG00000013741;ENSRNOG00000042523	Ube2d2;Ube2d3	2
tr|A0A0G2JV81|A0A0G2JV81_RAT;sp|P84079|ARF1_RAT;sp|P61206|ARF3_RAT;tr|A0A0G2K9H8|A0A0G2K9H8_RAT;sp|P84082|ARF2_RAT;tr|A0A0G2K4Q4|A0A0G2K4Q4_RAT	ENSRNOG00000004807;ENSRNOG00000054775;ENSRNOG00000057515;ENSRNOG00000060229	AABR07046136.1;Arf1;Arf2;Arf3;Fkbp11	5
sp|P61354|RL27_RAT;tr|M0R7P0|M0R7P0_RAT	ENSRNOG00000020674;ENSRNOG00000053282;ENSRNOG00000060888	AABR07070594.1;AABR07070689.2;Rpl27	3
sp|P61589|RHOA_RAT;tr|B2RYP0|B2RYP0_RAT	ENSRNOG00000012630;ENSRNOG00000050519	Rhoa;Rhoc	2
tr|F1M2K3|F1M2K3_RAT;sp|P61959|SUMO2_RAT;tr|F1LN30|F1LN30_RAT;tr|D4A7L5|D4A7L5_RAT;sp|Q5XIF4|SUMO3_RAT	ENSRNOG00000003670;ENSRNOG00000032840;ENSRNOG00000038489;ENSRNOG00000039674	AABR07034657.1;Sumo2;Sumo3;Sumo4	4
sp|P62083|RS7_RAT	ENSRNOG00000008551;ENSRNOG00000027694	LOC100362830;Rps7	2
sp|P62243|RS8_RAT;tr|M0R7Q5|M0R7Q5_RAT;tr|D3ZIE1|D3ZIE1_RAT;tr|Q6TXJ0|Q6TXJ0_RAT	ENSRNOG00000007238;ENSRNOG00000054626	LOC297756;Rps8	2
tr|D3ZLL8|D3ZLL8_RAT;sp|P62246|RS15A_RAT;tr|A0A0G2K6I0|A0A0G2K6I0_RAT;tr|D3ZZC7|D3ZZC7_RAT;tr|D3ZS61|D3ZS61_RAT	ENSRNOG00000018320;ENSRNOG00000030447;ENSRNOG00000032877	AABR07072261.1;AC105662.1;Rps15a	3
sp|P62268|RS23_RAT;tr|F1LTW8|F1LTW8_RAT;tr|D4A9Q3|D4A9Q3_RAT	ENSRNOG00000016580;ENSRNOG00000029461;ENSRNOG00000034052	AABR07071482.2;AABR07072400.1;Rps23	3
tr|M0R5K9|M0R5K9_RAT;tr|A0A0H2UHT6|A0A0H2UHT6_RAT;tr|D3ZM33|D3ZM33_RAT;sp|P62271|RS18_RAT;tr|D3ZAU6|D3ZAU6_RAT;tr|A0A0G2KA79|A0A0G2KA79_RAT	ENSRNOG00000014169;ENSRNOG00000028505;ENSRNOG00000030107;ENSRNOG00000032944;ENSRNOG00000033152;ENSRNOG00000033451	AABR07042892.1;AABR07049320.1;AABR07049329.1;AABR07057460.1;Rps18;Rps18l1	6
sp|P62278|RS13_RAT;tr|M0RCY2|M0RCY2_RAT	ENSRNOG00000028021;ENSRNOG00000048698	AABR07048031.1;LOC684988;Rps13	3
tr|F1M013|F1M013_RAT;tr|D3ZU22|D3ZU22_RAT;sp|P62425|RL7A_RAT;tr|D3ZPL5|D3ZPL5_RAT;tr|D4A6B9|D4A6B9_RAT;tr|M0R3M3|M0R3M3_RAT;tr|D3ZJH5|D3ZJH5_RAT;tr|F1M1M2|F1M1M2_RAT	ENSRNOG00000028826;ENSRNOG00000029423;ENSRNOG00000031532;ENSRNOG00000031902;ENSRNOG00000033843;ENSRNOG00000047737;ENSRNOG00000049097	AABR07007121.1;AABR07018167.1;AABR07027819.1;AABR07052519.1;AC128901.1;Rpl7a	6
tr|M0R757|M0R757_RAT;sp|P62630|EF1A1_RAT;tr|F1M6C2|F1M6C2_RAT	ENSRNOG00000009439;ENSRNOG00000029996	AABR07054368.1;Eef1a1	2
sp|P62718|RL18A_RAT;tr|F1M0K6|F1M0K6_RAT	ENSRNOG00000018795;ENSRNOG00000042547	AABR07001902.1;Rpl18a	2
tr|A0A0G2K4M6|A0A0G2K4M6_RAT;sp|P62738|ACTA_RAT;sp|P63269|ACTH_RAT	ENSRNOG00000029401;ENSRNOG00000058039	Acta2;Actg2	2
sp|P62749|HPCL1_RAT;sp|P84076|HPCA_RAT;sp|Q5PQN0|NCALD_RAT	ENSRNOG00000005492;ENSRNOG00000006979;ENSRNOG00000042978	Hpca;Hpcal1;Ncald	3
tr|F1LT35|F1LT35_RAT;tr|D3ZTH8|D3ZTH8_RAT;sp|P62752|RL23A_RAT;tr|D3ZNM1|D3ZNM1_RAT;tr|D4AAL7|D4AAL7_RAT;tr|D3ZFK7|D3ZFK7_RAT;tr|D3ZTX9|D3ZTX9_RAT	ENSRNOG00000023344;ENSRNOG00000028963;ENSRNOG00000029859;ENSRNOG00000032148;ENSRNOG00000032771	AABR07015476.1;AABR07018050.1;AABR07021384.1;AABR07064811.1;Rpl23a	5
sp|P62804|H4_RAT		Hist1h2ao;Hist1h4b;Hist1h4m;Hist2h4	4
sp|P62828|RAN_RAT;sp|Q8K586|RANT_RAT	ENSRNOG00000000938;ENSRNOG00000032913	Ran;Rasl2-9	2
sp|P62845|RS15_RAT;tr|D3ZAK6|D3ZAK6_RAT	ENSRNOG00000024603;ENSRNOG00000043026	AC128207.2;Rps15	2
tr|F1M6F4|F1M6F4_RAT;tr|A0A0H2UHU0|A0A0H2UHU0_RAT;sp|P62853|RS25_RAT;tr|D4AE10|D4AE10_RAT;tr|M0R763|M0R763_RAT	ENSRNOG00000027503;ENSRNOG00000029737;ENSRNOG00000031703;ENSRNOG00000047151;ENSRNOG00000055406	AABR07050701.1;AABR07061383.1;AABR07063959.1;AABR07071294.1;AABR07073045.1;Rps25	6
sp|P62859|RS28_RAT;tr|F1M168|F1M168_RAT;tr|A0A0A0MY14|A0A0A0MY14_RAT	ENSRNOG00000030242;ENSRNOG00000042886;ENSRNOG00000046342	AABR07024115.1;LOC100359503;Rps28	3
tr|A0A140TA99|A0A140TA99_RAT;sp|P62870|ELOB_RAT;tr|F1M937|F1M937_RAT;tr|F1LZ51|F1LZ51_RAT	ENSRNOG00000004814;ENSRNOG00000007803;ENSRNOG00000033199	AABR07068955.1;AC132539.1;Elob	3
sp|P62890|RL30_RAT;tr|A0A0G2K5E6|A0A0G2K5E6_RAT	ENSRNOG00000005975;ENSRNOG00000021406;ENSRNOG00000032825	LOC100362027;LOC108351936;Rpl30	3
tr|D4A5L9|D4A5L9_RAT;sp|P62898|CYC_RAT	ENSRNOG00000010452;ENSRNOG00000032885;ENSRNOG00000033559	AC128290.1;Cycs;LOC100363502	3
sp|P62902|RL31_RAT;tr|D3ZX87|D3ZX87_RAT;tr|D3ZK34|D3ZK34_RAT;tr|D3ZKU5|D3ZKU5_RAT;tr|D4ACQ2|D4ACQ2_RAT;tr|D4ABZ9|D4ABZ9_RAT;tr|D3ZVY6|D3ZVY6_RAT;tr|D3ZU04|D3ZU04_RAT;tr|D3Z8W1|D3Z8W1_RAT;tr|A0A0G2K7E3|A0A0G2K7E3_RAT	ENSRNOG00000013508;ENSRNOG00000025536;ENSRNOG00000029278;ENSRNOG00000030278;ENSRNOG00000030296;ENSRNOG00000031313;ENSRNOG00000033024;ENSRNOG00000039487;ENSRNOG00000050226	AABR07017576.1;AABR07018331.1;AABR07021008.1;AABR07032277.1;AABR07059675.1;AABR07071195.1;AC099453.1;AC103024.1;Rpl31	9
sp|P62909|RS3_RAT;tr|D3ZVH2|D3ZVH2_RAT	ENSRNOG00000007605;ENSRNOG00000017418	AABR07052430.1;Rps3	2
tr|D4A412|D4A412_RAT;sp|P62912|RL32_RAT;tr|D4A647|D4A647_RAT	ENSRNOG00000008516;ENSRNOG00000010746;ENSRNOG00000042147	AABR07049516.1;AC123018.1;Rpl32	3
tr|D4A6W6|D4A6W6_RAT;sp|P62919|RL8_RAT		AC129049.1;LOC100360117;Rpl8	3
sp|P62959|HINT1_RAT;tr|D4A269|D4A269_RAT	ENSRNOG00000000622;ENSRNOG00000005630	AABR07060778.1;Hint1	2
sp|P62982|RS27A_RAT;sp|P62986|RL40_RAT;tr|F1LU69|F1LU69_RAT;sp|P0CG51|UBB_RAT;tr|F1LML2|F1LML2_RAT;sp|Q63429|UBC_RAT	ENSRNOG00000004426;ENSRNOG00000019974;ENSRNOG00000057823	Rps27a;Uba52;Ubc	3
sp|P63018|HSP7C_RAT;tr|D4A4S3|D4A4S3_RAT;tr|M0RCB1|M0RCB1_RAT;tr|M0R8M9|M0R8M9_RAT;tr|F1LZI1|F1LZI1_RAT;tr|A0A0G2JVI3|A0A0G2JVI3_RAT	ENSRNOG00000032585;ENSRNOG00000034066;ENSRNOG00000034093;ENSRNOG00000061099	AABR07011951.1;AABR07033324.1;AABR07048992.1;Hspa8	4
tr|D3ZCR3|D3ZCR3_RAT;tr|A0A0G2K6P4|A0A0G2K6P4_RAT;sp|P63159|HMGB1_RAT;tr|D3ZLG3|D3ZLG3_RAT;tr|D3ZXR5|D3ZXR5_RAT;tr|D4A6A9|D4A6A9_RAT;tr|D3ZIU9|D3ZIU9_RAT	ENSRNOG00000032550;ENSRNOG00000034130;ENSRNOG00000038437;ENSRNOG00000048544;ENSRNOG00000051482;ENSRNOG00000058908	AABR07025074.1;AABR07060165.1;Hmg1l1;Hmgb1;LOC108349189;LOC108350839	6
sp|P63259|ACTG_RAT	ENSRNOG00000036701;ENSRNOG00000053452	Actg1;LOC100361457	2
sp|P68035|ACTC_RAT;sp|P68136|ACTS_RAT	ENSRNOG00000008536;ENSRNOG00000017786	Acta1;Actc1	2
sp|P83883|RL36A_RAT	ENSRNOG00000011494;ENSRNOG00000031022	Rpl36a;Rpl36al	2
sp|P83941|ELOC_RAT;tr|A0A0G2K2A0|A0A0G2K2A0_RAT;tr|A0A096MIY6|A0A096MIY6_RAT	ENSRNOG00000031730;ENSRNOG00000051063;ENSRNOG00000061371	AABR07035541.3;AABR07044940.1;Eloc	3
sp|P84100|RL19_RAT;tr|F1M5A9|F1M5A9_RAT	ENSRNOG00000004741;ENSRNOG00000005826	RGD1562420;Rpl19	2
tr|M0RBX6|M0RBX6_RAT;tr|D3ZK97|D3ZK97_RAT;tr|D3ZJ08|D3ZJ08_RAT;sp|Q6LED0|H31_RAT;sp|P84245|H33_RAT;tr|A0A0G2K0N8|A0A0G2K0N8_RAT;tr|A0A0G2K9I5|A0A0G2K9I5_RAT		AABR07027811.2;AC119603.1;H3c1;H3c13;H3f3a;H3f3b;H3f3c;Hist1h2ail1;Hist1h3b;Hist2h3c2;LOC102548682;LOC102549173;RGD1564548	13
sp|P85108|TBB2A_RAT;sp|Q3KRE8|TBB2B_RAT	ENSRNOG00000017445;ENSRNOG00000017558	Tubb2a;Tubb2b	2
sp|P85515|ACTZ_RAT;tr|B2RYJ7|B2RYJ7_RAT	ENSRNOG00000016789;ENSRNOG00000019725	Actr1a;Actr1b	2
sp|P85968|6PGD_RAT;tr|A0A0G2K7Q8|A0A0G2K7Q8_RAT	ENSRNOG00000057626	Kif1b;Pgd	2
sp|Q27W02|MGN_RAT;tr|F1M0X6|F1M0X6_RAT	ENSRNOG00000010316;ENSRNOG00000012778	Magoh;Magohb	2
sp|Q3T1J1|IF5A1_RAT;tr|G3V7J7|G3V7J7_RAT	ENSRNOG00000011859;ENSRNOG00000016478	Eif5a;Eif5a2	2
sp|Q4AEF8|COPG1_RAT;tr|A0A0G2K1F3|A0A0G2K1F3_RAT	ENSRNOG00000010474	Copg1;Hmces	2
sp|Q4KLL0|TCEA1_RAT	ENSRNOG00000022323	LOC498453;Tcea1	2
tr|A0A0U1RRZ4|A0A0U1RRZ4_RAT;sp|Q4KLP0|DHTK1_RAT	ENSRNOG00000023587;ENSRNOG00000062048	AC141220.4;Dhtkd1	2
sp|Q4QQW4|HDAC1_RAT;tr|D3ZVU7|D3ZVU7_RAT	ENSRNOG00000009568;ENSRNOG00000013695	Hdac1;Hdac1l	2
tr|A0A1W2Q6F8|A0A1W2Q6F8_RAT;sp|Q561S0|NDUAA_RAT	ENSRNOG00000016470;ENSRNOG00000062245	Ndufa10;Ndufa10l1	2
sp|Q5FVQ4|MLEC_RAT;tr|A0A0G2K121|A0A0G2K121_RAT	ENSRNOG00000021725	Mlec;Unc119b	2
sp|Q62885|U119A_RAT;tr|A0A0G2K351|A0A0G2K351_RAT	ENSRNOG00000011060;ENSRNOG00000021725	Unc119;Unc119b	2
tr|F1LSW7|F1LSW7_RAT;sp|Q63507|RL14_RAT;tr|B5DEM5|B5DEM5_RAT;tr|Q6TUH8|Q6TUH8_RAT	ENSRNOG00000019007;ENSRNOG00000031061	LOC306079;Rpl14	2
tr|A0A0G2K3Z9|A0A0G2K3Z9_RAT;sp|Q63716|PRDX1_RAT	ENSRNOG00000017194;ENSRNOG00000017695	AABR07012795.1;Prdx1	2
sp|Q66H61|SYQ_RAT;tr|M0RDR7|M0RDR7_RAT	ENSRNOG00000060912	LOC100911132;Qars1	2
sp|Q68FR8|TBA3_RAT	ENSRNOG00000031707;ENSRNOG00000032967	Tuba3a;Tuba3b	2
sp|Q6AYK1|RNPS1_RAT;tr|F1M6U2|F1M6U2_RAT	ENSRNOG00000008703;ENSRNOG00000027239	AABR07037800.1;Rnps1	2
sp|Q6AYP0|ALLC_RAT;tr|A0A0G2K2I1|A0A0G2K2I1_RAT	ENSRNOG00000008299	Allc;Dcdc2c	2
sp|Q6P9V9|TBA1B_RAT;sp|Q5XIF6|TBA4A_RAT	ENSRNOG00000003597;ENSRNOG00000053468	Tuba1b;Tuba4a	2
sp|Q6URK4-2|ROA3_RAT;tr|D4A6A2|D4A6A2_RAT;tr|E9PSU5|E9PSU5_RAT	ENSRNOG00000038905;ENSRNOG00000052968	AABR07048397.1;Hnrnpa3	2
tr|A0A0G2JVA7|A0A0G2JVA7_RAT;sp|Q6VV72|IF1A_RAT;tr|B5DF60|B5DF60_RAT	ENSRNOG00000005736;ENSRNOG00000031421	Eif1a;Eif1ax	2
tr|M0RA26|M0RA26_RAT;sp|Q71TY3|RS27_RAT	ENSRNOG00000016961;ENSRNOG00000021159	LOC100362987;Rps27	2
sp|Q793F9|VPS4A_RAT;tr|F7F1Y3|F7F1Y3_RAT;tr|Q4KLL7|Q4KLL7_RAT;sp|Q6GX84|FIGL1_RAT	ENSRNOG00000002705;ENSRNOG00000004440;ENSRNOG00000020351	Fignl1;Vps4a;Vps4b	3
sp|Q7M0E3|DEST_RAT;tr|D4A315|D4A315_RAT	ENSRNOG00000005924;ENSRNOG00000026891	AC093995.1;Dstn	2
tr|A0A0G2K231|A0A0G2K231_RAT;sp|Q7TPK6|WNK4_RAT;tr|A0A0G2KAS8|A0A0G2KAS8_RAT;tr|D3ZMJ7|D3ZMJ7_RAT	ENSRNOG00000016684;ENSRNOG00000020441	Wnk2;Wnk4	2
tr|G3V790|G3V790_RAT;sp|Q8K1P7|SMCA4_RAT;tr|A0A0G2JUS4|A0A0G2JUS4_RAT;tr|E9PTG1|E9PTG1_RAT	ENSRNOG00000009271;ENSRNOG00000011931	Smarca2;Smarca4	2
sp|Q8VIF7|SBP1_RAT;tr|F1LRJ9|F1LRJ9_RAT	ENSRNOG00000047158;ENSRNOG00000053812	LOC103689947;Selenbp1	2
tr|A0A0G2K9Y5|A0A0G2K9Y5_RAT;sp|Q99PS8|HRG_RAT;tr|A0A0G2K3G0|A0A0G2K3G0_RAT	ENSRNOG00000001809	Hrg;LOC681544	2
tr|A0A0G2K613|A0A0G2K613_RAT;sp|Q9EPH2|MRP_RAT	ENSRNOG00000009113;ENSRNOG00000054614	AABR07002779.1;Marcksl1	2
tr|F7FG31|F7FG31_RAT;tr|A0A0H2UI20|A0A0H2UI20_RAT;sp|Q9Z2F5|CTBP1_RAT;sp|Q9EQH5|CTBP2_RAT;sp|Q9EQH5-2|CTBP2_RAT	ENSRNOG00000005428;ENSRNOG00000017326	Ctbp1;Ctbp2	2
sp|Q9JHU0|DPYL5_RAT;tr|A0A0G2K8Y5|A0A0G2K8Y5_RAT	ENSRNOG00000008996	Dpysl5;LOC103692570	2
sp|Q9JJW3|ATPMK_RAT	ENSRNOG00000020296;ENSRNOG00000042869	Atp5mk;LOC103693430	2
sp|Q9JKU3|IF172_RAT;tr|A0A096MK45|A0A096MK45_RAT	ENSRNOG00000057813	AABR07063281.1;Ift172	2
tr|Q68G14|Q68G14_RAT;sp|Q9QY16|DDX25_RAT;sp|Q9QY16-3|DDX25_RAT;sp|Q9QY16-2|DDX25_RAT;tr|Q68FX3|Q68FX3_RAT;tr|A0A0G2K7X6|A0A0G2K7X6_RAT;tr|A0A0G2JY21|A0A0G2JY21_RAT;tr|A0A0G2JUH2|A0A0G2JUH2_RAT;tr|A0A0G2JZQ1|A0A0G2JZQ1_RAT	ENSRNOG00000012260;ENSRNOG00000018033	Ddx19a;Ddx19b;Ddx25	3
tr|A0A0G2JT63|A0A0G2JT63_RAT;tr|A0A0G2K472|A0A0G2K472_RAT;tr|D4A8H8|D4A8H8_RAT	ENSRNOG00000006557;ENSRNOG00000011945	Cyfip1;Cyfip2	2
tr|B4F7C9|B4F7C9_RAT;tr|A0A0G2JWH5|A0A0G2JWH5_RAT	ENSRNOG00000031896	Chek1;Stt3a	2
tr|A0A0G2JWZ2|A0A0G2JWZ2_RAT;sp|O08590|AOC3_RAT	ENSRNOG00000051307;ENSRNOG00000053448	AC123346.1;Aoc3	2
tr|M0R4L7|M0R4L7_RAT;tr|G3V9C7|G3V9C7_RAT;tr|G3V8B3|G3V8B3_RAT;tr|D3ZWM5|D3ZWM5_RAT;tr|A0A0G2JXE0|A0A0G2JXE0_RAT;tr|D3ZNH4|D3ZNH4_RAT;tr|A0A0G2JXI9|A0A0G2JXI9_RAT;sp|Q00715|H2B1_RAT;tr|D3ZLY9|D3ZLY9_RAT;tr|A0A0G2K7R1|A0A0G2K7R1_RAT;tr|D4A817|D4A817_RAT	ENSRNOG00000021198;ENSRNOG00000045753;ENSRNOG00000047776;ENSRNOG00000053845;ENSRNOG00000054296;ENSRNOG00000055512;ENSRNOG00000058187;ENSRNOG00000058263;ENSRNOG00000059093;ENSRNOG00000059382;ENSRNOG00000059949;ENSRNOG00000060769	AABR07012583.2;H2bc12;H2bc9;Hist1h2bc;Hist1h2bd;Hist1h2bg;Hist1h2bl;Hist1h2bo;Hist1h2bq;Hist2h2be;LOC100364835;LOC100365043;LOC100910200;LOC102549061;LOC684797	15
tr|D4A6T1|D4A6T1_RAT;tr|A0A0G2K0I1|A0A0G2K0I1_RAT;tr|F1M5A4|F1M5A4_RAT	ENSRNOG00000017462;ENSRNOG00000017788	Katnal2;Spata5	2
tr|B1WC16|B1WC16_RAT;tr|A0A0G2K2S3|A0A0G2K2S3_RAT;tr|A0A0G2K1G0|A0A0G2K1G0_RAT	ENSRNOG00000058050	Bclaf1;Mtfr2	2
tr|A0A0G2K290|A0A0G2K290_RAT;tr|A0A0G2K3A6|A0A0G2K3A6_RAT;tr|A0A0G2JUY4|A0A0G2JUY4_RAT;tr|A0A0G2K4A4|A0A0G2K4A4_RAT;tr|M0RBL2|M0RBL2_RAT;tr|A0A0G2JWW4|A0A0G2JWW4_RAT	ENSRNOG00000048458;ENSRNOG00000049243;ENSRNOG00000050912;ENSRNOG00000053312;ENSRNOG00000056043;ENSRNOG00000056760;ENSRNOG00000056828;ENSRNOG00000058352;ENSRNOG00000059121	AABR07065651.4;AABR07065656.3;AABR07065656.4;AABR07065656.8;AABR07065684.1;AABR07065699.4;AABR07065705.1;AABR07065705.3;AABR07065714.1	9
tr|A0A0G2K3P1|A0A0G2K3P1_RAT;tr|Q5U3Y8|Q5U3Y8_RAT;tr|M0R5M7|M0R5M7_RAT;tr|A0A0G2K5C5|A0A0G2K5C5_RAT	ENSRNOG00000016912;ENSRNOG00000028058;ENSRNOG00000029243;ENSRNOG00000031864	AABR07021871.1;AABR07058578.1;AABR07064716.1;Btf3	4
tr|A0A0G2K4F4|A0A0G2K4F4_RAT;tr|A0A0G2JW93|A0A0G2JW93_RAT;tr|D3ZMY3|D3ZMY3_RAT;tr|A0A0G2K1M6|A0A0G2K1M6_RAT;tr|A0A0G2JY74|A0A0G2JY74_RAT;tr|A0A0G2JV60|A0A0G2JV60_RAT	ENSRNOG00000055742;ENSRNOG00000056486;ENSRNOG00000057013	AABR07040430.1;LOC103694517;LOC681067;RGD1566225	4
tr|D3ZQG9|D3ZQG9_RAT;tr|A0A0G2K4X1|A0A0G2K4X1_RAT;tr|A0A0G2K8G8|A0A0G2K8G8_RAT;tr|A0A0G2K4S5|A0A0G2K4S5_RAT;tr|Q6MGB8|Q6MGB8_RAT;tr|E9PSS8|E9PSS8_RAT;tr|A0A0G2K2E1|A0A0G2K2E1_RAT;tr|Q6MGB9|Q6MGB9_RAT;tr|Q861Q1|Q861Q1_RAT;tr|Q95II0|Q95II0_RAT;tr|A0A0G2K1E1|A0A0G2K1E1_RAT	ENSRNOG00000000723;ENSRNOG00000030712;ENSRNOG00000038999;ENSRNOG00000039744	RT1-A1;RT1-A2;RT1-CE4;RT1-CE5	4
tr|A0A0G2K4U2|A0A0G2K4U2_RAT	ENSRNOG00000018937	Gstm2;Gstm7	2
tr|D4A3I4|D4A3I4_RAT;tr|A0A0G2K4W2|A0A0G2K4W2_RAT;tr|A0A0G2K8T5|A0A0G2K8T5_RAT	ENSRNOG00000008512;ENSRNOG00000024829;ENSRNOG00000031086	AABR07006504.1;AABR07014804.1;Btf3l4	3
tr|A0A0G2K508|A0A0G2K508_RAT;tr|Q5BJU0|Q5BJU0_RAT;sp|D3Z8L7|RRAS_RAT	ENSRNOG00000012258;ENSRNOG00000037247	Rras;Rras2	2
tr|A0A0G2K5A4|A0A0G2K5A4_RAT;tr|D3ZLD5|D3ZLD5_RAT	ENSRNOG00000037437;ENSRNOG00000061046	AABR07059632.3;Golga3	2
tr|A0A0G2K8Q7|A0A0G2K8Q7_RAT;tr|Q6MG66|Q6MG66_RAT;tr|A0A0G2K375|A0A0G2K375_RAT;tr|A0A0G2KAB8|A0A0G2KAB8_RAT	ENSRNOG00000011065;ENSRNOG00000048725	AC126899.1;Lsm2	2
tr|D3ZJU5|D3ZJU5_RAT;tr|A0A0G2K9D6|A0A0G2K9D6_RAT;tr|D4A510|D4A510_RAT	ENSRNOG00000020804;ENSRNOG00000031135	Smarcc1;Smarcc2	2
tr|A0A0G2K9Y0|A0A0G2K9Y0_RAT;tr|F1LPQ6|F1LPQ6_RAT;sp|P20759|IGHG1_RAT;tr|F1LN61|F1LN61_RAT;tr|A0A0G2K477|A0A0G2K477_RAT	ENSRNOG00000030332;ENSRNOG00000034190	Ighg1;Ighm	2
tr|A0A0U1RRQ7|A0A0U1RRQ7_RAT;tr|D3ZEH3|D3ZEH3_RAT;sp|P61621|S61A1_RAT	ENSRNOG00000013743;ENSRNOG00000023278	Sec61a1;Sec61a2	2
tr|A1L1M0|A1L1M0_RAT;sp|P27791-2|KAPCA_RAT;sp|P27791|KAPCA_RAT;sp|P68182|KAPCB_RAT	ENSRNOG00000004978;ENSRNOG00000005257	Prkaca;Prkacb	2
tr|B0K008|B0K008_RAT;tr|B5DFN1|B5DFN1_RAT	ENSRNOG00000018848;ENSRNOG00000033765	Eif1;Eif1b	2
tr|B5DEP7|B5DEP7_RAT;tr|A0A0G2K3V8|A0A0G2K3V8_RAT	ENSRNOG00000016507;ENSRNOG00000032232;ENSRNOG00000058521	AABR07042226.1;LOC687679;Snrpg	3
tr|B5DES0|B5DES0_RAT;tr|M0R8K2|M0R8K2_RAT	ENSRNOG00000015844;ENSRNOG00000048758	Snrpd2;Snrpd2l	2
tr|B5DF74|B5DF74_RAT;tr|F1LWM8|F1LWM8_RAT	ENSRNOG00000001782;ENSRNOG00000011435	Osbpl10;Osbpl11	2
tr|D3ZCZ9|D3ZCZ9_RAT;sp|P52504|NDUS6_RAT		LOC679739;Ndufs6	2
tr|Q642E2|Q642E2_RAT;tr|D3ZJD3|D3ZJD3_RAT;tr|D3ZEI0|D3ZEI0_RAT;sp|P17702|RL28_RAT	ENSRNOG00000009240;ENSRNOG00000017127;ENSRNOG00000037673	AABR07016623.1;AABR07071891.1;Rpl28	3
tr|D3ZFY8|D3ZFY8_RAT;tr|F1M227|F1M227_RAT	ENSRNOG00000022456;ENSRNOG00000025580	AABR07067339.1;LOC679539;Ube2v1	3
tr|D3ZN21|D3ZN21_RAT;tr|A0A0G2K719|A0A0G2K719_RAT;tr|A0A0G2K9N3|A0A0G2K9N3_RAT;tr|D4ADE8|D4ADE8_RAT	ENSRNOG00000002501;ENSRNOG00000023383	Ddx3x;Ddx3y	2
tr|D3ZPP2|D3ZPP2_RAT;sp|Q66HA6|ARL8B_RAT	ENSRNOG00000005988;ENSRNOG00000055860	Arl8a;Arl8b	2
tr|D3ZXP3|D3ZXP3_RAT;tr|D3ZWE0|D3ZWE0_RAT	ENSRNOG00000010386;ENSRNOG00000048317	H2ac21;H2ax	2
tr|Q5RK17|Q5RK17_RAT;tr|D4A7Z5|D4A7Z5_RAT	ENSRNOG00000008548;ENSRNOG00000029197	Diablo;LOC100360940	2
tr|F1LNL2|F1LNL2_RAT;tr|F1M7H3|F1M7H3_RAT	ENSRNOG00000018149;ENSRNOG00000021584	AABR07028349.1;Smarca5	2
tr|F1LQP9|F1LQP9_RAT;tr|D3ZER6|D3ZER6_RAT	ENSRNOG00000003970;ENSRNOG00000014999	Tnpo1;Tnpo2	2
tr|F7EPH4|F7EPH4_RAT;tr|A0A0G2JUD2|A0A0G2JUD2_RAT	ENSRNOG00000000557	Ppa1;Sar1a	2
tr|G3V7C6|G3V7C6_RAT;sp|Q6P9T8|TBB4B_RAT;tr|B4F7C2|B4F7C2_RAT	ENSRNOG00000010170;ENSRNOG00000047505	Tubb4a;Tubb4b	2
tr|G3V7F6|G3V7F6_RAT	ENSRNOG00000010732;ENSRNOG00000020771	RGD1561590;Sap18	2
tr|Q3KR55|Q3KR55_RAT;sp|Q7TP17|U2AF4_RAT	ENSRNOG00000024497;ENSRNOG00000045860	U2af1;U2af1l4	2
tr|Q5PQR7|Q5PQR7_RAT;tr|Q5BJN3|Q5BJN3_RAT;tr|A0A0G2K1I8|A0A0G2K1I8_RAT	ENSRNOG00000016813;ENSRNOG00000020271	Tia1;Tial1	2
tr|Q5RJK5|Q5RJK5_RAT;tr|Q5RJL1|Q5RJL1_RAT;tr|A0A0G2JYP0|A0A0G2JYP0_RAT	ENSRNOG00000011814;ENSRNOG00000033177	AC118841.1;Cbx3	2
tr|Q5RKJ9|Q5RKJ9_RAT;sp|P35281|RAB10_RAT;sp|P35286|RAB13_RAT	ENSRNOG00000016733;ENSRNOG00000047088	Rab10;Rab13	2
tr|Q6AYD5|Q6AYD5_RAT;tr|A0A096MJE3|A0A096MJE3_RAT	ENSRNOG00000046271;ENSRNOG00000048817	Gspt1;Gspt2	2
tr|Q6PDV8|Q6PDV8_RAT;sp|P47198|RL22_RAT	ENSRNOG00000011104;ENSRNOG00000028747	LOC100360057;Rpl22	2
tr|Q6PDW1|Q6PDW1_RAT;tr|D3ZHB3|D3ZHB3_RAT;sp|P63324|RS12_RAT	ENSRNOG00000016411;ENSRNOG00000020093	LOC100360573;Rps12	2
tr|Q6T5E8|Q6T5E8_RAT;sp|Q64633|UD17_RAT;tr|Q6T5F3|Q6T5F3_RAT;tr|Q6T5E7|Q6T5E7_RAT;tr|Q6T5F1|Q6T5F1_RAT;tr|Q6T5F0|Q6T5F0_RAT;tr|Q6T5F2|Q6T5F2_RAT;sp|Q64550|UD11_RAT;sp|Q64634|UD18_RAT;sp|Q64638|UD15_RAT;sp|Q64637|UD13_RAT;sp|P20720|UD12_RAT		Ugt1a1;Ugt1a2;Ugt1a3;Ugt1a5;Ugt1a7c;Ugt1a8;Ugt1a9	7
sp|A9UMV8|H2AJ_RAT;tr|G3V9C0|G3V9C0_RAT;tr|D3ZVK7|D3ZVK7_RAT;sp|Q4FZT6|H2A3_RAT;sp|P0C170|H2A1E_RAT;sp|P0C169|H2A1C_RAT;tr|M0RDM4|M0RDM4_RAT;tr|Q6I8Q6|Q6I8Q6_RAT		H2ac4;H2aj;Hist1h2ac;Hist1h2af;Hist1h2ah;Hist1h2ai;hist1h2ail2;Hist1h2an;Hist3h2a;LOC103690190;LOC684773	11
tr|H9KVF3|H9KVF3_RAT;sp|B0LT89|STK24_RAT;tr|Q6V9V9|Q6V9V9_RAT;tr|F1LXV3|F1LXV3_RAT	ENSRNOG00000007879;ENSRNOG00000011511;ENSRNOG00000018181	Stk24;Stk25;Stk26	3
tr|M0R5F8|M0R5F8_RAT;sp|B4F777|HMGN5_RAT	ENSRNOG00000029078;ENSRNOG00000049192	Hmgn5;Hmgn5b	2
sp|D4A1R8|CPNE1_RAT	ENSRNOG00000019723;ENSRNOG00000050864	Cpne1;Rbm12	2
tr|A0A0G2K8K9|A0A0G2K8K9_RAT;sp|P84586|RMXRL_RAT;sp|D4AE41|RMXL1_RAT;sp|Q4V898|RBMX_RAT;tr|A0A0A0MXW9|A0A0A0MXW9_RAT	ENSRNOG00000000866;ENSRNOG00000012138	Rbmx;Rbmxl1	2
sp|M0RC99|RAB5A_RAT	ENSRNOG00000057056	Rab5a;Rab5al1	2
sp|O08590|AOC3_RAT;tr|A0A0G2JWZ2|A0A0G2JWZ2_RAT	ENSRNOG00000051307;ENSRNOG00000053448	AC123346.1;Aoc3	2
sp|O35142|COPB2_RAT;tr|A0A0G2K0P9|A0A0G2K0P9_RAT	ENSRNOG00000060723	AABR07071244.1;Copb2	2
sp|O70377|SNP23_RAT;tr|M0R4V3|M0R4V3_RAT	ENSRNOG00000050552	AABR07053516.1;Snap23	2
tr|B2GV28|B2GV28_RAT;sp|P00176|CP2B1_RAT;tr|A0A140UHW7|A0A140UHW7_RAT;sp|P04167|CP2B2_RAT;sp|P04167-2|CP2B2_RAT;tr|F1LSA2|F1LSA2_RAT;tr|F7FBM8|F7FBM8_RAT	ENSRNOG00000020775;ENSRNOG00000033680	Cyp2b1;Cyp2b2	2
sp|P01946|HBA_RAT;tr|A0A0G2JSV6|A0A0G2JSV6_RAT	ENSRNOG00000029886;ENSRNOG00000047321	Hba-a1;Hba-a2	2
tr|A0A0H2UHQ8|A0A0H2UHQ8_RAT;tr|D3ZFA8|D3ZFA8_RAT;sp|P04644|RS17_RAT;tr|D3ZKG6|D3ZKG6_RAT;tr|M0R8M8|M0R8M8_RAT;tr|F1M5B1|F1M5B1_RAT;tr|D3ZHU9|D3ZHU9_RAT	ENSRNOG00000019106;ENSRNOG00000030162;ENSRNOG00000032765;ENSRNOG00000045885;ENSRNOG00000048585;ENSRNOG00000048927	AABR07018244.1;AABR07018533.1;AABR07068536.1;AC114393.1;LOC100365810;Rps17	6
tr|M0R5J4|M0R5J4_RAT;sp|P04764|ENOA_RAT	ENSRNOG00000017895;ENSRNOG00000028543	AABR07052523.1;Eno1	2
tr|M0R590|M0R590_RAT;tr|D3ZGY4|D3ZGY4_RAT;sp|P04797|G3P_RAT;tr|M0R660|M0R660_RAT	ENSRNOG00000018630;ENSRNOG00000033057;ENSRNOG00000050630	AABR07025010.1;AABR07070043.1;Gapdh;LOC108351137	4
tr|A0A0G2JXC3|A0A0G2JXC3_RAT;sp|P05765|RS21_RAT;tr|D3ZSE0|D3ZSE0_RAT	ENSRNOG00000033916;ENSRNOG00000060449	AC141489.1;Rps21	2
sp|P06302|PTMA_RAT	ENSRNOG00000018584;ENSRNOG00000025731	LOC100359583;Ptma	2
sp|P21775-2|THIKA_RAT;sp|P07871|THIKB_RAT;tr|F1LPD6|F1LPD6_RAT;sp|P21775|THIKA_RAT	ENSRNOG00000032908	Acaa1a;Acaa1b	2
sp|P08644-2|RASK_RAT;sp|Q04970|RASN_RAT;sp|P08644|RASK_RAT;sp|P20171|RASH_RAT	ENSRNOG00000009338;ENSRNOG00000016611;ENSRNOG00000023079	Hras;Kras;Nras	3
tr|A0A0G2JSV3|A0A0G2JSV3_RAT;sp|P60892|PRPS1_RAT;sp|P09330|PRPS2_RAT;tr|M0RBK1|M0RBK1_RAT	ENSRNOG00000004160;ENSRNOG00000032513;ENSRNOG00000056011;ENSRNOG00000060262	LOC314140;Prps1;Prps1l1;Prps2	4
sp|P09895|RL5_RAT;tr|D3ZHP8|D3ZHP8_RAT	ENSRNOG00000023529;ENSRNOG00000037220	AABR07031089.1;Rpl5	2
tr|A0A0A0MXW3|A0A0A0MXW3_RAT;tr|D4AEC0|D4AEC0_RAT;sp|P0C0S7|H2AZ_RAT	ENSRNOG00000010306;ENSRNOG00000052275	H2az1;H2az2	2
tr|D4ACV3|D4ACV3_RAT;sp|P0CC09|H2A2A_RAT	ENSRNOG00000047898;ENSRNOG00000052555	Hist2h2aa2;Hist2h2aa3	2
sp|P62986|RL40_RAT;sp|P62982|RS27A_RAT;sp|P0CG51|UBB_RAT;tr|F1LML2|F1LML2_RAT;sp|Q63429|UBC_RAT;tr|F1LU69|F1LU69_RAT	ENSRNOG00000004426;ENSRNOG00000019974;ENSRNOG00000057823	Rps27a;Uba52;Ubc	3
sp|P0DMW1|HS71B_RAT;sp|P0DMW0|HS71A_RAT		Hspa1a;Hspa1b	2
sp|P0DP31|CALM3_RAT;sp|P0DP30|CALM2_RAT;sp|P0DP29|CALM1_RAT;tr|D4ABV5|D4ABV5_RAT	ENSRNOG00000004060;ENSRNOG00000016770;ENSRNOG00000030871	Calm1;Calm2;Calm3	3
tr|A0A0G2K2E4|A0A0G2K2E4_RAT;sp|P10111|PPIA_RAT;tr|A0A0G2K1P0|A0A0G2K1P0_RAT	ENSRNOG00000027864;ENSRNOG00000031045;ENSRNOG00000055068	LOC100911252;Ppia;Ppial4d	3
sp|P10959|EST1C_RAT;tr|D3ZGK7|D3ZGK7_RAT	ENSRNOG00000015438	Ces1c;Ces1f;LOC501233	3
sp|P11517|HBB2_RAT	ENSRNOG00000047098;ENSRNOG00000061299	Hbb-bs;LOC100134871	2
sp|P12711|ADHX_RAT;tr|Q7TQ90|Q7TQ90_RAT;tr|G3V7J9|G3V7J9_RAT;sp|P41682|ADH7_RAT	ENSRNOG00000032959;ENSRNOG00000046357	Adh4;Adh5;Adh7	3
tr|Q6PDV6|Q6PDV6_RAT;sp|P13471|RS14_RAT	ENSRNOG00000018774	LOC100911847;Rps14	2
tr|A0A096MK73|A0A096MK73_RAT;sp|P13668|STMN1_RAT;sp|P21818|STMN2_RAT	ENSRNOG00000011705;ENSRNOG00000016810	Stmn1;Stmn2	2
sp|P15999|ATPA_RAT;tr|F1LP05|F1LP05_RAT;tr|A0A0G2K099|A0A0G2K099_RAT	ENSRNOG00000017032;ENSRNOG00000054846	AABR07022393.1;Atp5f1a	2
sp|P16391|HA12_RAT;tr|Q6MGB8|Q6MGB8_RAT;sp|P15978|HA11_RAT	ENSRNOG00000030712	RT1-A2;RT1-EC2	2
sp|P16409|MYL3_RAT;sp|P02600-2|MYL1_RAT;sp|P02600|MYL1_RAT	ENSRNOG00000013262;ENSRNOG00000020955	Myl1;Myl3	2
tr|D4A6G6|D4A6G6_RAT;sp|P17074|RS19_RAT;tr|A0A0H2UI38|A0A0H2UI38_RAT;tr|F1M8C7|F1M8C7_RAT;tr|D3ZGN8|D3ZGN8_RAT;tr|D3ZSH6|D3ZSH6_RAT;tr|F1M764|F1M764_RAT;tr|F1LYF3|F1LYF3_RAT	ENSRNOG00000005430;ENSRNOG00000009861;ENSRNOG00000013292;ENSRNOG00000037897	AABR07028859.1;AABR07040944.1;AC117101.1;Rps19;Rps19l2	5
tr|A0A0G2JXD0|A0A0G2JXD0_RAT;sp|P17077|RL9_RAT;tr|F1M7A9|F1M7A9_RAT;tr|M0R6B4|M0R6B4_RAT;tr|M0RBD4|M0RBD4_RAT	ENSRNOG00000026716;ENSRNOG00000028449;ENSRNOG00000030476;ENSRNOG00000031879;ENSRNOG00000052909;ENSRNOG00000055770;ENSRNOG00000058695;ENSRNOG00000061320	AABR07026048.1;AABR07036746.1;AABR07050391.2;AABR07050399.1;LOC100360449;LOC100364457;LOC103692829;Rpl9	8
sp|P17078|RL35_RAT;tr|F1M6G3|F1M6G3_RAT;tr|D3ZN79|D3ZN79_RAT;tr|D3Z942|D3Z942_RAT	ENSRNOG00000003158;ENSRNOG00000014105;ENSRNOG00000014272;ENSRNOG00000030364	AABR07031666.1;AABR07037343.1;AC103056.1;Rpl35	4
sp|P17136|RSMB_RAT;sp|P63164|RSMN_RAT	ENSRNOG00000006961;ENSRNOG00000059764	Snrpb;Snrpn	2
sp|P18422|PSA3_RAT	ENSRNOG00000007851	Psma3;Psma3l	2
sp|P18437|HMGN2_RAT;tr|Q4KLJ0|Q4KLJ0_RAT	ENSRNOG00000051615	Hmgn2;LOC100360316	2
tr|Q6PDW2|Q6PDW2_RAT;tr|D3ZZH9|D3ZZH9_RAT;tr|D3ZPN7|D3ZPN7_RAT;tr|D3Z9G3|D3Z9G3_RAT;sp|P20280|RL21_RAT;tr|A0A0G2K267|A0A0G2K267_RAT;tr|M0RCS9|M0RCS9_RAT;tr|D3ZQ96|D3ZQ96_RAT;tr|M0R5R7|M0R5R7_RAT;tr|F1LWH4|F1LWH4_RAT;tr|D4A870|D4A870_RAT;tr|D4A7B4|D4A7B4_RAT;tr|D3ZRA9|D3ZRA9_RAT;tr|D3ZPH0|D3ZPH0_RAT;tr|D3ZMI8|D3ZMI8_RAT;tr|D3ZLH3|D3ZLH3_RAT;tr|D3ZE97|D3ZE97_RAT	ENSRNOG00000000957;ENSRNOG00000029410;ENSRNOG00000030999;ENSRNOG00000031560;ENSRNOG00000032803;ENSRNOG00000033115;ENSRNOG00000033487;ENSRNOG00000033855;ENSRNOG00000036588;ENSRNOG00000045620;ENSRNOG00000045767;ENSRNOG00000046349;ENSRNOG00000047664;ENSRNOG00000048518;ENSRNOG00000049848;ENSRNOG00000050165;ENSRNOG00000053044;ENSRNOG00000055038;ENSRNOG00000061492	AABR07012775.1;AABR07013302.1;AABR07025299.1;AABR07028558.1;AABR07030162.1;AABR07034641.1;AABR07037412.1;AABR07038464.1;AABR07043626.1;AABR07052953.1;AABR07062466.1;AABR07067829.1;AABR07069587.1;AABR07070238.2;AC121209.1;Rpl21	16
sp|P20650|PPM1A_RAT;sp|P35815|PPM1B_RAT;tr|Q642F2|Q642F2_RAT;sp|P35815-2|PPM1B_RAT;tr|A0A0G2K7C6|A0A0G2K7C6_RAT;tr|Q99ND8|Q99ND8_RAT;tr|A0A0H2UHE5|A0A0H2UHE5_RAT	ENSRNOG00000005916;ENSRNOG00000030667	Ppm1a;Ppm1b	2
sp|P20760|IGG2A_RAT;sp|P20759|IGHG1_RAT;tr|F1LN61|F1LN61_RAT;tr|A0A0G2K9Y0|A0A0G2K9Y0_RAT;tr|F1LPQ6|F1LPQ6_RAT	ENSRNOG00000030332;ENSRNOG00000034190	Ighg1;Ighm	2
tr|F1LQS3|F1LQS3_RAT;sp|P21533|RL6_RAT;tr|A0A0G2KBA1|A0A0G2KBA1_RAT	ENSRNOG00000025936;ENSRNOG00000055942	AC120310.1;Rpl6	2
tr|D3ZJE2|D3ZJE2_RAT;sp|P23358|RL12_RAT;tr|A0A140TAC5|A0A140TAC5_RAT;tr|M0R4B6|M0R4B6_RAT		LOC102555453;Rpl12	2
tr|A0A0G2K531|A0A0G2K531_RAT;sp|P23764|GPX3_RAT;tr|A0A0G2JXN4|A0A0G2JXN4_RAT;tr|D3ZH29|D3ZH29_RAT;sp|Q64625|GPX6_RAT	ENSRNOG00000052564;ENSRNOG00000060749	Gpx3;Gpx6	2
sp|P24049|RL17_RAT;tr|A0A0H2UHQ1|A0A0H2UHQ1_RAT;tr|F1LZX7|F1LZX7_RAT;tr|A0A0G2KB77|A0A0G2KB77_RAT;tr|D3Z9G9|D3Z9G9_RAT	ENSRNOG00000018680;ENSRNOG00000022022;ENSRNOG00000029262	AABR07053166.1;AC128967.1;Rpl17	3
tr|F1LM19|F1LM19_RAT;sp|P24090|FETUA_RAT;tr|Q7TP75|Q7TP75_RAT	ENSRNOG00000038370	AABR07034632.1;Ahsg	2
tr|A0A0G2KB28|A0A0G2KB28_RAT;tr|A0A0U1RVI9|A0A0U1RVI9_RAT;tr|D3ZIY7|D3ZIY7_RAT;sp|P27952|RS2_RAT;tr|O55213|O55213_RAT;tr|E9PT76|E9PT76_RAT;tr|D3ZQW7|D3ZQW7_RAT;tr|D3ZT78|D3ZT78_RAT;tr|M0RAJ8|M0RAJ8_RAT	ENSRNOG00000003401;ENSRNOG00000014179;ENSRNOG00000017167;ENSRNOG00000020641;ENSRNOG00000022934;ENSRNOG00000030174;ENSRNOG00000033244;ENSRNOG00000037380	AABR07029195.1;AABR07033851.1;AABR07042903.1;AABR07066818.1;AABR07069969.1;AC115384.1;AC136661.1;Rps2	8
sp|P29314|RS9_RAT;tr|A0A0G2K4C4|A0A0G2K4C4_RAT;tr|D3ZV50|D3ZV50_RAT;tr|M0RB65|M0RB65_RAT	ENSRNOG00000039203;ENSRNOG00000058909	AABR07040892.1;Rps9;Rps9l1	3
sp|P30904|MIF_RAT;tr|D3ZE63|D3ZE63_RAT		AC127887.1;Mif	2
tr|A0A0G2JYB0|A0A0G2JYB0_RAT;sp|P35284|RAB12_RAT;tr|D4A376|D4A376_RAT	ENSRNOG00000019295;ENSRNOG00000054609	AABR07002683.1;Rab12	2
sp|P35435|ATPG_RAT;tr|Q6PCU0|Q6PCU0_RAT;tr|Q6QI09|Q6QI09_RAT	ENSRNOG00000019223	Atp5f1c;Taf3	2
sp|P36876|2ABA_RAT;tr|Z4YNW7|Z4YNW7_RAT;sp|P36877|2ABB_RAT;sp|P36877-2|2ABB_RAT;tr|A0A0G2JSQ0|A0A0G2JSQ0_RAT;sp|P56932|2ABD_RAT;tr|A0A0G2K165|A0A0G2K165_RAT	ENSRNOG00000011158;ENSRNOG00000016940;ENSRNOG00000018851	Ppp2r2a;Ppp2r2b;Ppp2r2d	3
tr|Q66HM7|Q66HM7_RAT;sp|P38656|LA_RAT;tr|D3ZLH9|D3ZLH9_RAT	ENSRNOG00000007998;ENSRNOG00000011606	AABR07061825.1;Ssb	2
tr|M0RCN1|M0RCN1_RAT;tr|D4A1Q0|D4A1Q0_RAT;tr|A0A140TAI6|A0A140TAI6_RAT;sp|P39032|RL36_RAT;tr|D3ZZ95|D3ZZ95_RAT;tr|D3ZJJ6|D3ZJJ6_RAT;tr|F1M706|F1M706_RAT	ENSRNOG00000002340;ENSRNOG00000029560;ENSRNOG00000029988;ENSRNOG00000031947;ENSRNOG00000033473;ENSRNOG00000055777	AABR07007675.1;AABR07064980.1;AABR07071986.1;AABR07072272.1;LOC100361079;Rpl36	6
sp|P39069|KAD1_RAT;tr|A0A0G2K7Q6|A0A0G2K7Q6_RAT	ENSRNOG00000049056	AABR07051450.1;Ak1	2
tr|D3ZRM9|D3ZRM9_RAT;sp|P41123|RL13_RAT;tr|A0A0G2JYG9|A0A0G2JYG9_RAT;tr|F1M2E9|F1M2E9_RAT;tr|D3ZD02|D3ZD02_RAT	ENSRNOG00000015335;ENSRNOG00000029227;ENSRNOG00000059545	AABR07054469.1;AC114446.1;Rpl13	3
sp|P47727|CBR1_RAT;tr|M0R3X6|M0R3X6_RAT;tr|A0A0G2JSV2|A0A0G2JSV2_RAT;tr|A0A0G2K658|A0A0G2K658_RAT;tr|A0A096MJ24|A0A096MJ24_RAT	ENSRNOG00000049693;ENSRNOG00000049911	Cbr1;LOC102556347	2
sp|P48500|TPIS_RAT;tr|A0A0G2JWJ4|A0A0G2JWJ4_RAT;tr|A0A0G2JWU1|A0A0G2JWU1_RAT	ENSRNOG00000015290;ENSRNOG00000055222	AC094212.1;Tpi1	2
tr|Q6P727|Q6P727_RAT;tr|A0A0G2JYS4|A0A0G2JYS4_RAT;tr|D4A5V8|D4A5V8_RAT;sp|P49186-2|MK09_RAT;sp|P49186|MK09_RAT;tr|A0A0U1RRS7|A0A0U1RRS7_RAT;sp|P49187-2|MK10_RAT;tr|A0A0U1RVI2|A0A0U1RVI2_RAT;sp|P49187|MK10_RAT	ENSRNOG00000002079;ENSRNOG00000002823	Mapk10;Mapk9	2
sp|P51583|PUR6_RAT;tr|F8WFR8|F8WFR8_RAT;tr|A0A0G2K5S4|A0A0G2K5S4_RAT	ENSRNOG00000002101;ENSRNOG00000056398	AABR07036855.1;Paics	2
sp|P52925|HMGB2_RAT;tr|D3ZS25|D3ZS25_RAT	ENSRNOG00000013167;ENSRNOG00000029107;ENSRNOG00000033321	AABR07015743.1;Hmgb2;Hmgb2l1	3
sp|P54313|GBB2_RAT;sp|O35353|GBB4_RAT	ENSRNOG00000001409;ENSRNOG00000011070	Gnb2;Gnb4	2
sp|P63259|ACTG_RAT;sp|P60711|ACTB_RAT;tr|A0A0G2K3K2|A0A0G2K3K2_RAT	ENSRNOG00000034254;ENSRNOG00000036701;ENSRNOG00000053452	Actb;Actg1;LOC100361457	3
tr|A0A0H2UHG7|A0A0H2UHG7_RAT;tr|D3ZZK1|D3ZZK1_RAT;tr|A0A0G2K6L6|A0A0G2K6L6_RAT;sp|P60868|RS20_RAT;tr|A0A0G2JY70|A0A0G2JY70_RAT	ENSRNOG00000008555;ENSRNOG00000029627;ENSRNOG00000029843;ENSRNOG00000030345;ENSRNOG00000030596;ENSRNOG00000054540;ENSRNOG00000059138;ENSRNOG00000061454	AABR07043775.1;AABR07043776.1;AABR07070957.1;AC121204.2;LOC100359951;LOC100362149;LOC100362684;Rps20	8
tr|A0A0G2JV81|A0A0G2JV81_RAT;sp|P84079|ARF1_RAT;sp|P61206|ARF3_RAT;tr|A0A0G2K9H8|A0A0G2K9H8_RAT;tr|A0A0G2K4Q4|A0A0G2K4Q4_RAT;sp|P84082|ARF2_RAT	ENSRNOG00000004807;ENSRNOG00000054775;ENSRNOG00000057515;ENSRNOG00000060229	AABR07046136.1;Arf1;Arf2;Arf3;Fkbp11	5
sp|P61354|RL27_RAT;tr|M0R7P0|M0R7P0_RAT	ENSRNOG00000020674;ENSRNOG00000053282;ENSRNOG00000060888	AABR07070594.1;AABR07070689.2;Rpl27	3
sp|P62083|RS7_RAT	ENSRNOG00000008551;ENSRNOG00000027694	LOC100362830;Rps7	2
tr|A0A0G2JYS8|A0A0G2JYS8_RAT;sp|P62138|PP1A_RAT;sp|P63088|PP1G_RAT;tr|A0A0G2JVK2|A0A0G2JVK2_RAT;sp|P63088-2|PP1G_RAT	ENSRNOG00000001269;ENSRNOG00000018708	Ppp1ca;Ppp1cc	2
sp|P62243|RS8_RAT;tr|M0R7Q5|M0R7Q5_RAT;tr|D3ZIE1|D3ZIE1_RAT;tr|Q6TXJ0|Q6TXJ0_RAT	ENSRNOG00000007238;ENSRNOG00000054626	LOC297756;Rps8	2
tr|D3ZLL8|D3ZLL8_RAT;sp|P62246|RS15A_RAT;tr|A0A0G2K6I0|A0A0G2K6I0_RAT;tr|A0A0G2JYA6|A0A0G2JYA6_RAT	ENSRNOG00000018320;ENSRNOG00000042940	AC135389.1;Rps15a	2
tr|A0A0H2UHT6|A0A0H2UHT6_RAT;tr|D3ZM33|D3ZM33_RAT;sp|P62271|RS18_RAT;tr|A0A0G2KA79|A0A0G2KA79_RAT;tr|M0R5K9|M0R5K9_RAT;tr|D3ZAU6|D3ZAU6_RAT	ENSRNOG00000014169;ENSRNOG00000028505;ENSRNOG00000030107;ENSRNOG00000032944;ENSRNOG00000033152;ENSRNOG00000033451	AABR07042892.1;AABR07049320.1;AABR07049329.1;AABR07057460.1;Rps18;Rps18l1	6
sp|P62278|RS13_RAT;tr|M0RCY2|M0RCY2_RAT	ENSRNOG00000028021;ENSRNOG00000048698	AABR07048031.1;LOC684988;Rps13	3
tr|F1M013|F1M013_RAT;tr|D3ZU22|D3ZU22_RAT;sp|P62425|RL7A_RAT;tr|D3ZPL5|D3ZPL5_RAT;tr|M0R3M3|M0R3M3_RAT;tr|F1M1M2|F1M1M2_RAT;tr|F1M4C7|F1M4C7_RAT;tr|D4A6B9|D4A6B9_RAT;tr|D3ZNA3|D3ZNA3_RAT;tr|D3ZJH5|D3ZJH5_RAT	ENSRNOG00000028826;ENSRNOG00000029130;ENSRNOG00000029310;ENSRNOG00000029423;ENSRNOG00000031532;ENSRNOG00000031902;ENSRNOG00000033843;ENSRNOG00000047737;ENSRNOG00000049097	AABR07007121.1;AABR07018167.1;AABR07027819.1;AABR07049918.1;AABR07052519.1;AABR07057586.1;AC128901.1;Rpl7a	8
tr|M0R757|M0R757_RAT;sp|P62630|EF1A1_RAT;tr|F1M6C2|F1M6C2_RAT	ENSRNOG00000009439;ENSRNOG00000029996	AABR07054368.1;Eef1a1	2
tr|X1WI37|X1WI37_RAT;sp|P62703|RS4X_RAT;tr|A0A0H2UHX3|A0A0H2UHX3_RAT;tr|D3ZX01|D3ZX01_RAT	ENSRNOG00000003201;ENSRNOG00000031041	Rps4x;Rps4y2	2
tr|A0A0G2JYA4|A0A0G2JYA4_RAT;sp|P63331|PP2AA_RAT;sp|P62716|PP2AB_RAT	ENSRNOG00000005389;ENSRNOG00000015182	Ppp2ca;Ppp2cb	2
tr|F1LT35|F1LT35_RAT;tr|D3ZTH8|D3ZTH8_RAT;sp|P62752|RL23A_RAT;tr|D3ZSR8|D3ZSR8_RAT;tr|D3ZNM1|D3ZNM1_RAT;tr|D4AAL7|D4AAL7_RAT;tr|D3ZTX9|D3ZTX9_RAT;tr|D3ZFK7|D3ZFK7_RAT	ENSRNOG00000023344;ENSRNOG00000028963;ENSRNOG00000029859;ENSRNOG00000032148;ENSRNOG00000032771;ENSRNOG00000033439	AABR07015476.1;AABR07018050.1;AABR07021384.1;AABR07061838.1;AABR07064811.1;Rpl23a	6
sp|P62804|H4_RAT		Hist1h2ao;Hist1h4b;Hist1h4m;Hist2h4	4
sp|P62828|RAN_RAT;tr|Q66H11|Q66H11_RAT;sp|Q8K586|RANT_RAT	ENSRNOG00000000938;ENSRNOG00000031013;ENSRNOG00000032913	Ran;Rasl2-9;RGD1306195	3
sp|P62845|RS15_RAT;tr|D3ZAK6|D3ZAK6_RAT	ENSRNOG00000024603;ENSRNOG00000043026	AC128207.2;Rps15	2
sp|P62850-2|RS24_RAT;tr|A0A0H2UHH9|A0A0H2UHH9_RAT;sp|P62850-3|RS24_RAT;tr|D4ACJ1|D4ACJ1_RAT;sp|P62850|RS24_RAT;tr|D3ZFZ8|D3ZFZ8_RAT	ENSRNOG00000010189;ENSRNOG00000046517	AC099108.1;Rps24	2
tr|D3Z8D7|D3Z8D7_RAT;tr|A0A0G2K743|A0A0G2K743_RAT;sp|P62856|RS26_RAT;tr|D3ZJ54|D3ZJ54_RAT;tr|A0A0G2JY64|A0A0G2JY64_RAT;tr|A0A0G2JVP7|A0A0G2JVP7_RAT	ENSRNOG00000029512;ENSRNOG00000056280;ENSRNOG00000056532	AABR07068712.1;AC126292.3;LOC100360508;LOC100361854;Rps26	5
sp|P62870|ELOB_RAT;tr|F1M937|F1M937_RAT;tr|A0A140TA99|A0A140TA99_RAT;tr|F1LZ51|F1LZ51_RAT;tr|M0R6V0|M0R6V0_RAT	ENSRNOG00000004814;ENSRNOG00000007803;ENSRNOG00000033199;ENSRNOG00000046568	AABR07051791.1;AABR07068955.1;AC132539.1;Elob	4
tr|D3ZU04|D3ZU04_RAT;tr|D4ACQ2|D4ACQ2_RAT;tr|D4ABZ9|D4ABZ9_RAT;tr|D3ZZ60|D3ZZ60_RAT;sp|P62902|RL31_RAT;tr|D3ZX87|D3ZX87_RAT;tr|D3ZK34|D3ZK34_RAT;tr|D3ZKU5|D3ZKU5_RAT;tr|D3Z8W1|D3Z8W1_RAT	ENSRNOG00000013508;ENSRNOG00000029278;ENSRNOG00000030278;ENSRNOG00000030296;ENSRNOG00000033024;ENSRNOG00000039487;ENSRNOG00000050226;ENSRNOG00000050666	AABR07017576.1;AABR07021008.1;AABR07031947.1;AABR07032277.1;AABR07059675.1;AABR07071195.1;AC099453.1;Rpl31	8
sp|P62909|RS3_RAT;tr|D3ZVH2|D3ZVH2_RAT	ENSRNOG00000007605;ENSRNOG00000017418	AABR07052430.1;Rps3	2
tr|D4A6W6|D4A6W6_RAT;sp|P62919|RL8_RAT		AC129049.1;LOC100360117;Rpl8	3
tr|D4A269|D4A269_RAT;sp|P62959|HINT1_RAT	ENSRNOG00000000622;ENSRNOG00000005630	AABR07060778.1;Hint1	2
sp|P63018|HSP7C_RAT;tr|M0RCB1|M0RCB1_RAT;tr|D4A4S3|D4A4S3_RAT;tr|F1LZI1|F1LZI1_RAT;tr|A0A0G2JVI3|A0A0G2JVI3_RAT	ENSRNOG00000034066;ENSRNOG00000034093;ENSRNOG00000061099	AABR07011951.1;AABR07033324.1;Hspa8	3
sp|P63159|HMGB1_RAT;tr|D3ZCR3|D3ZCR3_RAT;tr|A0A0G2K6P4|A0A0G2K6P4_RAT;tr|D3ZLG3|D3ZLG3_RAT;tr|D3ZXR5|D3ZXR5_RAT	ENSRNOG00000032550;ENSRNOG00000034130;ENSRNOG00000051482;ENSRNOG00000058908	AABR07025074.1;Hmg1l1;Hmgb1;LOC108349189	4
sp|Q78P75|DYL2_RAT;sp|P63170|DYL1_RAT	ENSRNOG00000008921;ENSRNOG00000011222	Dynll1;Dynll2	2
tr|D4AD70|D4AD70_RAT;sp|P63174|RL38_RAT;tr|D3ZW57|D3ZW57_RAT;tr|D4A862|D4A862_RAT;tr|D3ZZH2|D3ZZH2_RAT	ENSRNOG00000030747;ENSRNOG00000031434;ENSRNOG00000032847;ENSRNOG00000033484;ENSRNOG00000033808;ENSRNOG00000048701	AABR07032520.2;AABR07039377.1;AABR07060145.1;AC098064.1;LOC685963;LOC690468;Rpl38	7
sp|P63312|TYB10_RAT		LOC100364435;Tmsb10	2
tr|Q6PDW1|Q6PDW1_RAT;tr|D3ZHB3|D3ZHB3_RAT;sp|P63324|RS12_RAT;tr|D3ZV36|D3ZV36_RAT	ENSRNOG00000016411;ENSRNOG00000020093;ENSRNOG00000043412	LOC100360573;RGD1561102;Rps12	3
tr|F1LT36|F1LT36_RAT;sp|P63326|RS10_RAT;tr|Q7TP86|Q7TP86_RAT;tr|A0A0H2UI18|A0A0H2UI18_RAT;tr|D3ZH53|D3ZH53_RAT;tr|D3ZCN9|D3ZCN9_RAT;tr|D3ZJY5|D3ZJY5_RAT		AABR07017250.1;AABR07057264.1;AABR07063995.1;Rps10;Rps10l1	5
sp|P63329-2|PP2BA_RAT;sp|P63329|PP2BA_RAT;tr|A0A0G2K7T5|A0A0G2K7T5_RAT;sp|P20651|PP2BB_RAT	ENSRNOG00000009882;ENSRNOG00000054782	Ppp3ca;Ppp3cb	2
sp|P68035|ACTC_RAT;sp|P68136|ACTS_RAT	ENSRNOG00000008536;ENSRNOG00000017786	Acta1;Actc1	2
sp|P68370|TBA1A_RAT;sp|Q68FR8|TBA3_RAT	ENSRNOG00000031707;ENSRNOG00000032967;ENSRNOG00000060728	Tuba1a;Tuba3a;Tuba3b	3
tr|E9PU07|E9PU07_RAT;tr|Q5GAM2|Q5GAM2_RAT;sp|P70709|ECP_RAT	ENSRNOG00000025515;ENSRNOG00000031445;ENSRNOG00000050295;ENSRNOG00000053457	Ear1;LOC100361866;Rnase17;Rnase3	4
sp|P82808|GFPT1_RAT;tr|A0A0G2KB56|A0A0G2KB56_RAT;sp|Q4KMC4|GFPT2_RAT	ENSRNOG00000002810;ENSRNOG00000018507	Gfpt1;Gfpt2	2
sp|P83888|TBG1_RAT;tr|F1LUW9|F1LUW9_RAT	ENSRNOG00000006494;ENSRNOG00000020213	Tubg1;Tubg2	2
tr|M0RBX6|M0RBX6_RAT;tr|D3ZK97|D3ZK97_RAT;tr|D3ZJ08|D3ZJ08_RAT;sp|Q6LED0|H31_RAT;sp|P84245|H33_RAT;tr|A0A0G2K0N8|A0A0G2K0N8_RAT		AABR07027811.2;AC119603.1;H3c1;H3c13;H3f3a;H3f3b;H3f3c;Hist1h2ail1;Hist1h3b;Hist2h3c2;LOC102548682;LOC102549173	12
sp|P85108|TBB2A_RAT;sp|Q3KRE8|TBB2B_RAT	ENSRNOG00000017445;ENSRNOG00000017558	Tubb2a;Tubb2b	2
sp|P85968|6PGD_RAT;tr|A0A0G2K7Q8|A0A0G2K7Q8_RAT	ENSRNOG00000057626	Kif1b;Pgd	2
tr|F1LNP2|F1LNP2_RAT;sp|P97711|GRK6_RAT;tr|A0A0G2K6E5|A0A0G2K6E5_RAT;tr|Q66HL7|Q66HL7_RAT;sp|Q62833|GRK5_RAT	ENSRNOG00000011439;ENSRNOG00000014615	Grk5;Grk6	2
tr|A0A096MJJ0|A0A096MJJ0_RAT;tr|Q6IMX5|Q6IMX5_RAT;tr|F7F5B5|F7F5B5_RAT;tr|D4A8Z2|D4A8Z2_RAT;tr|A0A0G2JYC5|A0A0G2JYC5_RAT;tr|A0A096MJ39|A0A096MJ39_RAT;sp|Q07969|CD36_RAT	ENSRNOG00000043176	AABR07059308.1;Cd36	2
sp|Q27W02|MGN_RAT;tr|F1M0X6|F1M0X6_RAT	ENSRNOG00000010316;ENSRNOG00000012778	Magoh;Magohb	2
tr|A0A096MJL2|A0A096MJL2_RAT;tr|M0R8A4|M0R8A4_RAT;sp|Q3B8Q0|MARE2_RAT;tr|M0R7M8|M0R7M8_RAT;tr|A0A096MJC9|A0A096MJC9_RAT	ENSRNOG00000047261;ENSRNOG00000049681	AABR07031445.1;AABR07031491.2;Mapre2	3
sp|Q4AEF8|COPG1_RAT;tr|A0A0G2K1F3|A0A0G2K1F3_RAT	ENSRNOG00000010474	Copg1;Hmces	2
sp|Q4KLL0|TCEA1_RAT	ENSRNOG00000022323	LOC498453;Tcea1	2
sp|Q4QQW4|HDAC1_RAT;tr|D3ZVU7|D3ZVU7_RAT	ENSRNOG00000009568;ENSRNOG00000013695	Hdac1;Hdac1l	2
sp|Q561S0|NDUAA_RAT;tr|A0A1W2Q6F8|A0A1W2Q6F8_RAT	ENSRNOG00000016470;ENSRNOG00000062245	Ndufa10;Ndufa10l1	2
sp|Q5EB94|MYZAP_RAT;tr|H8Y6S5|H8Y6S5_RAT	ENSRNOG00000057676	Myzap;Polr2m	2
sp|Q5FVQ4|MLEC_RAT;tr|A0A0G2K121|A0A0G2K121_RAT	ENSRNOG00000021725	Mlec;Unc119b	2
sp|Q5HZV9|PP1R7_RAT;tr|R9PXV7|R9PXV7_RAT	ENSRNOG00000016974	AABR07068351.1;Ppp1r7	2
sp|Q5XIC0|ECI2_RAT;tr|Q5M884|Q5M884_RAT;tr|A0A0G2K277|A0A0G2K277_RAT	ENSRNOG00000029549	Eci2;Eci3	2
sp|Q5XIF6|TBA4A_RAT;sp|Q6AY56|TBA8_RAT	ENSRNOG00000003597;ENSRNOG00000048169	Tuba4a;Tuba8	2
sp|Q62969|PTGIS_RAT;tr|F1LP67|F1LP67_RAT;tr|A0A0G2K776|A0A0G2K776_RAT	ENSRNOG00000008245	AABR07054614.1;Ptgis	2
sp|Q63413|DX39B_RAT;tr|A0A0G2KAT4|A0A0G2KAT4_RAT;sp|Q5U216|DX39A_RAT	ENSRNOG00000000841;ENSRNOG00000004373	Ddx39a;Ddx39b	2
tr|F1LSW7|F1LSW7_RAT;sp|Q63507|RL14_RAT;tr|B5DEM5|B5DEM5_RAT;tr|Q6TUH8|Q6TUH8_RAT	ENSRNOG00000019007;ENSRNOG00000031061	LOC306079;Rpl14	2
tr|A0A0G2K3Z9|A0A0G2K3Z9_RAT;sp|Q63716|PRDX1_RAT	ENSRNOG00000017194;ENSRNOG00000017695	AABR07012795.1;Prdx1	2
tr|M0RD20|M0RD20_RAT;sp|Q64537|CPNS1_RAT;tr|A0A0G2K6H7|A0A0G2K6H7_RAT	ENSRNOG00000060312	Capns1;LOC108348197	2
sp|Q6P791|LTOR1_RAT	ENSRNOG00000020016	Lamtor1;LOC100361543	2
sp|Q6P9T8|TBB4B_RAT;tr|G3V7C6|G3V7C6_RAT;tr|B4F7C2|B4F7C2_RAT	ENSRNOG00000010170;ENSRNOG00000047505	Tubb4a;Tubb4b	2
sp|Q6URK4-2|ROA3_RAT;tr|E9PSU5|E9PSU5_RAT;tr|D4A6A2|D4A6A2_RAT	ENSRNOG00000038905;ENSRNOG00000052968	AABR07048397.1;Hnrnpa3	2
sp|Q7M0E3|DEST_RAT;tr|D4A315|D4A315_RAT	ENSRNOG00000005924;ENSRNOG00000026891	AC093995.1;Dstn	2
tr|A0A0G2JU07|A0A0G2JU07_RAT;sp|Q7M767|UB2V2_RAT;tr|D3ZFY8|D3ZFY8_RAT	ENSRNOG00000001829;ENSRNOG00000025580	LOC679539;Ube2v1;Ube2v2	3
sp|Q7TP54|RIPR2_RAT;tr|M0R6L9|M0R6L9_RAT;sp|P02793|FRIL1_RAT;tr|M0R5T8|M0R5T8_RAT;tr|M0R597|M0R597_RAT;tr|M0RCS3|M0RCS3_RAT;tr|F1M5T1|F1M5T1_RAT	ENSRNOG00000004662;ENSRNOG00000018804;ENSRNOG00000020843;ENSRNOG00000029082;ENSRNOG00000031506;ENSRNOG00000031540;ENSRNOG00000033776;ENSRNOG00000034150	AABR07005031.1;AABR07041778.1;AC115277.1;Ftl1;LOC100359668;LOC100360087;LOC100362384;Ripor2	8
sp|Q8VIF7|SBP1_RAT;tr|F1LRJ9|F1LRJ9_RAT	ENSRNOG00000047158;ENSRNOG00000053812	LOC103689947;Selenbp1	2
sp|Q923W4|HDGR3_RAT;tr|A0A0G2JYC7|A0A0G2JYC7_RAT;sp|Q925G1-2|HDGR2_RAT;sp|Q925G1|HDGR2_RAT	ENSRNOG00000019740;ENSRNOG00000049142	Hdgfl2;Hdgfl3	2
tr|A0A0G2K9Y5|A0A0G2K9Y5_RAT;sp|Q99PS8|HRG_RAT;tr|A0A0G2K3G0|A0A0G2K3G0_RAT	ENSRNOG00000001809	Hrg;LOC681544	2
tr|Q569C9|Q569C9_RAT;sp|Q9ERE4|GOLP3_RAT;sp|Q66H74|GLP3L_RAT;tr|A0A0G2K9Q1|A0A0G2K9Q1_RAT	ENSRNOG00000012186;ENSRNOG00000047620	Golph3;Golph3l	2
tr|A0A0G2K2T6|A0A0G2K2T6_RAT;sp|Q9JIL3|ILF3_RAT;tr|F1LRU1|F1LRU1_RAT;sp|Q9JIL3-2|ILF3_RAT;tr|A0A0G2K4U6|A0A0G2K4U6_RAT;tr|A0A0G2K3L7|A0A0G2K3L7_RAT;tr|A0A0G2JV89|A0A0G2JV89_RAT;sp|Q9JKU6|STRBP_RAT;tr|D3ZDD7|D3ZDD7_RAT	ENSRNOG00000010150;ENSRNOG00000022741	Ilf3;Strbp	2
sp|Q9JJW3|ATPMK_RAT	ENSRNOG00000020296;ENSRNOG00000042869	Atp5mk;LOC103693430	2
tr|A0A0H2UHP9|A0A0H2UHP9_RAT;sp|Q9WVB1|RAB6A_RAT;tr|A0A0G2JT78|A0A0G2JT78_RAT	ENSRNOG00000009198;ENSRNOG00000018176	Rab6a;Rab6b	2
tr|A0A0G2JTW1|A0A0G2JTW1_RAT;sp|P61227|RAP2B_RAT	ENSRNOG00000014420;ENSRNOG00000051564	Rap2a;Rap2b	2
tr|F7EPH4|F7EPH4_RAT;tr|A0A0G2JUD2|A0A0G2JUD2_RAT	ENSRNOG00000000557	Ppa1;Sar1a	2
tr|B4F7C9|B4F7C9_RAT;tr|A0A0G2JWH5|A0A0G2JWH5_RAT	ENSRNOG00000031896	Chek1;Stt3a	2
tr|F1M9D6|F1M9D6_RAT;tr|A0A0G2JX93|A0A0G2JX93_RAT	ENSRNOG00000014079	Stat1;Stat4	2
tr|M0R4L7|M0R4L7_RAT;tr|G3V9C7|G3V9C7_RAT;tr|G3V8B3|G3V8B3_RAT;tr|D3ZWM5|D3ZWM5_RAT;tr|A0A0G2JXE0|A0A0G2JXE0_RAT;tr|D3ZNH4|D3ZNH4_RAT;tr|A0A0G2JXI9|A0A0G2JXI9_RAT;sp|Q00715|H2B1_RAT;tr|D3ZLY9|D3ZLY9_RAT;sp|Q00729|H2B1A_RAT	ENSRNOG00000016865;ENSRNOG00000021198;ENSRNOG00000047776;ENSRNOG00000053845;ENSRNOG00000054296;ENSRNOG00000055512;ENSRNOG00000058187;ENSRNOG00000058263;ENSRNOG00000059382;ENSRNOG00000059949;ENSRNOG00000060769	H2bc1;H2bc12;H2bc9;Hist1h2bc;Hist1h2bd;Hist1h2bg;Hist1h2bl;Hist1h2bo;Hist1h2bq;LOC100364835;LOC100365043;LOC100910200;LOC102549061;LOC684797	14
tr|E9PSS8|E9PSS8_RAT;tr|Q6MGB9|Q6MGB9_RAT;tr|A0A0G2K1E1|A0A0G2K1E1_RAT;tr|D3ZKI0|D3ZKI0_RAT;tr|F1M9F3|F1M9F3_RAT	ENSRNOG00000038999;ENSRNOG00000059770	AABR07044383.1;RT1-A1	2
tr|A0A0G2KAG3|A0A0G2KAG3_RAT;tr|A0A0G2K2R1|A0A0G2K2R1_RAT;tr|Q8R2H0|Q8R2H0_RAT;tr|B2GUV5|B2GUV5_RAT	ENSRNOG00000000840;ENSRNOG00000008163	Atp6v1g1;Atp6v1g2	2
tr|A0A0G2K3C6|A0A0G2K3C6_RAT;sp|P30713|GSTT2_RAT	ENSRNOG00000052415	Gstt2;LOC103694879	2
tr|A0A0G2K4U2|A0A0G2K4U2_RAT	ENSRNOG00000018937	Gstm2;Gstm7	2
tr|A0A0G2K719|A0A0G2K719_RAT;tr|D3ZN21|D3ZN21_RAT;tr|D4ADE8|D4ADE8_RAT	ENSRNOG00000002501;ENSRNOG00000023383	Ddx3x;Ddx3y	2
tr|D3ZJW3|D3ZJW3_RAT;tr|A0A0G2K781|A0A0G2K781_RAT;tr|G3V9H6|G3V9H6_RAT;tr|A0A0G2K383|A0A0G2K383_RAT	ENSRNOG00000019667;ENSRNOG00000031709	Ppfibp1;Ppfibp2	2
tr|A0A0G2K9Y7|A0A0G2K9Y7_RAT	ENSRNOG00000015438	Ces1f;LOC501233	2
tr|B0K008|B0K008_RAT;tr|F1LWP8|F1LWP8_RAT;tr|B5DFN1|B5DFN1_RAT	ENSRNOG00000018848;ENSRNOG00000033125;ENSRNOG00000033765	AABR07062694.1;Eif1;Eif1b	3
tr|B5DEP7|B5DEP7_RAT;tr|A0A0G2K3V8|A0A0G2K3V8_RAT	ENSRNOG00000016507;ENSRNOG00000032232;ENSRNOG00000058521	AABR07042226.1;LOC687679;Snrpg	3
tr|F1LZC5|F1LZC5_RAT;tr|D3ZE15|D3ZE15_RAT	ENSRNOG00000020602;ENSRNOG00000021688	AABR07056686.1;Ndufa13	2
tr|D4A817|D4A817_RAT;tr|M0RBQ5|M0RBQ5_RAT;tr|D3ZNZ9|D3ZNZ9_RAT	ENSRNOG00000031790;ENSRNOG00000043419;ENSRNOG00000045753	H2bu1;Hist2h2be;Hist3h2ba	3
tr|Q5U3Y8|Q5U3Y8_RAT;tr|M0R5M7|M0R5M7_RAT;tr|A0A0G2K5C5|A0A0G2K5C5_RAT	ENSRNOG00000016912;ENSRNOG00000029243;ENSRNOG00000031864	AABR07021871.1;AABR07058578.1;Btf3	3
tr|Q5RJK5|Q5RJK5_RAT;tr|D3ZRS6|D3ZRS6_RAT	ENSRNOG00000011814;ENSRNOG00000030902	AABR07062138.1;Cbx3	2
tr|Q6PDV8|Q6PDV8_RAT;sp|P47198|RL22_RAT	ENSRNOG00000011104;ENSRNOG00000028747	LOC100360057;Rpl22	2
tr|D4ACV3|D4ACV3_RAT;tr|M0RDM4|M0RDM4_RAT;sp|A9UMV8|H2AJ_RAT;tr|Q6I8Q6|Q6I8Q6_RAT;tr|M0RCL5|M0RCL5_RAT;tr|G3V9C0|G3V9C0_RAT;tr|D3ZVK7|D3ZVK7_RAT;sp|Q64598|H2A1F_RAT;sp|Q4FZT6|H2A3_RAT;sp|Q00728|H2A4_RAT;sp|P0CC09|H2A2A_RAT;sp|P0C170|H2A1E_RAT;sp|P0C169|H2A1C_RAT;sp|P02262|H2A1_RAT;tr|A0A0A0MXW3|A0A0A0MXW3_RAT;tr|D4AEC0|D4AEC0_RAT;sp|P0C0S7|H2AZ_RAT;tr|D3ZXP3|D3ZXP3_RAT		H2ac1;H2ac4;H2aj;H2ax;H2az1;H2az2;Hist1h2ac;Hist1h2af;Hist1h2ah;Hist1h2ai;hist1h2ail2;Hist1h2an;Hist2h2aa2;Hist2h2aa3;Hist3h2a;LOC100910554;LOC103690190;LOC684773	18
sp|P81795|IF2G_RAT;sp|C9WPN6|IF2H_RAT	ENSRNOG00000060048;ENSRNOG00000060793	Eif2s3;Eif2s3y	2
sp|D4A055-1|CACB4_RAT;sp|D4A055|CACB4_RAT;tr|G3V6K8|G3V6K8_RAT;sp|P54283|CACB1_RAT;tr|A0A0G2JSZ0|A0A0G2JSZ0_RAT;sp|Q8VGC3-2|CACB2_RAT;sp|Q8VGC3-5|CACB2_RAT;tr|D3ZWK0|D3ZWK0_RAT;sp|Q8VGC3-4|CACB2_RAT;sp|Q8VGC3-3|CACB2_RAT;tr|A0A0G2K4U4|A0A0G2K4U4_RAT;sp|Q8VGC3|CACB2_RAT	ENSRNOG00000004518;ENSRNOG00000007666;ENSRNOG00000018378	Cacnb1;Cacnb2;Cacnb4	3
sp|M0RC99|RAB5A_RAT	ENSRNOG00000057056	Rab5a;Rab5al1	2
sp|O08838|AMPH_RAT;tr|A0A0G2JX32|A0A0G2JX32_RAT;tr|F1LPP0|F1LPP0_RAT;tr|A0A0G2K5Z4|A0A0G2K5Z4_RAT	ENSRNOG00000012490	AABR07027870.1;Amph	2
sp|O35509|RB11B_RAT;tr|A0A0G2JZR4|A0A0G2JZR4_RAT;sp|P62494|RB11A_RAT	ENSRNOG00000007648;ENSRNOG00000011302	Rab11a;Rab11b	2
tr|A0A1W2Q6E9|A0A1W2Q6E9_RAT;tr|A0A096MK30|A0A096MK30_RAT;sp|O35763|MOES_RAT;tr|A0A0G2K890|A0A0G2K890_RAT;sp|P31977|EZRI_RAT	ENSRNOG00000018524;ENSRNOG00000030118	Ezr;Msn	2
sp|O88377|PI42B_RAT;sp|Q9R0I8|PI42A_RAT	ENSRNOG00000013030	Pip4k2a;Pip4k2b	2
sp|P01946|HBA_RAT	ENSRNOG00000029886;ENSRNOG00000047321	Hba-a1;Hba-a2	2
tr|M0R6L9|M0R6L9_RAT;tr|M0R5T8|M0R5T8_RAT;sp|P02793|FRIL1_RAT;tr|M0R597|M0R597_RAT;sp|Q7TP54|RIPR2_RAT;tr|M0RCS3|M0RCS3_RAT;tr|F1M5T1|F1M5T1_RAT	ENSRNOG00000004662;ENSRNOG00000018804;ENSRNOG00000020843;ENSRNOG00000029082;ENSRNOG00000031506;ENSRNOG00000031540;ENSRNOG00000033776;ENSRNOG00000034150	AABR07005031.1;AABR07041778.1;AC115277.1;Ftl1;LOC100359668;LOC100360087;LOC100362384;Ripor2	8
tr|A0A0H2UHQ8|A0A0H2UHQ8_RAT;tr|D3ZFA8|D3ZFA8_RAT;sp|P04644|RS17_RAT;tr|D3ZKG6|D3ZKG6_RAT;tr|D3ZHU9|D3ZHU9_RAT	ENSRNOG00000019106;ENSRNOG00000032765;ENSRNOG00000045885;ENSRNOG00000048927	AABR07018533.1;AABR07068536.1;LOC100365810;Rps17	4
tr|M0R5J4|M0R5J4_RAT;sp|P04764|ENOA_RAT	ENSRNOG00000017895;ENSRNOG00000028543	AABR07052523.1;Eno1	2
sp|P04797|G3P_RAT;tr|M0R590|M0R590_RAT;tr|D3ZGY4|D3ZGY4_RAT;tr|M0R660|M0R660_RAT	ENSRNOG00000018630;ENSRNOG00000033057;ENSRNOG00000050630	AABR07025010.1;AABR07070043.1;Gapdh;LOC108351137	4
sp|P05065|ALDOA_RAT;tr|Q6AY07|Q6AY07_RAT	ENSRNOG00000030869;ENSRNOG00000052802	Aldoa;Aldoart2	2
sp|P08009|GSTM7_RAT;tr|A0A0G2K4U2|A0A0G2K4U2_RAT	ENSRNOG00000018937	Gstm2;Gstm7	2
sp|P09895|RL5_RAT;tr|D3ZHP8|D3ZHP8_RAT	ENSRNOG00000023529;ENSRNOG00000037220	AABR07031089.1;Rpl5	2
sp|P62986|RL40_RAT;tr|F1LU69|F1LU69_RAT;sp|P62982|RS27A_RAT;sp|P0CG51|UBB_RAT;tr|F1LML2|F1LML2_RAT;sp|Q63429|UBC_RAT	ENSRNOG00000004426;ENSRNOG00000019974;ENSRNOG00000057823	Rps27a;Uba52;Ubc	3
sp|P0DP31|CALM3_RAT;sp|P0DP30|CALM2_RAT;sp|P0DP29|CALM1_RAT;tr|D4ABV5|D4ABV5_RAT	ENSRNOG00000004060;ENSRNOG00000016770;ENSRNOG00000030871	Calm1;Calm2;Calm3	3
sp|P10111|PPIA_RAT;tr|A0A0G2K1P0|A0A0G2K1P0_RAT;tr|A0A0G2K2E4|A0A0G2K2E4_RAT	ENSRNOG00000027864;ENSRNOG00000031045;ENSRNOG00000055068	LOC100911252;Ppia;Ppial4d	3
sp|P11517|HBB2_RAT	ENSRNOG00000047098;ENSRNOG00000061299	Hbb-bs;LOC100134871	2
sp|P12711|ADHX_RAT;tr|Q7TQ90|Q7TQ90_RAT	ENSRNOG00000046357	Adh4;Adh5	2
tr|G3V6I9|G3V6I9_RAT;tr|D4A1Z2|D4A1Z2_RAT;sp|P12749|RL26_RAT;tr|D4AE42|D4AE42_RAT	ENSRNOG00000004214;ENSRNOG00000032777;ENSRNOG00000039783	AABR07058519.1;AC094217.1;Rpl26	3
sp|P14046|A1I3_RAT;tr|D4AA52|D4AA52_RAT;tr|A0A0G2K926|A0A0G2K926_RAT;sp|Q03626-2|MUG1_RAT;tr|D4A6E3|D4A6E3_RAT;tr|A0A0G2JUW7|A0A0G2JUW7_RAT;sp|Q03626|MUG1_RAT;tr|A0A0G2JUP5|A0A0G2JUP5_RAT;sp|Q6IE52|MUG2_RAT	ENSRNOG00000033245;ENSRNOG00000037188	LOC297568;Mug1;Mug2	3
sp|P15431|GBRB1_RAT;sp|P63138|GBRB2_RAT	ENSRNOG00000002327;ENSRNOG00000003680	Gabrb1;Gabrb2	2
sp|P15999|ATPA_RAT;tr|F1LP05|F1LP05_RAT;tr|A0A0G2K099|A0A0G2K099_RAT	ENSRNOG00000017032;ENSRNOG00000054846	AABR07022393.1;Atp5f1a	2
tr|A0A0G2JXD0|A0A0G2JXD0_RAT;sp|P17077|RL9_RAT;tr|F1M7A9|F1M7A9_RAT	ENSRNOG00000026716;ENSRNOG00000028449;ENSRNOG00000030476;ENSRNOG00000031879;ENSRNOG00000061320	AABR07026048.1;LOC100360449;LOC100364457;LOC103692829;Rpl9	5
sp|P17105|IP3KA_RAT;sp|P42335|IP3KB_RAT	ENSRNOG00000002969;ENSRNOG00000005284	Itpka;Itpkb	2
sp|P18395|CSDE1_RAT	ENSRNOG00000046533;ENSRNOG00000061058	Csde1;LOC100364335	2
sp|P18422|PSA3_RAT	ENSRNOG00000007851	Psma3;Psma3l	2
tr|D4AAY6|D4AAY6_RAT;tr|D3ZI60|D3ZI60_RAT;tr|A0A0G2K7W6|A0A0G2K7W6_RAT;sp|P18445|RL27A_RAT	ENSRNOG00000014214;ENSRNOG00000031273;ENSRNOG00000031736	AABR07034639.1;LOC108351703;Rpl27a	3
tr|A0A0G2JSW0|A0A0G2JSW0_RAT;sp|P18666|ML12B_RAT;tr|B0BMS8|B0BMS8_RAT;sp|P13832|MRLCA_RAT;sp|Q64122|MYL9_RAT	ENSRNOG00000015278;ENSRNOG00000015733;ENSRNOG00000020246	Myl12a;Myl12b;Myl9	3
sp|P19944|RLA1_RAT	ENSRNOG00000013874	LOC100360522;Rplp1	2
tr|F1LP80|F1LP80_RAT;sp|P20156|VGF_RAT;tr|M0RDR2|M0RDR2_RAT	ENSRNOG00000001416;ENSRNOG00000053620	AABR07051069.1;Vgf	2
tr|Q6PDW2|Q6PDW2_RAT;tr|M0R5R7|M0R5R7_RAT;tr|D4A870|D4A870_RAT;tr|D4A7B4|D4A7B4_RAT;tr|D3ZPN7|D3ZPN7_RAT;tr|D3ZPH0|D3ZPH0_RAT;tr|D3ZMI8|D3ZMI8_RAT;tr|D3Z9G3|D3Z9G3_RAT;sp|P20280|RL21_RAT;tr|M0RCS9|M0RCS9_RAT;tr|F1LY43|F1LY43_RAT;tr|D3ZQ96|D3ZQ96_RAT;tr|F1LWH4|F1LWH4_RAT;tr|D3ZZH9|D3ZZH9_RAT;tr|D3ZRA9|D3ZRA9_RAT;tr|D3ZLH3|D3ZLH3_RAT;tr|D3ZE97|D3ZE97_RAT;tr|D4A4G9|D4A4G9_RAT;tr|D3ZPV5|D3ZPV5_RAT;tr…	ENSRNOG00000000957;ENSRNOG00000029410;ENSRNOG00000029824;ENSRNOG00000030999;ENSRNOG00000031560;ENSRNOG00000032803;ENSRNOG00000033115;ENSRNOG00000033487;ENSRNOG00000033855;ENSRNOG00000036588;ENSRNOG00000038458;ENSRNOG00000045620;ENSRNOG00000045767;ENSRNOG00000046349;ENSRNOG00000047664;ENSRNOG00000048518;ENSRNOG00000048656;ENSRNOG00000049248;ENSRNOG00000049848;ENSRNOG00000050165;ENSRNOG00000050799;…	AABR07007853.1;AABR07007905.1;AABR07012775.1;AABR07013302.1;AABR07025299.1;AABR07026240.1;AABR07028558.1;AABR07030162.1;AABR07034641.1;AABR07037412.1;AABR07043626.1;AABR07052953.1;AABR07062466.1;AABR07067829.1;AABR07068760.1;AABR07069587.1;AABR07070238.2;AC121209.1;AC123185.1;Rpl21	20
tr|A0A0G2KBA1|A0A0G2KBA1_RAT;tr|F1LQS3|F1LQS3_RAT;sp|P21533|RL6_RAT	ENSRNOG00000025936;ENSRNOG00000055942	AC120310.1;Rpl6	2
sp|P23358|RL12_RAT;tr|M0R4B6|M0R4B6_RAT;tr|A0A140TAC5|A0A140TAC5_RAT;tr|D3ZJE2|D3ZJE2_RAT		LOC102555453;Rpl12	2
sp|P24049|RL17_RAT;tr|A0A0H2UHQ1|A0A0H2UHQ1_RAT;tr|F1LZX7|F1LZX7_RAT;tr|D3Z9G9|D3Z9G9_RAT;tr|A0A0G2KB77|A0A0G2KB77_RAT	ENSRNOG00000018680;ENSRNOG00000022022;ENSRNOG00000029262	AABR07053166.1;AC128967.1;Rpl17	3
tr|M0RA26|M0RA26_RAT;sp|Q71TY3|RS27_RAT;sp|P24051|RS27L_RAT	ENSRNOG00000016961;ENSRNOG00000021159;ENSRNOG00000050473	LOC100362987;Rps27;Rps27l	3
tr|F1LM19|F1LM19_RAT;sp|P24090|FETUA_RAT;tr|Q7TP75|Q7TP75_RAT	ENSRNOG00000038370	AABR07034632.1;Ahsg	2
tr|A0A0G2JSL0|A0A0G2JSL0_RAT;sp|P28073|PSB6_RAT	ENSRNOG00000011827;ENSRNOG00000019551	LOC100360846;Psmb6	2
sp|P29418|ATP5E_RAT;tr|M0R601|M0R601_RAT	ENSRNOG00000045749;ENSRNOG00000049912	AC105515.1;Atp5f1e	2
sp|P30904|MIF_RAT;tr|D3ZE63|D3ZE63_RAT		AC127887.1;Mif	2
sp|P35435|ATPG_RAT;tr|Q6PCU0|Q6PCU0_RAT;tr|Q6QI09|Q6QI09_RAT	ENSRNOG00000019223	Atp5f1c;Taf3	2
sp|P39069|KAD1_RAT;tr|A0A0G2K7Q6|A0A0G2K7Q6_RAT;tr|M0RC66|M0RC66_RAT	ENSRNOG00000049056	AABR07051450.1;Ak1	2
sp|P40112|PSB3_RAT;tr|D3Z8J0|D3Z8J0_RAT	ENSRNOG00000038259;ENSRNOG00000052730	AABR07053749.1;Psmb3	2
tr|D3ZRM9|D3ZRM9_RAT;sp|P41123|RL13_RAT;tr|A0A0G2JYG9|A0A0G2JYG9_RAT;tr|F1M2E9|F1M2E9_RAT;tr|D3ZD02|D3ZD02_RAT	ENSRNOG00000015335;ENSRNOG00000029227;ENSRNOG00000059545	AABR07054469.1;AC114446.1;Rpl13	3
tr|M0R3X6|M0R3X6_RAT;tr|A0A0G2JSV2|A0A0G2JSV2_RAT;sp|P47727|CBR1_RAT;tr|A0A0G2K658|A0A0G2K658_RAT;tr|A0A096MJ24|A0A096MJ24_RAT	ENSRNOG00000049693;ENSRNOG00000049911	Cbr1;LOC102556347	2
sp|P48500|TPIS_RAT;tr|A0A0G2JWJ4|A0A0G2JWJ4_RAT;tr|A0A0G2JWU1|A0A0G2JWU1_RAT	ENSRNOG00000015290;ENSRNOG00000055222	AC094212.1;Tpi1	2
tr|A0A0U1RRS7|A0A0U1RRS7_RAT;sp|P49187-2|MK10_RAT;tr|A0A0U1RVI2|A0A0U1RVI2_RAT;sp|P49187|MK10_RAT;sp|P49185|MK08_RAT;tr|F1LP66|F1LP66_RAT	ENSRNOG00000002079;ENSRNOG00000020155	Mapk10;Mapk8	2
sp|P51583|PUR6_RAT;tr|F8WFR8|F8WFR8_RAT;tr|A0A0G2K5S4|A0A0G2K5S4_RAT	ENSRNOG00000002101;ENSRNOG00000056398	AABR07036855.1;Paics	2
sp|P60522|GBRL2_RAT;tr|F1M1J6|F1M1J6_RAT;tr|A0A0G2JU55|A0A0G2JU55_RAT	ENSRNOG00000019425;ENSRNOG00000027547;ENSRNOG00000033345	AABR07048308.1;AABR07072668.1;Gabarapl2;LOC100359937	4
sp|P60892|PRPS1_RAT;tr|A0A0G2JSV3|A0A0G2JSV3_RAT;sp|P09330|PRPS2_RAT;tr|M0RBK1|M0RBK1_RAT	ENSRNOG00000004160;ENSRNOG00000032513;ENSRNOG00000056011;ENSRNOG00000060262	LOC314140;Prps1;Prps1l1;Prps2	4
tr|F1M5C9|F1M5C9_RAT;tr|A0A0G2JV72|A0A0G2JV72_RAT;tr|A0A0G2K739|A0A0G2K739_RAT;sp|P62839|UB2D2_RAT;sp|P61078|UB2D3_RAT	ENSRNOG00000013741;ENSRNOG00000042523	Ube2d2;Ube2d3	2
tr|A0A0G2JV81|A0A0G2JV81_RAT;sp|P84079|ARF1_RAT;sp|P61206|ARF3_RAT;tr|A0A0G2K9H8|A0A0G2K9H8_RAT;tr|A0A0G2K4Q4|A0A0G2K4Q4_RAT;sp|P84082|ARF2_RAT	ENSRNOG00000004807;ENSRNOG00000054775;ENSRNOG00000057515;ENSRNOG00000060229	AABR07046136.1;Arf1;Arf2;Arf3;Fkbp11	5
sp|P61227|RAP2B_RAT;tr|D3ZK56|D3ZK56_RAT	ENSRNOG00000002529;ENSRNOG00000014420	Rap2b;Rap2c	2
tr|M0R7P0|M0R7P0_RAT;sp|P61354|RL27_RAT;tr|D3ZTK5|D3ZTK5_RAT	ENSRNOG00000020674;ENSRNOG00000033603;ENSRNOG00000053282;ENSRNOG00000060888	AABR07034315.1;AABR07070594.1;AABR07070689.2;Rpl27	4
sp|P61589|RHOA_RAT;tr|B2RYP0|B2RYP0_RAT;tr|A0A0G2K6E0|A0A0G2K6E0_RAT	ENSRNOG00000012630;ENSRNOG00000050519	Rhoa;Rhoc	2
sp|P62083|RS7_RAT	ENSRNOG00000008551;ENSRNOG00000027694	LOC100362830;Rps7	2
sp|P62243|RS8_RAT;tr|M0R7Q5|M0R7Q5_RAT;tr|D3ZIE1|D3ZIE1_RAT;tr|Q6TXJ0|Q6TXJ0_RAT	ENSRNOG00000007238;ENSRNOG00000054626	LOC297756;Rps8	2
tr|D3ZLL8|D3ZLL8_RAT;tr|A0A0G2JYA6|A0A0G2JYA6_RAT;sp|P62246|RS15A_RAT;tr|A0A0G2K6I0|A0A0G2K6I0_RAT;tr|A0A0G2K2F6|A0A0G2K2F6_RAT;tr|D3ZS61|D3ZS61_RAT	ENSRNOG00000018320;ENSRNOG00000030447;ENSRNOG00000042940;ENSRNOG00000055046	AABR07043101.1;AC105662.1;AC135389.1;Rps15a	4
tr|A0A0H2UHT6|A0A0H2UHT6_RAT;tr|D3ZM33|D3ZM33_RAT;sp|P62271|RS18_RAT;tr|M0R5K9|M0R5K9_RAT;tr|A0A0G2KA79|A0A0G2KA79_RAT	ENSRNOG00000014169;ENSRNOG00000028505;ENSRNOG00000030107;ENSRNOG00000032944;ENSRNOG00000033152	AABR07049320.1;AABR07049329.1;AABR07057460.1;Rps18;Rps18l1	5
sp|P62278|RS13_RAT;tr|M0RCY2|M0RCY2_RAT	ENSRNOG00000028021;ENSRNOG00000048698	AABR07048031.1;LOC684988;Rps13	3
tr|F1M013|F1M013_RAT;tr|D3ZU22|D3ZU22_RAT;sp|P62425|RL7A_RAT;tr|D3ZPL5|D3ZPL5_RAT;tr|M0R3M3|M0R3M3_RAT;tr|D4A6B9|D4A6B9_RAT;tr|F1M4C7|F1M4C7_RAT;tr|D3ZJH5|D3ZJH5_RAT	ENSRNOG00000028826;ENSRNOG00000029130;ENSRNOG00000029423;ENSRNOG00000031902;ENSRNOG00000033843;ENSRNOG00000047737;ENSRNOG00000049097	AABR07007121.1;AABR07027819.1;AABR07052519.1;AABR07057586.1;AC128901.1;Rpl7a	6
sp|P62630|EF1A1_RAT;tr|M0R757|M0R757_RAT;tr|F1M6C2|F1M6C2_RAT	ENSRNOG00000009439;ENSRNOG00000029996	AABR07054368.1;Eef1a1	2
sp|P62718|RL18A_RAT;tr|F1M0K6|F1M0K6_RAT	ENSRNOG00000018795;ENSRNOG00000042547	AABR07001902.1;Rpl18a	2
tr|F1LT35|F1LT35_RAT;tr|D3ZTH8|D3ZTH8_RAT;sp|P62752|RL23A_RAT;tr|D3ZNM1|D3ZNM1_RAT;tr|D4AAL7|D4AAL7_RAT;tr|D3ZFK7|D3ZFK7_RAT	ENSRNOG00000023344;ENSRNOG00000028963;ENSRNOG00000029859;ENSRNOG00000032771	AABR07015476.1;AABR07021384.1;AABR07064811.1;Rpl23a	4
sp|P62804|H4_RAT		Hist1h2ao;Hist1h4b;Hist1h4m;Hist2h4	4
sp|P62813|GBRA1_RAT;tr|F1LMU7|F1LMU7_RAT;sp|P23576|GBRA2_RAT;tr|F1LNE8|F1LNE8_RAT;sp|P20236|GBRA3_RAT	ENSRNOG00000002349;ENSRNOG00000003512;ENSRNOG00000056558	Gabra1;Gabra2;Gabra3	3
sp|P62828|RAN_RAT;sp|Q8K586|RANT_RAT;tr|Q66H11|Q66H11_RAT	ENSRNOG00000000938;ENSRNOG00000031013;ENSRNOG00000032913	Ran;Rasl2-9;RGD1306195	3
tr|F1M6F4|F1M6F4_RAT;tr|A0A0H2UHU0|A0A0H2UHU0_RAT;sp|P62853|RS25_RAT;tr|D4AE10|D4AE10_RAT;tr|M0R763|M0R763_RAT	ENSRNOG00000027503;ENSRNOG00000029737;ENSRNOG00000031703;ENSRNOG00000047151;ENSRNOG00000055406	AABR07050701.1;AABR07061383.1;AABR07063959.1;AABR07071294.1;AABR07073045.1;Rps25	6
sp|P62859|RS28_RAT;tr|A0A0A0MY14|A0A0A0MY14_RAT	ENSRNOG00000042886;ENSRNOG00000046342	LOC100359503;Rps28	2
tr|A0A140TA99|A0A140TA99_RAT;sp|P62870|ELOB_RAT;tr|F1M937|F1M937_RAT;tr|F1LZ51|F1LZ51_RAT	ENSRNOG00000004814;ENSRNOG00000007803;ENSRNOG00000033199	AABR07068955.1;AC132539.1;Elob	3
sp|P62890|RL30_RAT;tr|A0A0G2K5E6|A0A0G2K5E6_RAT	ENSRNOG00000005975;ENSRNOG00000021406;ENSRNOG00000032825	LOC100362027;LOC108351936;Rpl30	3
tr|D4A5L9|D4A5L9_RAT;sp|P62898|CYC_RAT	ENSRNOG00000010452;ENSRNOG00000032885;ENSRNOG00000033559	AC128290.1;Cycs;LOC100363502	3
sp|P62909|RS3_RAT;tr|D3ZVH2|D3ZVH2_RAT	ENSRNOG00000007605;ENSRNOG00000017418	AABR07052430.1;Rps3	2
tr|D4A6W6|D4A6W6_RAT;sp|P62919|RL8_RAT		AC129049.1;LOC100360117;Rpl8	3
sp|P62959|HINT1_RAT;tr|D4A269|D4A269_RAT	ENSRNOG00000000622;ENSRNOG00000005630	AABR07060778.1;Hint1	2
sp|P63018|HSP7C_RAT;tr|M0RCB1|M0RCB1_RAT;tr|D4A4S3|D4A4S3_RAT;tr|F1LZI1|F1LZI1_RAT;tr|M0R8M9|M0R8M9_RAT;tr|A0A0G2JVI3|A0A0G2JVI3_RAT	ENSRNOG00000032585;ENSRNOG00000034066;ENSRNOG00000034093;ENSRNOG00000061099	AABR07011951.1;AABR07033324.1;AABR07048992.1;Hspa8	4
sp|P63045|VAMP2_RAT;sp|P63025|VAMP3_RAT	ENSRNOG00000006989;ENSRNOG00000030055	Vamp2;Vamp3	2
tr|A0A0H2UHV6|A0A0H2UHV6_RAT;sp|P63100|CANB1_RAT;sp|P63100-2|CANB1_RAT;tr|A0A0G2K4H3|A0A0G2K4H3_RAT	ENSRNOG00000043210;ENSRNOG00000057321	AABR07016428.1;Ppp3r1	2
tr|D3ZCR3|D3ZCR3_RAT;tr|A0A0G2K6P4|A0A0G2K6P4_RAT;sp|P63159|HMGB1_RAT;tr|D3ZXR5|D3ZXR5_RAT	ENSRNOG00000034130;ENSRNOG00000051482;ENSRNOG00000058908	Hmg1l1;Hmgb1;LOC108349189	3
sp|P63170|DYL1_RAT;tr|A0A0G2JU43|A0A0G2JU43_RAT	ENSRNOG00000011222;ENSRNOG00000052174	Dynll1;LOC100361920	2
tr|D4AD70|D4AD70_RAT;sp|P63174|RL38_RAT;tr|D3ZW57|D3ZW57_RAT;tr|D4A862|D4A862_RAT;tr|D3ZZH2|D3ZZH2_RAT	ENSRNOG00000030747;ENSRNOG00000031434;ENSRNOG00000032847;ENSRNOG00000033484;ENSRNOG00000033808;ENSRNOG00000048701	AABR07032520.2;AABR07039377.1;AABR07060145.1;AC098064.1;LOC685963;LOC690468;Rpl38	7
sp|P63259|ACTG_RAT	ENSRNOG00000036701;ENSRNOG00000053452	Actg1;LOC100361457	2
sp|P63322|RALA_RAT;sp|P36860|RALB_RAT	ENSRNOG00000002440;ENSRNOG00000013454	Rala;Ralb	2
tr|A0A0H2UI18|A0A0H2UI18_RAT;tr|F1LT36|F1LT36_RAT;sp|P63326|RS10_RAT;tr|D3ZJY5|D3ZJY5_RAT		AABR07017250.1;Rps10;Rps10l1	3
tr|A0A0G2JYA4|A0A0G2JYA4_RAT;sp|P63331|PP2AA_RAT;sp|P62716|PP2AB_RAT	ENSRNOG00000005389;ENSRNOG00000015182	Ppp2ca;Ppp2cb	2
sp|P68136|ACTS_RAT;sp|P68035|ACTC_RAT;tr|A0A0G2K4M6|A0A0G2K4M6_RAT;sp|P63269|ACTH_RAT;sp|P62738|ACTA_RAT	ENSRNOG00000008536;ENSRNOG00000017786;ENSRNOG00000029401;ENSRNOG00000058039	Acta1;Acta2;Actc1;Actg2	4
sp|P68370|TBA1A_RAT;sp|Q68FR8|TBA3_RAT	ENSRNOG00000031707;ENSRNOG00000032967;ENSRNOG00000060728	Tuba1a;Tuba3a;Tuba3b	3
sp|P83941|ELOC_RAT;tr|A0A0G2K2A0|A0A0G2K2A0_RAT;tr|A0A096MIY6|A0A096MIY6_RAT	ENSRNOG00000031730;ENSRNOG00000051063;ENSRNOG00000061371	AABR07035541.3;AABR07044940.1;Eloc	3
sp|P85968|6PGD_RAT;tr|A0A0G2K7Q8|A0A0G2K7Q8_RAT	ENSRNOG00000057626	Kif1b;Pgd	2
sp|Q00715|H2B1_RAT;tr|M0R4L7|M0R4L7_RAT;tr|G3V9C7|G3V9C7_RAT;tr|G3V8B3|G3V8B3_RAT;tr|D3ZWM5|D3ZWM5_RAT;tr|D3ZLY9|D3ZLY9_RAT;tr|A0A0G2JXE0|A0A0G2JXE0_RAT;tr|D3ZNH4|D3ZNH4_RAT;tr|A0A0G2JXI9|A0A0G2JXI9_RAT;tr|A0A0G2K7R1|A0A0G2K7R1_RAT;tr|M0RBQ5|M0RBQ5_RAT;tr|D4A817|D4A817_RAT;tr|D3ZNZ9|D3ZNZ9_RAT	ENSRNOG00000021198;ENSRNOG00000031790;ENSRNOG00000043419;ENSRNOG00000045753;ENSRNOG00000047776;ENSRNOG00000053845;ENSRNOG00000054296;ENSRNOG00000055512;ENSRNOG00000058187;ENSRNOG00000058263;ENSRNOG00000059093;ENSRNOG00000059382;ENSRNOG00000059949;ENSRNOG00000060769	AABR07012583.2;H2bc12;H2bc9;H2bu1;Hist1h2bc;Hist1h2bd;Hist1h2bg;Hist1h2bl;Hist1h2bo;Hist1h2bq;Hist2h2be;Hist3h2ba;LOC100364835;LOC100365043;LOC100910200;LOC102549061;LOC684797	17
tr|M0R8A4|M0R8A4_RAT;sp|Q3B8Q0|MARE2_RAT;tr|M0R7M8|M0R7M8_RAT;tr|A0A096MJL2|A0A096MJL2_RAT	ENSRNOG00000047261;ENSRNOG00000049681	AABR07031445.1;AABR07031491.2;Mapre2	3
sp|Q3T1J1|IF5A1_RAT;tr|G3V7J7|G3V7J7_RAT	ENSRNOG00000011859;ENSRNOG00000016478	Eif5a;Eif5a2	2
sp|Q4QQV3|F162A_RAT;tr|A0A0G2JWV2|A0A0G2JWV2_RAT;tr|D3ZM02|D3ZM02_RAT;tr|D4ADP1|D4ADP1_RAT	ENSRNOG00000002255;ENSRNOG00000005821	AC130253.1;Fam162a	2
tr|A0A1W2Q6F8|A0A1W2Q6F8_RAT;sp|Q561S0|NDUAA_RAT	ENSRNOG00000016470;ENSRNOG00000062245	Ndufa10;Ndufa10l1	2
sp|Q5HZV9|PP1R7_RAT;tr|R9PXV7|R9PXV7_RAT	ENSRNOG00000016974	AABR07068351.1;Ppp1r7	2
sp|Q62844|FYN_RAT;tr|A0A0G2K2E3|A0A0G2K2E3_RAT;tr|A0A096MKC1|A0A096MKC1_RAT;tr|Q6AXQ3|Q6AXQ3_RAT;tr|A0A0G2K2V7|A0A0G2K2V7_RAT	ENSRNOG00000000596;ENSRNOG00000037227	Fyn;Yes1	2
tr|A0A0G2KAT4|A0A0G2KAT4_RAT;sp|Q63413|DX39B_RAT;sp|Q5U216|DX39A_RAT	ENSRNOG00000000841;ENSRNOG00000004373	Ddx39a;Ddx39b	2
tr|F1LPK7|F1LPK7_RAT;sp|Q63598|PLST_RAT;tr|A0A0G2QC04|A0A0G2QC04_RAT	ENSRNOG00000009945;ENSRNOG00000027520	Pls1;Pls3	2
tr|A0A0G2K3Z9|A0A0G2K3Z9_RAT;sp|Q63716|PRDX1_RAT	ENSRNOG00000017194;ENSRNOG00000017695	AABR07012795.1;Prdx1	2
sp|Q63945-2|SET_RAT;tr|A0A0G2JSU3|A0A0G2JSU3_RAT;sp|Q63945|SET_RAT;tr|D3ZC07|D3ZC07_RAT;tr|A0A0G2K5L9|A0A0G2K5L9_RAT	ENSRNOG00000034241;ENSRNOG00000052952	AABR07031963.1;Set	2
sp|Q66H61|SYQ_RAT;tr|M0RDR7|M0RDR7_RAT	ENSRNOG00000060912	LOC100911132;Qars1	2
tr|D4A1P2|D4A1P2_RAT;sp|Q6PDV7|RL10_RAT	ENSRNOG00000032720;ENSRNOG00000056765	Rpl10;Rpl10l	2
sp|Q6PEC0|AP4A_RAT;tr|D3ZH27|D3ZH27_RAT	ENSRNOG00000013110	LOC100910067;Nudt2	2
sp|Q6RUV5|RAC1_RAT;tr|A0A0G2K0X4|A0A0G2K0X4_RAT;tr|Q5U1Y2|Q5U1Y2_RAT	ENSRNOG00000001068;ENSRNOG00000007350	Rac1;Rac2	2
sp|Q6URK4-2|ROA3_RAT;sp|Q6URK4|ROA3_RAT;tr|E9PSU5|E9PSU5_RAT;tr|D4A6A2|D4A6A2_RAT	ENSRNOG00000038905;ENSRNOG00000052968	AABR07048397.1;Hnrnpa3	2
sp|Q712U5-2|ARP19_RAT;sp|Q712U5|ARP19_RAT;sp|P60841-2|ENSA_RAT;sp|P60841|ENSA_RAT	ENSRNOG00000023086;ENSRNOG00000048617	Arpp19;Ensa;LOC100360828	3
sp|Q7M0E3|DEST_RAT;tr|D4A315|D4A315_RAT	ENSRNOG00000005924;ENSRNOG00000026891	AC093995.1;Dstn	2
tr|A0A0G2K613|A0A0G2K613_RAT;sp|Q9EPH2|MRP_RAT	ENSRNOG00000009113;ENSRNOG00000054614	AABR07002779.1;Marcksl1	2
sp|Q9JHU0|DPYL5_RAT;tr|A0A0G2K8Y5|A0A0G2K8Y5_RAT	ENSRNOG00000008996	Dpysl5;LOC103692570	2
sp|Q9JJW3|ATPMK_RAT	ENSRNOG00000020296;ENSRNOG00000042869	Atp5mk;LOC103693430	2
tr|A0A0G2JZ76|A0A0G2JZ76_RAT;sp|Q9JKC9-3|SYNRG_RAT;sp|Q9JKC9-2|SYNRG_RAT;sp|Q9JKC9-4|SYNRG_RAT;sp|Q9JKC9|SYNRG_RAT	ENSRNOG00000053814	AC105531.1;Synrg	2
tr|G3V8C4|G3V8C4_RAT;sp|Q9Z0W7|CLIC4_RAT;tr|F1M9X4|F1M9X4_RAT;sp|Q811Q2|CLIC6_RAT;tr|A0A0G2JTB6|A0A0G2JTB6_RAT	ENSRNOG00000018109;ENSRNOG00000026870	Clic4;Clic6	2
tr|A0A096MJ96|A0A096MJ96_RAT;tr|D4A4D8|D4A4D8_RAT;tr|A0A096MIZ1|A0A096MIZ1_RAT	ENSRNOG00000025558;ENSRNOG00000051069	AC134204.1;Palm2	2
tr|A0A096MJE3|A0A096MJE3_RAT;tr|Q6AYD5|Q6AYD5_RAT	ENSRNOG00000046271;ENSRNOG00000048817	Gspt1;Gspt2	2
tr|A0A0G2JTW9|A0A0G2JTW9_RAT	ENSRNOG00000047098;ENSRNOG00000061299	Hbb-b1;Hbb-bs;LOC100134871	3
tr|A0A0G2JY69|A0A0G2JY69_RAT;tr|G3V907|G3V907_RAT;sp|Q9QYU1|PEX19_RAT		LOC102548286;Pex19	2
tr|B5DEL8|B5DEL8_RAT;tr|A0A0G2JZJ9|A0A0G2JZJ9_RAT	ENSRNOG00000026646;ENSRNOG00000029339;ENSRNOG00000052764	AABR07016779.1;LOC100363268;Ndufs5	3
tr|A0A0G2JZS1|A0A0G2JZS1_RAT;tr|F1LT58|F1LT58_RAT;tr|A0A0H2UHW5|A0A0H2UHW5_RAT;sp|Q56R16|IMA6_RAT;tr|Q56R20|Q56R20_RAT;sp|P83953|IMA5_RAT	ENSRNOG00000030109;ENSRNOG00000051711	Kpna1;Kpna5	2
tr|A0A0G2K0W9|A0A0G2K0W9_RAT;sp|P48004-2|PSA7_RAT;tr|F1M6I7|F1M6I7_RAT;sp|P48004|PSA7_RAT	ENSRNOG00000030363;ENSRNOG00000056853	Psma7;Psma8	2
tr|D4A3I4|D4A3I4_RAT;tr|A0A0G2K4W2|A0A0G2K4W2_RAT	ENSRNOG00000008512;ENSRNOG00000024829	AABR07014804.1;Btf3l4	2
tr|D3ZN21|D3ZN21_RAT;tr|A0A0G2K719|A0A0G2K719_RAT	ENSRNOG00000002501;ENSRNOG00000023383	Ddx3x;Ddx3y	2
tr|F1M706|F1M706_RAT;tr|A0A140TAI6|A0A140TAI6_RAT;tr|D3ZZ95|D3ZZ95_RAT;tr|M0RCN1|M0RCN1_RAT;tr|D4A1Q0|D4A1Q0_RAT;sp|P39032|RL36_RAT	ENSRNOG00000002340;ENSRNOG00000029560;ENSRNOG00000029988;ENSRNOG00000031947;ENSRNOG00000033473	AABR07007675.1;AABR07071986.1;AABR07072272.1;LOC100361079;Rpl36	5
tr|B2GUV5|B2GUV5_RAT;tr|A0A0G2KAG3|A0A0G2KAG3_RAT	ENSRNOG00000000840;ENSRNOG00000008163	Atp6v1g1;Atp6v1g2	2
tr|B5DFB2|B5DFB2_RAT;tr|D4A250|D4A250_RAT;sp|Q71UF4|RBBP7_RAT	ENSRNOG00000005157;ENSRNOG00000021492	Rbbp4;Rbbp7	2
tr|D3ZCV0|D3ZCV0_RAT;tr|Q8R4I6|Q8R4I6_RAT	ENSRNOG00000017833;ENSRNOG00000019745	Actn2;Actn3	2
tr|D3ZCZ9|D3ZCZ9_RAT;sp|P52504|NDUS6_RAT		LOC679739;Ndufs6	2
tr|F1LZC5|F1LZC5_RAT;tr|D3ZE15|D3ZE15_RAT	ENSRNOG00000020602;ENSRNOG00000021688	AABR07056686.1;Ndufa13	2
tr|D3ZFY8|D3ZFY8_RAT;tr|F1M227|F1M227_RAT	ENSRNOG00000022456;ENSRNOG00000025580	AABR07067339.1;LOC679539;Ube2v1	3
tr|D4AD15|D4AD15_RAT;tr|D3ZU13|D3ZU13_RAT;tr|M0RD03|M0RD03_RAT;tr|D4A554|D4A554_RAT;tr|A0A0G2JY73|A0A0G2JY73_RAT	ENSRNOG00000001738;ENSRNOG00000014368	Eif4g1;Eif4g3	2
tr|M0RA24|M0RA24_RAT;tr|D4A4P3|D4A4P3_RAT	ENSRNOG00000011825;ENSRNOG00000048888	AABR07060996.1;Ndufb3	2
tr|F1LN69|F1LN69_RAT;tr|A0A0G2K382|A0A0G2K382_RAT;sp|F1LP90|MINK1_RAT;tr|A0A0G2JV77|A0A0G2JV77_RAT;tr|F1M754|F1M754_RAT;tr|A0A0G2K7W4|A0A0G2K7W4_RAT	ENSRNOG00000014013;ENSRNOG00000033508	Map4k4;Mink1	2
tr|F1LW77|F1LW77_RAT;tr|D3ZCU8|D3ZCU8_RAT	ENSRNOG00000006698;ENSRNOG00000013035	Rab33a;Rab33b	2
tr|F7EPH4|F7EPH4_RAT;tr|A0A0G2JUD2|A0A0G2JUD2_RAT	ENSRNOG00000000557	Ppa1;Sar1a	2
tr|G3V6Z5|G3V6Z5_RAT;tr|G3V8Y9|G3V8Y9_RAT;sp|P19492-2|GRIA3_RAT;sp|P19492|GRIA3_RAT;tr|A0A0G2JU28|A0A0G2JU28_RAT;sp|P19493-2|GRIA4_RAT	ENSRNOG00000006957;ENSRNOG00000007682	Gria3;Gria4	2
tr|Q5BJU0|Q5BJU0_RAT;tr|A0A0G2K508|A0A0G2K508_RAT;sp|D3Z8L7|RRAS_RAT	ENSRNOG00000012258;ENSRNOG00000037247	Rras;Rras2	2
tr|Q68FX3|Q68FX3_RAT;tr|A0A0G2K7X6|A0A0G2K7X6_RAT;tr|A0A0G2JY21|A0A0G2JY21_RAT;tr|A0A0G2JUH2|A0A0G2JUH2_RAT;tr|Q68G14|Q68G14_RAT;tr|A0A0G2JZQ1|A0A0G2JZQ1_RAT	ENSRNOG00000018033	Ddx19a;Ddx19b	2
tr|Q6AY18|Q6AY18_RAT;sp|Q5HZY2|SAR1B_RAT	ENSRNOG00000004820	Sar1a;Sar1b	2
tr|Q6PDW1|Q6PDW1_RAT;tr|D3ZHB3|D3ZHB3_RAT;sp|P63324|RS12_RAT	ENSRNOG00000016411;ENSRNOG00000020093	LOC100360573;Rps12	2
tr|Q925D6|Q925D6_RAT;tr|B1H230|B1H230_RAT		Map2k3;Map2k6	2
sp|M0RC99|RAB5A_RAT	ENSRNOG00000057056	Rab5a;Rab5al1	2
sp|O08590|AOC3_RAT;tr|A0A0G2JWZ2|A0A0G2JWZ2_RAT	ENSRNOG00000051307;ENSRNOG00000053448	AC123346.1;Aoc3	2
tr|Q5XIW0|Q5XIW0_RAT;sp|O35093|TIM23_RAT	ENSRNOG00000019811	LOC100362432;Timm23	2
sp|O35142|COPB2_RAT;tr|A0A0G2K0P9|A0A0G2K0P9_RAT	ENSRNOG00000060723	AABR07071244.1;Copb2	2
sp|O35509|RB11B_RAT;tr|A0A0G2JZR4|A0A0G2JZR4_RAT;sp|P62494|RB11A_RAT	ENSRNOG00000007648;ENSRNOG00000011302	Rab11a;Rab11b	2
tr|Q66WT9|Q66WT9_RAT;sp|O55012-2|PICAL_RAT;tr|Q66SY1|Q66SY1_RAT;tr|A0A0G2JUQ5|A0A0G2JUQ5_RAT;sp|O55012|PICAL_RAT;tr|Q498N4|Q498N4_RAT;tr|A0A0G2JTT2|A0A0G2JTT2_RAT;sp|Q05140-2|AP180_RAT;tr|A0A0G2K0B6|A0A0G2K0B6_RAT;sp|Q05140|AP180_RAT;tr|F1LRK0|F1LRK0_RAT	ENSRNOG00000018322;ENSRNOG00000023861	Picalm;Snap91	2
sp|P01946|HBA_RAT	ENSRNOG00000029886;ENSRNOG00000047321	Hba-a1;Hba-a2	2
tr|D4ACV3|D4ACV3_RAT;sp|P0CC09|H2A2A_RAT;sp|P02262|H2A1_RAT;tr|M0RDM4|M0RDM4_RAT;sp|A9UMV8|H2AJ_RAT;tr|Q6I8Q6|Q6I8Q6_RAT;tr|M0RCL5|M0RCL5_RAT;tr|G3V9C0|G3V9C0_RAT;tr|D3ZVK7|D3ZVK7_RAT;sp|Q64598|H2A1F_RAT;sp|Q4FZT6|H2A3_RAT;sp|Q00728|H2A4_RAT;sp|P0C170|H2A1E_RAT;sp|P0C169|H2A1C_RAT		H2ac1;H2ac4;H2aj;Hist1h2ac;Hist1h2af;Hist1h2ah;Hist1h2ai;hist1h2ail2;Hist1h2an;Hist2h2aa2;Hist2h2aa3;Hist3h2a;LOC100910554;LOC103690190;LOC684773	15
tr|A0A0H2UHQ8|A0A0H2UHQ8_RAT;tr|D3ZFA8|D3ZFA8_RAT;sp|P04644|RS17_RAT;tr|D3ZKG6|D3ZKG6_RAT;tr|D3ZHU9|D3ZHU9_RAT	ENSRNOG00000019106;ENSRNOG00000032765;ENSRNOG00000045885;ENSRNOG00000048927	AABR07018533.1;AABR07068536.1;LOC100365810;Rps17	4
tr|M0R5J4|M0R5J4_RAT;sp|P04764|ENOA_RAT	ENSRNOG00000017895;ENSRNOG00000028543	AABR07052523.1;Eno1	2
sp|P04797|G3P_RAT;tr|M0R590|M0R590_RAT;tr|D3ZGY4|D3ZGY4_RAT;tr|M0R660|M0R660_RAT	ENSRNOG00000018630;ENSRNOG00000033057;ENSRNOG00000050630	AABR07025010.1;AABR07070043.1;Gapdh;LOC108351137	4
sp|P05065|ALDOA_RAT;tr|Q6AY07|Q6AY07_RAT	ENSRNOG00000030869;ENSRNOG00000052802	Aldoa;Aldoart2	2
tr|A0A0G2JXC3|A0A0G2JXC3_RAT;sp|P05765|RS21_RAT;tr|D3ZSE0|D3ZSE0_RAT	ENSRNOG00000033916;ENSRNOG00000060449	AC141489.1;Rps21	2
sp|P06302|PTMA_RAT	ENSRNOG00000018584;ENSRNOG00000025731	LOC100359583;Ptma	2
sp|P07871|THIKB_RAT;sp|P21775|THIKA_RAT;sp|P21775-2|THIKA_RAT;tr|F1LPD6|F1LPD6_RAT	ENSRNOG00000032908	Acaa1a;Acaa1b	2
sp|P09895|RL5_RAT;tr|D3ZHP8|D3ZHP8_RAT	ENSRNOG00000023529;ENSRNOG00000037220	AABR07031089.1;Rpl5	2
tr|A0A0A0MXW3|A0A0A0MXW3_RAT;tr|D4AEC0|D4AEC0_RAT;sp|P0C0S7|H2AZ_RAT	ENSRNOG00000010306;ENSRNOG00000052275	H2az1;H2az2	2
sp|P62986|RL40_RAT;tr|F1LU69|F1LU69_RAT;sp|P62982|RS27A_RAT;sp|P0CG51|UBB_RAT;tr|F1LML2|F1LML2_RAT;sp|Q63429|UBC_RAT	ENSRNOG00000004426;ENSRNOG00000019974;ENSRNOG00000057823	Rps27a;Uba52;Ubc	3
sp|P0DMW1|HS71B_RAT;sp|P0DMW0|HS71A_RAT		Hspa1a;Hspa1b	2
sp|P0DP31|CALM3_RAT;sp|P0DP30|CALM2_RAT;sp|P0DP29|CALM1_RAT;tr|D4ABV5|D4ABV5_RAT	ENSRNOG00000004060;ENSRNOG00000016770;ENSRNOG00000030871	Calm1;Calm2;Calm3	3
sp|P10111|PPIA_RAT;tr|A0A0G2K1P0|A0A0G2K1P0_RAT;tr|A0A0G2K2E4|A0A0G2K2E4_RAT	ENSRNOG00000027864;ENSRNOG00000031045;ENSRNOG00000055068	LOC100911252;Ppia;Ppial4d	3
sp|P11517|HBB2_RAT	ENSRNOG00000047098;ENSRNOG00000061299	Hbb-bs;LOC100134871	2
sp|P12711|ADHX_RAT;tr|Q7TQ90|Q7TQ90_RAT	ENSRNOG00000046357	Adh4;Adh5	2
sp|P13084-2|NPM_RAT;sp|P13084|NPM_RAT;tr|D3ZXI2|D3ZXI2_RAT;tr|D3ZP59|D3ZP59_RAT;tr|F7FKF2|F7FKF2_RAT	ENSRNOG00000004616;ENSRNOG00000018923;ENSRNOG00000032995;ENSRNOG00000039997	AABR07025089.1;AABR07041089.1;AABR07055527.1;Npm1	4
tr|Q6PDV6|Q6PDV6_RAT;sp|P13471|RS14_RAT	ENSRNOG00000018774	LOC100911847;Rps14	2
sp|P15999|ATPA_RAT;tr|F1LP05|F1LP05_RAT;tr|A0A0G2K099|A0A0G2K099_RAT	ENSRNOG00000017032;ENSRNOG00000054846	AABR07022393.1;Atp5f1a	2
tr|D4A6G6|D4A6G6_RAT;sp|P17074|RS19_RAT;tr|F1M8C7|F1M8C7_RAT;tr|A0A0H2UI38|A0A0H2UI38_RAT;tr|D3ZGN8|D3ZGN8_RAT;tr|F1M764|F1M764_RAT;tr|D3ZUD7|D3ZUD7_RAT;tr|F1LYF3|F1LYF3_RAT	ENSRNOG00000005430;ENSRNOG00000013292;ENSRNOG00000032482;ENSRNOG00000037897	AABR07029006.1;AABR07040944.1;AC117101.1;Rps19;Rps19l2	5
tr|A0A0G2JXD0|A0A0G2JXD0_RAT;sp|P17077|RL9_RAT;tr|M0RBD4|M0RBD4_RAT	ENSRNOG00000026716;ENSRNOG00000028449;ENSRNOG00000030476;ENSRNOG00000052909;ENSRNOG00000061320	AABR07036746.1;LOC100360449;LOC100364457;LOC103692829;Rpl9	5
sp|P18422|PSA3_RAT	ENSRNOG00000007851	Psma3;Psma3l	2
tr|A0A0G2K7W6|A0A0G2K7W6_RAT;sp|P18445|RL27A_RAT;tr|D4AAY6|D4AAY6_RAT;tr|D3ZI60|D3ZI60_RAT	ENSRNOG00000014214;ENSRNOG00000031273;ENSRNOG00000031736	AABR07034639.1;LOC108351703;Rpl27a	3
sp|P19939|APOC1_RAT;tr|A0A0G2K9R5|A0A0G2K9R5_RAT;tr|M0R547|M0R547_RAT	ENSRNOG00000018426	Apoc1;LOC100910181	2
sp|P19944|RLA1_RAT	ENSRNOG00000013874	LOC100360522;Rplp1	2
sp|P20171|RASH_RAT;sp|P08644-2|RASK_RAT;sp|Q04970|RASN_RAT;sp|P08644|RASK_RAT	ENSRNOG00000009338;ENSRNOG00000016611;ENSRNOG00000023079	Hras;Kras;Nras	3
tr|Q6PDW2|Q6PDW2_RAT;tr|M0R5R7|M0R5R7_RAT;tr|D4A870|D4A870_RAT;tr|D4A7B4|D4A7B4_RAT;tr|D3ZPN7|D3ZPN7_RAT;tr|D3ZPH0|D3ZPH0_RAT;tr|D3ZMI8|D3ZMI8_RAT;tr|D3Z9G3|D3Z9G3_RAT;sp|P20280|RL21_RAT;tr|M0RCS9|M0RCS9_RAT;tr|F1LY43|F1LY43_RAT;tr|D3ZQ96|D3ZQ96_RAT;tr|D4A4G9|D4A4G9_RAT;tr|D3ZPV5|D3ZPV5_RAT;tr|D3ZPU6|D3ZPU6_RAT;tr|D3ZEK2|D3ZEK2_RAT;tr|F1LWH4|F1LWH4_RAT;tr|D3ZZH9|D3ZZH9_RAT;tr|D3ZRA9|D3ZRA9_RAT;tr…	ENSRNOG00000000957;ENSRNOG00000029410;ENSRNOG00000029824;ENSRNOG00000030999;ENSRNOG00000031560;ENSRNOG00000032803;ENSRNOG00000033115;ENSRNOG00000033487;ENSRNOG00000033855;ENSRNOG00000036588;ENSRNOG00000038458;ENSRNOG00000045620;ENSRNOG00000045767;ENSRNOG00000046349;ENSRNOG00000047664;ENSRNOG00000048518;ENSRNOG00000048656;ENSRNOG00000049248;ENSRNOG00000049848;ENSRNOG00000050165;ENSRNOG00000050799;…	AABR07007853.1;AABR07007905.1;AABR07012775.1;AABR07013302.1;AABR07025299.1;AABR07026240.1;AABR07028558.1;AABR07030162.1;AABR07034641.1;AABR07037412.1;AABR07043626.1;AABR07052953.1;AABR07062466.1;AABR07067829.1;AABR07068760.1;AABR07069587.1;AABR07070238.2;AC121209.1;AC123185.1;Rpl21	20
tr|A0A0G2K7T5|A0A0G2K7T5_RAT;sp|P63329-2|PP2BA_RAT;sp|P63329|PP2BA_RAT;sp|P20651|PP2BB_RAT;tr|E2CWF2|E2CWF2_RAT;tr|E2CWF1|E2CWF1_RAT;tr|Q6AYJ0|Q6AYJ0_RAT;tr|E2CWF0|E2CWF0_RAT	ENSRNOG00000009745;ENSRNOG00000009882;ENSRNOG00000054782	Ppp3ca;Ppp3cb;Ppp3cc	3
tr|F1LQS3|F1LQS3_RAT;sp|P21533|RL6_RAT;tr|A0A0G2KBA1|A0A0G2KBA1_RAT	ENSRNOG00000025936;ENSRNOG00000055942	AC120310.1;Rpl6	2
sp|P23358|RL12_RAT;tr|M0R4B6|M0R4B6_RAT;tr|D3ZJE2|D3ZJE2_RAT;tr|A0A140TAC5|A0A140TAC5_RAT		LOC102555453;Rpl12	2
tr|A0A0G2K531|A0A0G2K531_RAT;sp|P23764|GPX3_RAT;tr|A0A0G2JXN4|A0A0G2JXN4_RAT;tr|D3ZH29|D3ZH29_RAT;sp|Q64625|GPX6_RAT	ENSRNOG00000052564;ENSRNOG00000060749	Gpx3;Gpx6	2
sp|P24049|RL17_RAT;tr|A0A0H2UHQ1|A0A0H2UHQ1_RAT;tr|F1LZX7|F1LZX7_RAT;tr|A0A0G2KB77|A0A0G2KB77_RAT;tr|D3Z9G9|D3Z9G9_RAT	ENSRNOG00000018680;ENSRNOG00000022022;ENSRNOG00000029262	AABR07053166.1;AC128967.1;Rpl17	3
tr|M0RA26|M0RA26_RAT;sp|Q71TY3|RS27_RAT;sp|P24051|RS27L_RAT	ENSRNOG00000016961;ENSRNOG00000021159;ENSRNOG00000050473	LOC100362987;Rps27;Rps27l	3
sp|P24090|FETUA_RAT;tr|F1LM19|F1LM19_RAT;tr|Q7TP75|Q7TP75_RAT	ENSRNOG00000038370	AABR07034632.1;Ahsg	2
tr|E9PT76|E9PT76_RAT;tr|A0A0U1RVI9|A0A0U1RVI9_RAT;sp|P27952|RS2_RAT;tr|D3ZT78|D3ZT78_RAT;tr|D3ZQW7|D3ZQW7_RAT;tr|D3ZIY7|D3ZIY7_RAT;tr|A0A0G2KB28|A0A0G2KB28_RAT	ENSRNOG00000003401;ENSRNOG00000014179;ENSRNOG00000020641;ENSRNOG00000022934;ENSRNOG00000030174;ENSRNOG00000033244;ENSRNOG00000037380	AABR07029195.1;AABR07042903.1;AABR07066818.1;AABR07069969.1;AC115384.1;AC136661.1;Rps2	7
tr|A0A0G2JSL0|A0A0G2JSL0_RAT;sp|P28073|PSB6_RAT	ENSRNOG00000011827;ENSRNOG00000019551	LOC100360846;Psmb6	2
sp|P29314|RS9_RAT;tr|A0A0G2K4C4|A0A0G2K4C4_RAT;tr|D3ZV50|D3ZV50_RAT;tr|M0RB65|M0RB65_RAT	ENSRNOG00000039203;ENSRNOG00000058909	AABR07040892.1;Rps9;Rps9l1	3
sp|P29418|ATP5E_RAT;tr|M0R601|M0R601_RAT	ENSRNOG00000045749;ENSRNOG00000049912	AC105515.1;Atp5f1e	2
sp|P30713|GSTT2_RAT;tr|A0A0G2K3C6|A0A0G2K3C6_RAT	ENSRNOG00000052415	Gstt2;LOC103694879	2
sp|P35171|CX7A2_RAT	ENSRNOG00000042903	Cox7a2;Cox7a2l2	2
sp|P35435|ATPG_RAT;tr|Q6PCU0|Q6PCU0_RAT;tr|Q6QI09|Q6QI09_RAT	ENSRNOG00000019223	Atp5f1c;Taf3	2
tr|D3ZLH9|D3ZLH9_RAT;tr|Q66HM7|Q66HM7_RAT;sp|P38656|LA_RAT	ENSRNOG00000007998;ENSRNOG00000011606	AABR07061825.1;Ssb	2
tr|A0A0A0MY48|A0A0A0MY48_RAT;sp|P39052-4|DYN2_RAT;sp|P39052-3|DYN2_RAT;tr|A0A0A0MY49|A0A0A0MY49_RAT;sp|P39052-2|DYN2_RAT;sp|P39052|DYN2_RAT;sp|Q08877-8|DYN3_RAT;sp|P21575-7|DYN1_RAT;sp|P21575-3|DYN1_RAT;sp|Q08877-9|DYN3_RAT;sp|P21575-6|DYN1_RAT;sp|P21575-2|DYN1_RAT;sp|Q08877-11|DYN3_RAT;sp|P21575-8|DYN1_RAT;sp|P21575-4|DYN1_RAT;sp|Q08877-13|DYN3_RAT;sp|Q08877-2|DYN3_RAT;sp|Q08877-7|DYN3_RAT;sp|Q0…	ENSRNOG00000007649;ENSRNOG00000026490;ENSRNOG00000033835	Dnm1;Dnm2;Dnm3	3
sp|P39069|KAD1_RAT;tr|A0A0G2K7Q6|A0A0G2K7Q6_RAT;tr|M0RC66|M0RC66_RAT	ENSRNOG00000049056	AABR07051450.1;Ak1	2
sp|P40112|PSB3_RAT;tr|D3Z8J0|D3Z8J0_RAT	ENSRNOG00000038259;ENSRNOG00000052730	AABR07053749.1;Psmb3	2
tr|F1M2E9|F1M2E9_RAT;tr|D3ZD02|D3ZD02_RAT;tr|D3ZRM9|D3ZRM9_RAT;sp|P41123|RL13_RAT;tr|A0A0G2JYG9|A0A0G2JYG9_RAT	ENSRNOG00000015335;ENSRNOG00000029227;ENSRNOG00000059545	AABR07054469.1;AC114446.1;Rpl13	3
sp|P47727|CBR1_RAT;tr|M0R3X6|M0R3X6_RAT;tr|A0A0G2JSV2|A0A0G2JSV2_RAT;tr|A0A0G2K658|A0A0G2K658_RAT;tr|A0A096MJ24|A0A096MJ24_RAT	ENSRNOG00000049693;ENSRNOG00000049911	Cbr1;LOC102556347	2
sp|P48500|TPIS_RAT;tr|A0A0G2JWJ4|A0A0G2JWJ4_RAT;tr|A0A0G2JWU1|A0A0G2JWU1_RAT	ENSRNOG00000015290;ENSRNOG00000055222	AC094212.1;Tpi1	2
sp|P50408|VATF_RAT;tr|B2GUW7|B2GUW7_RAT	ENSRNOG00000007392;ENSRNOG00000051860	Atp6v1f;Rnase4	2
sp|P51583|PUR6_RAT;tr|F8WFR8|F8WFR8_RAT;tr|A0A0G2K5S4|A0A0G2K5S4_RAT	ENSRNOG00000002101;ENSRNOG00000056398	AABR07036855.1;Paics	2
tr|A0A0G2JY70|A0A0G2JY70_RAT;tr|A0A0H2UHG7|A0A0H2UHG7_RAT;tr|D3ZZK1|D3ZZK1_RAT;tr|A0A0G2K6L6|A0A0G2K6L6_RAT;sp|P60868|RS20_RAT;tr|M0RB28|M0RB28_RAT;tr|M0R5V6|M0R5V6_RAT;tr|M0R566|M0R566_RAT;tr|A0A0G2K8W1|A0A0G2K8W1_RAT;tr|M0R987|M0R987_RAT	ENSRNOG00000008555;ENSRNOG00000029341;ENSRNOG00000029627;ENSRNOG00000029843;ENSRNOG00000030345;ENSRNOG00000030426;ENSRNOG00000030596;ENSRNOG00000031205;ENSRNOG00000048426;ENSRNOG00000054540;ENSRNOG00000055526;ENSRNOG00000056863;ENSRNOG00000059138;ENSRNOG00000061454	AABR07036375.1;AABR07043775.1;AABR07043776.1;AABR07044509.1;AABR07050116.1;AABR07070957.1;AC121204.2;AC126292.2;AC136584.1;LOC100359951;LOC100362149;LOC100362684;LOC100364116;Rps20	14
tr|A0A0G2JSV3|A0A0G2JSV3_RAT;sp|P60892|PRPS1_RAT;tr|M0RBK1|M0RBK1_RAT	ENSRNOG00000032513;ENSRNOG00000056011;ENSRNOG00000060262	LOC314140;Prps1;Prps1l1	3
tr|F1M5C9|F1M5C9_RAT;tr|A0A0G2JV72|A0A0G2JV72_RAT;tr|A0A0G2K739|A0A0G2K739_RAT;sp|P62839|UB2D2_RAT;sp|P61078|UB2D3_RAT	ENSRNOG00000013741;ENSRNOG00000042523	Ube2d2;Ube2d3	2
tr|M0R7P0|M0R7P0_RAT;sp|P61354|RL27_RAT;tr|D3ZTK5|D3ZTK5_RAT	ENSRNOG00000020674;ENSRNOG00000033603;ENSRNOG00000053282;ENSRNOG00000060888	AABR07034315.1;AABR07070594.1;AABR07070689.2;Rpl27	4
tr|A0A0H2UHU1|A0A0H2UHU1_RAT;sp|P61515|RL37P_RAT;sp|D4AAZ6|RL37A_RAT;tr|D4A7B1|D4A7B1_RAT	ENSRNOG00000028883	AABR07072078.1;Rpl37a	2
tr|F1M2K3|F1M2K3_RAT;sp|P61959|SUMO2_RAT;sp|Q5XIF4|SUMO3_RAT	ENSRNOG00000003670;ENSRNOG00000038489	Sumo2;Sumo3	2
sp|P62083|RS7_RAT	ENSRNOG00000008551;ENSRNOG00000027694	LOC100362830;Rps7	2
sp|P62142|PP1B_RAT;tr|A0A0G2JYS8|A0A0G2JYS8_RAT;sp|P63088|PP1G_RAT;tr|A0A0G2JVK2|A0A0G2JVK2_RAT;sp|P63088-2|PP1G_RAT	ENSRNOG00000001269;ENSRNOG00000004612;ENSRNOG00000018708	Ppp1ca;Ppp1cb;Ppp1cc	3
sp|P62243|RS8_RAT;tr|M0R7Q5|M0R7Q5_RAT;tr|D3ZIE1|D3ZIE1_RAT;tr|Q6TXJ0|Q6TXJ0_RAT	ENSRNOG00000007238;ENSRNOG00000054626	LOC297756;Rps8	2
tr|D3ZLL8|D3ZLL8_RAT;sp|P62246|RS15A_RAT;tr|A0A0G2K6I0|A0A0G2K6I0_RAT;tr|A0A0G2JYA6|A0A0G2JYA6_RAT	ENSRNOG00000018320;ENSRNOG00000042940	AC135389.1;Rps15a	2
sp|P62268|RS23_RAT;tr|D4A9Q3|D4A9Q3_RAT;tr|F1LTW8|F1LTW8_RAT	ENSRNOG00000016580;ENSRNOG00000029461;ENSRNOG00000034052	AABR07071482.2;AABR07072400.1;Rps23	3
tr|M0R5K9|M0R5K9_RAT;tr|A0A0H2UHT6|A0A0H2UHT6_RAT;tr|D3ZM33|D3ZM33_RAT;sp|P62271|RS18_RAT;tr|A0A0G2KA79|A0A0G2KA79_RAT;tr|D3ZAU6|D3ZAU6_RAT	ENSRNOG00000014169;ENSRNOG00000028505;ENSRNOG00000030107;ENSRNOG00000032944;ENSRNOG00000033152;ENSRNOG00000033451	AABR07042892.1;AABR07049320.1;AABR07049329.1;AABR07057460.1;Rps18;Rps18l1	6
sp|P62278|RS13_RAT;tr|M0RCY2|M0RCY2_RAT	ENSRNOG00000028021;ENSRNOG00000048698	AABR07048031.1;LOC684988;Rps13	3
tr|F1M013|F1M013_RAT;sp|P62425|RL7A_RAT;tr|D3ZU22|D3ZU22_RAT;tr|D3ZJH5|D3ZJH5_RAT;tr|D3ZPL5|D3ZPL5_RAT;tr|D4A6B9|D4A6B9_RAT;tr|M0R3M3|M0R3M3_RAT;tr|F1M1M2|F1M1M2_RAT	ENSRNOG00000028826;ENSRNOG00000029423;ENSRNOG00000031532;ENSRNOG00000031902;ENSRNOG00000033843;ENSRNOG00000047737;ENSRNOG00000049097	AABR07007121.1;AABR07018167.1;AABR07027819.1;AABR07052519.1;AC128901.1;Rpl7a	6
tr|M0R757|M0R757_RAT;sp|P62630|EF1A1_RAT;tr|F1M6C2|F1M6C2_RAT	ENSRNOG00000009439;ENSRNOG00000029996	AABR07054368.1;Eef1a1	2
tr|X1WI37|X1WI37_RAT;sp|P62703|RS4X_RAT;tr|A0A0H2UHX3|A0A0H2UHX3_RAT;tr|D3ZX01|D3ZX01_RAT	ENSRNOG00000003201;ENSRNOG00000031041	Rps4x;Rps4y2	2
tr|A0A0G2K4M6|A0A0G2K4M6_RAT;sp|P62738|ACTA_RAT;sp|P63269|ACTH_RAT	ENSRNOG00000029401;ENSRNOG00000058039	Acta2;Actg2	2
tr|F1LT35|F1LT35_RAT;tr|D3ZTH8|D3ZTH8_RAT;sp|P62752|RL23A_RAT;tr|A0A0G2JU90|A0A0G2JU90_RAT	ENSRNOG00000012822;ENSRNOG00000023344	AC123138.1;Rpl23a	2
sp|P62804|H4_RAT		Hist1h2ao;Hist1h4b;Hist1h4m;Hist2h4	4
sp|P62828|RAN_RAT;tr|Q66H11|Q66H11_RAT;sp|Q8K586|RANT_RAT	ENSRNOG00000000938;ENSRNOG00000031013;ENSRNOG00000032913	Ran;Rasl2-9;RGD1306195	3
sp|P62836|RAP1A_RAT;sp|Q62636|RAP1B_RAT	ENSRNOG00000007048;ENSRNOG00000032463	Rap1a;Rap1b	2
tr|F1M6F4|F1M6F4_RAT;tr|A0A0H2UHU0|A0A0H2UHU0_RAT;sp|P62853|RS25_RAT;tr|D4AE10|D4AE10_RAT	ENSRNOG00000027503;ENSRNOG00000029737;ENSRNOG00000031703;ENSRNOG00000055406	AABR07050701.1;AABR07063959.1;AABR07071294.1;Rps25	4
sp|P62856|RS26_RAT;tr|D3Z8D7|D3Z8D7_RAT;tr|A0A0G2K743|A0A0G2K743_RAT	ENSRNOG00000029512	LOC100360508;LOC100361854;Rps26	3
sp|P62859|RS28_RAT;tr|F1M168|F1M168_RAT;tr|A0A0A0MY14|A0A0A0MY14_RAT	ENSRNOG00000030242;ENSRNOG00000042886;ENSRNOG00000046342	AABR07024115.1;LOC100359503;Rps28	3
sp|P62870|ELOB_RAT;tr|A0A140TA99|A0A140TA99_RAT;tr|F1M937|F1M937_RAT;tr|M0R6V0|M0R6V0_RAT	ENSRNOG00000004814;ENSRNOG00000033199;ENSRNOG00000046568	AABR07051791.1;AABR07068955.1;Elob	3
sp|P62890|RL30_RAT;tr|A0A0G2K5E6|A0A0G2K5E6_RAT;tr|M0RD99|M0RD99_RAT	ENSRNOG00000005975;ENSRNOG00000021406;ENSRNOG00000032825;ENSRNOG00000057677	LOC100362027;LOC108351936;Rpl30;Rpl30l1	4
tr|D4A5L9|D4A5L9_RAT;sp|P62898|CYC_RAT	ENSRNOG00000010452;ENSRNOG00000032885;ENSRNOG00000033559	AC128290.1;Cycs;LOC100363502	3
sp|P62909|RS3_RAT;tr|D3ZVH2|D3ZVH2_RAT	ENSRNOG00000007605;ENSRNOG00000017418	AABR07052430.1;Rps3	2
tr|D4A412|D4A412_RAT;sp|P62912|RL32_RAT	ENSRNOG00000008516;ENSRNOG00000010746	AABR07049516.1;Rpl32	2
tr|D4A6W6|D4A6W6_RAT;sp|P62919|RL8_RAT		AC129049.1;LOC100360117;Rpl8	3
sp|P62959|HINT1_RAT;tr|D4A269|D4A269_RAT	ENSRNOG00000000622;ENSRNOG00000005630	AABR07060778.1;Hint1	2
sp|P63018|HSP7C_RAT;tr|M0RCB1|M0RCB1_RAT;tr|D4A4S3|D4A4S3_RAT;tr|F1LZI1|F1LZI1_RAT;tr|M0R8M9|M0R8M9_RAT;tr|A0A0G2JVI3|A0A0G2JVI3_RAT	ENSRNOG00000032585;ENSRNOG00000034066;ENSRNOG00000034093;ENSRNOG00000061099	AABR07011951.1;AABR07033324.1;AABR07048992.1;Hspa8	4
sp|P63025|VAMP3_RAT;sp|P63045|VAMP2_RAT	ENSRNOG00000006989;ENSRNOG00000030055	Vamp2;Vamp3	2
tr|D3ZCR3|D3ZCR3_RAT;tr|A0A0G2K6P4|A0A0G2K6P4_RAT;sp|P63159|HMGB1_RAT;tr|D3ZXR5|D3ZXR5_RAT;tr|D3ZLG3|D3ZLG3_RAT	ENSRNOG00000032550;ENSRNOG00000034130;ENSRNOG00000051482;ENSRNOG00000058908	AABR07025074.1;Hmg1l1;Hmgb1;LOC108349189	4
sp|P63174|RL38_RAT;tr|D4A862|D4A862_RAT;tr|D3ZZH2|D3ZZH2_RAT;tr|D4AD70|D4AD70_RAT	ENSRNOG00000030747;ENSRNOG00000032847;ENSRNOG00000033484;ENSRNOG00000033808;ENSRNOG00000048701	AABR07032520.2;AABR07039377.1;AABR07060145.1;LOC685963;LOC690468;Rpl38	6
sp|P63259|ACTG_RAT	ENSRNOG00000036701;ENSRNOG00000053452	Actg1;LOC100361457	2
tr|F1LT36|F1LT36_RAT;sp|P63326|RS10_RAT;tr|A0A0H2UI18|A0A0H2UI18_RAT;tr|D3ZH53|D3ZH53_RAT;tr|D3ZJY5|D3ZJY5_RAT		AABR07017250.1;AABR07057264.1;Rps10;Rps10l1	4
sp|P63331|PP2AA_RAT;tr|A0A0G2JYA4|A0A0G2JYA4_RAT;sp|P62716|PP2AB_RAT	ENSRNOG00000005389;ENSRNOG00000015182	Ppp2ca;Ppp2cb	2
sp|P68370|TBA1A_RAT;sp|Q68FR8|TBA3_RAT	ENSRNOG00000031707;ENSRNOG00000032967;ENSRNOG00000060728	Tuba1a;Tuba3a;Tuba3b	3
sp|P81795|IF2G_RAT;sp|C9WPN6|IF2H_RAT	ENSRNOG00000060048;ENSRNOG00000060793	Eif2s3;Eif2s3y	2
sp|P83868|TEBP_RAT;tr|Q5PQL9|Q5PQL9_RAT	ENSRNOG00000002642;ENSRNOG00000060486	Ptges3;Ptges3l1	2
sp|P83941|ELOC_RAT;tr|A0A0G2K2A0|A0A0G2K2A0_RAT;tr|A0A096MIY6|A0A096MIY6_RAT	ENSRNOG00000031730;ENSRNOG00000051063;ENSRNOG00000061371	AABR07035541.3;AABR07044940.1;Eloc	3
sp|P84079|ARF1_RAT;tr|A0A0G2JV81|A0A0G2JV81_RAT;sp|P61206|ARF3_RAT;tr|A0A0G2K9H8|A0A0G2K9H8_RAT;tr|A0A0G2K4Q4|A0A0G2K4Q4_RAT;sp|P84082|ARF2_RAT	ENSRNOG00000004807;ENSRNOG00000054775;ENSRNOG00000057515;ENSRNOG00000060229	AABR07046136.1;Arf1;Arf2;Arf3;Fkbp11	5
tr|D3ZK97|D3ZK97_RAT;sp|P84245|H33_RAT;tr|M0RBX6|M0RBX6_RAT;tr|A0A0G2K0N8|A0A0G2K0N8_RAT	ENSRNOG00000003220;ENSRNOG00000006532;ENSRNOG00000032401;ENSRNOG00000045778;ENSRNOG00000053155	AABR07027811.2;AC119603.1;H3f3a;H3f3b;H3f3c	5
sp|P85968|6PGD_RAT;tr|A0A0G2K7Q8|A0A0G2K7Q8_RAT	ENSRNOG00000057626	Kif1b;Pgd	2
sp|Q00715|H2B1_RAT;tr|M0R4L7|M0R4L7_RAT;tr|G3V9C7|G3V9C7_RAT;tr|G3V8B3|G3V8B3_RAT;tr|D3ZWM5|D3ZWM5_RAT;tr|A0A0G2JXE0|A0A0G2JXE0_RAT;tr|D3ZNH4|D3ZNH4_RAT;tr|A0A0G2JXI9|A0A0G2JXI9_RAT;tr|D3ZLY9|D3ZLY9_RAT;tr|A0A0G2K7R1|A0A0G2K7R1_RAT;tr|D4A817|D4A817_RAT;tr|M0RBQ5|M0RBQ5_RAT;tr|D3ZNZ9|D3ZNZ9_RAT;sp|Q00729|H2B1A_RAT	ENSRNOG00000016865;ENSRNOG00000021198;ENSRNOG00000031790;ENSRNOG00000043419;ENSRNOG00000045753;ENSRNOG00000047776;ENSRNOG00000053845;ENSRNOG00000054296;ENSRNOG00000055512;ENSRNOG00000058187;ENSRNOG00000058263;ENSRNOG00000059093;ENSRNOG00000059382;ENSRNOG00000059949;ENSRNOG00000060769	AABR07012583.2;H2bc1;H2bc12;H2bc9;H2bu1;Hist1h2bc;Hist1h2bd;Hist1h2bg;Hist1h2bl;Hist1h2bo;Hist1h2bq;Hist2h2be;Hist3h2ba;LOC100364835;LOC100365043;LOC100910200;LOC102549061;LOC684797	18
sp|Q07969|CD36_RAT;tr|Q6IMX5|Q6IMX5_RAT;tr|A0A0G2JYC5|A0A0G2JYC5_RAT;tr|A0A096MJ39|A0A096MJ39_RAT;tr|A0A096MJJ0|A0A096MJJ0_RAT;tr|F7F5B5|F7F5B5_RAT;tr|D4A8Z2|D4A8Z2_RAT	ENSRNOG00000043176	AABR07059308.1;Cd36	2
tr|M0R8A4|M0R8A4_RAT;sp|Q3B8Q0|MARE2_RAT;tr|M0R7M8|M0R7M8_RAT;tr|A0A096MJC9|A0A096MJC9_RAT;tr|A0A096MJL2|A0A096MJL2_RAT	ENSRNOG00000047261;ENSRNOG00000049681	AABR07031445.1;AABR07031491.2;Mapre2	3
sp|Q561S0|NDUAA_RAT;tr|A0A1W2Q6F8|A0A1W2Q6F8_RAT	ENSRNOG00000016470;ENSRNOG00000062245	Ndufa10;Ndufa10l1	2
sp|Q5EB94|MYZAP_RAT;tr|H8Y6S5|H8Y6S5_RAT	ENSRNOG00000057676	Myzap;Polr2m	2
tr|R9PXV7|R9PXV7_RAT;sp|Q5HZV9|PP1R7_RAT	ENSRNOG00000016974	AABR07068351.1;Ppp1r7	2
sp|Q5I0P2|GCSH_RAT;tr|A0A0G2JZ02|A0A0G2JZ02_RAT	ENSRNOG00000011535;ENSRNOG00000051496	AABR07007134.1;Gcsh	2
sp|Q5XIB3|ARHL1_RAT;tr|Q6TXE7|Q6TXE7_RAT	ENSRNOG00000019504;ENSRNOG00000062013	AABR07026536.1;Adprhl1	2
sp|Q5XIH6|TRI54_RAT;sp|Q5PQN5|TRI55_RAT	ENSRNOG00000006146;ENSRNOG00000012723	Trim54;Trim55	2
tr|F1LSW7|F1LSW7_RAT;sp|Q63507|RL14_RAT;tr|B5DEM5|B5DEM5_RAT;tr|Q6TUH8|Q6TUH8_RAT	ENSRNOG00000019007;ENSRNOG00000031061	LOC306079;Rpl14	2
tr|A0A0G2K3Z9|A0A0G2K3Z9_RAT;sp|Q63716|PRDX1_RAT	ENSRNOG00000017194;ENSRNOG00000017695	AABR07012795.1;Prdx1	2
tr|A0A0G2K6H7|A0A0G2K6H7_RAT;tr|M0RD20|M0RD20_RAT;sp|Q64537|CPNS1_RAT	ENSRNOG00000060312	Capns1;LOC108348197	2
sp|Q6AYE2|SHLB1_RAT;tr|A0A0G2K714|A0A0G2K714_RAT;tr|A0A0G2K9P4|A0A0G2K9P4_RAT;sp|Q5PPJ9|SHLB2_RAT	ENSRNOG00000012957;ENSRNOG00000017295	Sh3glb1;Sh3glb2	2
sp|Q6B345|S10AB_RAT;tr|F1LYQ0|F1LYQ0_RAT	ENSRNOG00000010105;ENSRNOG00000040101	AABR07026805.2;S100a11	2
sp|Q6LED0|H31_RAT		H3c1;Hist1h2ail1;Hist1h3b	3
tr|D4A1P2|D4A1P2_RAT;sp|Q6PDV7|RL10_RAT	ENSRNOG00000032720;ENSRNOG00000056765	Rpl10;Rpl10l	2
sp|Q6PEC0|AP4A_RAT;tr|D3ZH27|D3ZH27_RAT	ENSRNOG00000013110	LOC100910067;Nudt2	2
sp|Q6RUV5|RAC1_RAT;tr|A0A0G2K0X4|A0A0G2K0X4_RAT;tr|M0R5T4|M0R5T4_RAT;tr|Q5U1Y2|Q5U1Y2_RAT	ENSRNOG00000001068;ENSRNOG00000007350	Rac1;Rac2	2
sp|Q6URK4-2|ROA3_RAT;sp|Q6URK4|ROA3_RAT;tr|E9PSU5|E9PSU5_RAT;tr|D4A6A2|D4A6A2_RAT	ENSRNOG00000038905;ENSRNOG00000052968	AABR07048397.1;Hnrnpa3	2
tr|D4A250|D4A250_RAT;tr|B5DFB2|B5DFB2_RAT;sp|Q71UF4|RBBP7_RAT	ENSRNOG00000005157;ENSRNOG00000021492	Rbbp4;Rbbp7	2
sp|Q78P75|DYL2_RAT;sp|P63170|DYL1_RAT	ENSRNOG00000008921;ENSRNOG00000011222	Dynll1;Dynll2	2
sp|Q7M0E3|DEST_RAT;tr|D4A315|D4A315_RAT	ENSRNOG00000005924;ENSRNOG00000026891	AC093995.1;Dstn	2
sp|Q8VIF7|SBP1_RAT;tr|F1LRJ9|F1LRJ9_RAT	ENSRNOG00000047158;ENSRNOG00000053812	LOC103689947;Selenbp1	2
tr|A0A0G2JVE9|A0A0G2JVE9_RAT;tr|A0A096P6L2|A0A096P6L2_RAT;sp|Q8VIG2|MARF1_RAT	ENSRNOG00000056248	LOC103689943;Marf1	2
tr|A0A0G2K9Y5|A0A0G2K9Y5_RAT;sp|Q99PS8|HRG_RAT;tr|A0A0G2K3G0|A0A0G2K3G0_RAT	ENSRNOG00000001809	Hrg;LOC681544	2
tr|A0A140TAI1|A0A140TAI1_RAT;sp|Q9JJP9|UBQL1_RAT;tr|D4A3P1|D4A3P1_RAT;tr|D4AA63|D4AA63_RAT	ENSRNOG00000003099;ENSRNOG00000019282;ENSRNOG00000019933	Ubqln1;Ubqln2;Ubqln4	3
sp|Q9JJW3|ATPMK_RAT	ENSRNOG00000020296;ENSRNOG00000042869	Atp5mk;LOC103693430	2
tr|A0A0G2JY69|A0A0G2JY69_RAT;tr|G3V907|G3V907_RAT;sp|Q9QYU1|PEX19_RAT		LOC102548286;Pex19	2
tr|F1LP21|F1LP21_RAT;sp|Q9WVA1|TIM8A_RAT;tr|F1M556|F1M556_RAT;tr|D3ZV76|D3ZV76_RAT	ENSRNOG00000011226;ENSRNOG00000013835;ENSRNOG00000043480	AABR07071440.1;Timm8a1;Timm8a2	3
tr|G3V9Q3|G3V9Q3_RAT;tr|A0A0G2JTG7|A0A0G2JTG7_RAT;sp|Q8VHV7-3|HNRH1_RAT;sp|Q8VHV7|HNRH1_RAT;sp|Q8VHV7-2|HNRH1_RAT;sp|Q6AY09|HNRH2_RAT	ENSRNOG00000003399;ENSRNOG00000011661	Hnrnph1;Hnrnph2	2
tr|A0A0G2JTW9|A0A0G2JTW9_RAT	ENSRNOG00000047098;ENSRNOG00000061299	Hbb-b1;Hbb-bs;LOC100134871	3
tr|F7EPH4|F7EPH4_RAT;tr|A0A0G2JUD2|A0A0G2JUD2_RAT	ENSRNOG00000000557	Ppa1;Sar1a	2
tr|B4F7C9|B4F7C9_RAT;tr|A0A0G2JWH5|A0A0G2JWH5_RAT	ENSRNOG00000031896	Chek1;Stt3a	2
tr|A0A0G2JWM7|A0A0G2JWM7_RAT;tr|F1M3K4|F1M3K4_RAT	ENSRNOG00000026584;ENSRNOG00000056251	Ifnl1;Ifnl3	2
tr|A0A0G2K0W9|A0A0G2K0W9_RAT;sp|P48004-2|PSA7_RAT;sp|P48004|PSA7_RAT;tr|F1M6I7|F1M6I7_RAT	ENSRNOG00000030363;ENSRNOG00000056853	Psma7;Psma8	2
tr|A0A0G2K290|A0A0G2K290_RAT;tr|A0A0G2K3A6|A0A0G2K3A6_RAT;tr|A0A0G2JUY4|A0A0G2JUY4_RAT;tr|A0A0G2K4A4|A0A0G2K4A4_RAT;tr|M0RBL2|M0RBL2_RAT;tr|A0A0G2JWW4|A0A0G2JWW4_RAT	ENSRNOG00000048458;ENSRNOG00000049243;ENSRNOG00000050912;ENSRNOG00000053312;ENSRNOG00000056043;ENSRNOG00000056760;ENSRNOG00000056828;ENSRNOG00000058352;ENSRNOG00000059121	AABR07065651.4;AABR07065656.3;AABR07065656.4;AABR07065656.8;AABR07065684.1;AABR07065699.4;AABR07065705.1;AABR07065705.3;AABR07065714.1	9
tr|A0A0G2K4K2|A0A0G2K4K2_RAT;tr|M0RBP7|M0RBP7_RAT	ENSRNOG00000047535;ENSRNOG00000059910	AABR07051670.1;AABR07051689.1	2
tr|A0A0G2K4U2|A0A0G2K4U2_RAT	ENSRNOG00000018937	Gstm2;Gstm7	2
tr|A0A0G2K719|A0A0G2K719_RAT;tr|A0A0G2K9N3|A0A0G2K9N3_RAT;tr|D3ZN21|D3ZN21_RAT;tr|D4ADE8|D4ADE8_RAT	ENSRNOG00000002501;ENSRNOG00000023383	Ddx3x;Ddx3y	2
tr|A0A0G2K9Y0|A0A0G2K9Y0_RAT;tr|F1LPQ6|F1LPQ6_RAT;sp|P20759|IGHG1_RAT;tr|F1LN61|F1LN61_RAT	ENSRNOG00000030332;ENSRNOG00000034190	Ighg1;Ighm	2
tr|F1M706|F1M706_RAT;tr|A0A140TAI6|A0A140TAI6_RAT;tr|D3ZZ95|D3ZZ95_RAT;tr|M0RCN1|M0RCN1_RAT;tr|D4A1Q0|D4A1Q0_RAT;sp|P39032|RL36_RAT;tr|D3ZJJ6|D3ZJJ6_RAT	ENSRNOG00000002340;ENSRNOG00000029560;ENSRNOG00000029988;ENSRNOG00000031947;ENSRNOG00000033473;ENSRNOG00000055777	AABR07007675.1;AABR07064980.1;AABR07071986.1;AABR07072272.1;LOC100361079;Rpl36	6
tr|B0BNJ9|B0BNJ9_RAT;tr|M0R701|M0R701_RAT;sp|Q924P2|TM14C_RAT	ENSRNOG00000015437;ENSRNOG00000022144	AABR07072356.1;Tmem14c	2
tr|B2GV65|B2GV65_RAT;tr|D3ZU87|D3ZU87_RAT	ENSRNOG00000001071;ENSRNOG00000017372	AABR07035091.1;Higd2a	2
tr|B5DEL8|B5DEL8_RAT;tr|A0A0G2JZJ9|A0A0G2JZJ9_RAT	ENSRNOG00000026646;ENSRNOG00000029339;ENSRNOG00000052764	AABR07016779.1;LOC100363268;Ndufs5	3
tr|D3ZE15|D3ZE15_RAT;tr|F1LZC5|F1LZC5_RAT	ENSRNOG00000020602;ENSRNOG00000021688	AABR07056686.1;Ndufa13	2
tr|D3ZFY8|D3ZFY8_RAT;tr|A0A0G2JU07|A0A0G2JU07_RAT;sp|Q7M767|UB2V2_RAT	ENSRNOG00000001829;ENSRNOG00000025580	LOC679539;Ube2v1;Ube2v2	3
tr|D3ZHA7|D3ZHA7_RAT;tr|M0RDP3|M0RDP3_RAT	ENSRNOG00000003860;ENSRNOG00000028837	AABR07038250.1;AC128207.1	2
tr|D3ZJ08|D3ZJ08_RAT		H3c13;Hist2h3c2;LOC102548682;LOC102549173	4
tr|Q642E2|Q642E2_RAT;tr|D3ZJD3|D3ZJD3_RAT;sp|P17702|RL28_RAT;tr|D3ZEI0|D3ZEI0_RAT;tr|A0A0G2K8E0|A0A0G2K8E0_RAT	ENSRNOG00000009240;ENSRNOG00000017127;ENSRNOG00000037673;ENSRNOG00000061441	AABR07016623.1;AABR07071891.1;AABR07071935.1;Rpl28	4
tr|D3ZNS7|D3ZNS7_RAT;tr|D3ZRJ7|D3ZRJ7_RAT	ENSRNOG00000012730;ENSRNOG00000014027	Lrrk1;RGD1304728	2
tr|D3ZQR5|D3ZQR5_RAT;tr|F1M663|F1M663_RAT	ENSRNOG00000048017;ENSRNOG00000048182	AABR07051684.1;AABR07056026.1	2
tr|D3ZSP1|D3ZSP1_RAT;tr|D4A8M5|D4A8M5_RAT;tr|F7ETL6|F7ETL6_RAT	ENSRNOG00000017086;ENSRNOG00000034206	AABR07054367.1;AC096024.2	2
tr|M0R785|M0R785_RAT;tr|D3ZTR5|D3ZTR5_RAT;tr|A0A0G2K6U2|A0A0G2K6U2_RAT	ENSRNOG00000000918;ENSRNOG00000053790	AABR07036007.1;Zbed5	2
tr|D3ZUY8|D3ZUY8_RAT;sp|P18484|AP2A2_RAT;tr|Q66HM2|Q66HM2_RAT;tr|A0A0G2K943|A0A0G2K943_RAT	ENSRNOG00000019534;ENSRNOG00000026243	Ap2a1;Ap2a2	2
tr|D3ZXP3|D3ZXP3_RAT;tr|D3ZWE0|D3ZWE0_RAT	ENSRNOG00000010386;ENSRNOG00000048317	H2ac21;H2ax	2
tr|D4A4P3|D4A4P3_RAT;tr|M0RA24|M0RA24_RAT	ENSRNOG00000011825;ENSRNOG00000048888	AABR07060996.1;Ndufb3	2
tr|E9PTW1|E9PTW1_RAT;tr|A0A0G2K5Q8|A0A0G2K5Q8_RAT	ENSRNOG00000020500	Clk2;Scamp3	2
tr|F1LPG5|F1LPG5_RAT;tr|F1M7T1|F1M7T1_RAT;tr|D3ZV29|D3ZV29_RAT	ENSRNOG00000002721;ENSRNOG00000034289	AABR07014298.1;Ndufb4	2
tr|F1M9D6|F1M9D6_RAT;tr|A0A0G2JX93|A0A0G2JX93_RAT	ENSRNOG00000014079	Stat1;Stat4	2
tr|G3V7C6|G3V7C6_RAT;sp|Q6P9T8|TBB4B_RAT;tr|B4F7C2|B4F7C2_RAT	ENSRNOG00000010170;ENSRNOG00000047505	Tubb4a;Tubb4b	2
tr|G3V9N0|G3V9N0_RAT;tr|D3ZSR2|D3ZSR2_RAT;sp|Q9EPH8|PABP1_RAT	ENSRNOG00000008639;ENSRNOG00000015642	Pabpc1;Pabpc4	2
tr|Q5RK17|Q5RK17_RAT;tr|D4A7Z5|D4A7Z5_RAT	ENSRNOG00000008548;ENSRNOG00000029197	Diablo;LOC100360940	2
tr|Q5U3Y8|Q5U3Y8_RAT;tr|M0R5M7|M0R5M7_RAT	ENSRNOG00000016912;ENSRNOG00000031864	AABR07021871.1;Btf3	2
tr|Q6IMX8|Q6IMX8_RAT;sp|O55171|ACOT2_RAT;sp|O88267|ACOT1_RAT	ENSRNOG00000010134;ENSRNOG00000055221	Acot1;Acot2	2
tr|Q6PDV8|Q6PDV8_RAT;sp|P47198|RL22_RAT	ENSRNOG00000011104;ENSRNOG00000028747	LOC100360057;Rpl22	2
tr|Q6PDW1|Q6PDW1_RAT;sp|P63324|RS12_RAT;tr|D3ZHB3|D3ZHB3_RAT	ENSRNOG00000016411;ENSRNOG00000020093	LOC100360573;Rps12	2
tr|M0RDM4|M0RDM4_RAT;sp|A9UMV8|H2AJ_RAT;tr|Q6I8Q6|Q6I8Q6_RAT;tr|M0RCL5|M0RCL5_RAT;tr|G3V9C0|G3V9C0_RAT;tr|D3ZVK7|D3ZVK7_RAT;sp|Q64598|H2A1F_RAT;sp|Q4FZT6|H2A3_RAT;sp|Q00728|H2A4_RAT;sp|P0C170|H2A1E_RAT;sp|P0C169|H2A1C_RAT		H2ac1;H2ac4;H2aj;Hist1h2ac;Hist1h2af;Hist1h2ah;Hist1h2ai;hist1h2ail2;Hist1h2an;Hist3h2a;LOC100910554;LOC103690190;LOC684773	13
sp|O08590|AOC3_RAT;tr|A0A0G2JWZ2|A0A0G2JWZ2_RAT	ENSRNOG00000051307;ENSRNOG00000053448	AC123346.1;Aoc3	2
tr|A0A0G2JSV6|A0A0G2JSV6_RAT;sp|P01946|HBA_RAT	ENSRNOG00000029886;ENSRNOG00000047321	Hba-a1;Hba-a2	2
tr|A0A0G2JSW3|A0A0G2JSW3_RAT;sp|P02091|HBB1_RAT;sp|P11517|HBB2_RAT	ENSRNOG00000047098;ENSRNOG00000058105;ENSRNOG00000061299	Hbb;Hbb-bs;LOC100134871	3
tr|D4ACV3|D4ACV3_RAT;sp|P0CC09|H2A2A_RAT;sp|P02262|H2A1_RAT	ENSRNOG00000047898;ENSRNOG00000052555	Hist2h2aa2;Hist2h2aa3	2
sp|P04642|LDHA_RAT;tr|H9N9H4|H9N9H4_RAT;tr|Q6AYX2|Q6AYX2_RAT;sp|P19629|LDHC_RAT	ENSRNOG00000013009;ENSRNOG00000013103	Ldha;Ldhc	2
tr|M0R590|M0R590_RAT;sp|P04797|G3P_RAT;tr|D3ZGY4|D3ZGY4_RAT;tr|M0R660|M0R660_RAT;tr|E9PTN6|E9PTN6_RAT;tr|A0A0G2K8S2|A0A0G2K8S2_RAT;tr|E9PTV9|E9PTV9_RAT	ENSRNOG00000018630;ENSRNOG00000028958;ENSRNOG00000033057;ENSRNOG00000038610;ENSRNOG00000048704;ENSRNOG00000050630	AABR07024795.1;AABR07025010.1;AABR07032392.1;AABR07034445.1;AABR07070043.1;Gapdh;LOC108351137	7
sp|P05065|ALDOA_RAT;tr|Q6AY07|Q6AY07_RAT	ENSRNOG00000030869;ENSRNOG00000052802	Aldoa;Aldoart2	2
tr|A0A0A0MXW3|A0A0A0MXW3_RAT;tr|D4AEC0|D4AEC0_RAT;sp|P0C0S7|H2AZ_RAT;tr|D3ZXP3|D3ZXP3_RAT	ENSRNOG00000010306;ENSRNOG00000010386;ENSRNOG00000052275	H2ax;H2az1;H2az2	3
sp|P10111|PPIA_RAT;tr|A0A0G2K1P0|A0A0G2K1P0_RAT;tr|A0A0G2K2E4|A0A0G2K2E4_RAT	ENSRNOG00000027864;ENSRNOG00000031045;ENSRNOG00000055068	LOC100911252;Ppia;Ppial4d	3
sp|Q64578|AT2A1_RAT;sp|P11507-2|AT2A2_RAT;sp|P11507|AT2A2_RAT;tr|A0A0G2K9N9|A0A0G2K9N9_RAT;tr|G3V9U7|G3V9U7_RAT;sp|P18596|AT2A3_RAT;tr|D3ZHJ6|D3ZHJ6_RAT;sp|P18596-1|AT2A3_RAT	ENSRNOG00000001285;ENSRNOG00000017912	Atp2a1;Atp2a2;Atp2a3	3
tr|M0R5V7|M0R5V7_RAT;sp|Q6IE52|MUG2_RAT;tr|A0A0G2JUP5|A0A0G2JUP5_RAT;tr|D4AA52|D4AA52_RAT;tr|A0A0G2K926|A0A0G2K926_RAT;sp|P14046|A1I3_RAT;sp|Q03626-2|MUG1_RAT;tr|D4A6E3|D4A6E3_RAT;tr|A0A0G2JUW7|A0A0G2JUW7_RAT;sp|Q03626|MUG1_RAT;tr|G3V9J1|G3V9J1_RAT	ENSRNOG00000033245;ENSRNOG00000037188;ENSRNOG00000042228	AABR07061950.1;LOC297568;Mug1;Mug2	4
tr|F1LP05|F1LP05_RAT;sp|P15999|ATPA_RAT;tr|A0A0G2K099|A0A0G2K099_RAT	ENSRNOG00000017032;ENSRNOG00000054846	AABR07022393.1;Atp5f1a	2
sp|P35213-2|1433B_RAT;sp|P68255|1433T_RAT;sp|P63102|1433Z_RAT;sp|P68511|1433F_RAT;sp|P35213|1433B_RAT;sp|P61983|1433G_RAT;tr|Q5EBB0|Q5EBB0_RAT;tr|G3V9A3|G3V9A3_RAT;sp|P62260|1433E_RAT;tr|A0A0G2JV65|A0A0G2JV65_RAT;tr|A0A0G2K2B8|A0A0G2K2B8_RAT	ENSRNOG00000001436;ENSRNOG00000004188;ENSRNOG00000005290;ENSRNOG00000008195;ENSRNOG00000010945;ENSRNOG00000051650;ENSRNOG00000055471	LOC298795;Ywhab;Ywhae;Ywhag;Ywhah;Ywhaq;Ywhaz	7
tr|D3ZTK5|D3ZTK5_RAT;tr|M0R7P0|M0R7P0_RAT;sp|P61354|RL27_RAT	ENSRNOG00000020674;ENSRNOG00000033603;ENSRNOG00000053282;ENSRNOG00000060888	AABR07034315.1;AABR07070594.1;AABR07070689.2;Rpl27	4
tr|M0R757|M0R757_RAT;sp|P62630|EF1A1_RAT;tr|F1M6C2|F1M6C2_RAT;sp|P62632|EF1A2_RAT	ENSRNOG00000009439;ENSRNOG00000012477;ENSRNOG00000029996	AABR07054368.1;Eef1a1;Eef1a2	3
sp|P62804|H4_RAT		Hist1h2ao;Hist1h4b;Hist1h4m;Hist2h4	4
sp|P62909|RS3_RAT;tr|D3ZVH2|D3ZVH2_RAT	ENSRNOG00000007605;ENSRNOG00000017418	AABR07052430.1;Rps3	2
tr|A0A0G2JVI3|A0A0G2JVI3_RAT;tr|D4A4S3|D4A4S3_RAT;tr|F1LZI1|F1LZI1_RAT;sp|P63018|HSP7C_RAT;tr|M0RCB1|M0RCB1_RAT;tr|M0R8M9|M0R8M9_RAT	ENSRNOG00000032585;ENSRNOG00000034066;ENSRNOG00000034093;ENSRNOG00000061099	AABR07011951.1;AABR07033324.1;AABR07048992.1;Hspa8	4
sp|P63259|ACTG_RAT	ENSRNOG00000036701;ENSRNOG00000053452	Actg1;LOC100361457	2
sp|P68136|ACTS_RAT;sp|P68035|ACTC_RAT;tr|A0A0G2K4M6|A0A0G2K4M6_RAT;sp|P62738|ACTA_RAT;sp|P63269|ACTH_RAT	ENSRNOG00000008536;ENSRNOG00000017786;ENSRNOG00000029401;ENSRNOG00000058039	Acta1;Acta2;Actc1;Actg2	4
sp|P68370|TBA1A_RAT;tr|A0A0H2UHM7|A0A0H2UHM7_RAT;sp|Q6AYZ1|TBA1C_RAT;sp|Q68FR8|TBA3_RAT;sp|Q6AY56|TBA8_RAT	ENSRNOG00000021438;ENSRNOG00000031707;ENSRNOG00000032967;ENSRNOG00000048169;ENSRNOG00000060728	Tuba1a;Tuba1c;Tuba3a;Tuba3b;Tuba8	5
sp|P69897|TBB5_RAT;sp|Q3KRE8|TBB2B_RAT;sp|P85108|TBB2A_RAT;sp|Q4QRB4|TBB3_RAT;sp|P69897-2|TBB5_RAT	ENSRNOG00000017209;ENSRNOG00000017445;ENSRNOG00000017558;ENSRNOG00000061216	Tubb2a;Tubb2b;Tubb3;Tubb5	4
tr|M0RBX6|M0RBX6_RAT;tr|D3ZK97|D3ZK97_RAT;tr|D3ZJ08|D3ZJ08_RAT;sp|Q6LED0|H31_RAT;sp|P84245|H33_RAT;tr|A0A0G2K0N8|A0A0G2K0N8_RAT;tr|A0A0G2K9I5|A0A0G2K9I5_RAT		AABR07027811.2;AC119603.1;H3c1;H3c13;H3f3a;H3f3b;H3f3c;Hist1h2ail1;Hist1h3b;Hist2h3c2;LOC102548682;LOC102549173;RGD1564548	13
sp|Q00715|H2B1_RAT;tr|M0R4L7|M0R4L7_RAT;tr|G3V9C7|G3V9C7_RAT;tr|G3V8B3|G3V8B3_RAT;tr|D3ZWM5|D3ZWM5_RAT;tr|A0A0G2JXE0|A0A0G2JXE0_RAT;tr|D3ZNH4|D3ZNH4_RAT;tr|A0A0G2JXI9|A0A0G2JXI9_RAT;tr|D3ZLY9|D3ZLY9_RAT;tr|D4A817|D4A817_RAT;tr|A0A0G2K7R1|A0A0G2K7R1_RAT;tr|M0RBQ5|M0RBQ5_RAT;tr|D3ZNZ9|D3ZNZ9_RAT;sp|Q00729|H2B1A_RAT	ENSRNOG00000016865;ENSRNOG00000021198;ENSRNOG00000031790;ENSRNOG00000043419;ENSRNOG00000045753;ENSRNOG00000047776;ENSRNOG00000053845;ENSRNOG00000054296;ENSRNOG00000055512;ENSRNOG00000058187;ENSRNOG00000058263;ENSRNOG00000059093;ENSRNOG00000059382;ENSRNOG00000059949;ENSRNOG00000060769	AABR07012583.2;H2bc1;H2bc12;H2bc9;H2bu1;Hist1h2bc;Hist1h2bd;Hist1h2bg;Hist1h2bl;Hist1h2bo;Hist1h2bq;Hist2h2be;Hist3h2ba;LOC100364835;LOC100365043;LOC100910200;LOC102549061;LOC684797	18
tr|F1LP67|F1LP67_RAT;tr|A0A0G2K776|A0A0G2K776_RAT;sp|Q62969|PTGIS_RAT	ENSRNOG00000008245	AABR07054614.1;Ptgis	2
tr|A0A0G2K3Z9|A0A0G2K3Z9_RAT;sp|Q63716|PRDX1_RAT	ENSRNOG00000017194;ENSRNOG00000017695	AABR07012795.1;Prdx1	2
sp|Q6P9T8|TBB4B_RAT;tr|G3V7C6|G3V7C6_RAT;tr|B4F7C2|B4F7C2_RAT	ENSRNOG00000010170;ENSRNOG00000047505	Tubb4a;Tubb4b	2
sp|Q6P9V9|TBA1B_RAT;sp|Q5XIF6|TBA4A_RAT	ENSRNOG00000003597;ENSRNOG00000053468	Tuba1b;Tuba4a	2
tr|Q6GMN8|Q6GMN8_RAT;tr|A0A0G2K013|A0A0G2K013_RAT;sp|Q9Z1P2|ACTN1_RAT;tr|A0A0G2K5U9|A0A0G2K5U9_RAT;sp|Q9QXQ0|ACTN4_RAT;tr|Q6T487|Q6T487_RAT	ENSRNOG00000020433;ENSRNOG00000056756	Actn1;Actn4	2
tr|A0A0G2K654|A0A0G2K654_RAT;tr|M0R7B4|M0R7B4_RAT	ENSRNOG00000048264;ENSRNOG00000054978	H1f2;H4f3	2
tr|A0A096MJJ6|A0A096MJJ6_RAT;sp|A0FKI7-2|ACBD5_RAT;sp|A0FKI7|ACBD5_RAT;sp|A0FKI7-3|ACBD5_RAT;tr|M0R9S4|M0R9S4_RAT;tr|A0A0G2K3Z5|A0A0G2K3Z5_RAT	ENSRNOG00000017642;ENSRNOG00000046845	AABR07028887.1;Acbd5	2
sp|A9UMV8|H2AJ_RAT;sp|P0C170|H2A1E_RAT;sp|P0C169|H2A1C_RAT;tr|M0RDM4|M0RDM4_RAT;tr|G3V9C0|G3V9C0_RAT;tr|D3ZVK7|D3ZVK7_RAT;sp|Q4FZT6|H2A3_RAT;tr|Q6I8Q6|Q6I8Q6_RAT;tr|M0RCL5|M0RCL5_RAT;sp|Q64598|H2A1F_RAT		H2ac4;H2aj;Hist1h2ac;Hist1h2af;Hist1h2ah;Hist1h2ai;hist1h2ail2;Hist1h2an;Hist3h2a;LOC100910554;LOC103690190;LOC684773	12
sp|B2GUV7|IF2P_RAT;tr|M0R7Z0|M0R7Z0_RAT;tr|A0A0H2UHV4|A0A0H2UHV4_RAT	ENSRNOG00000023356;ENSRNOG00000046621	AABR07043748.1;Eif5b	2
tr|M0R5F8|M0R5F8_RAT;sp|B4F777|HMGN5_RAT	ENSRNOG00000029078;ENSRNOG00000049192	Hmgn5;Hmgn5b	2
sp|B5DFN2|SAHH2_RAT;tr|A0A140TAI8|A0A140TAI8_RAT;tr|D3ZWL6|D3ZWL6_RAT	ENSRNOG00000018569;ENSRNOG00000039300	Ahcyl1;Ahcyl2	2
sp|D4A1R8|CPNE1_RAT	ENSRNOG00000019723;ENSRNOG00000050864	Cpne1;Rbm12	2
sp|F1LM93|YES_RAT;tr|Q6AXQ3|Q6AXQ3_RAT;tr|A0A0G2K2V7|A0A0G2K2V7_RAT;tr|A0A0G2K2E3|A0A0G2K2E3_RAT;tr|A0A096MKC1|A0A096MKC1_RAT;sp|Q62844|FYN_RAT	ENSRNOG00000000596;ENSRNOG00000037227	Fyn;Yes1	2
tr|F1M754|F1M754_RAT;tr|A0A0G2K382|A0A0G2K382_RAT;sp|F1LP90|MINK1_RAT;tr|A0A0G2JV77|A0A0G2JV77_RAT;tr|A0A0G2K7W4|A0A0G2K7W4_RAT;tr|F1LN69|F1LN69_RAT;tr|D3ZZQ0|D3ZZQ0_RAT;tr|A0A0G2K490|A0A0G2K490_RAT	ENSRNOG00000012422;ENSRNOG00000014013;ENSRNOG00000033508	Map4k4;Mink1;Tnik	3
sp|M0RC99|RAB5A_RAT	ENSRNOG00000057056	Rab5a;Rab5al1	2
sp|O35509|RB11B_RAT;tr|A0A0G2JZR4|A0A0G2JZR4_RAT;sp|P62494|RB11A_RAT	ENSRNOG00000007648;ENSRNOG00000011302	Rab11a;Rab11b	2
tr|G3V603|G3V603_RAT;sp|O54835|SMAD9_RAT;tr|A0A0G2K0P2|A0A0G2K0P2_RAT;sp|P84025|SMAD3_RAT;sp|O70436|SMAD2_RAT		Smad2;Smad3;Smad9	3
sp|O70377|SNP23_RAT;tr|M0R4V3|M0R4V3_RAT	ENSRNOG00000050552	AABR07053516.1;Snap23	2
sp|O70631|EST2C_RAT;tr|A0A0G2K0C1|A0A0G2K0C1_RAT;tr|A0A0G2K455|A0A0G2K455_RAT	ENSRNOG00000036571	Ces2;Ces2c;LOC100365112	3
sp|O88377|PI42B_RAT;tr|F1LX22|F1LX22_RAT;sp|Q9R0I8|PI42A_RAT	ENSRNOG00000013030;ENSRNOG00000016670	AABR07028769.1;Pip4k2a;Pip4k2b	3
sp|O88777|PSN2_RAT;sp|P97887|PSN1_RAT	ENSRNOG00000002879;ENSRNOG00000009110	Psen1;Psen2	2
tr|D3Z900|D3Z900_RAT;sp|O88994|MARC2_RAT;tr|M0R6N2|M0R6N2_RAT	ENSRNOG00000037850	LOC100910481;Mtarc2	2
sp|P01946|HBA_RAT	ENSRNOG00000029886;ENSRNOG00000047321	Hba-a1;Hba-a2	2
sp|P02793|FRIL1_RAT;tr|F1M5T1|F1M5T1_RAT;tr|M0R6L9|M0R6L9_RAT;tr|M0R597|M0R597_RAT;sp|Q7TP54|RIPR2_RAT;tr|M0R5T8|M0R5T8_RAT	ENSRNOG00000004662;ENSRNOG00000018804;ENSRNOG00000020843;ENSRNOG00000029082;ENSRNOG00000031506;ENSRNOG00000031540;ENSRNOG00000033776	AABR07005031.1;AC115277.1;Ftl1;LOC100359668;LOC100360087;LOC100362384;Ripor2	7
sp|P02803|MT1_RAT;tr|A0A0H2UHT7|A0A0H2UHT7_RAT	ENSRNOG00000025764;ENSRNOG00000038047	AC128848.1;Mt1	2
tr|D3ZHV3|D3ZHV3_RAT;sp|P04355|MT2_RAT	ENSRNOG00000028841;ENSRNOG00000043098	Mt1m;Mt2A	2
tr|A0A0H2UHQ8|A0A0H2UHQ8_RAT;tr|D3ZFA8|D3ZFA8_RAT;sp|P04644|RS17_RAT;tr|D3ZHU9|D3ZHU9_RAT;tr|D3ZKG6|D3ZKG6_RAT	ENSRNOG00000019106;ENSRNOG00000032765;ENSRNOG00000045885;ENSRNOG00000048927	AABR07018533.1;AABR07068536.1;LOC100365810;Rps17	4
tr|D3ZZN4|D3ZZN4_RAT;sp|P04646|RL35A_RAT;tr|D4A771|D4A771_RAT;tr|A0A096P6M4|A0A096P6M4_RAT;tr|F1M0T2|F1M0T2_RAT	ENSRNOG00000030217;ENSRNOG00000031694;ENSRNOG00000032303;ENSRNOG00000033058;ENSRNOG00000033625;ENSRNOG00000047557;ENSRNOG00000049536	AABR07027015.1;AABR07030122.1;AABR07053188.1;AABR07064810.1;LOC103690996;LOC108349682;Rpl35al1	7
tr|M0R5J4|M0R5J4_RAT;sp|P04764|ENOA_RAT	ENSRNOG00000017895;ENSRNOG00000028543	AABR07052523.1;Eno1	2
sp|P04797|G3P_RAT;tr|M0R590|M0R590_RAT;tr|D3ZGY4|D3ZGY4_RAT;tr|M0R660|M0R660_RAT	ENSRNOG00000018630;ENSRNOG00000033057;ENSRNOG00000050630	AABR07025010.1;AABR07070043.1;Gapdh;LOC108351137	4
sp|P05065|ALDOA_RAT;tr|Q6AY07|Q6AY07_RAT	ENSRNOG00000030869;ENSRNOG00000052802	Aldoa;Aldoart2	2
tr|A0A0G2JXC3|A0A0G2JXC3_RAT;sp|P05765|RS21_RAT;tr|D3ZSE0|D3ZSE0_RAT	ENSRNOG00000033916;ENSRNOG00000060449	AC141489.1;Rps21	2
sp|P06302|PTMA_RAT	ENSRNOG00000018584;ENSRNOG00000025731	LOC100359583;Ptma	2
sp|P06536-2|GCR_RAT;sp|P06536|GCR_RAT;tr|G3V7U9|G3V7U9_RAT	ENSRNOG00000014096;ENSRNOG00000048800	AABR07031756.1;Nr3c1	2
sp|P08661|MBL2_RAT;tr|A0A140UHW8|A0A140UHW8_RAT	ENSRNOG00000011637;ENSRNOG00000050305	AABR07006691.1;Mbl2	2
sp|P09875|UD2B1_RAT;tr|A0A0G2JUD3|A0A0G2JUD3_RAT	ENSRNOG00000001990	Ugt2b10;Ugt2b17	2
sp|P09895|RL5_RAT;tr|D3ZHP8|D3ZHP8_RAT	ENSRNOG00000023529;ENSRNOG00000037220	AABR07031089.1;Rpl5	2
tr|A0A0A0MXW3|A0A0A0MXW3_RAT;tr|D4AEC0|D4AEC0_RAT;sp|P0C0S7|H2AZ_RAT	ENSRNOG00000010306;ENSRNOG00000052275	H2az1;H2az2	2
tr|D4ACV3|D4ACV3_RAT;sp|P0CC09|H2A2A_RAT	ENSRNOG00000047898;ENSRNOG00000052555	Hist2h2aa2;Hist2h2aa3	2
sp|P0DMW1|HS71B_RAT;sp|P0DMW0|HS71A_RAT		Hspa1a;Hspa1b	2
sp|P0DP31|CALM3_RAT;sp|P0DP30|CALM2_RAT;sp|P0DP29|CALM1_RAT;tr|D4ABV5|D4ABV5_RAT	ENSRNOG00000004060;ENSRNOG00000016770;ENSRNOG00000030871	Calm1;Calm2;Calm3	3
sp|P10111|PPIA_RAT;tr|A0A0G2K1P0|A0A0G2K1P0_RAT;tr|A0A0G2K2E4|A0A0G2K2E4_RAT	ENSRNOG00000027864;ENSRNOG00000031045;ENSRNOG00000055068	LOC100911252;Ppia;Ppial4d	3
sp|P11517|HBB2_RAT	ENSRNOG00000047098;ENSRNOG00000061299	Hbb-bs;LOC100134871	2
sp|P12938|CP2D3_RAT;tr|A0A0G2JYL2|A0A0G2JYL2_RAT	ENSRNOG00000029179	Cyp2d1;Cyp2d3	2
tr|Q6PDV6|Q6PDV6_RAT;sp|P13471|RS14_RAT	ENSRNOG00000018774	LOC100911847;Rps14	2
sp|P15149|CP2A2_RAT;tr|Z4YNS8|Z4YNS8_RAT	ENSRNOG00000020817	Cyp2a1;Cyp2a2	2
sp|P15337|CREB1_RAT;sp|P15337-1|CREB1_RAT;tr|A0A0G2K748|A0A0G2K748_RAT;tr|D3ZXY8|D3ZXY8_RAT;tr|F7FD47|F7FD47_RAT;tr|A0A0G2JYV9|A0A0G2JYV9_RAT;sp|Q03061-1|CREM_RAT	ENSRNOG00000013412;ENSRNOG00000014900;ENSRNOG00000061088	Atf1;Creb1;Crem	3
sp|P15429|ENOB_RAT;sp|P07323|ENOG_RAT	ENSRNOG00000004078;ENSRNOG00000013141	Eno2;Eno3	2
sp|P15865|H14_RAT;tr|M0R7B4|M0R7B4_RAT	ENSRNOG00000047459;ENSRNOG00000048264	H1f4;H4f3	2
tr|D4A6G6|D4A6G6_RAT;sp|P17074|RS19_RAT;tr|A0A0H2UI38|A0A0H2UI38_RAT;tr|F1M764|F1M764_RAT;tr|F1M8C7|F1M8C7_RAT;tr|D3ZGN8|D3ZGN8_RAT;tr|D3ZUD7|D3ZUD7_RAT	ENSRNOG00000005430;ENSRNOG00000013292;ENSRNOG00000032482;ENSRNOG00000037897	AABR07029006.1;AABR07040944.1;AC117101.1;Rps19;Rps19l2	5
tr|A0A0G2JXD0|A0A0G2JXD0_RAT;sp|P17077|RL9_RAT;tr|M0RBD4|M0RBD4_RAT;tr|M0R6B4|M0R6B4_RAT;tr|F1M7A9|F1M7A9_RAT	ENSRNOG00000026716;ENSRNOG00000028449;ENSRNOG00000030476;ENSRNOG00000031879;ENSRNOG00000052909;ENSRNOG00000055770;ENSRNOG00000058695;ENSRNOG00000061320	AABR07026048.1;AABR07036746.1;AABR07050391.2;AABR07050399.1;LOC100360449;LOC100364457;LOC103692829;Rpl9	8
sp|P17078|RL35_RAT;tr|F1M6G3|F1M6G3_RAT;tr|D3ZN79|D3ZN79_RAT	ENSRNOG00000003158;ENSRNOG00000014272;ENSRNOG00000030364	AABR07031666.1;AABR07037343.1;Rpl35	3
sp|P17136|RSMB_RAT;sp|P63164|RSMN_RAT;tr|Q5XII7|Q5XII7_RAT	ENSRNOG00000006961;ENSRNOG00000059764	Snrpb;Snrpn	2
sp|P18395|CSDE1_RAT	ENSRNOG00000046533;ENSRNOG00000061058	Csde1;LOC100364335	2
sp|P18422|PSA3_RAT	ENSRNOG00000007851	Psma3;Psma3l	2
tr|A0A0G2K7W6|A0A0G2K7W6_RAT;sp|P18445|RL27A_RAT;tr|D3ZI60|D3ZI60_RAT;tr|D4AAY6|D4AAY6_RAT	ENSRNOG00000014214;ENSRNOG00000031273;ENSRNOG00000031736	AABR07034639.1;LOC108351703;Rpl27a	3
sp|P19939|APOC1_RAT;tr|A0A0G2K9R5|A0A0G2K9R5_RAT;tr|M0R547|M0R547_RAT	ENSRNOG00000018426	Apoc1;LOC100910181	2
sp|P19944|RLA1_RAT;tr|A0A0H2UHJ3|A0A0H2UHJ3_RAT	ENSRNOG00000011955;ENSRNOG00000013874	AABR07026997.1;LOC100360522;Rplp1	3
tr|A0A0G2JXU4|A0A0G2JXU4_RAT;tr|A0A0G2K8B6|A0A0G2K8B6_RAT;sp|P20812|CP2A3_RAT	ENSRNOG00000020817	Cyp2a1;Cyp2a3	2
sp|P21533|RL6_RAT;tr|F1LQS3|F1LQS3_RAT;tr|A0A0G2KBA1|A0A0G2KBA1_RAT	ENSRNOG00000025936;ENSRNOG00000055942	AC120310.1;Rpl6	2
sp|P22789|ST2A2_RAT;tr|F1M7G5|F1M7G5_RAT	ENSRNOG00000047986	Sult2a1;Sult2a2;Sult2a6	3
sp|P23358|RL12_RAT;tr|A0A140TAC5|A0A140TAC5_RAT;tr|M0R4B6|M0R4B6_RAT;tr|D3ZJE2|D3ZJE2_RAT		LOC102555453;Rpl12	2
sp|P23640|RB27A_RAT;sp|Q99P74|RB27B_RAT	ENSRNOG00000012176;ENSRNOG00000052499	Rab27a;Rab27b	2
sp|P24049|RL17_RAT;tr|A0A0H2UHQ1|A0A0H2UHQ1_RAT;tr|F1LZX7|F1LZX7_RAT;tr|D3Z9G9|D3Z9G9_RAT;tr|A0A0G2KB77|A0A0G2KB77_RAT	ENSRNOG00000018680;ENSRNOG00000022022;ENSRNOG00000029262	AABR07053166.1;AC128967.1;Rpl17	3
sp|P24090|FETUA_RAT;tr|F1LM19|F1LM19_RAT;tr|Q7TP75|Q7TP75_RAT	ENSRNOG00000038370	AABR07034632.1;Ahsg	2
tr|A0A0U1RVI9|A0A0U1RVI9_RAT;sp|P27952|RS2_RAT;tr|E9PT76|E9PT76_RAT;tr|A0A0G2KB28|A0A0G2KB28_RAT;tr|D3ZQW7|D3ZQW7_RAT	ENSRNOG00000014179;ENSRNOG00000022934;ENSRNOG00000030174;ENSRNOG00000037380	AABR07042903.1;AABR07066818.1;AC136661.1;Rps2	4
tr|A0A0G2JSL0|A0A0G2JSL0_RAT;sp|P28073|PSB6_RAT	ENSRNOG00000011827;ENSRNOG00000019551	LOC100360846;Psmb6	2
sp|P29314|RS9_RAT;tr|A0A0G2K4C4|A0A0G2K4C4_RAT;tr|D3ZV50|D3ZV50_RAT	ENSRNOG00000039203;ENSRNOG00000058909	AABR07040892.1;Rps9;Rps9l1	3
sp|P29418|ATP5E_RAT;tr|M0R601|M0R601_RAT	ENSRNOG00000045749;ENSRNOG00000049912	AC105515.1;Atp5f1e	2
sp|P30083|VIPR1_RAT;tr|M0R7K6|M0R7K6_RAT	ENSRNOG00000047457	AABR07071765.1;Vipr1	2
sp|P30713|GSTT2_RAT;tr|A0A0G2K3C6|A0A0G2K3C6_RAT	ENSRNOG00000052415	Gstt2;LOC103694879	2
sp|P35171|CX7A2_RAT	ENSRNOG00000042903	Cox7a2;Cox7a2l2	2
sp|P35435|ATPG_RAT;tr|Q6PCU0|Q6PCU0_RAT;tr|Q6QI09|Q6QI09_RAT	ENSRNOG00000019223	Atp5f1c;Taf3	2
sp|P39069|KAD1_RAT;tr|A0A0G2K7Q6|A0A0G2K7Q6_RAT;tr|M0RC66|M0RC66_RAT	ENSRNOG00000049056	AABR07051450.1;Ak1	2
sp|P41123|RL13_RAT;tr|A0A0G2JYG9|A0A0G2JYG9_RAT;tr|F1M2E9|F1M2E9_RAT;tr|D3ZRM9|D3ZRM9_RAT;tr|D3ZD02|D3ZD02_RAT	ENSRNOG00000015335;ENSRNOG00000029227;ENSRNOG00000059545	AABR07054469.1;AC114446.1;Rpl13	3
sp|P47727|CBR1_RAT;tr|M0R3X6|M0R3X6_RAT;tr|A0A0G2JSV2|A0A0G2JSV2_RAT;tr|A0A0G2K658|A0A0G2K658_RAT;tr|A0A096MJ24|A0A096MJ24_RAT	ENSRNOG00000049693;ENSRNOG00000049911	Cbr1;LOC102556347	2
sp|P48500|TPIS_RAT;tr|A0A0G2JWJ4|A0A0G2JWJ4_RAT;tr|A0A0G2JWU1|A0A0G2JWU1_RAT	ENSRNOG00000015290;ENSRNOG00000055222	AC094212.1;Tpi1	2
sp|P51583|PUR6_RAT;tr|F8WFR8|F8WFR8_RAT;tr|A0A0G2K5S4|A0A0G2K5S4_RAT	ENSRNOG00000002101;ENSRNOG00000056398	AABR07036855.1;Paics	2
tr|A2VD07|A2VD07_RAT;sp|P51870|CP4F5_RAT;tr|F7F0Y6|F7F0Y6_RAT	ENSRNOG00000042496;ENSRNOG00000048450	Cyp4f37;Cyp4f5	2
sp|P52925|HMGB2_RAT;tr|D3ZS25|D3ZS25_RAT;tr|D3ZN59|D3ZN59_RAT	ENSRNOG00000013167;ENSRNOG00000026462;ENSRNOG00000029107;ENSRNOG00000033321	AABR07015743.1;Hmgb2;Hmgb2l1;RGD1559962	4
sp|P55006|RDH7_RAT;tr|F1LVY2|F1LVY2_RAT;tr|A0A0U1RVK8|A0A0U1RVK8_RAT	ENSRNOG00000004391	AABR07057436.1;Rdh7	2
sp|P55770|NH2L1_RAT	ENSRNOG00000006762;ENSRNOG00000025154	LOC100359574;Snu13	2
sp|P60522|GBRL2_RAT	ENSRNOG00000019425	Gabarapl2;LOC100359937	2
tr|A0A0H2UHG7|A0A0H2UHG7_RAT;tr|D3ZZK1|D3ZZK1_RAT;tr|A0A0G2K6L6|A0A0G2K6L6_RAT;sp|P60868|RS20_RAT;tr|A0A0G2JY70|A0A0G2JY70_RAT;tr|M0RB28|M0RB28_RAT;tr|M0R5V6|M0R5V6_RAT;tr|M0R566|M0R566_RAT;tr|A0A0G2K8W1|A0A0G2K8W1_RAT;tr|M0R987|M0R987_RAT	ENSRNOG00000008555;ENSRNOG00000029341;ENSRNOG00000029627;ENSRNOG00000029843;ENSRNOG00000030345;ENSRNOG00000030426;ENSRNOG00000030596;ENSRNOG00000031205;ENSRNOG00000048426;ENSRNOG00000054540;ENSRNOG00000055526;ENSRNOG00000056863;ENSRNOG00000059138;ENSRNOG00000061454	AABR07036375.1;AABR07043775.1;AABR07043776.1;AABR07044509.1;AABR07050116.1;AABR07070957.1;AC121204.2;AC126292.2;AC136584.1;LOC100359951;LOC100362149;LOC100362684;LOC100364116;Rps20	14
sp|P60892|PRPS1_RAT;tr|A0A0G2JSV3|A0A0G2JSV3_RAT;tr|M0RBK1|M0RBK1_RAT	ENSRNOG00000032513;ENSRNOG00000056011;ENSRNOG00000060262	LOC314140;Prps1;Prps1l1	3
tr|A0A0G2JV81|A0A0G2JV81_RAT;sp|P84079|ARF1_RAT;sp|P61206|ARF3_RAT;tr|A0A0G2K9H8|A0A0G2K9H8_RAT;sp|P84082|ARF2_RAT;tr|A0A0G2K4Q4|A0A0G2K4Q4_RAT	ENSRNOG00000004807;ENSRNOG00000054775;ENSRNOG00000057515;ENSRNOG00000060229	AABR07046136.1;Arf1;Arf2;Arf3;Fkbp11	5
sp|P61354|RL27_RAT;tr|D3ZTK5|D3ZTK5_RAT;tr|M0R7P0|M0R7P0_RAT	ENSRNOG00000020674;ENSRNOG00000033603;ENSRNOG00000053282;ENSRNOG00000060888	AABR07034315.1;AABR07070594.1;AABR07070689.2;Rpl27	4
tr|A0A0H2UHU1|A0A0H2UHU1_RAT;sp|P61515|RL37P_RAT;sp|D4AAZ6|RL37A_RAT;tr|D4A7B1|D4A7B1_RAT	ENSRNOG00000028883	AABR07072078.1;Rpl37a	2
sp|P62083|RS7_RAT	ENSRNOG00000008551;ENSRNOG00000027694	LOC100362830;Rps7	2
sp|P62243|RS8_RAT;tr|M0R7Q5|M0R7Q5_RAT;tr|Q6TXJ0|Q6TXJ0_RAT;tr|D3ZIE1|D3ZIE1_RAT	ENSRNOG00000007238;ENSRNOG00000054626	LOC297756;Rps8	2
sp|P62246|RS15A_RAT;tr|A0A0G2K6I0|A0A0G2K6I0_RAT;tr|D3ZLL8|D3ZLL8_RAT;tr|D3ZZC7|D3ZZC7_RAT;tr|D3ZS61|D3ZS61_RAT	ENSRNOG00000018320;ENSRNOG00000030447;ENSRNOG00000032877	AABR07072261.1;AC105662.1;Rps15a	3
sp|P62268|RS23_RAT;tr|D4A9Q3|D4A9Q3_RAT;tr|F1LTW8|F1LTW8_RAT	ENSRNOG00000016580;ENSRNOG00000029461;ENSRNOG00000034052	AABR07071482.2;AABR07072400.1;Rps23	3
tr|A0A0H2UHT6|A0A0H2UHT6_RAT;tr|D3ZM33|D3ZM33_RAT;sp|P62271|RS18_RAT;tr|M0R5K9|M0R5K9_RAT;tr|A0A0G2KA79|A0A0G2KA79_RAT;tr|D3ZAU6|D3ZAU6_RAT	ENSRNOG00000014169;ENSRNOG00000028505;ENSRNOG00000030107;ENSRNOG00000032944;ENSRNOG00000033152;ENSRNOG00000033451	AABR07042892.1;AABR07049320.1;AABR07049329.1;AABR07057460.1;Rps18;Rps18l1	6
sp|P62275|RS29_RAT	ENSRNOG00000004196;ENSRNOG00000028939	LOC108350501;LOC108351482;LOC108352650;Rps29	4
sp|P62278|RS13_RAT;tr|M0RCY2|M0RCY2_RAT	ENSRNOG00000028021;ENSRNOG00000048698	AABR07048031.1;LOC684988;Rps13	3
tr|F1M013|F1M013_RAT;sp|P62425|RL7A_RAT;tr|D3ZU22|D3ZU22_RAT;tr|D3ZPL5|D3ZPL5_RAT;tr|D4A6B9|D4A6B9_RAT;tr|D3ZJH5|D3ZJH5_RAT;tr|M0R3M3|M0R3M3_RAT;tr|F1M1M2|F1M1M2_RAT	ENSRNOG00000028826;ENSRNOG00000029423;ENSRNOG00000031532;ENSRNOG00000031902;ENSRNOG00000033843;ENSRNOG00000047737;ENSRNOG00000049097	AABR07007121.1;AABR07018167.1;AABR07027819.1;AABR07052519.1;AC128901.1;Rpl7a	6
sp|P62630|EF1A1_RAT;tr|M0R757|M0R757_RAT;tr|F1M6C2|F1M6C2_RAT	ENSRNOG00000009439;ENSRNOG00000029996	AABR07054368.1;Eef1a1	2
tr|X1WI37|X1WI37_RAT;sp|P62703|RS4X_RAT;tr|A0A0H2UHX3|A0A0H2UHX3_RAT;tr|D3ZX01|D3ZX01_RAT	ENSRNOG00000003201;ENSRNOG00000031041	Rps4x;Rps4y2	2
sp|P62718|RL18A_RAT;tr|F1M0K6|F1M0K6_RAT	ENSRNOG00000018795;ENSRNOG00000042547	AABR07001902.1;Rpl18a	2
tr|A0A0G2K4M6|A0A0G2K4M6_RAT;sp|P62738|ACTA_RAT;sp|P63269|ACTH_RAT	ENSRNOG00000029401;ENSRNOG00000058039	Acta2;Actg2	2
tr|F1LT35|F1LT35_RAT;tr|D3ZTH8|D3ZTH8_RAT;sp|P62752|RL23A_RAT;tr|D4AAL7|D4AAL7_RAT;tr|D3ZTX9|D3ZTX9_RAT;tr|D3ZFK7|D3ZFK7_RAT	ENSRNOG00000023344;ENSRNOG00000029859;ENSRNOG00000032148;ENSRNOG00000032771	AABR07018050.1;AABR07021384.1;AABR07064811.1;Rpl23a	4
sp|P62804|H4_RAT		Hist1h2ao;Hist1h4b;Hist1h4m;Hist2h4	4
sp|P62828|RAN_RAT;tr|Q66H11|Q66H11_RAT;sp|Q8K586|RANT_RAT	ENSRNOG00000000938;ENSRNOG00000031013;ENSRNOG00000032913	Ran;Rasl2-9;RGD1306195	3
sp|P62845|RS15_RAT;tr|D3ZAK6|D3ZAK6_RAT	ENSRNOG00000024603;ENSRNOG00000043026	AC128207.2;Rps15	2
tr|A0A0H2UHU0|A0A0H2UHU0_RAT;sp|P62853|RS25_RAT;tr|F1M6F4|F1M6F4_RAT;tr|D4AE10|D4AE10_RAT;tr|M0R763|M0R763_RAT	ENSRNOG00000027503;ENSRNOG00000029737;ENSRNOG00000031703;ENSRNOG00000047151;ENSRNOG00000055406	AABR07050701.1;AABR07061383.1;AABR07063959.1;AABR07071294.1;AABR07073045.1;Rps25	6
sp|P62856|RS26_RAT;tr|D3Z8D7|D3Z8D7_RAT;tr|A0A0G2K743|A0A0G2K743_RAT;tr|D3ZJ54|D3ZJ54_RAT;tr|A0A0G2JY64|A0A0G2JY64_RAT	ENSRNOG00000029512;ENSRNOG00000056532	AC126292.3;LOC100360508;LOC100361854;Rps26	4
sp|P62859|RS28_RAT;tr|A0A0A0MY14|A0A0A0MY14_RAT	ENSRNOG00000042886;ENSRNOG00000046342	LOC100359503;Rps28	2
sp|P62870|ELOB_RAT;tr|A0A140TA99|A0A140TA99_RAT;tr|F1M937|F1M937_RAT	ENSRNOG00000004814;ENSRNOG00000033199	AABR07068955.1;Elob	2
sp|P62890|RL30_RAT;tr|A0A0G2K5E6|A0A0G2K5E6_RAT	ENSRNOG00000005975;ENSRNOG00000021406;ENSRNOG00000032825	LOC100362027;LOC108351936;Rpl30	3
tr|D4A5L9|D4A5L9_RAT;sp|P62898|CYC_RAT	ENSRNOG00000010452;ENSRNOG00000032885;ENSRNOG00000033559	AC128290.1;Cycs;LOC100363502	3
sp|P62902|RL31_RAT;tr|D3ZX87|D3ZX87_RAT;tr|D4ACQ2|D4ACQ2_RAT;tr|D4ABZ9|D4ABZ9_RAT;tr|D3ZK34|D3ZK34_RAT;tr|D3ZU04|D3ZU04_RAT;tr|D3ZKU5|D3ZKU5_RAT;tr|D3ZVY6|D3ZVY6_RAT;tr|D3Z8W1|D3Z8W1_RAT;tr|D3ZZ60|D3ZZ60_RAT;tr|A0A0G2K7E3|A0A0G2K7E3_RAT	ENSRNOG00000013508;ENSRNOG00000025536;ENSRNOG00000029278;ENSRNOG00000030278;ENSRNOG00000030296;ENSRNOG00000031313;ENSRNOG00000033024;ENSRNOG00000039487;ENSRNOG00000050226;ENSRNOG00000050666	AABR07017576.1;AABR07018331.1;AABR07021008.1;AABR07031947.1;AABR07032277.1;AABR07059675.1;AABR07071195.1;AC099453.1;AC103024.1;Rpl31	10
sp|P62909|RS3_RAT;tr|D3ZVH2|D3ZVH2_RAT	ENSRNOG00000007605;ENSRNOG00000017418	AABR07052430.1;Rps3	2
sp|P62912|RL32_RAT;tr|D4A412|D4A412_RAT	ENSRNOG00000008516;ENSRNOG00000010746	AABR07049516.1;Rpl32	2
tr|D4A6W6|D4A6W6_RAT;sp|P62919|RL8_RAT		AC129049.1;LOC100360117;Rpl8	3
sp|P62959|HINT1_RAT;tr|D4A269|D4A269_RAT	ENSRNOG00000000622;ENSRNOG00000005630	AABR07060778.1;Hint1	2
sp|P62982|RS27A_RAT;sp|P62986|RL40_RAT;tr|F1LU69|F1LU69_RAT;sp|P0CG51|UBB_RAT;tr|F1LML2|F1LML2_RAT;sp|Q63429|UBC_RAT	ENSRNOG00000004426;ENSRNOG00000019974;ENSRNOG00000057823	Rps27a;Uba52;Ubc	3
sp|P63018|HSP7C_RAT;tr|M0RCB1|M0RCB1_RAT;tr|D4A4S3|D4A4S3_RAT;tr|F1LZI1|F1LZI1_RAT;tr|M0R8M9|M0R8M9_RAT;tr|A0A0G2JVI3|A0A0G2JVI3_RAT	ENSRNOG00000032585;ENSRNOG00000034066;ENSRNOG00000034093;ENSRNOG00000061099	AABR07011951.1;AABR07033324.1;AABR07048992.1;Hspa8	4
tr|A0A0H2UHV6|A0A0H2UHV6_RAT;sp|P63100|CANB1_RAT;sp|P63100-2|CANB1_RAT;tr|A0A0G2K4H3|A0A0G2K4H3_RAT	ENSRNOG00000043210;ENSRNOG00000057321	AABR07016428.1;Ppp3r1	2
tr|D3ZCR3|D3ZCR3_RAT;sp|P63159|HMGB1_RAT;tr|A0A0G2K6P4|A0A0G2K6P4_RAT;tr|D3ZXR5|D3ZXR5_RAT;tr|D3ZC69|D3ZC69_RAT;tr|D3ZGW6|D3ZGW6_RAT;tr|M0R7R5|M0R7R5_RAT;tr|F1LNG6|F1LNG6_RAT	ENSRNOG00000029813;ENSRNOG00000032420;ENSRNOG00000034130;ENSRNOG00000038478;ENSRNOG00000048094;ENSRNOG00000048471;ENSRNOG00000051482;ENSRNOG00000058908	AABR07029613.1;AABR07035218.1;AABR07054355.1;AABR07054358.1;AC108595.1;Hmg1l1;Hmgb1;LOC108349189	8
tr|D4AD70|D4AD70_RAT;sp|P63174|RL38_RAT;tr|D3ZW57|D3ZW57_RAT;tr|D3ZZH2|D3ZZH2_RAT	ENSRNOG00000030747;ENSRNOG00000031434;ENSRNOG00000032847;ENSRNOG00000033484;ENSRNOG00000048701	AABR07039377.1;AABR07060145.1;AC098064.1;LOC685963;LOC690468;Rpl38	6
sp|P63259|ACTG_RAT	ENSRNOG00000036701;ENSRNOG00000053452	Actg1;LOC100361457	2
sp|P63312|TYB10_RAT		LOC100364435;Tmsb10	2
sp|P63326|RS10_RAT;tr|F1LT36|F1LT36_RAT;tr|A0A0H2UI18|A0A0H2UI18_RAT;tr|D3ZJY5|D3ZJY5_RAT		AABR07017250.1;Rps10;Rps10l1	3
sp|P63329-2|PP2BA_RAT;sp|P63329|PP2BA_RAT;tr|A0A0G2K7T5|A0A0G2K7T5_RAT;sp|P20651|PP2BB_RAT	ENSRNOG00000009882;ENSRNOG00000054782	Ppp3ca;Ppp3cb	2
sp|P70583|DUT_RAT;tr|D4A6V3|D4A6V3_RAT	ENSRNOG00000007221;ENSRNOG00000017412	AABR07001512.1;Dut	2
sp|P83883|RL36A_RAT;tr|F8WFR5|F8WFR5_RAT	ENSRNOG00000011494;ENSRNOG00000031022;ENSRNOG00000032408	RGD1566373;Rpl36a;Rpl36al	3
sp|P83888|TBG1_RAT;tr|F1LUW9|F1LUW9_RAT	ENSRNOG00000006494;ENSRNOG00000020213	Tubg1;Tubg2	2
sp|P83941|ELOC_RAT;tr|A0A096MIY6|A0A096MIY6_RAT;tr|A0A0G2K2A0|A0A0G2K2A0_RAT	ENSRNOG00000031730;ENSRNOG00000051063;ENSRNOG00000061371	AABR07035541.3;AABR07044940.1;Eloc	3
tr|Q56R20|Q56R20_RAT;sp|P83953|IMA5_RAT;tr|A0A0H2UHW5|A0A0H2UHW5_RAT;sp|Q56R16|IMA6_RAT	ENSRNOG00000030109;ENSRNOG00000051711	Kpna1;Kpna5	2
sp|P84100|RL19_RAT;tr|F1M5A9|F1M5A9_RAT	ENSRNOG00000004741;ENSRNOG00000005826	RGD1562420;Rpl19	2
tr|D3ZK97|D3ZK97_RAT;sp|P84245|H33_RAT;tr|M0RBX6|M0RBX6_RAT;tr|A0A0G2K0N8|A0A0G2K0N8_RAT	ENSRNOG00000003220;ENSRNOG00000006532;ENSRNOG00000032401;ENSRNOG00000045778;ENSRNOG00000053155	AABR07027811.2;AC119603.1;H3f3a;H3f3b;H3f3c	5
sp|P85968|6PGD_RAT;tr|A0A0G2K7Q8|A0A0G2K7Q8_RAT	ENSRNOG00000057626	Kif1b;Pgd	2
sp|P97612|FAAH1_RAT	ENSRNOG00000011019;ENSRNOG00000045949	Faah;Faahl	2
sp|Q06606|GRZ2_RAT;tr|A0A0G2KAZ8|A0A0G2KAZ8_RAT	ENSRNOG00000049991	Mcpt10;Mcpt8	2
sp|Q07969|CD36_RAT;tr|Q6IMX5|Q6IMX5_RAT;tr|A0A0G2JYC5|A0A0G2JYC5_RAT;tr|A0A096MJ39|A0A096MJ39_RAT;tr|A0A096MJJ0|A0A096MJJ0_RAT;tr|F7F5B5|F7F5B5_RAT;tr|D4A8Z2|D4A8Z2_RAT	ENSRNOG00000043176	AABR07059308.1;Cd36	2
tr|G3V9C8|G3V9C8_RAT;sp|Q08201|MDR3_RAT	ENSRNOG00000008012	Abcb1a;Abcb4	2
sp|Q27W02|MGN_RAT;tr|F1M0X6|F1M0X6_RAT	ENSRNOG00000010316;ENSRNOG00000012778	Magoh;Magohb	2
tr|M0R8A4|M0R8A4_RAT;sp|Q3B8Q0|MARE2_RAT;tr|M0R7M8|M0R7M8_RAT	ENSRNOG00000047261;ENSRNOG00000049681	AABR07031445.1;AABR07031491.2;Mapre2	3
sp|Q3T1J1|IF5A1_RAT;tr|G3V7J7|G3V7J7_RAT	ENSRNOG00000011859;ENSRNOG00000016478	Eif5a;Eif5a2	2
tr|D4A1V7|D4A1V7_RAT;sp|Q3T1J9|MOB1A_RAT	ENSRNOG00000010996;ENSRNOG00000059474	Mob1a;Mob1b	2
sp|Q4AEF8|COPG1_RAT;tr|A0A0G2K1F3|A0A0G2K1F3_RAT	ENSRNOG00000010474	Copg1;Hmces	2
sp|Q4KLL0|TCEA1_RAT	ENSRNOG00000022323	LOC498453;Tcea1	2
sp|Q4KLP0|DHTK1_RAT;tr|A0A0U1RRZ4|A0A0U1RRZ4_RAT	ENSRNOG00000023587;ENSRNOG00000062048	AC141220.4;Dhtkd1	2
sp|Q4KLY4|RING2_RAT;tr|A0A0G2JTP7|A0A0G2JTP7_RAT;sp|Q6MGB6-2|RING1_RAT;sp|Q6MGB6|RING1_RAT	ENSRNOG00000000467;ENSRNOG00000002454	Ring1;Rnf2	2
sp|Q4QQW4|HDAC1_RAT;tr|D3ZVU7|D3ZVU7_RAT	ENSRNOG00000009568;ENSRNOG00000013695	Hdac1;Hdac1l	2
tr|M0R635|M0R635_RAT;tr|A0JPQ5|A0JPQ5_RAT;sp|Q4V8K3|NAA11_RAT	ENSRNOG00000002031;ENSRNOG00000057774	LOC100909833;Naa11;RGD1560212	3
sp|Q505I4|CO040_RAT	ENSRNOG00000052273	LOC100363116;RGD1305713	2
sp|Q561S0|NDUAA_RAT;tr|A0A1W2Q6F8|A0A1W2Q6F8_RAT	ENSRNOG00000016470;ENSRNOG00000062245	Ndufa10;Ndufa10l1	2
sp|Q5BJN5|MIA40_RAT	ENSRNOG00000022466;ENSRNOG00000033038	Chchd4;LOC100361898	2
sp|Q5BJP2|CWC15_RAT;tr|D3ZS22|D3ZS22_RAT	ENSRNOG00000008490;ENSRNOG00000025157	AABR07008904.1;Cwc15	2
tr|D3ZH23|D3ZH23_RAT;sp|Q5BJX1|RM41_RAT	ENSRNOG00000029875;ENSRNOG00000034128	Mrpl41;RGD1560917	2
sp|Q5FVQ4|MLEC_RAT;tr|A0A0G2K121|A0A0G2K121_RAT	ENSRNOG00000021725	Mlec;Unc119b	2
sp|Q5HZV9|PP1R7_RAT;tr|R9PXV7|R9PXV7_RAT	ENSRNOG00000016974	AABR07068351.1;Ppp1r7	2
sp|Q5I0P2|GCSH_RAT;tr|A0A0G2JZ02|A0A0G2JZ02_RAT	ENSRNOG00000011535;ENSRNOG00000051496	AABR07007134.1;Gcsh	2
sp|Q5RJP0|ALD1_RAT;tr|F7EMK8|F7EMK8_RAT;tr|Q6AY99|Q6AY99_RAT	ENSRNOG00000009875	Akr1b10;Akr1b7	2
sp|Q5XI89|NXPE4_RAT;tr|A0A0G2JV58|A0A0G2JV58_RAT	ENSRNOG00000059851	AABR07070117.1;Nxpe4	2
tr|A0A0G2K9Q7|A0A0G2K9Q7_RAT;sp|Q62625-2|MLP3B_RAT;sp|Q62625|MLP3B_RAT;sp|Q6XVN8|MLP3A_RAT;tr|Q7TQ75|Q7TQ75_RAT	ENSRNOG00000017905;ENSRNOG00000025443	Map1lc3a;Map1lc3b	2
tr|Q5FVT1|Q5FVT1_RAT;sp|Q62796|RBP1_RAT;tr|A0A0G2K694|A0A0G2K694_RAT;tr|A0A096MJZ4|A0A096MJZ4_RAT	ENSRNOG00000013461;ENSRNOG00000051147	AABR07011057.2;Ralbp1	2
sp|Q63486|RRAGA_RAT;sp|Q63487-2|RRAGB_RAT;sp|Q63487|RRAGB_RAT		Rraga;RragB	2
tr|F1LSW7|F1LSW7_RAT;sp|Q63507|RL14_RAT;tr|B5DEM5|B5DEM5_RAT;tr|Q6TUH8|Q6TUH8_RAT	ENSRNOG00000019007;ENSRNOG00000031061	LOC306079;Rpl14	2
tr|A0A0G2K3Z9|A0A0G2K3Z9_RAT;sp|Q63716|PRDX1_RAT	ENSRNOG00000017194;ENSRNOG00000017695	AABR07012795.1;Prdx1	2
sp|Q641Z4|CDK9_RAT;tr|D3ZSZ0|D3ZSZ0_RAT;sp|P39951|CDK1_RAT;tr|Q6P751|Q6P751_RAT;sp|Q63699|CDK2_RAT;tr|F1MA87|F1MA87_RAT;tr|M0R7D0|M0R7D0_RAT;sp|Q3MJK5-2|CDK12_RAT;tr|A0A0G2K5U7|A0A0G2K5U7_RAT;sp|Q3MJK5|CDK12_RAT	ENSRNOG00000000632;ENSRNOG00000006000;ENSRNOG00000006469;ENSRNOG00000007151;ENSRNOG00000009258;ENSRNOG00000022586	Cdk1;Cdk12;Cdk14;Cdk2;Cdk6;Cdk9	6
sp|Q64LC9|RBM4B_RAT;tr|D4A1W5|D4A1W5_RAT;tr|Q5U212|Q5U212_RAT	ENSRNOG00000050741;ENSRNOG00000061795	Rbm4;Rbm4b	2
sp|Q66HG8|RED_RAT;tr|A0A0G2K5G9|A0A0G2K5G9_RAT;tr|Q6QI75|Q6QI75_RAT	ENSRNOG00000017251	Ik;Wdr55	2
sp|Q6AYK1|RNPS1_RAT;tr|F1M6U2|F1M6U2_RAT	ENSRNOG00000008703;ENSRNOG00000027239	AABR07037800.1;Rnps1	2
tr|A0A0G2K3Z3|A0A0G2K3Z3_RAT;tr|B0BN19|B0BN19_RAT;sp|Q6GQP4|RAB31_RAT;tr|A0A0G2JSZ1|A0A0G2JSZ1_RAT	ENSRNOG00000005762;ENSRNOG00000042189	Rab22a;Rab31	2
sp|Q6LED0|H31_RAT		H3c1;Hist1h2ail1;Hist1h3b	3
sp|Q6P791|LTOR1_RAT	ENSRNOG00000020016	Lamtor1;LOC100361543	2
sp|Q6PEC1|TBCA_RAT;tr|F1M825|F1M825_RAT	ENSRNOG00000016100;ENSRNOG00000048342	AABR07058934.1;Tbca	2
sp|Q6U6G5|ZC3HF_RAT;tr|D4AA59|D4AA59_RAT	ENSRNOG00000005256;ENSRNOG00000060002	AC115670.2;Zc3h15	2
sp|Q6URK4-2|ROA3_RAT;tr|E9PSU5|E9PSU5_RAT;tr|D4A6A2|D4A6A2_RAT	ENSRNOG00000038905;ENSRNOG00000052968	AABR07048397.1;Hnrnpa3	2
sp|Q712U5|ARP19_RAT;sp|Q712U5-2|ARP19_RAT	ENSRNOG00000023086	Arpp19;LOC100360828	2
sp|Q71S46|AT5G3_RAT;sp|Q06645|AT5G1_RAT;tr|Q499S2|Q499S2_RAT;sp|Q06646|AT5G2_RAT	ENSRNOG00000001596;ENSRNOG00000007235;ENSRNOG00000015320	Atp5mc1;Atp5mc2;Atp5mc3	3
sp|Q71TY3|RS27_RAT;tr|M0RA26|M0RA26_RAT	ENSRNOG00000016961;ENSRNOG00000021159	LOC100362987;Rps27	2
sp|Q78EG7|TP4A1_RAT;sp|Q6P9X4|TP4A2_RAT	ENSRNOG00000011771;ENSRNOG00000050044	Ptp4a1;Ptp4a2	2
sp|Q8VIF7|SBP1_RAT;tr|F1LRJ9|F1LRJ9_RAT	ENSRNOG00000047158;ENSRNOG00000053812	LOC103689947;Selenbp1	2
tr|A0A0G2K9Y5|A0A0G2K9Y5_RAT;sp|Q99PS8|HRG_RAT;tr|A0A0G2K3G0|A0A0G2K3G0_RAT	ENSRNOG00000001809	Hrg;LOC681544	2
tr|A0A0G2K613|A0A0G2K613_RAT;sp|Q9EPH2|MRP_RAT	ENSRNOG00000009113;ENSRNOG00000054614	AABR07002779.1;Marcksl1	2
sp|Q9JJW3|ATPMK_RAT	ENSRNOG00000020296;ENSRNOG00000042869	Atp5mk;LOC103693430	2
tr|F1MAH8|F1MAH8_RAT;sp|Q9JK25|CLIP1_RAT;tr|A0A0G2K681|A0A0G2K681_RAT;tr|A0A0G2JZF2|A0A0G2JZF2_RAT;sp|O55156|CLIP2_RAT;tr|G3V949|G3V949_RAT	ENSRNOG00000001247;ENSRNOG00000021611	Clip1;Clip2	2
sp|Q9JK66-6|PRKN_RAT;sp|Q9JK66-3|PRKN_RAT;tr|A0A0G2K9U8|A0A0G2K9U8_RAT;sp|Q9JK66-2|PRKN_RAT;sp|Q9JK66|PRKN_RAT;sp|Q9JK66-4|PRKN_RAT;tr|A0A0G2K740|A0A0G2K740_RAT;sp|Q9JK66-5|PRKN_RAT	ENSRNOG00000055547	AABR07001519.1;Prkn	2
sp|Q9QXT3|NAT8_RAT;sp|Q9JIY6|CMLO6_RAT	ENSRNOG00000015851	Nat8;Nat8b	2
sp|Q9QZ81|AGO2_RAT;tr|F1LRP7|F1LRP7_RAT;tr|F1LUS2|F1LUS2_RAT	ENSRNOG00000008533;ENSRNOG00000034269	Ago2;Ago3	2
tr|F1LZL1|F1LZL1_RAT;sp|Q9WUW8|ST1C2_RAT;tr|A0A0G2K1B3|A0A0G2K1B3_RAT		LOC100910057;Sult1c2	2
tr|A0A0H2UHP9|A0A0H2UHP9_RAT;sp|Q9WVB1|RAB6A_RAT;tr|A0A0G2JT78|A0A0G2JT78_RAT	ENSRNOG00000009198;ENSRNOG00000018176	Rab6a;Rab6b	2
tr|A0A096MK80|A0A096MK80_RAT;tr|A0A096MIZ1|A0A096MIZ1_RAT;tr|D4A4D8|D4A4D8_RAT	ENSRNOG00000025558;ENSRNOG00000051069	AC134204.1;Palm2	2
tr|A0A0G2JTW9|A0A0G2JTW9_RAT	ENSRNOG00000047098;ENSRNOG00000061299	Hbb-b1;Hbb-bs;LOC100134871	3
tr|A0A0G2JV42|A0A0G2JV42_RAT;tr|M0R789|M0R789_RAT;tr|F1M1G3|F1M1G3_RAT;tr|M0R628|M0R628_RAT;tr|A0A0G2KAZ1|A0A0G2KAZ1_RAT;tr|A0A0G2K458|A0A0G2K458_RAT	ENSRNOG00000047162;ENSRNOG00000053899;ENSRNOG00000053956;ENSRNOG00000057280;ENSRNOG00000057344;ENSRNOG00000058552	AABR07013116.1;AABR07051731.1;AABR07051733.1;AABR07051733.2;AABR07051733.3;AABR07051746.1	6
tr|A0A0G2JW98|A0A0G2JW98_RAT	ENSRNOG00000012436	Adh1;Adh6	2
tr|B4F7C9|B4F7C9_RAT;tr|A0A0G2JWH5|A0A0G2JWH5_RAT	ENSRNOG00000031896	Chek1;Stt3a	2
tr|A0A0G2JWZ2|A0A0G2JWZ2_RAT;tr|Q5FVM2|Q5FVM2_RAT	ENSRNOG00000051344;ENSRNOG00000053448	AC123346.1;Psme3	2
tr|A0A0G2JX93|A0A0G2JX93_RAT	ENSRNOG00000014079	Stat1;Stat4	2
tr|A0A0G2JXF0|A0A0G2JXF0_RAT;tr|A0A0G2K3L5|A0A0G2K3L5_RAT	ENSRNOG00000051739;ENSRNOG00000056290	AABR07061001.1;AABR07061052.1	2
tr|G3V9C7|G3V9C7_RAT;tr|G3V8B3|G3V8B3_RAT;tr|A0A0G2JXI9|A0A0G2JXI9_RAT;tr|M0R4L7|M0R4L7_RAT;tr|D3ZWM5|D3ZWM5_RAT;tr|A0A0G2JXE0|A0A0G2JXE0_RAT;tr|D3ZNH4|D3ZNH4_RAT;sp|Q00715|H2B1_RAT;tr|D3ZLY9|D3ZLY9_RAT;tr|D4A817|D4A817_RAT;sp|Q00729|H2B1A_RAT;tr|M0RBQ5|M0RBQ5_RAT;tr|D3ZNZ9|D3ZNZ9_RAT	ENSRNOG00000016865;ENSRNOG00000021198;ENSRNOG00000031790;ENSRNOG00000043419;ENSRNOG00000045753;ENSRNOG00000047776;ENSRNOG00000053845;ENSRNOG00000054296;ENSRNOG00000055512;ENSRNOG00000058187;ENSRNOG00000058263;ENSRNOG00000059382;ENSRNOG00000059949;ENSRNOG00000060769	H2bc1;H2bc12;H2bc9;H2bu1;Hist1h2bc;Hist1h2bd;Hist1h2bg;Hist1h2bl;Hist1h2bo;Hist1h2bq;Hist2h2be;Hist3h2ba;LOC100364835;LOC100365043;LOC100910200;LOC102549061;LOC684797	17
tr|A0A0G2JY69|A0A0G2JY69_RAT;tr|G3V907|G3V907_RAT;sp|Q9QYU1|PEX19_RAT		LOC102548286;Pex19	2
tr|F1LUS1|F1LUS1_RAT;tr|A0A0G2JZV7|A0A0G2JZV7_RAT;tr|F1LYU4|F1LYU4_RAT	ENSRNOG00000047464;ENSRNOG00000049009	AABR07051532.1;AABR07060886.1	2
tr|A0A0G2K0N7|A0A0G2K0N7_RAT	ENSRNOG00000029179	Cyp2d1;Cyp2d3	2
tr|A0A0G2K277|A0A0G2K277_RAT	ENSRNOG00000029549	Eci2;Eci3	2
tr|A0A0G2K290|A0A0G2K290_RAT;tr|A0A0G2K3A6|A0A0G2K3A6_RAT;tr|A0A0G2JUY4|A0A0G2JUY4_RAT;tr|A0A0G2K4A4|A0A0G2K4A4_RAT;tr|M0RBL2|M0RBL2_RAT;tr|A0A0G2JWW4|A0A0G2JWW4_RAT	ENSRNOG00000048458;ENSRNOG00000049243;ENSRNOG00000050912;ENSRNOG00000053312;ENSRNOG00000056043;ENSRNOG00000056760;ENSRNOG00000056828;ENSRNOG00000058352;ENSRNOG00000059121	AABR07065651.4;AABR07065656.3;AABR07065656.4;AABR07065656.8;AABR07065684.1;AABR07065699.4;AABR07065705.1;AABR07065705.3;AABR07065714.1	9
tr|A0A0G2K304|A0A0G2K304_RAT;tr|A0A0G2K7S9|A0A0G2K7S9_RAT	ENSRNOG00000051653;ENSRNOG00000059121	AABR07065714.1;AABR07065772.2	2
tr|A0A0G2K4I8|A0A0G2K4I8_RAT;tr|F1M4R1|F1M4R1_RAT	ENSRNOG00000050944;ENSRNOG00000057681	AABR07065768.1;AABR07065772.4	2
tr|A0A0G2K4S5|A0A0G2K4S5_RAT;tr|D3ZQG9|D3ZQG9_RAT;tr|Q95II0|Q95II0_RAT	ENSRNOG00000000723;ENSRNOG00000039744	RT1-CE4;RT1-CE5	2
tr|A0A0G2K4U2|A0A0G2K4U2_RAT	ENSRNOG00000018937	Gstm2;Gstm7	2
tr|A0A0G2K5A4|A0A0G2K5A4_RAT;tr|D3ZLD5|D3ZLD5_RAT	ENSRNOG00000037437;ENSRNOG00000061046	AABR07059632.3;Golga3	2
tr|A0A0G2K6U2|A0A0G2K6U2_RAT;tr|M0R785|M0R785_RAT;tr|D3ZTR5|D3ZTR5_RAT	ENSRNOG00000000918;ENSRNOG00000053790	AABR07036007.1;Zbed5	2
tr|A0A0G2K719|A0A0G2K719_RAT;tr|D3ZN21|D3ZN21_RAT;tr|D4ADE8|D4ADE8_RAT	ENSRNOG00000002501;ENSRNOG00000023383	Ddx3x;Ddx3y	2
tr|F1LZ00|F1LZ00_RAT;tr|F1M0V4|F1M0V4_RAT;tr|A0A0G2K8V3|A0A0G2K8V3_RAT	ENSRNOG00000007315;ENSRNOG00000042340	LOC679894;Thoc2	2
tr|E9PTK9|E9PTK9_RAT;tr|A0A0G2K916|A0A0G2K916_RAT	ENSRNOG00000030247	Ankhd1;Eif4ebp3	2
tr|M0RBD5|M0RBD5_RAT;tr|A0A0G2K980|A0A0G2K980_RAT;tr|D3ZMY4|D3ZMY4_RAT;tr|F1LWD1|F1LWD1_RAT	ENSRNOG00000029776;ENSRNOG00000037495;ENSRNOG00000055375	AABR07065823.1;AABR07065837.1;AABR07065883.1	3
tr|A0A0G2K9Y0|A0A0G2K9Y0_RAT;tr|F1LPQ6|F1LPQ6_RAT;sp|P20759|IGHG1_RAT;tr|F1LN61|F1LN61_RAT	ENSRNOG00000030332;ENSRNOG00000034190	Ighg1;Ighm	2
tr|A0A0G2K9Y7|A0A0G2K9Y7_RAT;tr|F1LQJ4|F1LQJ4_RAT;tr|A0A0G2JX75|A0A0G2JX75_RAT	ENSRNOG00000015438	Ces1f;LOC501233	2
tr|D4ACC4|D4ACC4_RAT;tr|A0A0G2KAP6|A0A0G2KAP6_RAT;sp|Q63470-2|DYR1A_RAT;sp|Q63470|DYR1A_RAT	ENSRNOG00000001662;ENSRNOG00000019254	Dyrk1a;Dyrk1b	2
tr|A0A140TAI6|A0A140TAI6_RAT;tr|D3ZZ95|D3ZZ95_RAT;tr|M0RCN1|M0RCN1_RAT;tr|D4A1Q0|D4A1Q0_RAT;tr|F1M706|F1M706_RAT;sp|P39032|RL36_RAT	ENSRNOG00000002340;ENSRNOG00000029560;ENSRNOG00000029988;ENSRNOG00000031947;ENSRNOG00000033473	AABR07007675.1;AABR07071986.1;AABR07072272.1;LOC100361079;Rpl36	5
tr|B0BMZ1|B0BMZ1_RAT;tr|M0R549|M0R549_RAT	ENSRNOG00000000551;ENSRNOG00000051000	Fam241b;LOC685881	2
tr|B0BNJ9|B0BNJ9_RAT;tr|M0R701|M0R701_RAT	ENSRNOG00000015437;ENSRNOG00000022144	AABR07072356.1;Tmem14c	2
tr|B0K008|B0K008_RAT;tr|B5DFN1|B5DFN1_RAT	ENSRNOG00000018848;ENSRNOG00000033765	Eif1;Eif1b	2
tr|B1WC16|B1WC16_RAT;tr|A0A0G2K2S3|A0A0G2K2S3_RAT;tr|A0A0G2K1G0|A0A0G2K1G0_RAT	ENSRNOG00000058050	Bclaf1;Mtfr2	2
tr|D3ZU87|D3ZU87_RAT;tr|B2GV65|B2GV65_RAT	ENSRNOG00000001071;ENSRNOG00000017372	AABR07035091.1;Higd2a	2
tr|B2RYT0|B2RYT0_RAT;tr|M0R3S1|M0R3S1_RAT	ENSRNOG00000024845;ENSRNOG00000048409	Mrps21;Mrps21l	2
tr|B2RZD4|B2RZD4_RAT;tr|F1LQ14|F1LQ14_RAT;tr|D4A4W9|D4A4W9_RAT;sp|P11250|RL34_RAT	ENSRNOG00000016387;ENSRNOG00000038045	AC128960.1;Rpl34	2
tr|D3ZSF9|D3ZSF9_RAT;tr|B2RZD5|B2RZD5_RAT	ENSRNOG00000011817;ENSRNOG00000029173	AABR07053716.1;Rpl22l1	2
tr|B5DEL7|B5DEL7_RAT;tr|A0A0G2K7E7|A0A0G2K7E7_RAT	ENSRNOG00000005203;ENSRNOG00000060417	AABR07028668.1;Sec61g	2
tr|B5DEL8|B5DEL8_RAT;tr|A0A0G2JZJ9|A0A0G2JZJ9_RAT	ENSRNOG00000026646;ENSRNOG00000029339;ENSRNOG00000052764	AABR07016779.1;LOC100363268;Ndufs5	3
tr|B5DEP4|B5DEP4_RAT;sp|P0C2B9|RM42_RAT;tr|M0RAG4|M0RAG4_RAT	ENSRNOG00000025964;ENSRNOG00000042740	LOC103691922;Mrpl42	2
tr|B5DEP7|B5DEP7_RAT	ENSRNOG00000016507;ENSRNOG00000032232	LOC687679;Snrpg	2
tr|B5DES0|B5DES0_RAT;tr|M0R8K2|M0R8K2_RAT	ENSRNOG00000015844;ENSRNOG00000048758	Snrpd2;Snrpd2l	2
tr|B5DF24|B5DF24_RAT;sp|Q9QYG8|UCK2_RAT;tr|A0A0G2JX05|A0A0G2JX05_RAT	ENSRNOG00000003917;ENSRNOG00000011467	Uck1;Uck2	2
tr|B5DFK8|B5DFK8_RAT;tr|G3V6B0|G3V6B0_RAT;tr|A0A0G2K7V9|A0A0G2K7V9_RAT;tr|A0A0G2K8S0|A0A0G2K8S0_RAT;tr|F1M024|F1M024_RAT	ENSRNOG00000002407;ENSRNOG00000050441	AABR07028989.1;Pdxdc1	2
tr|D3ZE15|D3ZE15_RAT;tr|F1LZC5|F1LZC5_RAT	ENSRNOG00000020602;ENSRNOG00000021688	AABR07056686.1;Ndufa13	2
tr|D3ZFY8|D3ZFY8_RAT	ENSRNOG00000025580	LOC679539;Ube2v1	2
tr|D3ZG07|D3ZG07_RAT	ENSRNOG00000030374;ENSRNOG00000049370	LOC100360750;Lsm6	2
tr|D3ZGK7|D3ZGK7_RAT	ENSRNOG00000015438	Ces1f;LOC501233	2
tr|D3ZIY7|D3ZIY7_RAT	ENSRNOG00000020641;ENSRNOG00000033244	AABR07069969.1;AC115384.1	2
tr|D3ZJ08|D3ZJ08_RAT		H3c13;Hist2h3c2;LOC102548682;LOC102549173	4
tr|Q642E2|Q642E2_RAT;tr|D3ZJD3|D3ZJD3_RAT;tr|D3ZEI0|D3ZEI0_RAT;sp|P17702|RL28_RAT	ENSRNOG00000009240;ENSRNOG00000017127;ENSRNOG00000037673	AABR07016623.1;AABR07071891.1;Rpl28	3
tr|D3ZLR6|D3ZLR6_RAT		Ugt2b;Ugt2b37	2
tr|D3ZM03|D3ZM03_RAT;tr|M0R3M6|M0R3M6_RAT	ENSRNOG00000048606	LOC103694079;Vma21	2
tr|M0RC60|M0RC60_RAT;tr|D3ZNV6|D3ZNV6_RAT	ENSRNOG00000028176	Elmod2;LOC102554034	2
tr|Q6PDW2|Q6PDW2_RAT;tr|D3ZPN7|D3ZPN7_RAT;tr|M0R5R7|M0R5R7_RAT;tr|D4A870|D4A870_RAT;tr|D3ZPH0|D3ZPH0_RAT;tr|D3ZMI8|D3ZMI8_RAT;tr|D3Z9G3|D3Z9G3_RAT;tr|D3ZZH9|D3ZZH9_RAT;tr|D3ZEK2|D3ZEK2_RAT;sp|P20280|RL21_RAT;tr|D4A7B4|D4A7B4_RAT;tr|F1LWH4|F1LWH4_RAT;tr|D3ZRA9|D3ZRA9_RAT;tr|D3ZLH3|D3ZLH3_RAT;tr|F1LY43|F1LY43_RAT;tr|D4A4G9|D4A4G9_RAT;tr|D3ZPV5|D3ZPV5_RAT;tr|D3ZPU6|D3ZPU6_RAT;tr|D4A219|D4A219_RAT;tr…	ENSRNOG00000000957;ENSRNOG00000029410;ENSRNOG00000029824;ENSRNOG00000030999;ENSRNOG00000031560;ENSRNOG00000032803;ENSRNOG00000033115;ENSRNOG00000033855;ENSRNOG00000036588;ENSRNOG00000038458;ENSRNOG00000045767;ENSRNOG00000045975;ENSRNOG00000046349;ENSRNOG00000047992;ENSRNOG00000048518;ENSRNOG00000048656;ENSRNOG00000048753;ENSRNOG00000049248;ENSRNOG00000049848;ENSRNOG00000050165;ENSRNOG00000050799;…	AABR07007853.1;AABR07007905.1;AABR07008350.1;AABR07012775.1;AABR07013302.1;AABR07013410.1;AABR07026240.1;AABR07028558.1;AABR07030162.1;AABR07034641.1;AABR07037412.1;AABR07062466.1;AABR07067388.1;AABR07067829.1;AABR07068760.1;AABR07069587.1;AABR07070238.2;AC121209.1;AC123185.1;Rpl21	20
tr|D4A040|D4A040_RAT;tr|D4A0K2|D4A0K2_RAT	ENSRNOG00000003080;ENSRNOG00000018531	AABR07021945.1;Mrps11	2
tr|D4A3I4|D4A3I4_RAT;tr|A0A0G2K4W2|A0A0G2K4W2_RAT	ENSRNOG00000008512;ENSRNOG00000024829	AABR07014804.1;Btf3l4	2
tr|D4A4P3|D4A4P3_RAT;tr|M0RA24|M0RA24_RAT	ENSRNOG00000011825;ENSRNOG00000048888	AABR07060996.1;Ndufb3	2
tr|Q5RK17|Q5RK17_RAT;tr|D4A7Z5|D4A7Z5_RAT	ENSRNOG00000008548;ENSRNOG00000029197	Diablo;LOC100360940	2
tr|E9PTW1|E9PTW1_RAT;tr|A0A0G2K5Q8|A0A0G2K5Q8_RAT	ENSRNOG00000020500	Clk2;Scamp3	2
tr|M0R7R1|M0R7R1_RAT;tr|F1LLV6|F1LLV6_RAT	ENSRNOG00000015438	Ces1f;LOC501233	2
tr|F1LM03|F1LM03_RAT;tr|F1M0F9|F1M0F9_RAT;sp|P33273|CP255_RAT	ENSRNOG00000001466;ENSRNOG00000013241	Cyp2c24;LOC100361492	2
tr|F1LTX8|F1LTX8_RAT;tr|Q6TXI6|Q6TXI6_RAT	ENSRNOG00000003883;ENSRNOG00000004402	LOC317456;Lpgat1	2
tr|F1M3E3|F1M3E3_RAT		Ugt2b;Ugt2b37	2
tr|F1M6L8|F1M6L8_RAT;tr|D3ZZW2|D3ZZW2_RAT;tr|D3ZP49|D3ZP49_RAT	ENSRNOG00000021723;ENSRNOG00000043400;ENSRNOG00000047225	AC139642.2;LOC100910678;Tma7	3
tr|F1M7B3|F1M7B3_RAT;tr|M0RDZ5|M0RDZ5_RAT;tr|M0RDL2|M0RDL2_RAT;tr|M0RC23|M0RC23_RAT;tr|D3ZIL8|D3ZIL8_RAT;tr|A0A0G2K3S3|A0A0G2K3S3_RAT	ENSRNOG00000038336;ENSRNOG00000046284;ENSRNOG00000046324;ENSRNOG00000046592;ENSRNOG00000047920;ENSRNOG00000049049;ENSRNOG00000049193;ENSRNOG00000049501;ENSRNOG00000060746	AABR07027451.1;AABR07027458.1;AABR07051726.1;AABR07060994.1;AABR07061003.1;AABR07061044.1;AABR07061048.1;AABR07061057.1;AABR07061078.1	9
tr|F7EPH4|F7EPH4_RAT;tr|A0A0G2JUD2|A0A0G2JUD2_RAT	ENSRNOG00000000557	Ppa1;Sar1a	2
tr|G3V6I9|G3V6I9_RAT;tr|D4A1Z2|D4A1Z2_RAT;sp|P12749|RL26_RAT;tr|D4AE42|D4AE42_RAT	ENSRNOG00000004214;ENSRNOG00000032777;ENSRNOG00000039783	AABR07058519.1;AC094217.1;Rpl26	3
tr|G3V7C6|G3V7C6_RAT;sp|Q6P9T8|TBB4B_RAT;tr|B4F7C2|B4F7C2_RAT	ENSRNOG00000010170;ENSRNOG00000047505	Tubb4a;Tubb4b	2
tr|G3V7F6|G3V7F6_RAT	ENSRNOG00000010732;ENSRNOG00000020771	RGD1561590;Sap18	2
tr|G3V8Z5|G3V8Z5_RAT;tr|M0R4Z4|M0R4Z4_RAT	ENSRNOG00000050898;ENSRNOG00000059447	AABR07034730.2;AC109901.2	2
tr|M0R7P3|M0R7P3_RAT	ENSRNOG00000047150;ENSRNOG00000056194	LOC100912026;LOC100912405	2
tr|M0R9B9|M0R9B9_RAT;tr|D3ZCR9|D3ZCR9_RAT;tr|A0A0G2K3V1|A0A0G2K3V1_RAT	ENSRNOG00000046969	AABR07034438.1;LOC100911374	2
tr|M0R9N6|M0R9N6_RAT;tr|M0RA89|M0RA89_RAT	ENSRNOG00000033220	Oas1b;Oas1f	2
tr|M0RDD7|M0RDD7_RAT;sp|Q498T2-2|CHTOP_RAT;sp|Q498T2|CHTOP_RAT	ENSRNOG00000012760;ENSRNOG00000058457	Chtop;Chtopl1	2
tr|M3ZCQ0|M3ZCQ0_RAT	ENSRNOG00000047986	Sult2a1;Sult2a2	2
tr|O70177|O70177_RAT		Ces2;LOC100365112	2
tr|Q0D2L6|Q0D2L6_RAT;tr|B2RZ38|B2RZ38_RAT	ENSRNOG00000007331;ENSRNOG00000017426	Rragc;Rragd	2
tr|Q3KR55|Q3KR55_RAT;sp|Q7TP17|U2AF4_RAT	ENSRNOG00000024497;ENSRNOG00000045860	U2af1;U2af1l4	2
tr|Q4KLJ0|Q4KLJ0_RAT	ENSRNOG00000051615	Hmgn2;LOC100360316	2
tr|Q5FVQ6|Q5FVQ6_RAT;tr|M0RAS6|M0RAS6_RAT;tr|J7PDL5|J7PDL5_RAT	ENSRNOG00000019542	LOC102555392;MGC108823	2
tr|Q5M878|Q5M878_RAT;tr|Q7TMC3|Q7TMC3_RAT	ENSRNOG00000055531	Hps5;Saa4	2
tr|Q5U3Y8|Q5U3Y8_RAT;tr|M0R5M7|M0R5M7_RAT	ENSRNOG00000016912;ENSRNOG00000031864	AABR07021871.1;Btf3	2
tr|Q5XIW0|Q5XIW0_RAT;sp|O35093|TIM23_RAT	ENSRNOG00000019811	LOC100362432;Timm23	2
tr|Q66HM7|Q66HM7_RAT;sp|P38656|LA_RAT;tr|D3ZLH9|D3ZLH9_RAT	ENSRNOG00000007998;ENSRNOG00000011606	AABR07061825.1;Ssb	2
tr|Q68FX3|Q68FX3_RAT;tr|A0A0G2K7X6|A0A0G2K7X6_RAT;tr|A0A0G2JY21|A0A0G2JY21_RAT;tr|A0A0G2JUH2|A0A0G2JUH2_RAT;tr|A0A0G2JZQ1|A0A0G2JZQ1_RAT	ENSRNOG00000018033	Ddx19a;Ddx19b	2
tr|Q6MGB8|Q6MGB8_RAT;sp|P15978|HA11_RAT	ENSRNOG00000030712	RT1-A2;RT1-EC2	2
tr|Q6PDV8|Q6PDV8_RAT;sp|P47198|RL22_RAT	ENSRNOG00000011104;ENSRNOG00000028747	LOC100360057;Rpl22	2
tr|Q6PDW1|Q6PDW1_RAT;tr|D3ZHB3|D3ZHB3_RAT;sp|P63324|RS12_RAT;tr|D3ZG05|D3ZG05_RAT	ENSRNOG00000016411;ENSRNOG00000020093;ENSRNOG00000046395	AABR07006576.1;LOC100360573;Rps12	3
tr|Q6T5E8|Q6T5E8_RAT;sp|Q64633|UD17_RAT;tr|Q6T5F3|Q6T5F3_RAT;tr|Q6T5E7|Q6T5E7_RAT		Ugt1a7c;Ugt1a8;Ugt1a9	3
tr|Q6T5F0|Q6T5F0_RAT;sp|Q64638|UD15_RAT;tr|Q6T5F2|Q6T5F2_RAT		Ugt1a2;Ugt1a5	2
tr|Q6V9V9|Q6V9V9_RAT;tr|F1LXV3|F1LXV3_RAT	ENSRNOG00000007879;ENSRNOG00000018181	Stk25;Stk26	2
tr|Q6XLI7|Q6XLI7_RAT	ENSRNOG00000019723;ENSRNOG00000050864	Cpne1;Rbm12	2
tr|Q7TP91|Q7TP91_RAT;sp|Q9QXU2|SURF1_RAT	ENSRNOG00000005247;ENSRNOG00000060005	Surf1;Surf4	2
tr|Q7TQ90|Q7TQ90_RAT	ENSRNOG00000046357	Adh4;Adh5	2
tr|Q8CHJ4|Q8CHJ4_RAT;sp|P0C6P6|TYY2_RAT	ENSRNOG00000004339	Yy1;Yy2	2
tr|A0A096MJJ6|A0A096MJJ6_RAT;sp|A0FKI7-2|ACBD5_RAT;sp|A0FKI7|ACBD5_RAT;sp|A0FKI7-3|ACBD5_RAT;tr|M0R9S4|M0R9S4_RAT;tr|A0A0G2K3Z5|A0A0G2K3Z5_RAT	ENSRNOG00000017642;ENSRNOG00000046845	AABR07028887.1;Acbd5	2
sp|B2GUV7|IF2P_RAT;tr|M0R7Z0|M0R7Z0_RAT;tr|A0A0H2UHV4|A0A0H2UHV4_RAT	ENSRNOG00000023356;ENSRNOG00000046621	AABR07043748.1;Eif5b	2
sp|B2RYG1|FA32A_RAT;tr|D3ZUE5|D3ZUE5_RAT	ENSRNOG00000015168;ENSRNOG00000039528	Fam32a;LOC365238	2
tr|M0R5F8|M0R5F8_RAT;sp|B4F777|HMGN5_RAT	ENSRNOG00000029078;ENSRNOG00000049192	Hmgn5;Hmgn5b	2
sp|D4A1R8|CPNE1_RAT	ENSRNOG00000019723;ENSRNOG00000050864	Cpne1;Rbm12	2
sp|M0RC99|RAB5A_RAT	ENSRNOG00000057056	Rab5a;Rab5al1	2
tr|A0A0G2JX32|A0A0G2JX32_RAT;tr|F1LPP0|F1LPP0_RAT;sp|O08838|AMPH_RAT;tr|A0A0G2K5Z4|A0A0G2K5Z4_RAT	ENSRNOG00000012490	AABR07027870.1;Amph	2
tr|M0R8T0|M0R8T0_RAT;tr|G3V7H2|G3V7H2_RAT;sp|O35217|MINP1_RAT	ENSRNOG00000011287;ENSRNOG00000048095	Minpp1;RGD1564801	2
sp|O35793|GREM1_RAT;tr|D3ZXD0|D3ZXD0_RAT	ENSRNOG00000003616;ENSRNOG00000026053	Grem1;Grem2	2
tr|G3V6J5|G3V6J5_RAT;sp|O35831|CDK17_RAT;tr|A0A140UHY2|A0A140UHY2_RAT;tr|Q68G39|Q68G39_RAT	ENSRNOG00000004148;ENSRNOG00000008578	Cdk16;Cdk17	2
sp|O70377|SNP23_RAT;tr|M0R4V3|M0R4V3_RAT	ENSRNOG00000050552	AABR07053516.1;Snap23	2
sp|O70631|EST2C_RAT;tr|A0A0G2K0C1|A0A0G2K0C1_RAT	ENSRNOG00000036571	Ces2;Ces2c;LOC100365112	3
sp|O88994|MARC2_RAT;tr|D3Z900|D3Z900_RAT;tr|M0R6N2|M0R6N2_RAT	ENSRNOG00000037850	LOC100910481;Mtarc2	2
sp|P01946|HBA_RAT	ENSRNOG00000029886;ENSRNOG00000047321	Hba-a1;Hba-a2	2
sp|P02761|MUP_RAT;tr|F7FIH7|F7FIH7_RAT;tr|F7ET54|F7ET54_RAT;tr|A0A096MK41|A0A096MK41_RAT;tr|M0RBS2|M0RBS2_RAT;tr|F8WFF8|F8WFF8_RAT		LOC259244;LOC259246;LOC500473;Mup4;RGD1566134	5
sp|P02803|MT1_RAT;tr|A0A0H2UHT7|A0A0H2UHT7_RAT	ENSRNOG00000025764;ENSRNOG00000038047	AC128848.1;Mt1	2
tr|A0A0H2UHQ8|A0A0H2UHQ8_RAT;tr|D3ZFA8|D3ZFA8_RAT;sp|P04644|RS17_RAT;tr|D3ZHU9|D3ZHU9_RAT;tr|D3ZKG6|D3ZKG6_RAT	ENSRNOG00000019106;ENSRNOG00000032765;ENSRNOG00000045885;ENSRNOG00000048927	AABR07018533.1;AABR07068536.1;LOC100365810;Rps17	4
tr|D3ZZN4|D3ZZN4_RAT;sp|P04646|RL35A_RAT;tr|D4A771|D4A771_RAT;tr|F1M0T2|F1M0T2_RAT;tr|A0A096P6M4|A0A096P6M4_RAT	ENSRNOG00000030217;ENSRNOG00000031694;ENSRNOG00000032303;ENSRNOG00000033058;ENSRNOG00000033625;ENSRNOG00000047557;ENSRNOG00000049536	AABR07027015.1;AABR07030122.1;AABR07053188.1;AABR07064810.1;LOC103690996;LOC108349682;Rpl35al1	7
tr|M0R5J4|M0R5J4_RAT;sp|P04764|ENOA_RAT	ENSRNOG00000017895;ENSRNOG00000028543	AABR07052523.1;Eno1	2
sp|P04797|G3P_RAT;tr|M0R590|M0R590_RAT;tr|D3ZGY4|D3ZGY4_RAT;tr|M0R660|M0R660_RAT	ENSRNOG00000018630;ENSRNOG00000033057;ENSRNOG00000050630	AABR07025010.1;AABR07070043.1;Gapdh;LOC108351137	4
sp|P05065|ALDOA_RAT;tr|Q6AY07|Q6AY07_RAT	ENSRNOG00000030869;ENSRNOG00000052802	Aldoa;Aldoart2	2
tr|A0A0G2JXC3|A0A0G2JXC3_RAT;sp|P05765|RS21_RAT;tr|D3ZSE0|D3ZSE0_RAT	ENSRNOG00000033916;ENSRNOG00000060449	AC141489.1;Rps21	2
sp|P06302|PTMA_RAT	ENSRNOG00000018584;ENSRNOG00000025731	LOC100359583;Ptma	2
sp|P06757|ADH1_RAT;tr|A0A0G2JW98|A0A0G2JW98_RAT	ENSRNOG00000012436	Adh1;Adh6	2
tr|A0A0G2JV52|A0A0G2JV52_RAT;tr|F1LNM4|F1LNM4_RAT;tr|M0RB00|M0RB00_RAT;tr|A0A0G2JW12|A0A0G2JW12_RAT;sp|P08649|CO4_RAT;tr|Q6MG90|Q6MG90_RAT	ENSRNOG00000030729;ENSRNOG00000047657	C4a;C4b	2
sp|P09895|RL5_RAT;tr|D3ZHP8|D3ZHP8_RAT	ENSRNOG00000023529;ENSRNOG00000037220	AABR07031089.1;Rpl5	2
tr|A0A0A0MXW3|A0A0A0MXW3_RAT;tr|D4AEC0|D4AEC0_RAT;sp|P0C0S7|H2AZ_RAT	ENSRNOG00000010306;ENSRNOG00000052275	H2az1;H2az2	2
sp|P0C170|H2A1E_RAT;sp|P0C169|H2A1C_RAT;sp|A9UMV8|H2AJ_RAT;tr|G3V9C0|G3V9C0_RAT;tr|D3ZVK7|D3ZVK7_RAT;sp|Q4FZT6|H2A3_RAT;tr|M0RDM4|M0RDM4_RAT;tr|Q6I8Q6|Q6I8Q6_RAT;sp|Q64598|H2A1F_RAT;tr|M0RCL5|M0RCL5_RAT;sp|Q00728|H2A4_RAT		H2ac1;H2ac4;H2aj;Hist1h2ac;Hist1h2af;Hist1h2ah;Hist1h2ai;hist1h2ail2;Hist1h2an;Hist3h2a;LOC100910554;LOC103690190;LOC684773	13
tr|F1LSW6|F1LSW6_RAT;sp|P0C644|VIP1_RAT;tr|A0A0G2K4M9|A0A0G2K4M9_RAT	ENSRNOG00000014436	Mfap1a;Ppip5k1	2
sp|P0CC09|H2A2A_RAT;tr|D4ACV3|D4ACV3_RAT	ENSRNOG00000047898;ENSRNOG00000052555	Hist2h2aa2;Hist2h2aa3	2
sp|P0DMW1|HS71B_RAT;sp|P0DMW0|HS71A_RAT		Hspa1a;Hspa1b	2
sp|P0DP31|CALM3_RAT;sp|P0DP30|CALM2_RAT;sp|P0DP29|CALM1_RAT;sp|Q5U206|CALL3_RAT	ENSRNOG00000004060;ENSRNOG00000016770;ENSRNOG00000030871;ENSRNOG00000031955	Calm1;Calm2;Calm3;Calml3	4
sp|P10111|PPIA_RAT;tr|A0A0G2K1P0|A0A0G2K1P0_RAT;tr|A0A0G2K2E4|A0A0G2K2E4_RAT	ENSRNOG00000027864;ENSRNOG00000031045;ENSRNOG00000055068	LOC100911252;Ppia;Ppial4d	3
sp|P11517|HBB2_RAT	ENSRNOG00000047098;ENSRNOG00000061299	Hbb-bs;LOC100134871	2
sp|P12711|ADHX_RAT;tr|Q7TQ90|Q7TQ90_RAT	ENSRNOG00000046357	Adh4;Adh5	2
sp|P13471|RS14_RAT;tr|Q6PDV6|Q6PDV6_RAT	ENSRNOG00000018774	LOC100911847;Rps14	2
sp|P15337-1|CREB1_RAT;sp|P15337|CREB1_RAT;tr|F7FD47|F7FD47_RAT	ENSRNOG00000013412;ENSRNOG00000061088	Atf1;Creb1	2
tr|D4A6G6|D4A6G6_RAT;sp|P17074|RS19_RAT;tr|A0A0H2UI38|A0A0H2UI38_RAT;tr|F1M8C7|F1M8C7_RAT;tr|F1M764|F1M764_RAT;tr|D3ZGN8|D3ZGN8_RAT;tr|F1LYF3|F1LYF3_RAT	ENSRNOG00000005430;ENSRNOG00000013292;ENSRNOG00000037897	AABR07040944.1;AC117101.1;Rps19;Rps19l2	4
sp|P17077|RL9_RAT;tr|A0A0G2JXD0|A0A0G2JXD0_RAT;tr|M0R6B4|M0R6B4_RAT	ENSRNOG00000026716;ENSRNOG00000028449;ENSRNOG00000030476;ENSRNOG00000055770;ENSRNOG00000058695;ENSRNOG00000061320	AABR07050391.2;AABR07050399.1;LOC100360449;LOC100364457;LOC103692829;Rpl9	6
sp|P17078|RL35_RAT;tr|D3ZN79|D3ZN79_RAT;tr|F1M6G3|F1M6G3_RAT	ENSRNOG00000003158;ENSRNOG00000014272;ENSRNOG00000030364	AABR07031666.1;AABR07037343.1;Rpl35	3
sp|P63164|RSMN_RAT;sp|P17136|RSMB_RAT;tr|Q5XII7|Q5XII7_RAT	ENSRNOG00000006961;ENSRNOG00000059764	Snrpb;Snrpn	2
sp|P18395|CSDE1_RAT	ENSRNOG00000046533;ENSRNOG00000061058	Csde1;LOC100364335	2
sp|P18422|PSA3_RAT	ENSRNOG00000007851	Psma3;Psma3l	2
tr|A0A0G2K7W6|A0A0G2K7W6_RAT;sp|P18445|RL27A_RAT;tr|D3ZI60|D3ZI60_RAT;tr|D4AAY6|D4AAY6_RAT;tr|D3ZG03|D3ZG03_RAT	ENSRNOG00000014214;ENSRNOG00000031273;ENSRNOG00000031736;ENSRNOG00000033274	AABR07034639.1;AC113910.1;LOC108351703;Rpl27a	4
sp|P19944|RLA1_RAT	ENSRNOG00000013874	LOC100360522;Rplp1	2
sp|P21533|RL6_RAT;tr|F1LQS3|F1LQS3_RAT;tr|A0A0G2KBA1|A0A0G2KBA1_RAT	ENSRNOG00000025936;ENSRNOG00000055942	AC120310.1;Rpl6	2
sp|P23358|RL12_RAT;tr|A0A140TAC5|A0A140TAC5_RAT;tr|M0R4B6|M0R4B6_RAT;tr|D3ZJE2|D3ZJE2_RAT		LOC102555453;Rpl12	2
sp|P24049|RL17_RAT;tr|A0A0H2UHQ1|A0A0H2UHQ1_RAT;tr|F1LZX7|F1LZX7_RAT;tr|A0A0G2KB77|A0A0G2KB77_RAT;tr|D3Z9G9|D3Z9G9_RAT	ENSRNOG00000018680;ENSRNOG00000022022;ENSRNOG00000029262	AABR07053166.1;AC128967.1;Rpl17	3
sp|P24090|FETUA_RAT;tr|F1LM19|F1LM19_RAT;tr|Q7TP75|Q7TP75_RAT	ENSRNOG00000038370	AABR07034632.1;Ahsg	2
tr|F1LYI5|F1LYI5_RAT;tr|A0A0G2QC62|A0A0G2QC62_RAT;sp|P25886|RL29_RAT;tr|M0R665|M0R665_RAT;tr|D4A883|D4A883_RAT	ENSRNOG00000011138;ENSRNOG00000021843;ENSRNOG00000029594;ENSRNOG00000037172;ENSRNOG00000057505	AABR07015015.2;AABR07064000.1;AABR07072463.1;AC132539.2;Rpl29	5
tr|A0A0U1RVI9|A0A0U1RVI9_RAT;sp|P27952|RS2_RAT;tr|E9PT76|E9PT76_RAT;tr|A0A0G2KB28|A0A0G2KB28_RAT;tr|D3ZIY7|D3ZIY7_RAT	ENSRNOG00000014179;ENSRNOG00000020641;ENSRNOG00000022934;ENSRNOG00000030174;ENSRNOG00000033244	AABR07042903.1;AABR07066818.1;AABR07069969.1;AC115384.1;Rps2	5
tr|A0A0G2JSL0|A0A0G2JSL0_RAT;sp|P28073|PSB6_RAT	ENSRNOG00000011827;ENSRNOG00000019551	LOC100360846;Psmb6	2
sp|P29314|RS9_RAT;tr|D3ZV50|D3ZV50_RAT;tr|A0A0G2K4C4|A0A0G2K4C4_RAT	ENSRNOG00000039203;ENSRNOG00000058909	AABR07040892.1;Rps9;Rps9l1	3
sp|P29418|ATP5E_RAT;tr|M0R601|M0R601_RAT	ENSRNOG00000045749;ENSRNOG00000049912	AC105515.1;Atp5f1e	2
sp|P30713|GSTT2_RAT;tr|A0A0G2K3C6|A0A0G2K3C6_RAT	ENSRNOG00000052415	Gstt2;LOC103694879	2
sp|P30904|MIF_RAT;tr|D3ZE63|D3ZE63_RAT		AC127887.1;Mif	2
sp|P35171|CX7A2_RAT	ENSRNOG00000042903	Cox7a2;Cox7a2l2	2
sp|P35435|ATPG_RAT;tr|Q6PCU0|Q6PCU0_RAT;tr|Q6QI09|Q6QI09_RAT	ENSRNOG00000019223	Atp5f1c;Taf3	2
sp|P36201|CRIP2_RAT;tr|D4ACX1|D4ACX1_RAT	ENSRNOG00000002975;ENSRNOG00000005041	AABR07037243.1;Crip2	2
sp|P39069|KAD1_RAT;tr|A0A0G2K7Q6|A0A0G2K7Q6_RAT	ENSRNOG00000049056	AABR07051450.1;Ak1	2
tr|D3ZRM9|D3ZRM9_RAT;sp|P41123|RL13_RAT;tr|F1M2E9|F1M2E9_RAT;tr|A0A0G2JYG9|A0A0G2JYG9_RAT;tr|D3ZD02|D3ZD02_RAT	ENSRNOG00000015335;ENSRNOG00000029227;ENSRNOG00000059545	AABR07054469.1;AC114446.1;Rpl13	3
sp|P47727|CBR1_RAT;tr|M0R3X6|M0R3X6_RAT;tr|A0A0G2JSV2|A0A0G2JSV2_RAT;tr|A0A0G2K658|A0A0G2K658_RAT	ENSRNOG00000049693;ENSRNOG00000049911	Cbr1;LOC102556347	2
tr|F1LM78|F1LM78_RAT;sp|P50170|RDH16_RAT;tr|F7FHR5|F7FHR5_RAT;tr|A0A0G2K7A4|A0A0G2K7A4_RAT;sp|P55006|RDH7_RAT	ENSRNOG00000029651	Rdh16;Rdh7	2
sp|P50408|VATF_RAT;tr|B2GUW7|B2GUW7_RAT	ENSRNOG00000007392;ENSRNOG00000051860	Atp6v1f;Rnase4	2
sp|P51583|PUR6_RAT;tr|F8WFR8|F8WFR8_RAT;tr|A0A0G2K5S4|A0A0G2K5S4_RAT	ENSRNOG00000002101;ENSRNOG00000056398	AABR07036855.1;Paics	2
sp|P52925|HMGB2_RAT;tr|D3ZS25|D3ZS25_RAT;tr|D3ZN59|D3ZN59_RAT	ENSRNOG00000013167;ENSRNOG00000026462;ENSRNOG00000029107;ENSRNOG00000033321	AABR07015743.1;Hmgb2;Hmgb2l1;RGD1559962	4
tr|E9PU78|E9PU78_RAT;sp|P53563-2|B2CL1_RAT;tr|A0A0G2JZS5|A0A0G2JZS5_RAT;sp|P53563-3|B2CL1_RAT;sp|P53563|B2CL1_RAT;tr|Q7TS62|Q7TS62_RAT	ENSRNOG00000007946;ENSRNOG00000018503	AC098008.1;Bcl2l1	2
sp|P55770|NH2L1_RAT	ENSRNOG00000006762;ENSRNOG00000025154	LOC100359574;Snu13	2
sp|P60522|GBRL2_RAT;tr|F1M1J6|F1M1J6_RAT	ENSRNOG00000019425;ENSRNOG00000027547	AABR07048308.1;Gabarapl2;LOC100359937	3
tr|A0A0H2UHG7|A0A0H2UHG7_RAT;tr|D3ZZK1|D3ZZK1_RAT;tr|A0A0G2K6L6|A0A0G2K6L6_RAT;sp|P60868|RS20_RAT;tr|M0RB28|M0RB28_RAT;tr|M0R5V6|M0R5V6_RAT;tr|M0R566|M0R566_RAT;tr|M0R987|M0R987_RAT	ENSRNOG00000008555;ENSRNOG00000029341;ENSRNOG00000029627;ENSRNOG00000029843;ENSRNOG00000030345;ENSRNOG00000030426;ENSRNOG00000030596;ENSRNOG00000031205;ENSRNOG00000048426;ENSRNOG00000056863;ENSRNOG00000059138	AABR07036375.1;AABR07044509.1;AABR07050116.1;AABR07070957.1;AC121204.2;AC136584.1;LOC100359951;LOC100362149;LOC100362684;LOC100364116;Rps20	11
sp|P60892|PRPS1_RAT	ENSRNOG00000056011;ENSRNOG00000060262	LOC314140;Prps1	2
tr|A0A0G2JV81|A0A0G2JV81_RAT;sp|P84079|ARF1_RAT;sp|P61206|ARF3_RAT;tr|A0A0G2K9H8|A0A0G2K9H8_RAT;tr|A0A0G2K4Q4|A0A0G2K4Q4_RAT	ENSRNOG00000054775;ENSRNOG00000057515;ENSRNOG00000060229	AABR07046136.1;Arf1;Arf3;Fkbp11	4
sp|P61354|RL27_RAT;tr|D3ZTK5|D3ZTK5_RAT;tr|M0R7P0|M0R7P0_RAT	ENSRNOG00000020674;ENSRNOG00000033603;ENSRNOG00000053282;ENSRNOG00000060888	AABR07034315.1;AABR07070594.1;AABR07070689.2;Rpl27	4
tr|A0A0H2UHU1|A0A0H2UHU1_RAT;sp|P61515|RL37P_RAT;sp|D4AAZ6|RL37A_RAT;tr|D4A7B1|D4A7B1_RAT	ENSRNOG00000028883	AABR07072078.1;Rpl37a	2
sp|P61959|SUMO2_RAT;tr|F1M2K3|F1M2K3_RAT;tr|D4A7L5|D4A7L5_RAT	ENSRNOG00000003670;ENSRNOG00000039674	AABR07034657.1;Sumo2	2
sp|P62024|PHAR1_RAT;tr|F1LNB2|F1LNB2_RAT	ENSRNOG00000014264	AABR07027306.1;Phactr1	2
sp|P62083|RS7_RAT	ENSRNOG00000008551;ENSRNOG00000027694	LOC100362830;Rps7	2
sp|P62243|RS8_RAT;tr|M0R7Q5|M0R7Q5_RAT;tr|Q6TXJ0|Q6TXJ0_RAT;tr|D3ZIE1|D3ZIE1_RAT	ENSRNOG00000007238;ENSRNOG00000054626	LOC297756;Rps8	2
tr|D3ZLL8|D3ZLL8_RAT;sp|P62246|RS15A_RAT;tr|A0A0G2K6I0|A0A0G2K6I0_RAT;tr|D3ZZC7|D3ZZC7_RAT;tr|D3ZS61|D3ZS61_RAT	ENSRNOG00000018320;ENSRNOG00000030447;ENSRNOG00000032877	AABR07072261.1;AC105662.1;Rps15a	3
sp|P62268|RS23_RAT;tr|D4A9Q3|D4A9Q3_RAT;tr|F1LTW8|F1LTW8_RAT	ENSRNOG00000016580;ENSRNOG00000029461;ENSRNOG00000034052	AABR07071482.2;AABR07072400.1;Rps23	3
tr|A0A0H2UHT6|A0A0H2UHT6_RAT;tr|D3ZM33|D3ZM33_RAT;sp|P62271|RS18_RAT;tr|M0R5K9|M0R5K9_RAT;tr|A0A0G2KA79|A0A0G2KA79_RAT;tr|D3ZAU6|D3ZAU6_RAT	ENSRNOG00000014169;ENSRNOG00000028505;ENSRNOG00000030107;ENSRNOG00000032944;ENSRNOG00000033152;ENSRNOG00000033451	AABR07042892.1;AABR07049320.1;AABR07049329.1;AABR07057460.1;Rps18;Rps18l1	6
sp|P62275|RS29_RAT	ENSRNOG00000004196;ENSRNOG00000028939	LOC108350501;LOC108351482;LOC108352650;Rps29	4
sp|P62278|RS13_RAT;tr|M0RCY2|M0RCY2_RAT	ENSRNOG00000028021;ENSRNOG00000048698	AABR07048031.1;LOC684988;Rps13	3
tr|F1M013|F1M013_RAT;tr|D3ZU22|D3ZU22_RAT;sp|P62425|RL7A_RAT;tr|D3ZPL5|D3ZPL5_RAT;tr|M0R3M3|M0R3M3_RAT;tr|D4A6B9|D4A6B9_RAT;tr|D3ZJH5|D3ZJH5_RAT	ENSRNOG00000028826;ENSRNOG00000029423;ENSRNOG00000031902;ENSRNOG00000033843;ENSRNOG00000047737;ENSRNOG00000049097	AABR07007121.1;AABR07027819.1;AABR07052519.1;AC128901.1;Rpl7a	5
sp|P62630|EF1A1_RAT;tr|M0R757|M0R757_RAT;tr|F1M6C2|F1M6C2_RAT	ENSRNOG00000009439;ENSRNOG00000029996	AABR07054368.1;Eef1a1	2
tr|X1WI37|X1WI37_RAT;sp|P62703|RS4X_RAT;tr|A0A0H2UHX3|A0A0H2UHX3_RAT;tr|D3ZX01|D3ZX01_RAT	ENSRNOG00000003201;ENSRNOG00000031041	Rps4x;Rps4y2	2
sp|P62738|ACTA_RAT;tr|A0A0G2K4M6|A0A0G2K4M6_RAT;sp|P63269|ACTH_RAT	ENSRNOG00000029401;ENSRNOG00000058039	Acta2;Actg2	2
tr|F1LT35|F1LT35_RAT;tr|D3ZTH8|D3ZTH8_RAT;sp|P62752|RL23A_RAT;tr|D3ZNM1|D3ZNM1_RAT;tr|D4AAL7|D4AAL7_RAT	ENSRNOG00000023344;ENSRNOG00000028963;ENSRNOG00000029859	AABR07015476.1;AABR07021384.1;Rpl23a	3
sp|P62804|H4_RAT		Hist1h2ao;Hist1h4b;Hist1h4m;Hist2h4	4
sp|P62828|RAN_RAT;sp|Q8K586|RANT_RAT	ENSRNOG00000000938;ENSRNOG00000032913	Ran;Rasl2-9	2
sp|P62845|RS15_RAT;tr|D3ZAK6|D3ZAK6_RAT	ENSRNOG00000024603;ENSRNOG00000043026	AC128207.2;Rps15	2
tr|A0A0H2UHU0|A0A0H2UHU0_RAT;sp|P62853|RS25_RAT;tr|F1M6F4|F1M6F4_RAT;tr|M0R763|M0R763_RAT	ENSRNOG00000027503;ENSRNOG00000031703;ENSRNOG00000047151;ENSRNOG00000055406	AABR07050701.1;AABR07061383.1;AABR07071294.1;AABR07073045.1;Rps25	5
tr|D3Z8D7|D3Z8D7_RAT;tr|A0A0G2K743|A0A0G2K743_RAT;sp|P62856|RS26_RAT;tr|D3ZJ54|D3ZJ54_RAT;tr|A0A0G2JY64|A0A0G2JY64_RAT	ENSRNOG00000029512;ENSRNOG00000056532	AC126292.3;LOC100360508;LOC100361854;Rps26	4
sp|P62864|RS30_RAT;tr|Q5BJN7|Q5BJN7_RAT		Fau;LOC687780	2
tr|A0A140TA99|A0A140TA99_RAT;sp|P62870|ELOB_RAT;tr|F1M937|F1M937_RAT	ENSRNOG00000004814;ENSRNOG00000033199	AABR07068955.1;Elob	2
sp|P62890|RL30_RAT;tr|A0A0G2K5E6|A0A0G2K5E6_RAT	ENSRNOG00000005975;ENSRNOG00000021406;ENSRNOG00000032825	LOC100362027;LOC108351936;Rpl30	3
tr|D4A5L9|D4A5L9_RAT;sp|P62898|CYC_RAT	ENSRNOG00000010452;ENSRNOG00000032885;ENSRNOG00000033559	AC128290.1;Cycs;LOC100363502	3
tr|D3ZX87|D3ZX87_RAT;sp|P62902|RL31_RAT;tr|D3ZKU5|D3ZKU5_RAT;tr|A0A0G2K7E3|A0A0G2K7E3_RAT;tr|D4ABZ9|D4ABZ9_RAT;tr|D3ZK34|D3ZK34_RAT;tr|D3Z8W1|D3Z8W1_RAT;tr|D3ZU04|D3ZU04_RAT;tr|D4ACQ2|D4ACQ2_RAT;tr|D3ZZ60|D3ZZ60_RAT;tr|D3ZVF5|D3ZVF5_RAT	ENSRNOG00000013508;ENSRNOG00000029278;ENSRNOG00000029926;ENSRNOG00000030278;ENSRNOG00000030296;ENSRNOG00000031313;ENSRNOG00000033024;ENSRNOG00000039487;ENSRNOG00000050226;ENSRNOG00000050666	AABR07017576.1;AABR07021008.1;AABR07031947.1;AABR07032277.1;AABR07056668.1;AABR07059675.1;AABR07071195.1;AC099453.1;AC103024.1;Rpl31	10
sp|P62909|RS3_RAT;tr|D3ZVH2|D3ZVH2_RAT	ENSRNOG00000007605;ENSRNOG00000017418	AABR07052430.1;Rps3	2
tr|D4A412|D4A412_RAT;sp|P62912|RL32_RAT	ENSRNOG00000008516;ENSRNOG00000010746	AABR07049516.1;Rpl32	2
sp|P62919|RL8_RAT;tr|D4A6W6|D4A6W6_RAT		AC129049.1;LOC100360117;Rpl8	3
sp|P62959|HINT1_RAT;tr|D4A269|D4A269_RAT	ENSRNOG00000000622;ENSRNOG00000005630	AABR07060778.1;Hint1	2
sp|P62982|RS27A_RAT;sp|P62986|RL40_RAT;sp|P0CG51|UBB_RAT;tr|F1LML2|F1LML2_RAT;sp|Q63429|UBC_RAT;tr|F1LU69|F1LU69_RAT	ENSRNOG00000004426;ENSRNOG00000019974;ENSRNOG00000057823	Rps27a;Uba52;Ubc	3
sp|P63018|HSP7C_RAT;tr|D4A4S3|D4A4S3_RAT;tr|M0RCB1|M0RCB1_RAT;tr|F1LZI1|F1LZI1_RAT;tr|M0R8M9|M0R8M9_RAT;tr|A0A0G2JVI3|A0A0G2JVI3_RAT	ENSRNOG00000032585;ENSRNOG00000034066;ENSRNOG00000034093;ENSRNOG00000061099	AABR07011951.1;AABR07033324.1;AABR07048992.1;Hspa8	4
tr|A0A0H2UHV6|A0A0H2UHV6_RAT;sp|P63100|CANB1_RAT;sp|P63100-2|CANB1_RAT;tr|A0A0G2K4H3|A0A0G2K4H3_RAT	ENSRNOG00000043210;ENSRNOG00000057321	AABR07016428.1;Ppp3r1	2
sp|P63159|HMGB1_RAT;tr|D3ZCR3|D3ZCR3_RAT;tr|A0A0G2K6P4|A0A0G2K6P4_RAT;tr|D3ZXR5|D3ZXR5_RAT	ENSRNOG00000034130;ENSRNOG00000051482;ENSRNOG00000058908	Hmg1l1;Hmgb1;LOC108349189	3
sp|P63170|DYL1_RAT;tr|A0A0G2JU43|A0A0G2JU43_RAT	ENSRNOG00000011222;ENSRNOG00000052174	Dynll1;LOC100361920	2
sp|P63174|RL38_RAT;tr|D4AD70|D4AD70_RAT;tr|D3ZZH2|D3ZZH2_RAT;tr|D3ZW57|D3ZW57_RAT	ENSRNOG00000030747;ENSRNOG00000031434;ENSRNOG00000032847;ENSRNOG00000033484;ENSRNOG00000048701	AABR07039377.1;AABR07060145.1;AC098064.1;LOC685963;LOC690468;Rpl38	6
tr|F2Z3T8|F2Z3T8_RAT;sp|P63219|GBG5_RAT	ENSRNOG00000015936;ENSRNOG00000038205;ENSRNOG00000039562	AABR07033987.1;Gng5;LOC108349548	3
sp|P63259|ACTG_RAT	ENSRNOG00000036701;ENSRNOG00000053452	Actg1;LOC100361457	2
sp|P63312|TYB10_RAT		LOC100364435;Tmsb10	2
tr|F1LT36|F1LT36_RAT;sp|P63326|RS10_RAT;tr|A0A0H2UI18|A0A0H2UI18_RAT;tr|D3ZJY5|D3ZJY5_RAT;tr|D3ZH53|D3ZH53_RAT		AABR07017250.1;AABR07057264.1;Rps10;Rps10l1	4
sp|P68370|TBA1A_RAT;sp|Q68FR8|TBA3_RAT	ENSRNOG00000031707;ENSRNOG00000032967;ENSRNOG00000060728	Tuba1a;Tuba3a;Tuba3b	3
sp|P83883|RL36A_RAT	ENSRNOG00000011494;ENSRNOG00000031022	Rpl36a;Rpl36al	2
sp|P83941|ELOC_RAT;tr|A0A0G2K2A0|A0A0G2K2A0_RAT;tr|A0A096MIY6|A0A096MIY6_RAT	ENSRNOG00000031730;ENSRNOG00000051063;ENSRNOG00000061371	AABR07035541.3;AABR07044940.1;Eloc	3
tr|Q56R20|Q56R20_RAT;sp|P83953|IMA5_RAT;tr|A0A0H2UHW5|A0A0H2UHW5_RAT;sp|Q56R16|IMA6_RAT	ENSRNOG00000030109;ENSRNOG00000051711	Kpna1;Kpna5	2
tr|D3ZK97|D3ZK97_RAT;sp|P84245|H33_RAT;tr|M0RBX6|M0RBX6_RAT;sp|Q6LED0|H31_RAT;tr|A0A0G2K0N8|A0A0G2K0N8_RAT		AABR07027811.2;AC119603.1;H3c1;H3f3a;H3f3b;H3f3c;Hist1h2ail1;Hist1h3b	8
sp|P97612|FAAH1_RAT	ENSRNOG00000011019;ENSRNOG00000045949	Faah;Faahl	2
sp|Q06486-2|KC1D_RAT;sp|Q06486|KC1D_RAT;tr|Q9JJ75|Q9JJ75_RAT	ENSRNOG00000013076;ENSRNOG00000036676	Csnk1d;Csnk1e	2
sp|Q07969|CD36_RAT;tr|Q6IMX5|Q6IMX5_RAT;tr|A0A0G2JYC5|A0A0G2JYC5_RAT;tr|A0A096MJ39|A0A096MJ39_RAT;tr|A0A096MJJ0|A0A096MJJ0_RAT;tr|F7F5B5|F7F5B5_RAT;tr|D4A8Z2|D4A8Z2_RAT	ENSRNOG00000043176	AABR07059308.1;Cd36	2
tr|A0A0G2JSZ4|A0A0G2JSZ4_RAT;sp|Q2MJT0|MEF2A_RAT;tr|A0A0G2JTF4|A0A0G2JTF4_RAT;tr|A0A0G2JT35|A0A0G2JT35_RAT;tr|A0A096MJ09|A0A096MJ09_RAT;tr|A0A096MK43|A0A096MK43_RAT;tr|A0A096MJD9|A0A096MJD9_RAT;tr|M0R6R7|M0R6R7_RAT	ENSRNOG00000033134;ENSRNOG00000047756	Mef2a;Mef2c	2
sp|Q3B8N7|T22D4_RAT;tr|A0A0G2K1V1|A0A0G2K1V1_RAT	ENSRNOG00000024616;ENSRNOG00000050805	C12H7orf61;Tsc22d4	2
sp|Q3B8Q0|MARE2_RAT;tr|M0R8A4|M0R8A4_RAT;tr|M0R7M8|M0R7M8_RAT	ENSRNOG00000047261;ENSRNOG00000049681	AABR07031445.1;AABR07031491.2;Mapre2	3
sp|Q3T1J1|IF5A1_RAT;tr|G3V7J7|G3V7J7_RAT	ENSRNOG00000011859;ENSRNOG00000016478	Eif5a;Eif5a2	2
tr|D4A1V7|D4A1V7_RAT;sp|Q3T1J9|MOB1A_RAT	ENSRNOG00000010996;ENSRNOG00000059474	Mob1a;Mob1b	2
sp|Q4AEF8|COPG1_RAT;tr|A0A0G2K1F3|A0A0G2K1F3_RAT	ENSRNOG00000010474	Copg1;Hmces	2
sp|Q4KLL0|TCEA1_RAT	ENSRNOG00000022323	LOC498453;Tcea1	2
sp|Q4KLP0|DHTK1_RAT;tr|A0A0U1RRZ4|A0A0U1RRZ4_RAT	ENSRNOG00000023587;ENSRNOG00000062048	AC141220.4;Dhtkd1	2
sp|Q4QQW4|HDAC1_RAT;tr|D3ZVU7|D3ZVU7_RAT	ENSRNOG00000009568;ENSRNOG00000013695	Hdac1;Hdac1l	2
sp|Q4V8J7|SPIN1_RAT;tr|M0RA15|M0RA15_RAT	ENSRNOG00000011119;ENSRNOG00000046068	AABR07027088.1;Spin1	2
sp|Q505I4|CO040_RAT	ENSRNOG00000052273	LOC100363116;RGD1305713	2
sp|Q561S0|NDUAA_RAT	ENSRNOG00000016470;ENSRNOG00000062245	Ndufa10;Ndufa10l1	2
sp|Q569A6|ERD21_RAT;sp|Q5U305|ERD22_RAT	ENSRNOG00000001083;ENSRNOG00000021082	Kdelr1;Kdelr2	2
sp|Q5BJN5|MIA40_RAT	ENSRNOG00000022466;ENSRNOG00000033038	Chchd4;LOC100361898	2
sp|Q5BJP2|CWC15_RAT;tr|D3ZS22|D3ZS22_RAT	ENSRNOG00000008490;ENSRNOG00000025157	AABR07008904.1;Cwc15	2
sp|Q5BJX1|RM41_RAT;tr|D3ZH23|D3ZH23_RAT	ENSRNOG00000029875;ENSRNOG00000034128	Mrpl41;RGD1560917	2
sp|Q5FVQ4|MLEC_RAT;tr|A0A0G2K121|A0A0G2K121_RAT	ENSRNOG00000021725	Mlec;Unc119b	2
sp|Q5HZV9|PP1R7_RAT;tr|R9PXV7|R9PXV7_RAT	ENSRNOG00000016974	AABR07068351.1;Ppp1r7	2
tr|M0RDI3|M0RDI3_RAT;sp|Q5PQK8|TBRG1_RAT	ENSRNOG00000023850;ENSRNOG00000033891	AABR07045058.1;Tbrg1	2
sp|Q5XI89|NXPE4_RAT;tr|A0A0G2JV58|A0A0G2JV58_RAT	ENSRNOG00000059851	AABR07070117.1;Nxpe4	2
tr|A0A0G2K9Q7|A0A0G2K9Q7_RAT;sp|Q62625-2|MLP3B_RAT;sp|Q62625|MLP3B_RAT;sp|Q6XVN8|MLP3A_RAT;tr|Q7TQ75|Q7TQ75_RAT	ENSRNOG00000017905;ENSRNOG00000025443	Map1lc3a;Map1lc3b	2
tr|A0A0A0MXY3|A0A0A0MXY3_RAT;sp|Q62763|KC1G3_RAT;tr|A0A0H2UHQ2|A0A0H2UHQ2_RAT;sp|Q62762|KC1G2_RAT	ENSRNOG00000016677;ENSRNOG00000018529	Csnk1g2;Csnk1g3	2
tr|A0A096MIU2|A0A096MIU2_RAT;sp|Q63398|COE1_RAT;tr|D3ZW79|D3ZW79_RAT;tr|D4A274|D4A274_RAT	ENSRNOG00000016102;ENSRNOG00000028845	Ebf1;Ebf3	2
tr|F1LSW7|F1LSW7_RAT;sp|Q63507|RL14_RAT;tr|B5DEM5|B5DEM5_RAT;tr|Q6TUH8|Q6TUH8_RAT	ENSRNOG00000019007;ENSRNOG00000031061	LOC306079;Rpl14	2
sp|Q63665-3|USF2_RAT;sp|Q63665-2|USF2_RAT;tr|A0A0G2K3J3|A0A0G2K3J3_RAT;sp|Q63665|USF2_RAT;tr|O35410|O35410_RAT	ENSRNOG00000004255;ENSRNOG00000053725	Usf1;Usf2	2
tr|A0A0G2K3Z9|A0A0G2K3Z9_RAT;sp|Q63716|PRDX1_RAT	ENSRNOG00000017194;ENSRNOG00000017695	AABR07012795.1;Prdx1	2
sp|Q642A5|DPOE3_RAT	ENSRNOG00000004843;ENSRNOG00000055277	LOC100362333;Pole3	2
sp|Q64LC9|RBM4B_RAT;tr|Q5U212|Q5U212_RAT	ENSRNOG00000050741;ENSRNOG00000061795	Rbm4;Rbm4b	2
sp|Q66HG8|RED_RAT;tr|A0A0G2K5G9|A0A0G2K5G9_RAT;tr|Q6QI75|Q6QI75_RAT	ENSRNOG00000017251	Ik;Wdr55	2
sp|Q6B345|S10AB_RAT;tr|F1LYQ0|F1LYQ0_RAT	ENSRNOG00000010105;ENSRNOG00000040101	AABR07026805.2;S100a11	2
sp|Q6P791|LTOR1_RAT	ENSRNOG00000020016	Lamtor1;LOC100361543	2
sp|Q6PDV7|RL10_RAT;tr|D4A1P2|D4A1P2_RAT	ENSRNOG00000032720;ENSRNOG00000056765	Rpl10;Rpl10l	2
sp|Q6PEC1|TBCA_RAT;tr|F1M825|F1M825_RAT	ENSRNOG00000016100;ENSRNOG00000048342	AABR07058934.1;Tbca	2
sp|Q6RUV5|RAC1_RAT;tr|A0A0G2K0X4|A0A0G2K0X4_RAT;tr|Q5U1Y2|Q5U1Y2_RAT	ENSRNOG00000001068;ENSRNOG00000007350	Rac1;Rac2	2
sp|Q6URK4-2|ROA3_RAT;tr|E9PSU5|E9PSU5_RAT;tr|D4A6A2|D4A6A2_RAT	ENSRNOG00000038905;ENSRNOG00000052968	AABR07048397.1;Hnrnpa3	2
tr|B5DF60|B5DF60_RAT;tr|A0A0G2JVA7|A0A0G2JVA7_RAT;sp|Q6VV72|IF1A_RAT	ENSRNOG00000005736;ENSRNOG00000031421	Eif1a;Eif1ax	2
tr|M0R971|M0R971_RAT;sp|Q6Y290|GOLI_RAT	ENSRNOG00000046330	AABR07029581.1;Rnf130	2
sp|Q712U5|ARP19_RAT;sp|Q712U5-2|ARP19_RAT	ENSRNOG00000023086	Arpp19;LOC100360828	2
sp|Q71TY3|RS27_RAT;tr|M0RA26|M0RA26_RAT	ENSRNOG00000016961;ENSRNOG00000021159	LOC100362987;Rps27	2
sp|Q7TM96|ZN622_RAT;tr|Q5M855|Q5M855_RAT;tr|A0A0G2K4L3|A0A0G2K4L3_RAT		Retreg1;Zfp622	2
sp|Q7TP54|RIPR2_RAT;sp|P02793|FRIL1_RAT;tr|M0R6L9|M0R6L9_RAT;tr|M0R597|M0R597_RAT;tr|M0R5T8|M0R5T8_RAT;tr|M0RCS3|M0RCS3_RAT;tr|F1M5T1|F1M5T1_RAT	ENSRNOG00000004662;ENSRNOG00000018804;ENSRNOG00000020843;ENSRNOG00000029082;ENSRNOG00000031506;ENSRNOG00000031540;ENSRNOG00000033776;ENSRNOG00000034150	AABR07005031.1;AABR07041778.1;AC115277.1;Ftl1;LOC100359668;LOC100360087;LOC100362384;Ripor2	8
sp|Q8VIF7|SBP1_RAT;tr|F1LRJ9|F1LRJ9_RAT	ENSRNOG00000047158;ENSRNOG00000053812	LOC103689947;Selenbp1	2
sp|Q923I8|CRY2_RAT;tr|B2GUU9|B2GUU9_RAT;sp|Q32Q86|CRY1_RAT	ENSRNOG00000006622;ENSRNOG00000007478	Cry1;Cry2	2
tr|Q5EBD0|Q5EBD0_RAT;sp|Q99MS0|S14L2_RAT;tr|A0A0G2K7A8|A0A0G2K7A8_RAT;tr|D3ZUU8|D3ZUU8_RAT	ENSRNOG00000004555;ENSRNOG00000004672	Sec14l2;Sec14l4	2
tr|A0A0G2K9Y5|A0A0G2K9Y5_RAT;sp|Q99PS8|HRG_RAT;tr|A0A0G2K3G0|A0A0G2K3G0_RAT	ENSRNOG00000001809	Hrg;LOC681544	2
tr|A0A0G2K613|A0A0G2K613_RAT;sp|Q9EPH2|MRP_RAT	ENSRNOG00000009113;ENSRNOG00000054614	AABR07002779.1;Marcksl1	2
sp|Q9JJW3|ATPMK_RAT	ENSRNOG00000020296;ENSRNOG00000042869	Atp5mk;LOC103693430	2
tr|D3ZCM6|D3ZCM6_RAT;sp|Q9R141|S22A4_RAT	ENSRNOG00000046195	AABR07029596.1;Slc22a4	2
tr|F1LP21|F1LP21_RAT;sp|Q9WVA1|TIM8A_RAT;tr|F1M556|F1M556_RAT	ENSRNOG00000011226;ENSRNOG00000043480	AABR07071440.1;Timm8a1	2
tr|A0A096MIZ1|A0A096MIZ1_RAT;tr|D4A4D8|D4A4D8_RAT	ENSRNOG00000025558;ENSRNOG00000051069	AC134204.1;Palm2	2
tr|A0A0G2K7X6|A0A0G2K7X6_RAT;tr|A0A0G2JY21|A0A0G2JY21_RAT;tr|A0A0G2JUH2|A0A0G2JUH2_RAT;tr|A0A0G2JZQ1|A0A0G2JZQ1_RAT	ENSRNOG00000018033	Ddx19a;Ddx19b	2
tr|A0A0G2JV37|A0A0G2JV37_RAT	ENSRNOG00000036571	Ces2;Ces2c;LOC100365112	3
tr|B4F7C9|B4F7C9_RAT;tr|A0A0G2JWH5|A0A0G2JWH5_RAT	ENSRNOG00000031896	Chek1;Stt3a	2
tr|G3V8B3|G3V8B3_RAT;tr|A0A0G2JXI9|A0A0G2JXI9_RAT;tr|G3V9C7|G3V9C7_RAT;tr|M0R4L7|M0R4L7_RAT;tr|D3ZWM5|D3ZWM5_RAT;tr|A0A0G2JXE0|A0A0G2JXE0_RAT;tr|D3ZNH4|D3ZNH4_RAT;sp|Q00715|H2B1_RAT;tr|D3ZLY9|D3ZLY9_RAT;sp|Q00729|H2B1A_RAT	ENSRNOG00000016865;ENSRNOG00000021198;ENSRNOG00000047776;ENSRNOG00000053845;ENSRNOG00000054296;ENSRNOG00000055512;ENSRNOG00000058187;ENSRNOG00000058263;ENSRNOG00000059382;ENSRNOG00000059949;ENSRNOG00000060769	H2bc1;H2bc12;H2bc9;Hist1h2bc;Hist1h2bd;Hist1h2bg;Hist1h2bl;Hist1h2bo;Hist1h2bq;LOC100364835;LOC100365043;LOC100910200;LOC102549061;LOC684797	14
tr|A0A0G2JY69|A0A0G2JY69_RAT;tr|G3V907|G3V907_RAT		LOC102548286;Pex19	2
tr|A0A0G2JY70|A0A0G2JY70_RAT	ENSRNOG00000054540;ENSRNOG00000061454	AABR07043775.1;AABR07043776.1	2
tr|A0A0G2JYP3|A0A0G2JYP3_RAT;tr|D3ZM54|D3ZM54_RAT	ENSRNOG00000016330	LOC679087;Rbm12b	2
tr|A0A0G2K1W6|A0A0G2K1W6_RAT;tr|M0RD43|M0RD43_RAT;tr|M0RB02|M0RB02_RAT;tr|M0R6X6|M0R6X6_RAT;tr|M0R6H0|M0R6H0_RAT;tr|F7F9J5|F7F9J5_RAT;tr|A0A0G2KB45|A0A0G2KB45_RAT;tr|A0A0G2K9M1|A0A0G2K9M1_RAT;tr|A0A0G2JVD7|A0A0G2JVD7_RAT;tr|A0A0G2K002|A0A0G2K002_RAT	ENSRNOG00000045597;ENSRNOG00000047877;ENSRNOG00000048904;ENSRNOG00000048921;ENSRNOG00000049650;ENSRNOG00000052559;ENSRNOG00000052690;ENSRNOG00000056438;ENSRNOG00000057798;ENSRNOG00000061317	AABR07004232.1;AABR07011733.1;AABR07018132.1;AABR07018556.1;AABR07037395.2;AABR07042361.1;AABR07053613.1;AABR07064622.1;AC102976.1;AC112624.1	10
tr|A0A0G2K277|A0A0G2K277_RAT	ENSRNOG00000029549	Eci2;Eci3	2
tr|A0A0G2K455|A0A0G2K455_RAT;tr|O70177|O70177_RAT	ENSRNOG00000036571	Ces2;Ces2c;LOC100365112	3
tr|A0A0G2K4S5|A0A0G2K4S5_RAT;tr|D3ZQG9|D3ZQG9_RAT;tr|Q95II0|Q95II0_RAT;tr|Q861Q1|Q861Q1_RAT	ENSRNOG00000000723;ENSRNOG00000039744	RT1-CE4;RT1-CE5	2
tr|A0A0G2K4U2|A0A0G2K4U2_RAT	ENSRNOG00000018937	Gstm2;Gstm7	2
tr|A0A0G2K5A4|A0A0G2K5A4_RAT;tr|D3ZLD5|D3ZLD5_RAT	ENSRNOG00000037437;ENSRNOG00000061046	AABR07059632.3;Golga3	2
tr|A0A0G2K5Q8|A0A0G2K5Q8_RAT	ENSRNOG00000020500	Clk2;Scamp3	2
tr|A0A0G2K719|A0A0G2K719_RAT;tr|D3ZN21|D3ZN21_RAT	ENSRNOG00000002501;ENSRNOG00000023383	Ddx3x;Ddx3y	2
tr|A0A0G2K916|A0A0G2K916_RAT;tr|E9PTK9|E9PTK9_RAT	ENSRNOG00000030247	Ankhd1;Eif4ebp3	2
tr|A0A0G2K9Y7|A0A0G2K9Y7_RAT;tr|F1LQJ4|F1LQJ4_RAT;tr|A0A0G2JX75|A0A0G2JX75_RAT	ENSRNOG00000015438	Ces1f;LOC501233	2
tr|A0A0U1RRV2|A0A0U1RRV2_RAT;tr|D4A2E4|D4A2E4_RAT;tr|Q6TXE7|Q6TXE7_RAT;sp|Q4QQU7|GRTP1_RAT	ENSRNOG00000019504;ENSRNOG00000061995	AABR07026536.1;Grtp1	2
tr|A0A140TAI6|A0A140TAI6_RAT;tr|D3ZZ95|D3ZZ95_RAT;tr|M0RCN1|M0RCN1_RAT;tr|D4A1Q0|D4A1Q0_RAT;sp|P39032|RL36_RAT;tr|F1M706|F1M706_RAT;tr|D3ZJJ6|D3ZJJ6_RAT	ENSRNOG00000002340;ENSRNOG00000029560;ENSRNOG00000029988;ENSRNOG00000031947;ENSRNOG00000033473;ENSRNOG00000055777	AABR07007675.1;AABR07064980.1;AABR07071986.1;AABR07072272.1;LOC100361079;Rpl36	6
tr|A2VD11|A2VD11_RAT;tr|D3ZGE8|D3ZGE8_RAT	ENSRNOG00000029606;ENSRNOG00000047456	AABR07024964.1;Yju2	2
tr|A7M776|A7M776_RAT;tr|Q6IG08|Q6IG08_RAT;tr|A0A1W2Q669|A0A1W2Q669_RAT;tr|A7M775|A7M775_RAT;tr|Q6IG11|Q6IG11_RAT	ENSRNOG00000030814;ENSRNOG00000036871	Kb23;Krt81	2
tr|B0BMZ1|B0BMZ1_RAT;tr|M0R549|M0R549_RAT	ENSRNOG00000000551;ENSRNOG00000051000	Fam241b;LOC685881	2
tr|B1WC16|B1WC16_RAT;tr|A0A0G2K2S3|A0A0G2K2S3_RAT;tr|A0A0G2K1G0|A0A0G2K1G0_RAT	ENSRNOG00000058050	Bclaf1;Mtfr2	2
tr|B2RYT0|B2RYT0_RAT;tr|M0R3S1|M0R3S1_RAT	ENSRNOG00000024845;ENSRNOG00000048409	Mrps21;Mrps21l	2
tr|B2RZD4|B2RZD4_RAT;tr|F1LQ14|F1LQ14_RAT;tr|D4A4W9|D4A4W9_RAT;sp|P11250|RL34_RAT	ENSRNOG00000016387;ENSRNOG00000038045	AC128960.1;Rpl34	2
tr|D3ZSF9|D3ZSF9_RAT;tr|B2RZD5|B2RZD5_RAT	ENSRNOG00000011817;ENSRNOG00000029173	AABR07053716.1;Rpl22l1	2
tr|B5DEL8|B5DEL8_RAT;tr|A0A0G2JZJ9|A0A0G2JZJ9_RAT	ENSRNOG00000026646;ENSRNOG00000029339;ENSRNOG00000052764	AABR07016779.1;LOC100363268;Ndufs5	3
tr|B5DEP4|B5DEP4_RAT;sp|P0C2B9|RM42_RAT	ENSRNOG00000025964;ENSRNOG00000042740	LOC103691922;Mrpl42	2
tr|B5DEP7|B5DEP7_RAT	ENSRNOG00000016507;ENSRNOG00000032232	LOC687679;Snrpg	2
tr|B5DFK8|B5DFK8_RAT;tr|G3V6B0|G3V6B0_RAT;tr|A0A0G2K7V9|A0A0G2K7V9_RAT;tr|A0A0G2K8S0|A0A0G2K8S0_RAT;tr|F1M024|F1M024_RAT	ENSRNOG00000002407;ENSRNOG00000050441	AABR07028989.1;Pdxdc1	2
tr|D3Z8C9|D3Z8C9_RAT;tr|D3ZDI8|D3ZDI8_RAT	ENSRNOG00000000065;ENSRNOG00000017816	Pde6a;Pde6b	2
tr|D3Z8R4|D3Z8R4_RAT;tr|F1LT30|F1LT30_RAT	ENSRNOG00000002871;ENSRNOG00000002874	AABR07065078.1;Rbm25l1	2
tr|D3ZAR3|D3ZAR3_RAT;tr|A0A0G2JWA0|A0A0G2JWA0_RAT;tr|A0A0G2JYK8|A0A0G2JYK8_RAT;tr|D4A0K9|D4A0K9_RAT;tr|D3ZS07|D3ZS07_RAT;tr|A0A0G2JUT6|A0A0G2JUT6_RAT;tr|D3ZBZ0|D3ZBZ0_RAT	ENSRNOG00000009168;ENSRNOG00000029177;ENSRNOG00000029760;ENSRNOG00000042517;ENSRNOG00000055916;ENSRNOG00000059417	AABR07012291.1;AABR07012291.2;AABR07012299.1;AABR07012302.1;Sprr2b;Sprr2d	6
tr|D3ZE15|D3ZE15_RAT;tr|F1LZC5|F1LZC5_RAT	ENSRNOG00000020602;ENSRNOG00000021688	AABR07056686.1;Ndufa13	2
tr|Q642E2|Q642E2_RAT;tr|D3ZJD3|D3ZJD3_RAT;tr|D3ZEI0|D3ZEI0_RAT;sp|P17702|RL28_RAT	ENSRNOG00000009240;ENSRNOG00000017127;ENSRNOG00000037673	AABR07016623.1;AABR07071891.1;Rpl28	3
tr|D3ZFY8|D3ZFY8_RAT	ENSRNOG00000025580	LOC679539;Ube2v1	2
tr|D3ZG07|D3ZG07_RAT	ENSRNOG00000030374;ENSRNOG00000049370	LOC100360750;Lsm6	2
tr|D3ZGK7|D3ZGK7_RAT;sp|P10959|EST1C_RAT	ENSRNOG00000015438	Ces1c;Ces1f;LOC501233	3
tr|D3ZJ08|D3ZJ08_RAT		H3c13;Hist2h3c2;LOC102548682;LOC102549173	4
tr|M0RC60|M0RC60_RAT;tr|D3ZNV6|D3ZNV6_RAT	ENSRNOG00000028176	Elmod2;LOC102554034	2
tr|M0RBQ5|M0RBQ5_RAT;tr|D3ZNZ9|D3ZNZ9_RAT	ENSRNOG00000031790;ENSRNOG00000043419	H2bu1;Hist3h2ba	2
tr|Q6PDW2|Q6PDW2_RAT;tr|D3ZPN7|D3ZPN7_RAT;tr|D4A870|D4A870_RAT;tr|D3ZZH9|D3ZZH9_RAT;tr|M0R5R7|M0R5R7_RAT;tr|D3ZPH0|D3ZPH0_RAT;tr|D3ZMI8|D3ZMI8_RAT;tr|D3Z9G3|D3Z9G3_RAT;tr|F1LWH4|F1LWH4_RAT;tr|D3ZRA9|D3ZRA9_RAT;tr|D3ZLH3|D3ZLH3_RAT;tr|D3ZEK2|D3ZEK2_RAT;sp|P20280|RL21_RAT;tr|D3ZHP4|D3ZHP4_RAT;tr|D4A219|D4A219_RAT;tr|M0RAP0|M0RAP0_RAT;tr|D4A7B4|D4A7B4_RAT	ENSRNOG00000000957;ENSRNOG00000029410;ENSRNOG00000030999;ENSRNOG00000031560;ENSRNOG00000032803;ENSRNOG00000033115;ENSRNOG00000033855;ENSRNOG00000036588;ENSRNOG00000038458;ENSRNOG00000045767;ENSRNOG00000045975;ENSRNOG00000046349;ENSRNOG00000047992;ENSRNOG00000048518;ENSRNOG00000048753;ENSRNOG00000049848;ENSRNOG00000050165;ENSRNOG00000053044;ENSRNOG00000055038	AABR07008350.1;AABR07012775.1;AABR07013302.1;AABR07013410.1;AABR07026240.1;AABR07028558.1;AABR07030162.1;AABR07034641.1;AABR07037412.1;AABR07062466.1;AABR07067388.1;AABR07067829.1;AABR07069587.1;AABR07070238.2;AC121209.1;Rpl21	16
tr|M0R5Y4|M0R5Y4_RAT;tr|D3ZTC5|D3ZTC5_RAT;tr|M0RCF7|M0RCF7_RAT	ENSRNOG00000047186	LOC100912348;Myot	2
tr|D3ZZW2|D3ZZW2_RAT;tr|F1M6L8|F1M6L8_RAT;tr|D3ZP49|D3ZP49_RAT	ENSRNOG00000021723;ENSRNOG00000043400;ENSRNOG00000047225	AC139642.2;LOC100910678;Tma7	3
tr|D4A2I4|D4A2I4_RAT;tr|E9PSZ0|E9PSZ0_RAT	ENSRNOG00000030120;ENSRNOG00000042961	Ormdl1;Ormdl2	2
tr|D4A3I4|D4A3I4_RAT;tr|A0A0G2K4W2|A0A0G2K4W2_RAT	ENSRNOG00000008512;ENSRNOG00000024829	AABR07014804.1;Btf3l4	2
tr|M0RA24|M0RA24_RAT;tr|D4A4P3|D4A4P3_RAT	ENSRNOG00000011825;ENSRNOG00000048888	AABR07060996.1;Ndufb3	2
tr|G3V9A4|G3V9A4_RAT;tr|D4A5A2|D4A5A2_RAT;tr|Q5MYW5|Q5MYW5_RAT;sp|Q05961|OAS1A_RAT;tr|Q5MYX1|Q5MYX1_RAT	ENSRNOG00000001369;ENSRNOG00000047076	Oas1a;Oas1i	2
tr|D4AA36|D4AA36_RAT;tr|D3ZMU8|D3ZMU8_RAT	ENSRNOG00000037600;ENSRNOG00000054203	Sim1;Sim2	2
tr|D4ACN9|D4ACN9_RAT;tr|A0A0G2JV03|A0A0G2JV03_RAT	ENSRNOG00000013802;ENSRNOG00000054284	AABR07072639.2;Slc25a36	2
tr|M0R7R1|M0R7R1_RAT;tr|F1LLV6|F1LLV6_RAT	ENSRNOG00000015438	Ces1f;LOC501233	2
tr|F1LN29|F1LN29_RAT;tr|A0A0G2K703|A0A0G2K703_RAT;sp|Q68SB1-3|STAU2_RAT;sp|Q68SB1-4|STAU2_RAT;sp|Q68SB1-2|STAU2_RAT;sp|Q68SB1|STAU2_RAT	ENSRNOG00000042458	AABR07046707.1;Stau2	2
tr|F1LNL2|F1LNL2_RAT;tr|F1M7H3|F1M7H3_RAT	ENSRNOG00000018149;ENSRNOG00000021584	AABR07028349.1;Smarca5	2
tr|Q6TXI6|Q6TXI6_RAT;tr|F1LTX8|F1LTX8_RAT	ENSRNOG00000003883;ENSRNOG00000004402	LOC317456;Lpgat1	2
tr|F1M9D6|F1M9D6_RAT;tr|A0A0G2JX93|A0A0G2JX93_RAT	ENSRNOG00000014079	Stat1;Stat4	2
tr|F1M9N8|F1M9N8_RAT;sp|O54960|CAPON_RAT	ENSRNOG00000042929	LOC100361087;Nos1ap	2
tr|F7EPH4|F7EPH4_RAT;tr|A0A0G2JUD2|A0A0G2JUD2_RAT	ENSRNOG00000000557	Ppa1;Sar1a	2
tr|G3V6I9|G3V6I9_RAT;sp|P12749|RL26_RAT;tr|D4A1Z2|D4A1Z2_RAT;tr|D4AE42|D4AE42_RAT	ENSRNOG00000004214;ENSRNOG00000032777;ENSRNOG00000039783	AABR07058519.1;AC094217.1;Rpl26	3
tr|G3V6Y1|G3V6Y1_RAT;sp|P18863|HXB8_RAT;sp|P18866|HXC8_RAT;tr|F1MAK7|F1MAK7_RAT	ENSRNOG00000007585;ENSRNOG00000028619	Hoxb8;Hoxc8	2
tr|G3V7F6|G3V7F6_RAT	ENSRNOG00000010732;ENSRNOG00000020771	RGD1561590;Sap18	2
tr|G3V8H1|G3V8H1_RAT;tr|A0A0G2K6G1|A0A0G2K6G1_RAT;sp|P36373|KLK7_RAT	ENSRNOG00000032857	Klk1;Klk1b3;Klk1c9	3
tr|H8Y6S5|H8Y6S5_RAT	ENSRNOG00000057676	Myzap;Polr2m	2
tr|M0R9B9|M0R9B9_RAT;tr|D3ZCR9|D3ZCR9_RAT;tr|A0A0G2K3V1|A0A0G2K3V1_RAT	ENSRNOG00000046969	AABR07034438.1;LOC100911374	2
tr|M0R9N6|M0R9N6_RAT;tr|M0RA89|M0RA89_RAT;tr|Q5MYW8|Q5MYW8_RAT;tr|A0A0G2JU81|A0A0G2JU81_RAT	ENSRNOG00000033220	Oas1b;Oas1f	2
tr|M0RDD7|M0RDD7_RAT;sp|Q498T2-2|CHTOP_RAT;sp|Q498T2|CHTOP_RAT	ENSRNOG00000012760;ENSRNOG00000058457	Chtop;Chtopl1	2
tr|M0RDJ7|M0RDJ7_RAT;tr|M0RBL8|M0RBL8_RAT	ENSRNOG00000046280;ENSRNOG00000046390;ENSRNOG00000049020	Tceal3;Tceal5;Tceal6	3
tr|Q5RK17|Q5RK17_RAT;tr|D4A7Z5|D4A7Z5_RAT	ENSRNOG00000008548;ENSRNOG00000029197	Diablo;LOC100360940	2
tr|Q5XIB7|Q5XIB7_RAT	ENSRNOG00000055179;ENSRNOG00000059572	Tsen34;Tsen34l1	2
tr|Q66HB1|Q66HB1_RAT;sp|A6H909|TBPL2_RAT	ENSRNOG00000001489;ENSRNOG00000033682	Tbp;Tbpl2	2
tr|Q66HM7|Q66HM7_RAT;sp|P38656|LA_RAT;tr|D3ZLH9|D3ZLH9_RAT	ENSRNOG00000007998;ENSRNOG00000011606	AABR07061825.1;Ssb	2
tr|Q6PDV8|Q6PDV8_RAT;sp|P47198|RL22_RAT	ENSRNOG00000011104;ENSRNOG00000028747	LOC100360057;Rpl22	2
tr|Q6PDW1|Q6PDW1_RAT;tr|D3ZHB3|D3ZHB3_RAT;sp|P63324|RS12_RAT	ENSRNOG00000016411;ENSRNOG00000020093	LOC100360573;Rps12	2
tr|Q6TXF6|Q6TXF6_RAT	ENSRNOG00000050424	Decr2;Nme4	2
tr|Q6XLI7|Q6XLI7_RAT	ENSRNOG00000019723;ENSRNOG00000050864	Cpne1;Rbm12	2
tr|Q7TP34|Q7TP34_RAT;sp|Q5M820-2|MOFA1_RAT;sp|Q5M820|MOFA1_RAT	ENSRNOG00000055319;ENSRNOG00000056162	AC111885.1;Mrfap1	2
tr|Q7TP91|Q7TP91_RAT;sp|Q9QXU2|SURF1_RAT	ENSRNOG00000005247;ENSRNOG00000060005	Surf1;Surf4	2
